# Supplementary material for: Mass-tagged aminated probes for rapid discovery of azaphilic natural products in fungal crude extracts
Source: Royal Society of Chemistry journal article supplement (doi:10.1039/d4cc05122j), 2024-11-14
Supplement: d4cc05122j1.pdf [file d4cc05122j1.pdf]

## Supporting information

### Mass-tagged aminated probes for rapid discovery of azaphilic natural products in fungal crude extracts

Victor Flon,<sup>a†</sup> Coralie Pavesi,<sup>†b</sup> Samuel Oger,<sup>a</sup> Stéphane Leleu,<sup>a</sup> Pascal Retailleau,<sup>c</sup> Laurence Jennings<sup>d</sup>, Soizic Prado<sup>\*b</sup> and Xavier Franck<sup>\*a</sup>

#### Contents

|                                                                                                     |    |
|-----------------------------------------------------------------------------------------------------|----|
| 1) General experimental procedure for the obtention of probe 1.....                                 | 1  |
| 2) Instruments and Methods for the probe 1. ....                                                    | 1  |
| 3) Chemical synthesis of probe 1.....                                                               | 1  |
| 4) NMR spectra of probe 1. ....                                                                     | 4  |
| 5) General experimental procedure. ....                                                             | 9  |
| 6) Fungal material.....                                                                             | 10 |
| 7) Protocol of the probe addition in <i>T. flavus</i> and <i>B. robillardoides</i> extracts. ....   | 10 |
| 8) Detection of tagged compounds from <i>B. robillardoides</i> extract. ....                        | 10 |
| 9) Detection of the tagged compounds from <i>T. flavus</i> extract. ....                            | 11 |
| 10) Extraction and isolation of compounds 2 and 3 from <i>T. flavus</i> crude extract. ....         | 11 |
| 11) Extraction and isolation of compounds 4 and 5 from <i>B. robillardoides</i> crude extract. .... | 11 |
| 12) Spectroscopic data .....                                                                        | 12 |
| 13) NMR characterization of compounds (2-5) .....                                                   | 13 |
| 14) NMR spectra of compounds (2-5).....                                                             | 15 |
| 15) X-ray crystallographic analysis of compound 4 .....                                             | 30 |
| 16) Computational Methods. ....                                                                     | 35 |

### 1) General experimental procedure for the obtention of probe 1.

All chemicals were used as received from commercial sources without further purification. Solvents, unless otherwise stated, were purchased in reagent grade or HPLC grade and used as received. Aqueous mobile phases for HPLC were prepared with water that was purified by means of a MilliQ system (purified to 18.2 MΩ cm). All reactions were monitored by thin layer chromatography (TLC) and/or HPLC-MS. TLC were carried out on Merck DC Kieselgel 60 F-254 aluminum sheets. Visualization of spots was performed under a UV lamp at  $\lambda = 254$  or 365 nm, and/or staining with a  $\text{KMnO}_4$  solution/ $\text{K}_2\text{CO}_3 + 5\% \text{NaOH}$ , developed with heat. Flash column chromatography purifications were performed manually on silica gel (40–63  $\mu\text{M}$ ) under pressurized air flow.

### 2) Instruments and Methods for the probe 1.

HPLC-MS analyses were performed with a ThermoScientific UHPLC Vanquish Horizon/Flex with PDA detector coupled with a ThermoScientific ISQ EC Mass Spectrometer. The mass range was  $m/z$  : 100 to 1200, with unit mass resolution ionization technique by Heated Electrospray Ionization (HESI). Temperature of the column compartment was fixed at 40 °C. A Waters ACQUITY UPLC® BEH C18 column (1.7  $\mu\text{m}$ , 2.1  $\times$  100 mm) was used with a binary solvent system composed of MeCN and 0.1% aq. formic acid (aq. FA, pH 2) as eluents (linear gradient from 5 to 100% MeCN over 9 min and isocratic gradient at 100% MeCN over 3 min) at a flow rate of 0.400 mL/min. High Resolution Mass spectrometry (HRMS) were obtained by using a Waters Micromass LCT Premier XE® equipped with an orthogonal acceleration time-of-flight (oa-TOF) and an electrospray source in positive mode.

$^1\text{H}$ ,  $^{13}\text{C}$ ,  $^{31}\text{P}$  and NMR spectra were recorded on Brüker 300 machine operating at ambient probe temperature. The solvent resonance was used as the internal standard for  $^1\text{H}$ -NMR (chloroform-d at 7.26 ppm; MeOD at 3.31 ppm) and  $^{13}\text{C}$ -NMR (chloroform-d at 77.16 ppm; MeOD at 49.0 ppm). Chemical shifts ( $\delta$ ) were quoted in parts per million (ppm). Coupling constants (J) were quoted in Hertz (Hz). The following abbreviations were used to give the multiplicity of the NMR signals: s: singlet, bs: broad singlet, d: doublet, t: triplet, dd: doublet – doublet.

### 3) Chemical synthesis of probe 1.

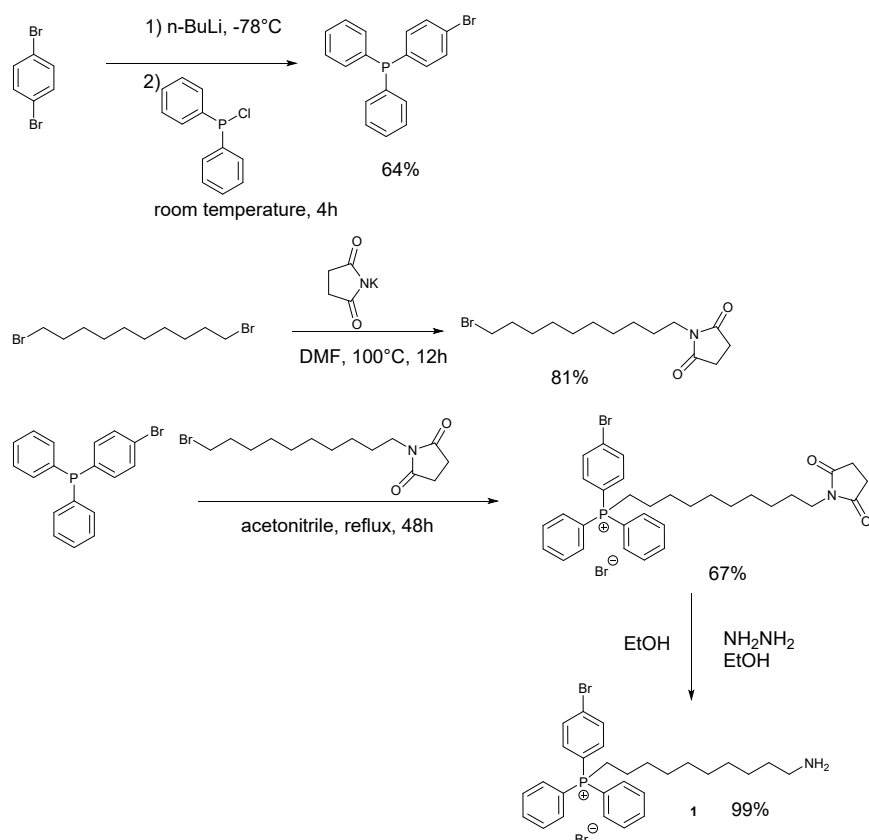

#### (4-bromophenyl)diphenylphosphine.

Under argon atmosphere, *n*-butyllithium (4.20 mL, 2.50 M, 10.50 mmol, 1.05 eq) was added slowly to a solution of 1,4-dibromobenzene (2.36 g, 10 mmol, 1 eq) in dry THF (50 mL) at  $-78^{\circ}\text{C}$ . After 30 mins, chlorodiphenylphosphine (1.80 mL, 10.00 mmol, 1 eq) was added and the resulting solution was stirred at room temperature for 4 h. After completion, the reaction mixture was diluted with water (40 mL) and the aqueous layer was extracted with AcOEt ( $3 \times 50$  mL). The organic layers were combined, dried over  $\text{MgSO}_4$  and filtered through a pad of Celite<sup>®</sup>. The filtrate was concentrated under reduced pressure and the crude product was purified by chromatography on silica gel in a system: DCM / Cyclohexane (0:4 v/v) to (1:4 v/v), giving the desired product as a white solid (2.17 g, 64%). The  $^1\text{H}$  NMR data were in accordance with literature data<sup>1</sup>.  $^1\text{H}$  RMN (300MHz,  $\text{CDCl}_3$ )  $\delta$  = 7.49-7.45 (m, 2 H), 7.37-7.27 (m, 10 H), 7.20-7.14 (m, 2 H).  $^{13}\text{C}$  NMR (75MHz,  $\text{CDCl}_3$ )  $\delta$  = 136.79, 136.65, 136.63, 135.50, 135.23, 133.98, 133.71, 131.84, 131.75, 129.11, 128.82, 128.73, 123.52.  $^{31}\text{P}$  NMR (121MHz,  $\text{CDCl}_3$ )  $\delta$  = -6.36. IR (neat,  $\text{cm}^{-1}$ ): 1575, 1477, 1436, 1383, 1191, 1117, 1068, 1009.

#### 2-(10-bromodecyl)isoindoline-1,3-dione.

To a solution of 1,10-dibromodecane (10.50 g, 35 mmol, 5 eq) in dry DMF (20 mL) was added potassium phthalimide (1.30 g, 7 mmol, 1 eq) and the reaction mixture was stirred at  $100^{\circ}\text{C}$  for 12 h. The solvent was evaporated to dryness, water (50 mL) was added and the aqueous phase was extracted with AcOEt ( $3 \times 50$  mL). The organic phases were combined, washed with a saturated aqueous solution of NaCl (50 mL), dried over  $\text{MgSO}_4$  and filtered through a pad of Celite<sup>®</sup>. The filtrate was concentrated under reduced pressure and the crude product was purified by chromatography on silica gel in a system: AcOEt / Cyclohexane (0:4 v/v) to (1:4 v/v), giving the desired product as a white amorphous solid (2.08 g, 81%).  $^1\text{H}$  NMR (300 MHz,  $\text{CDCl}_3$ )  $\delta$  = 7.85-7.69 (m, 4 H), 3.67 (t,  $J$  = 7.3 Hz, 2 H), 3.39 (t,  $J$  = 6.9 Hz, 2 H), 1.88-1.79 (m, 2 H), 1.71-1.62 (m, 2 H), 1.43-1.28 (m, 12 H).  $^{13}\text{C}$  NMR (75 MHz,  $\text{CDCl}_3$ )  $\delta$  = 168.64, 133.99, 132.33, 123.30, 38.20, 34.19, 32.97, 29.48, 29.46, 29.25, 28.85, 28.72, 28.29, 26.96. IR (neat,  $\text{cm}^{-1}$ ): 2928, 2850, 1713, 1396, 1073. HRMS (ESI+): Calc. for  $\text{C}_{18}\text{H}_{25}\text{BrNO}_2$  [ $\text{M}+\text{H}$ ]<sup>+</sup>: 366.1069-368.1048 ; found : 366.1086-368.1063.

*4-bromophenyl)(10-(1,3-dioxoisindolin-2-yl)decyl)diphenylphosphonium bromide.*

In a round bottom flask, (4-bromophenyl)diphenylphosphine (800 mg, 2.34 mmol, 1 eq) was solubilized in ACN (10 mL). 2-(10-bromodecyl)isoindoline-1,3-dione (859 mg, 2.34 mmol, 1 eq) was added and the reaction mixture was refluxed for 48 h. The reaction mixture was concentrated under reduced pressure and the resulting residue was purified by chromatography on silica gel in a system: EtOH / DCM (0:9 v/v) to (1:9 v/v), giving the desired product as a colorless oil (1.11 g, 67%). <sup>1</sup>H NMR (300 MHz, CDCl<sub>3</sub>) δ = 7.86-7.77 (m, 12 H), 7.72-7.66 (m, 6 H), 3.86 (bs, 2 H), 3.63 (t, *J* = 7.3 Hz, 2 H), 1.78 (bs, 2 H), 1.59 (bs, 4 H), 1.21 (m, 10 H). <sup>13</sup>C NMR (75 MHz, CDCl<sub>3</sub>) δ = 168.58, 135.37, 135.26, 135.22, 134.04, 133.99, 133.88, 133.75, 132.27, 131.02, 130.97, 130.75, 130.58, 123.26, 118.77, 118.27, 117.64, 117.11, 38.11, 30.51, 30.31, 29.38, 29.24, 29.11, 28.63, 26.86, 23.12, 22.76, 22.70, 22.47. <sup>31</sup>P NMR (121 MHz, CDCl<sub>3</sub>) δ = 24.95. IR (neat, cm<sup>-1</sup>): 3362, 2970, 2927, 1770, 1704, 1482, 1466, 1437, 1397, 1113, 1068, 1046, 1087, 1007. HRMS (ESI+): Calc. for C<sub>36</sub>H<sub>38</sub>BrNO<sub>2</sub>P<sup>+</sup> [M]<sup>+</sup>: 626.1824 - 628.1803 ; found : 626.1818 - 628.1808.

**(4-bromophenyl)(10-(methylamino)decyl)diphenylphosphonium bromide 1.**

To a solution of (4-bromophenyl)(10-(1,3-dioxoisindolin-2-yl)decyl)diphenylphosphonium bromide (1.1 g, 1.55 mmol, 1 eq) in EtOH (10 mL), hydrazine monohydrate (150 μL, 3.10 mmol, 2 eq) was added at room temperature. The reaction mixture was heated at reflux for 4 h then, it was cooled at 0°C in a bath of ice. The white precipitate was removed by filtration and the filtrate was concentrated under reduced pressure giving the desired product probe **1** as a yellowish amorphous solid (890 mg, quantitative), which was used without further purification. <sup>1</sup>H NMR (300 MHz, MeOD) δ 7.98-7.87 (m, 4 H), 7.85-7.67 (m, 10 H), 3.47-3.37 (m, 2 H), 2.91 (t, *J* = 7.4 Hz, 2 H), 1.69-1.51 (m, 6H), 1.40-1.31 (m, 10H). <sup>13</sup>C NMR (75 MHz, MeOD) δ = 136.49, 136.43, 136.39, 136.34, 134.92, 134.79, 134.76, 134.00, 131.69, 131.52, 126.54, 120.12, 119.92, 118.97, 118.75, 40.76, 31.75, 31.53, 30.36, 30.19, 29.92, 28.58, 27.46, 23.55, 23.49, 22.91, 22.24. <sup>31</sup>P NMR (121 MHz, MeOD) δ = 24.15. IR (neat, cm<sup>-1</sup>): 3390, 2927, 1627, 1573, 1483, 1387, 1190, 1113, 1069, 1007. HRMS (ESI+): Calc. for C<sub>28</sub>H<sub>36</sub>BrNP<sup>+</sup> [M]<sup>+</sup>: 496.1769 - 498.1748 ; found : 496.1766 - 498.1765.

#### 4) NMR spectra

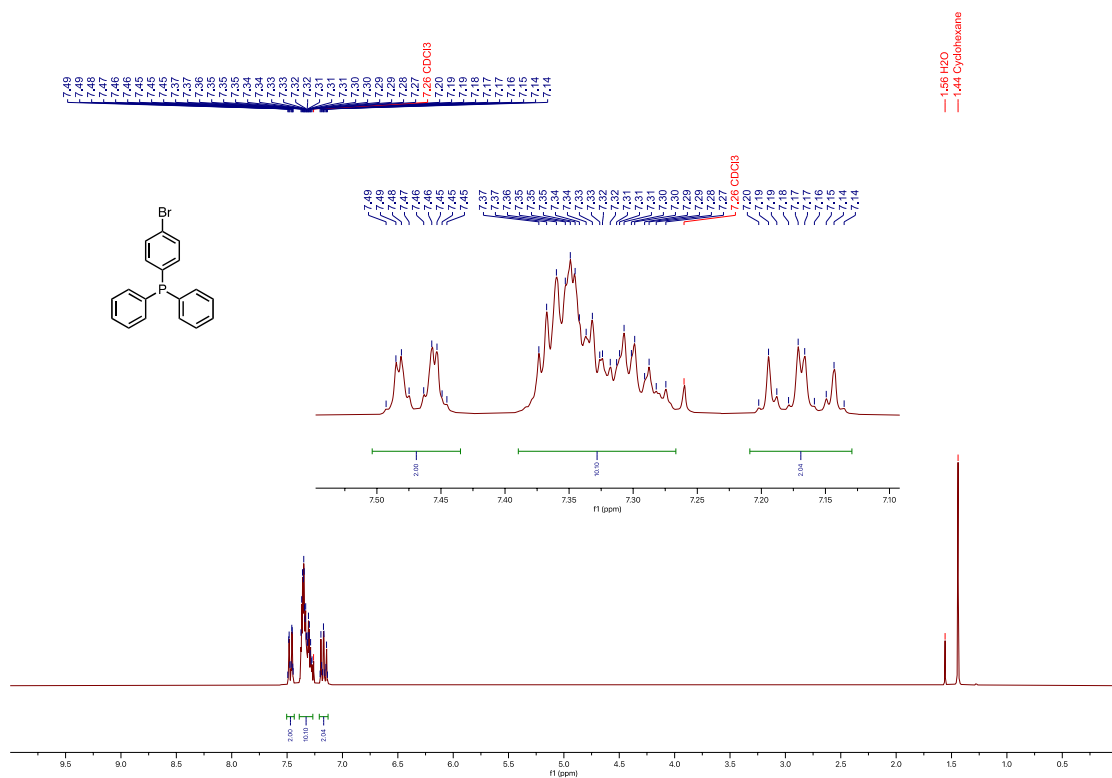

Figure S1 <sup>1</sup>H NMR of (4-bromophenyl)diphenylphosphine

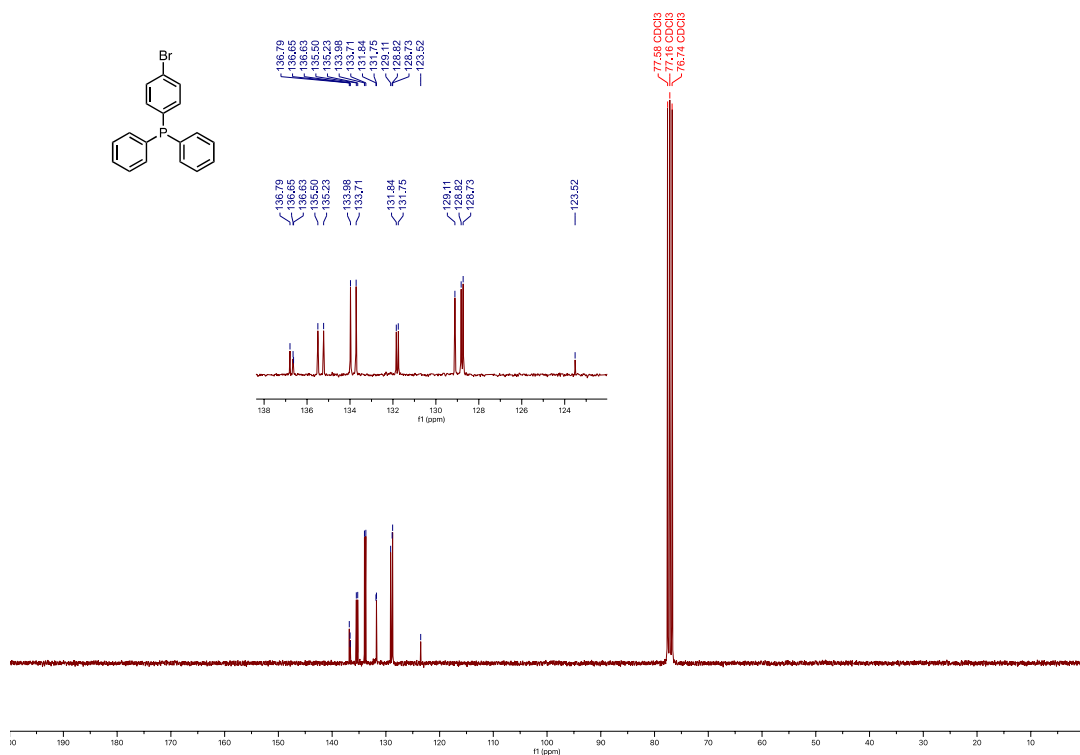

Figure S2 <sup>13</sup>C NMR of (4-bromophenyl)diphenylphosphine

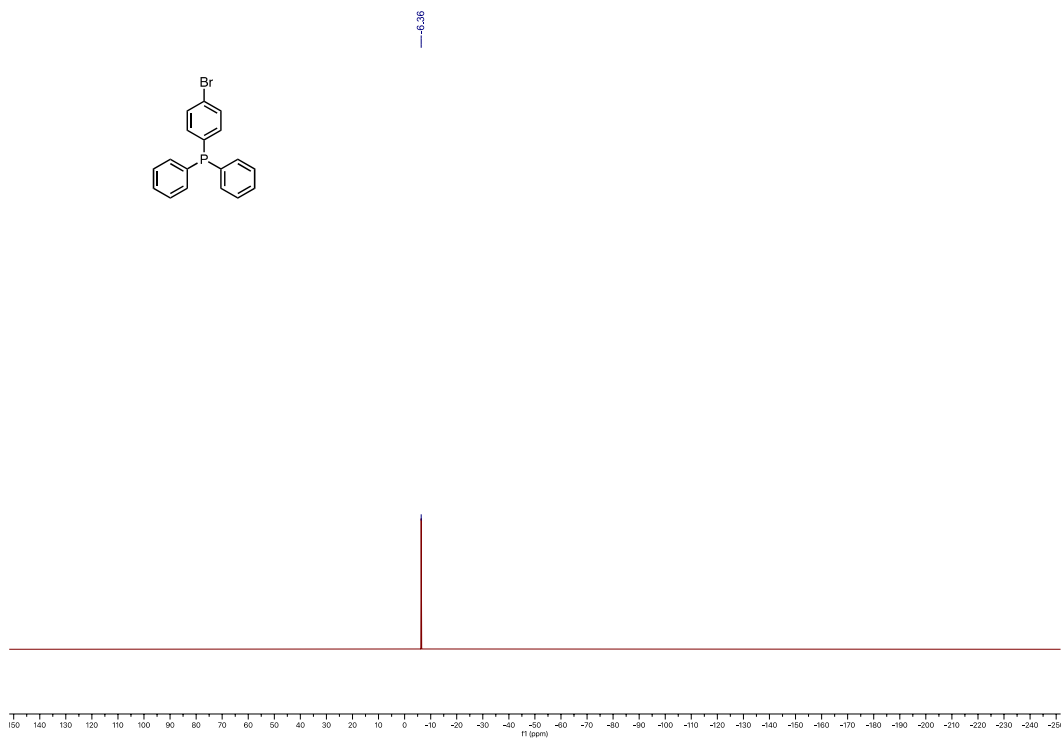

Figure S3  $^{31}\text{P}$  NMR of (4-bromophenyl)diphenylphosphine

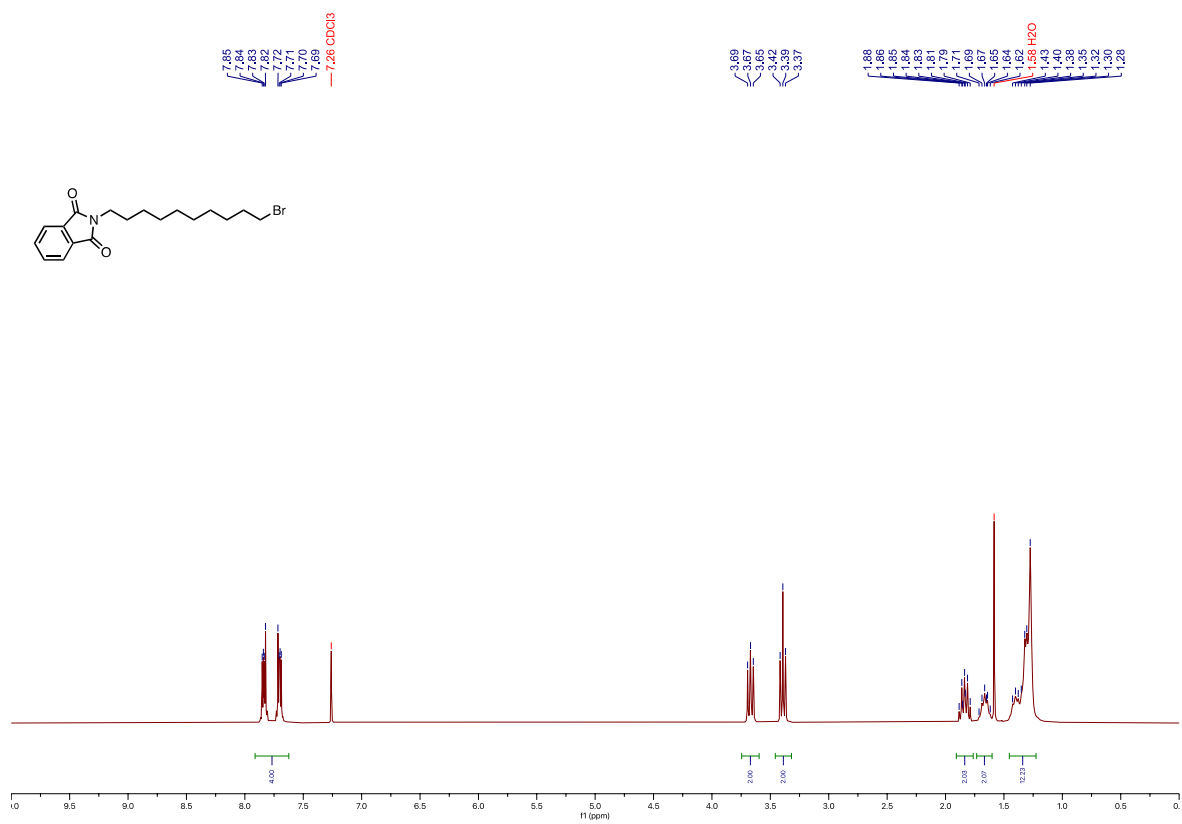

Figure S4  $^1\text{H}$  NMR of 2-(10-bromodecyl)isoindoline-1,3-dione

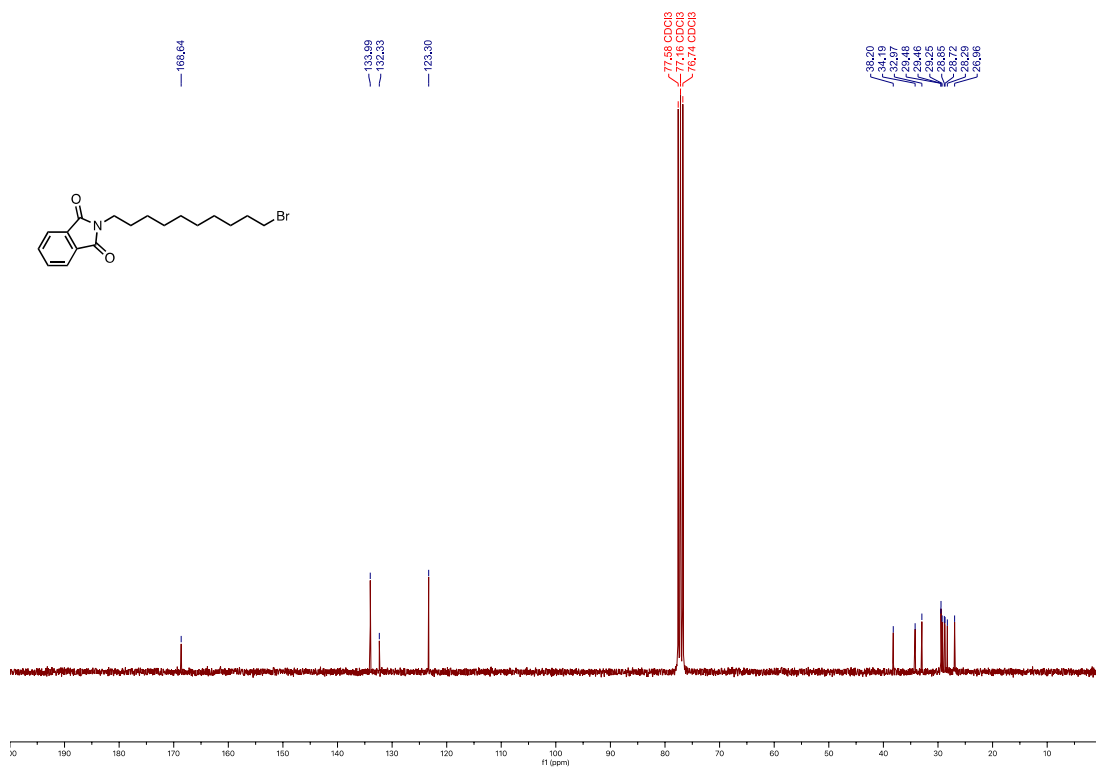

Figure S5  $^{13}\text{C}$  NMR of 2-(10-bromodecyl)isoindoline-1,3-dione

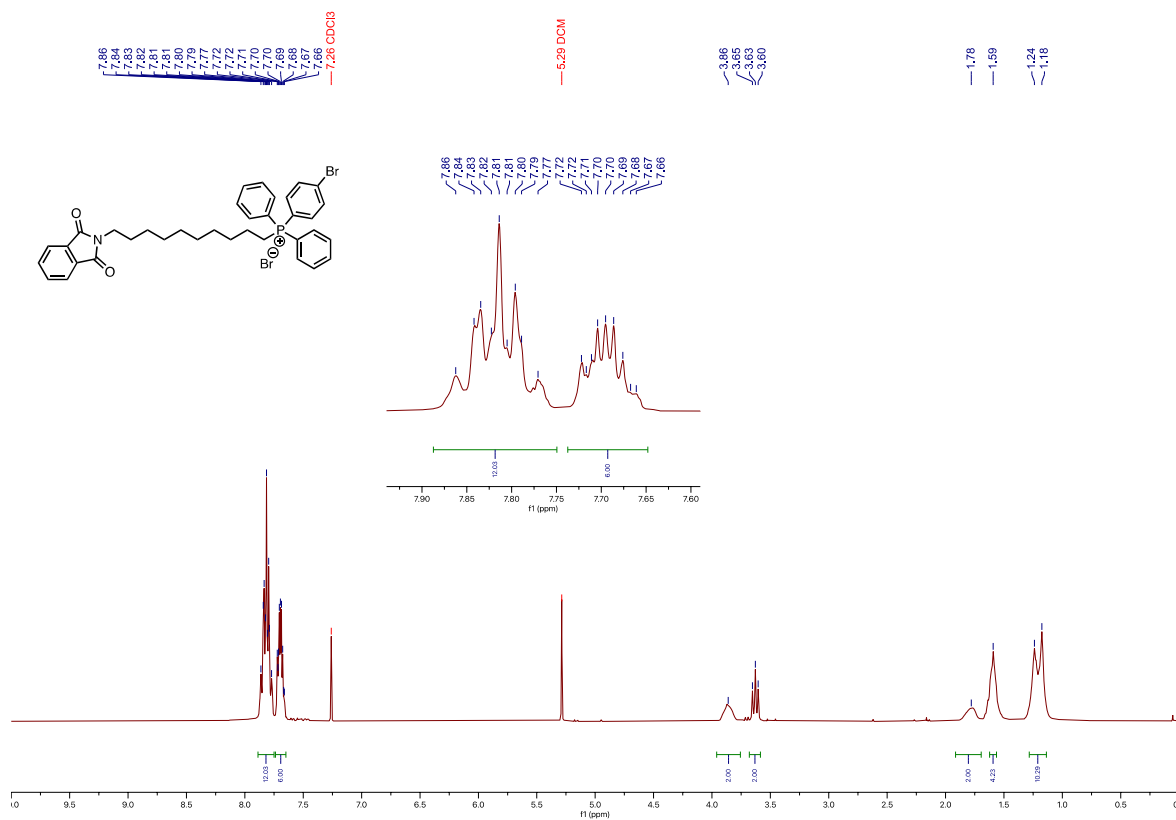

Figure S6  $^1\text{H}$  NMR of 4-bromophenyl(10-(1,3-dioxisoindolin-2-yl)decyl)diphenylphosphonium bromide hydrate

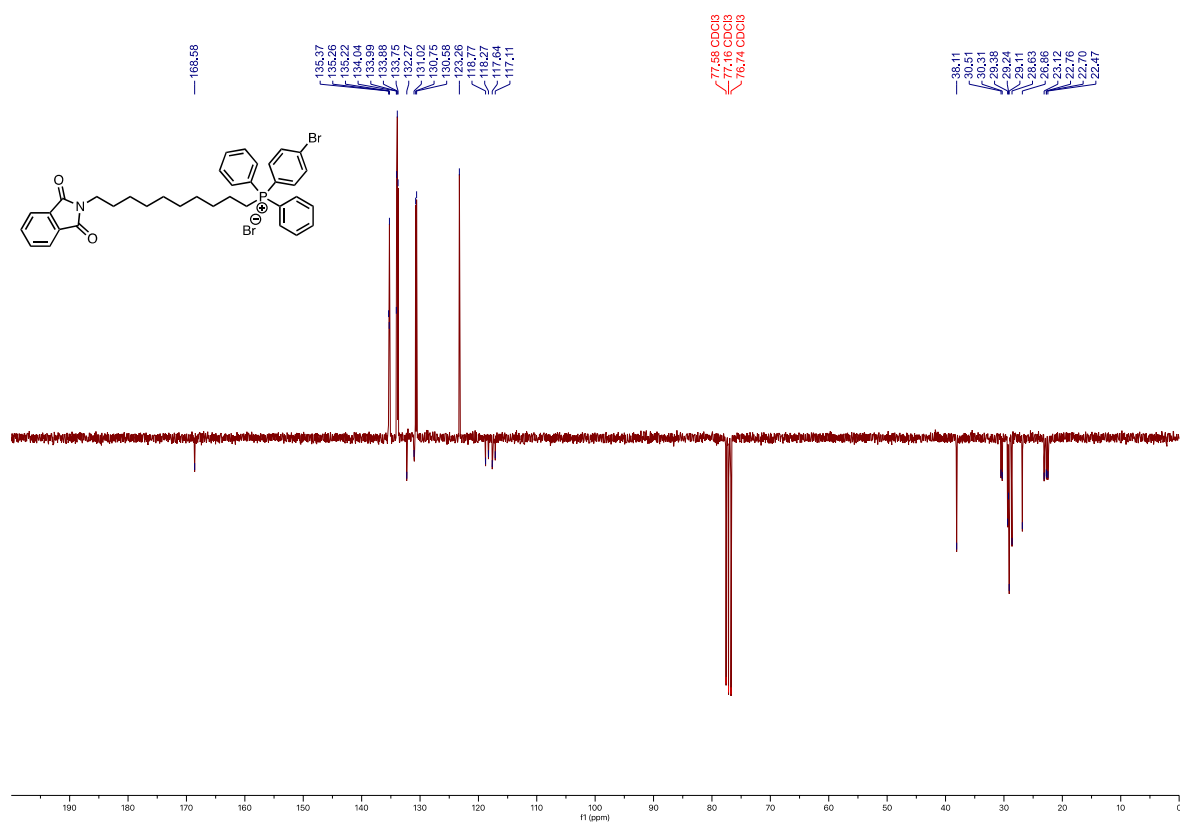

Figure S7 <sup>13</sup>C NMR of 4-bromophenyl(10-(1,3-dioxisoindolin-2-yl)decyl)diphenylphosphonium bromide hydrate

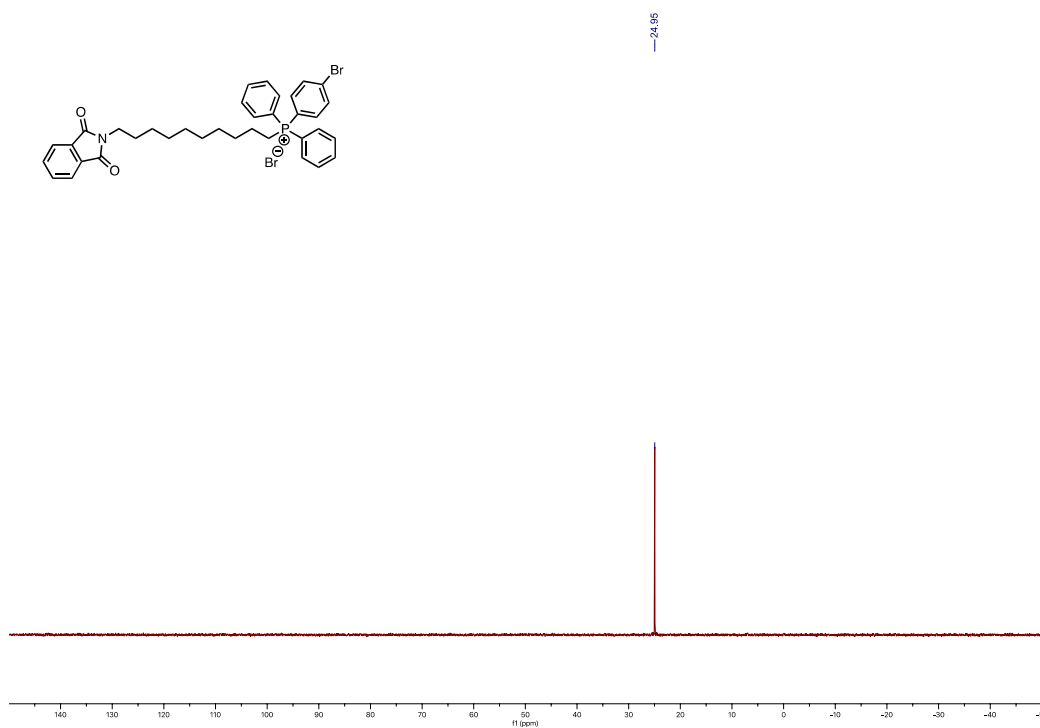

Figure S8 <sup>31</sup>P NMR of 4-bromophenyl(10-(1,3-dioxisoindolin-2-yl)decyl)diphenylphosphonium bromide hydrate



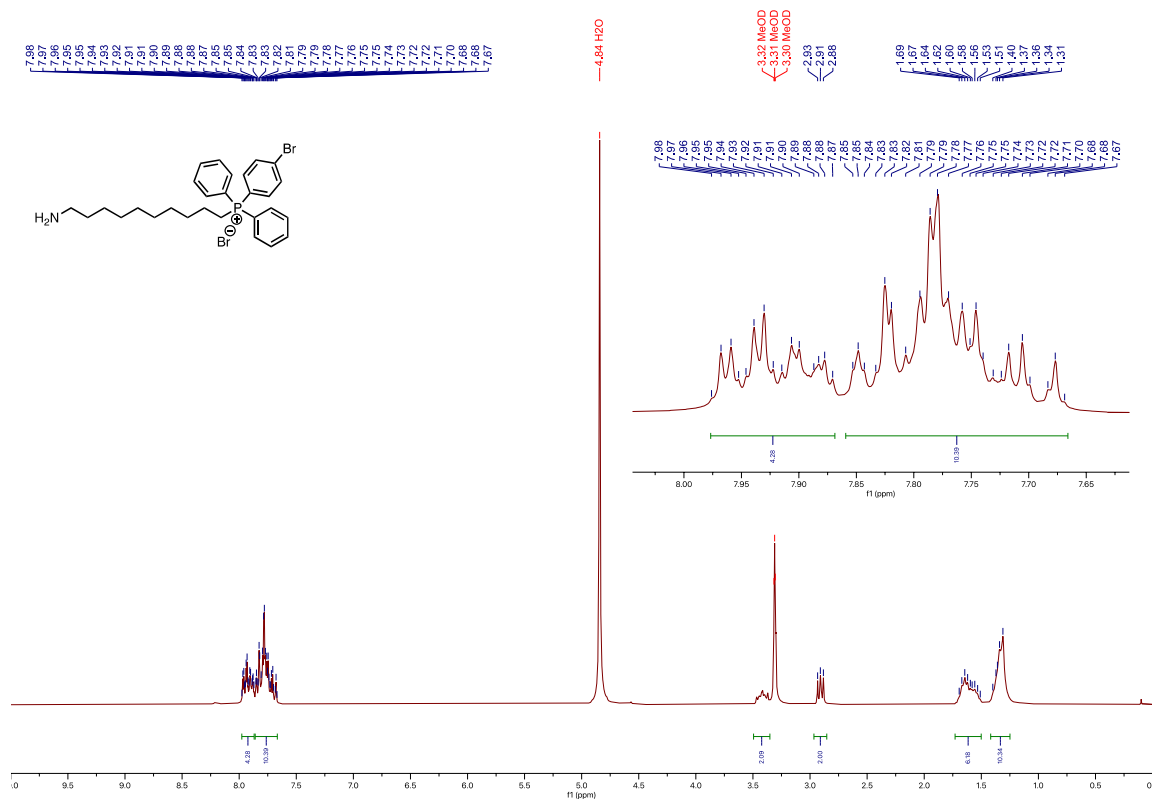

Figure S9 <sup>1</sup>H NMR of (4-bromophenyl)(10-(methylamino)decyl)diphenylphosphonium bromide hydrate

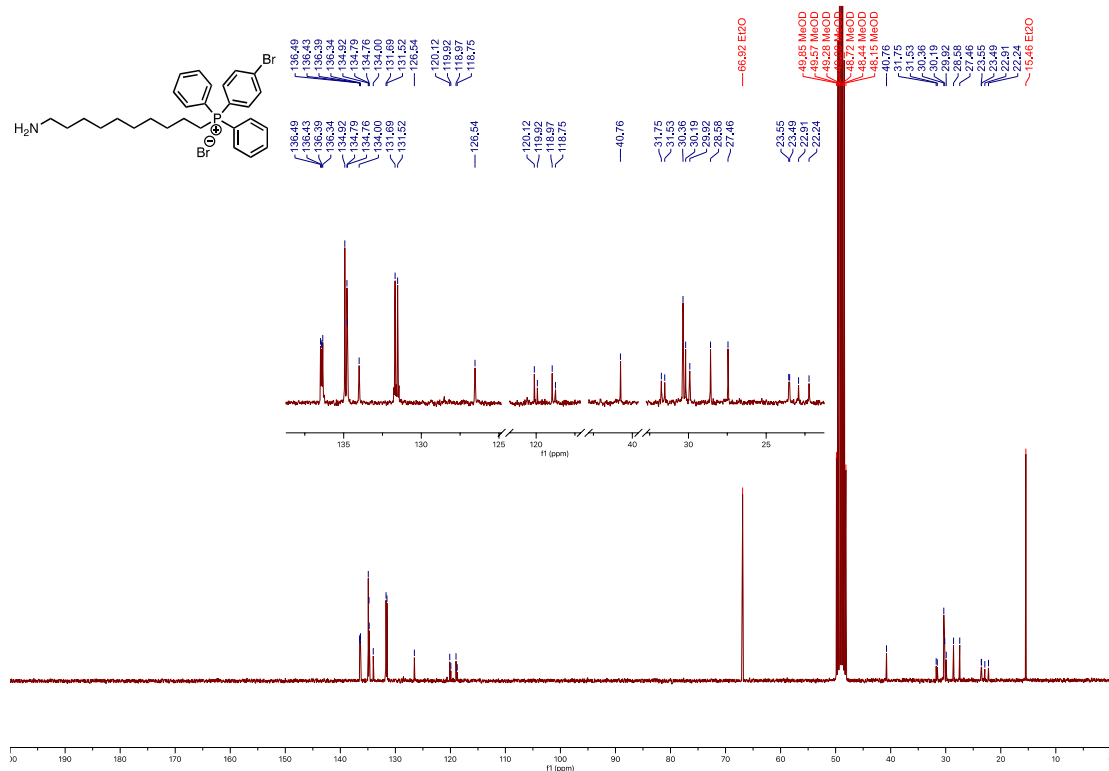

Figure S10 <sup>13</sup>C NMR of (4-bromophenyl)(10-(methylamino)decyl)diphenylphosphonium bromide hydrate

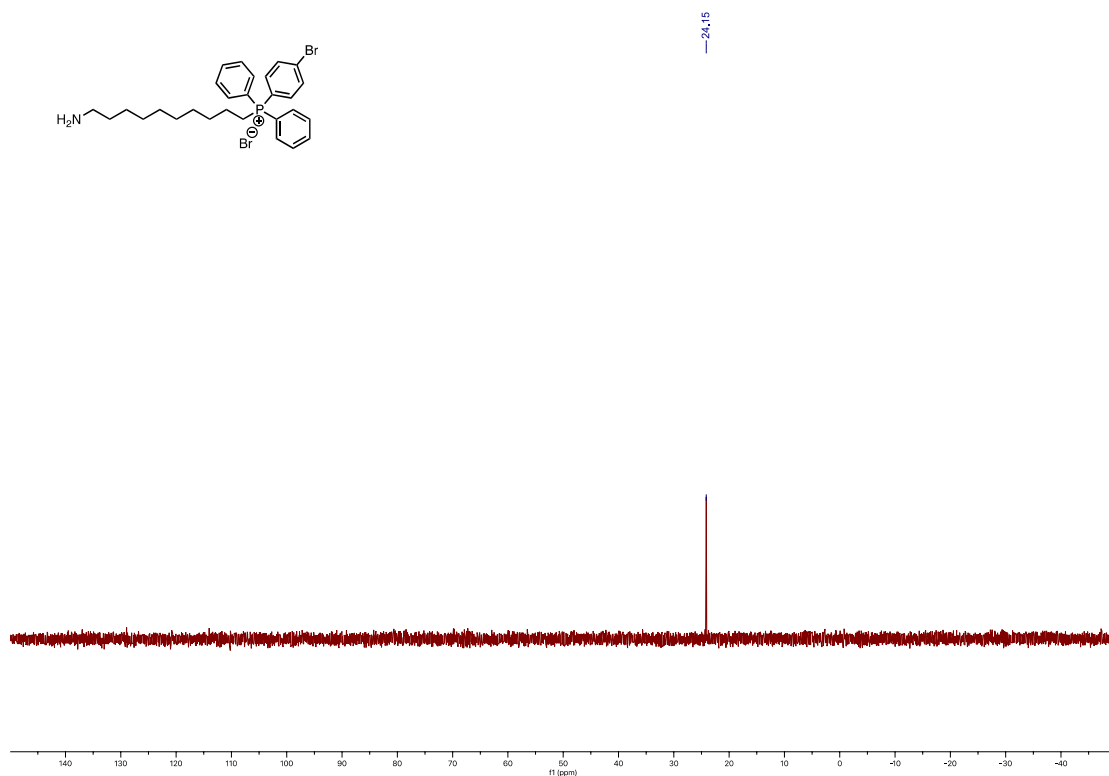

**Figure S11**  $^{31}\text{P}$  NMR of (4-bromophenyl)(10-(methylamino)decyl)diphenylphosphonium bromide hydrate

## 5) General experimental procedure.

High-resolution mass spectra were recorded on a Maxis IITM QTOF mass spectrometer (Bruker, Bellerica, MA, United States) with an electrospray ionization source. 1D and 2D NMR spectra were recorded on Bruker Avance III HD 400 MHz and 600 MHz spectrometers (Wissembourg, France) equipped with a BBFO Plus Smart probe and a triple resonance TCI cryoprobe, respectively (CNRS-MNHN). Preparative HPLC experiments were performed on an Agilent system and an Agilent PrepHT XDB-C18 column (21.2 × 150 mm i.d.; 5 μm; USA). Column chromatography (CC) was performed using 200g of silica gel (Geduran Si 60, 40–63 μm, Merck, Germany and Lichroprep RP-18, 40-63μm, Merck KGaA, Germany). Optical rotations  $[\alpha]_D^{20}$  were determined using a Anton Paar MCP 150 polarimeter. IR spectra were performed on a PerkinElmer BX FR-IR spectrometer and CD spectra finished Jasco J-810 spectropolarimeter system. UV spectra were recorded on Uvikon 9 X 3 W Bioserv.

The separation occurred onto the C18 Acclaim™ RSLC PolarAdvantage II column (2.1 × 100 mm, 2.2 μm of pore size; Thermo Fisher Scientific, United States) connected to a Dionex Ultimate 3000 HPLC system and coupled to a Maxis II™ QTOF mass spectrometer (Bruker, United States) with an electrospray ionization source. The mobile phases were water (0.1% formic acid) and acetonitrile (0.08% formic acid, solvent B) following a gradient of B at 10 to 100 in 15 min. The flow rate was set at 300 μL min<sup>-1</sup>. The MS parameters were 3.5 Kv of electrospray voltage, 35 psi of nebulizing gas (N<sub>2</sub>) pressure, drying gas (N<sub>2</sub>) flow rate of 8 L min<sup>-1</sup>, and 200°C of drying temperature. For the analysis of the vial with *T. flavus* crude extract mixed with probe 1, the mass spectra were recorded in the range of *m/z* 50-1500 in positive ion mode.

Single-crystal X-ray data for chlorobartaphilone A (4) were collected on a Rigaku mm007 HF rotating anode using CuKα radiation ( $\lambda = 1.54187 \text{ \AA}$ ) delivered through Osmic CMF confocal optics, and a Rapid II curved Image Plate detector. The data were recorded at 293 K. Data collection, cell refinement and

data reduction were performed with Fs\_process<sup>1</sup> software implemented within the Crystal Clear 2.0<sup>2</sup> suite. Absorption correction using equivalent reflections was performed with the AbsCorr option program<sup>2</sup>. All non-hydrogen atoms were refined anisotropically, and the hydrogen atoms were placed in idealized positions and refined as riding atoms isotropically with fixed individual displacement parameters [ $U_{iso}(H) = 1.2 U_{eq}(C_{sp^2} \text{ and } C_{ar})$  or  $1.5U_{eq}(C_{sp^3} \text{ or } O_{(hydroxyl)})$ ]. The absolute configuration of chlorobartaphilone A (C7 R) was determined unambiguously from the anomalous scattering by chloride at the copper wavelength using established methods<sup>3-5</sup>. X-ray crystallographic data in cif format are available at CCDC 2218370 and can be obtained free of charge via [www.ccdc.cam.ac.uk/data\\_request/cif](http://www.ccdc.cam.ac.uk/data_request/cif).

## 6) Fungal material.

The strains used for this study were *Talaromyces flavus* var. *flavus* (CBS 354.72B) and *Bartalinia robillardoides* (CBS 122686) obtained from the CBS collection. Precultures were obtained by seeding 3 cubes of agar covered with the mycelium *Talaromyces flavus* var. *flavus* or *Bartalinia robillardoides* on Malt Extract Agar (MEA) and incubated 8 days at 25 °C. Precultures were then scratched and sprayed with 100 mL of sterilized water, 1 mL of the mix was thus spread on 100 petri dishes and at 25°C for 10 days. The medium used for the culture was the same as for the preculture.

## 7) Protocol of the probe addition in *T. flavus* and *B. robillardoides* extracts.

A solution of probe 1 at 10 mg.mL<sup>-1</sup> in acetonitrile was prepared. 11.25 µL of the solution of probe 1 were added to a LC vial containing 188.75 µL of methanol. Then 50 µL of *Talaromyces flavus* crude extract (or *B. robillardoides* crude extract) at 50 mg.mL<sup>-1</sup> (in methanol) were added to the LC vial, and 6 µL were injected on the HPLC coupled with Tandem Mass Spectrometry. The separation was carried out using a C18 Acclaim™ RSLC PolarAdvantage II column (2.1 × 100 mm, 2.2 µm pore size; Thermo Fisher Scientific, United States) connected to a Dionex Ultimate 3000 HPLC system. The column was coupled to a Maxis 208 IITM QTOF mass spectrometer (Bruker, United States) equipped with an electrospray ionization source. The flow rate was set at 210 µL.min<sup>-1</sup>. The MS parameters were 3.5 kV of electrospray voltage, 35 psi of nebulizing gas (N<sub>2</sub>) pressure, drying gas (N<sub>2</sub>) flow rate of 8 L.min<sup>-1</sup>, and 200°C of drying temperature. The mobile phases were water (0.1% formic acid) and acetonitrile (0.1% formic acid, solvent B) following a gradient of Solvent B at 5, 50, 90, and 5% for 0, 9, 15, and 21 min, respectively. LC-MS/MS data were analyzed using DataAnalysis (version 4.4 Bruker Daltonik GmbH)

## 8) Detection of tagged compounds from *B. robillardoides* extract.

### Procedure for HaloSeeker.

LC-MS/MS data were converted to “.mzXML”. The software HaloSeeker was used to detect tagged compounds bearing a bromide. Samples with a crude extract/probe 1 ratio of 4.5% gave the best results and were used for analysis. For the peak picking the m/z tolerance = 5 ppm, s/n= 8, peakwidth = 5, 60 s, prefilter= 3-10 000, the m/z center function = wMean, no baseline check, no integration by CWT, noise= 0, m/z difference = 0.001. For the pairing tr tolerance= 1 s and m/z tolerance = 0.5 mDa. For the alignment tr and m/z tolerance = 1, the distance function = cor\_opt, response= 1, gap init = 0.3, gap extend= 2.4, factor diagonal = 2, no local alignment. For the fragment/adduct, the percentage of the width = 0.75, threshold for EIC correction = 0.75, method for grouping peaks=hcs, multiplier of the standard = 6, p-value threshold = 0.05.

To obtain the Figure 3 the display options were as followed: plot type =Halomap, X axis= RT (min), Y axis = IUPAC m/z, legend scheduling = Cluster ID, m/z range= 600-1500, tr range= 6-8 min, the most intense clusters =inf, pairing and ratio filter = F1.

Table S1 Overview of HaloSeeker results for probe 1

|          | Number of features | Number of clusters | Sum intensities |
|----------|--------------------|--------------------|-----------------|
| F1       | 151                | 48                 | 96,787,133      |
| filtered | 78                 | 21                 | 22,169,715      |

#### Procedure for Molecular Networking.

The LC-MS/MS data were preprocessed on MzMine 2.57. The MZmine workflow for probe 1 included the MS<sup>1</sup> detection algorithm with a noise level set to 1.0E3 and MS<sup>2</sup> to 1.0E1. Chromatogram building was performed including a minimum group size of 5, a group intensity threshold and minimum highest intensity of 1.0E1 and a *m/z* tolerance of 0.02. The filtering tool was used to keep only *m/z* = 800-1500. Data were then aligned with a *m/z* tolerance = 0.02, a weight for *m/z* and RT =1 and a retention time tolerance=1.0 min. The single file containing a .csv and a .mgf was analyzed by the Feature-Based-Molecular-Networking (FBMN) of the software Global Natural Products Social Molecular Networking (GNPS). Parameters used were: precursor ion mass tolerance and fragment ion mass tolerance = 0.02 Da, minimum pairs cosine =0.5, minimum matched fragment ions = 3.

#### 9) Detection of the tagged compounds from *T. flavus* extract.

Prior to MS/MS data processing, raw files of tagged metabolites and probe 1 were converted to the open format mzXML using the DataAnalysis tool "Export Chromatogram Analysis". Then the data were imported into the MZmine 2.57 software. The workflow included the MS<sup>1</sup> detection algorithm with a noise level set to 5.0E2 and MS<sup>2</sup> to 1.0E1. Chromatogram building was performed including a minimum group size of 5, a group intensity threshold and minimum highest intensity of 1.0E1 and a *m/z* tolerance of 0.02. The filtering tool was used to keep only *m/z* = 750-850. Data were then deisotoped and filtered with a retention time = 6.6-9.9 min and a height = 1.0E4-1.0E7. The single file containing .csv and .mgf was analyzed by GNPS (with Feature-Based Molecular Networking). Parameters used were: precursor ion mass tolerance and fragment ion mass tolerance = 0.02 Da, minimum pairs cosine = 0.5, minimum matched fragment ions =3.

#### 10) Extraction and isolation of compounds 2 and 3 from *T. flavus* crude extract.

For large scale culture, the fungus was grown in 3 square Petri dishes (45 mL) of Malt Extract Agar (MEA) at 25°C for 11 days. Then the mycelium was scratched and mixed to 60 mL of sterile water. 60 square Petri dishes were seeded with 1 mL of the water with mycelium and incubated for 11 days à 25°C. The cultivated agar was then cut in squares and extracted three times with ethyl acetate and the solvent was combined and dried to afford a crude extract of 1.215g. The crude extract was subjected to silica gel column chromatography with a dichloromethane-ethyl acetate (DCM- EtOAc) gradient system, 90:10, 30:70, then a DCM-methanol (MeOH) system 90:10, 70:30 and 0:100 to rinse the column yielding 6 fractions (F1-F6). F4 was purified by preparative HPLC at a flow rate of 10 mL/min (ACN-H<sub>2</sub>O+0.1%FA, 5:95 to 70:30 in 35 minutes) to yield 9 subfractions. F4F6 yielded the compound **3** (6.1 mg), F4F8 yielded the diazaphilonic acid **2** (44.7 mg). F3 was purified by preparative HPLC at a flow rate of 10 mL/min (ACN-H<sub>2</sub>O+0.1%FA, 5:95 to 70:30 in 35 minutes) to yield 8 fractions. F3F4 yielded 6-hydroxy-mitorubrinic acid (2.8 mg), F3F5 mitorubrinol (5.5 mg) and F3F6 mitorubrinic acid (32.2 mg).

#### 11) Extraction and isolation of compounds 4 and 5 from *B. robillardoides* crude extracts.

Precultures of MEA were obtained by seeding 3 cubes of agar covered with mycelium and incubating them 6 days at 25 °C. Precultures were then scratched and sprayed with 30 mL of sterilized water, 1 mL of the mix was thus sprayed on each of 30 erlenmeyers of solid rice medium (50g of rice and 100 mL of water), and incubated at 25°C for 20 days. Then, the 30 erlenmeyers were extracted three times with ethyl acetate by sonication (30 minutes each time). The solvent was evaporated under reduced

pressure to give a crude extract of 17,76 grams which was fractionated over a silica gel column (356 g), eluted successively with DCM, then DCM/EtOAc (9:1), followed by DCM/EtOAc (5:5) and rinsed with MeOH to afford 8 fractions. The fraction 5 (1.08g) was purified by preparative HPLC (10 mL/min, A: water+ 0.1% formic acid, B: acetonitrile, gradient: 5 to 20% for 4 min and 20 to 95% of B for 24 min) yielding 8 fractions. The subfraction F5F3 (4.8 mg) corresponded to chlorobartaphilone A (4). The subfraction F5F6 (10.1 mg) corresponded to 8-11-didehydrochermesinone B. The fraction 6 (1.991 g) was purified by preparative HPLC (10 mL/min, A: water+ 0.1% formic acid, B: acetonitrile, gradient: 5 to 20% for 4 min and 20 to 95% of B for 24 min) yielding 13 fractions. The subfraction F6F10 (80.6 mg) corresponded to chermesinone A. The subfraction F6F7 (249.3 mg) was purified by preparative silica TLC with DCM/MeOH (95:5) yielding 4 subfractions. The subfraction F6F7F3 (4.0 mg) corresponded chloro-hydroxy-chermesinone A (5). The subfraction F6F9 (61.6 mg) was purified by a second preparative HPLC (10 mL/min, A: water+ 0.1% formic acid, B: acetonitrile, gradient: 5 to 50% for 4 min, 50 to 60% of B for 14 min and 60 to 95% for 3 min) yielding 5 fractions. The subfraction F6F9F3 corresponded to colletotrichone A.

## 12) Spectroscopic data

**Diazaphilonic acid (2).** IR  $\nu_{\max}$ : 3360, 1720, 1640, 1520, 1440, 1320, 1240, 1160, 1080, 1000, 880  $\text{cm}^{-1}$ ; UV (MeOH):  $\lambda_{\max}$  ( $\log \epsilon$ ) 216 nm (4.93), 268 nm (4.61), 325 nm (4.62); HRMS (ESI-TOF)  $m/z$  : 825.1668  $[\text{M}+\text{H}]^+$  Calcd for  $[\text{C}_{42}\text{H}_{32}\text{O}_{18} + \text{H}]^+$ ; Found 825.1663.  $\alpha_{\text{D}}$ : -261.5 ( $c$  0.54,  $\text{CH}_3\text{OH}$ )

**Pavesiflonic acid (3).** IR  $\nu_{\max}$ : 3360, 2880, 1760, 1720, 1680, 1618, 1440, 1320, 1240, 1200, 1160, 1080, 840  $\text{cm}^{-1}$ ; UV (MeOH):  $\lambda_{\max}$  ( $\log \epsilon$ ) 206 nm (4.29), 265 nm (3.93), 305 nm (3.78); HRMS (ESI-TOF)  $m/z$  : 811.1874  $[\text{M}+\text{H}]^+$  Calcd for  $[\text{C}_{42}\text{H}_{34}\text{O}_{17} + \text{H}]^+$ ; Found 811.1865.  $\alpha_{\text{D}}$ : -95 ( $c$  0.24,  $\text{CH}_3\text{OH}$ )

**Chlorobartaphilone A (4).** IR  $\nu_{\max}$ : 3443, 2106, 1647  $\text{cm}^{-1}$ ; UV (MeOH):  $\lambda_{\max}$  ( $\log \epsilon$ ) 348 (2.69), 260 (2.75); HRMS (ESI-TOF)  $m/z$  : 265.0262  $[\text{M}+\text{H}]^+$  Calcd for  $[\text{C}_{13}\text{H}_9\text{ClO}_4 + \text{H}]^+$ ; Found 265.0263.  $[\alpha]_{\text{D}}^{-10}$  ( $c$  0.5,  $\text{CH}_3\text{OH}$ ). Crystallographic data:  $\text{C}_{13}\text{H}_9\text{ClO}_4$  ( $M = 264.65$  g/mol): monoclinic, space group  $\text{P2}_{1,a}$  = 5.3067(4) Å,  $b = 9.1631(7)$  Å,  $c = 12.2106(9)$  Å,  $\alpha = 90^\circ$ ,  $\beta = 99.671(7)^\circ$ ,  $\gamma = 90^\circ$ ,  $V = 585.31(8)$  Å<sup>3</sup>,  $Z = 2$ ,  $T = 293(2)$  K,  $\mu(\text{CuK}\alpha) = 2.949$   $\text{mm}^{-1}$ ,  $F(000) = 272$ , crystal size = 0.29 x 0.08 x 0.03  $\text{mm}^3$ ,  $\rho_{\text{calc}} = 1.502$   $\text{g}/\text{cm}^3$ ; out of the 6690 reflections measured ( $3.67^\circ \leq \theta \leq 68.2^\circ$ ), 2096 were unique ( $R_{\text{int}} = 0.0438$ ,  $R_{\text{sigma}} = 0.058$ ) and were used in all calculations. The final  $R_1$  was 0.0381 ( $I > 2\sigma(I)$ ), and  $wR_2$  was 0.1159 (all data). Flack parameter (using 520 quotients  $\{(|^+|-|^-|)/(|^+|+|^-|)\} = 0.016$  (9).

**Chloro-hydroxy-chermesinone A (5).** IR  $\nu_{\max}$ : 3395, 2095, 1641, 1015  $\text{cm}^{-1}$ ; UV (MeOH):  $\lambda_{\max}$  ( $\log \epsilon$ ) 352 (1.75); HRMS (ESI-TOF)  $m/z$  : 341.1150  $[\text{M}+\text{H}]^+$  Calcd for  $[\text{C}_{17}\text{H}_{21}\text{ClO}_5 + \text{H}]^+$ ; Found 341.1149.  $[\alpha]_{\text{D}}^{+3}$  ( $c$  0.5,  $\text{CH}_3\text{OH}$ )

### 13) NMR characterization of compounds (2-5)

*Table S2 2D NMR spectrum (600 MHz) of diazaphilonic acid (2) (acetone-d<sub>6</sub>) and pavesiflonic acid (3) (acetonitrile-d<sub>3</sub>)*

| Position | Diazaphilonic acid (2) |                                        | Pavesiflonic acid (3) |                                              |
|----------|------------------------|----------------------------------------|-----------------------|----------------------------------------------|
|          | $\delta_C$ , type      | $\delta_H$ , multi ( <i>J</i> in Hz)   | $\delta_C$ , type     | $\delta_H$ , multi ( <i>J</i> in Hz)         |
| 1        | 154.1, CH              | 8.18, s                                | 154.4, C              | 7.99, d (1.1)                                |
| 2        | -                      |                                        | -                     |                                              |
| 3        | 159.0, C               |                                        | 160.5, C              |                                              |
| 4        | 111.6, C               |                                        | 114.5, C              |                                              |
| 5        | 142.2, C               |                                        | 143.9, C              |                                              |
| 6        | 105.3, CH              | 5.60, brs                              | 105.1, CH             | 5.83, s                                      |
| 7        | 192.1, C               |                                        | 192.6, C              |                                              |
| 8        | 86.2, C                |                                        | 86.5, C               |                                              |
| 9        | 193.0, C               |                                        | 193.9, C              |                                              |
| 10       | 116.2, C               |                                        | 116.2, C              |                                              |
| 11       | 22.7, CH <sub>3</sub>  | 1.65, s                                | 22.9, CH <sub>3</sub> | 1.62, s                                      |
| 12       | 26.3, CH <sub>2</sub>  | 2.92, d (19.2)<br>3.29, dd (19.2, 7.9) | 30.8, CH <sub>2</sub> | 3.00, dd (19.8, 7.5)<br>2.59, m              |
| 13       | 38.0, CH               | 3.65, d (7.7)                          | 28.8, CH              | 2.66, m                                      |
| 14       | 173.4, C               |                                        | 70.2, CH <sub>2</sub> | 4.01, dd (11.5, 1.5)<br>3.77, dd (11.5, 1.5) |
| 1a       | 155.5, CH              | 8.12, s                                | 157.3, CH             | 7.80, d (1.3)                                |
| 2a       | -                      |                                        | -                     |                                              |
| 3a       | 158.6, C               |                                        | 103.5, C              |                                              |
| 4a       | 111.8, CH              | 6.57, s                                | 36.6, CH <sub>2</sub> | 3.04, dd (16.5, 2.1)<br>2.82, d (16.5)       |
| 5a       | 143.2, C               |                                        | 146.7, C              |                                              |
| 6a       | 108.4, CH              | 5.54, brs                              | 119.4, CH             | 5.81, t (1.3)                                |
| 7a       | 192.4, C               |                                        | 193.8, C              |                                              |
| 8a       | 86.5, C                |                                        | 86.7, C               |                                              |
| 9a       | 193.1, C               |                                        | 192.6, C              |                                              |
| 10a      | 115.8, C               |                                        | 112.7, C              |                                              |
| 11a      | 22.6, CH <sub>3</sub>  | 1.62, s                                | 22.9, CH <sub>3</sub> | 1.59, s                                      |
| 12a      | 39.4, C                | 4.39, s                                | 37.1, CH              | 3.67, dd (3.2, 1.4)                          |
| 13a      | 43.5, CH               | 3.96, s                                | 39.2, CH              | 3.61, dd (3.2, 2.3)                          |
| 14a      | 172.7, C               |                                        | 172.7, C              |                                              |
| 1'       | 104.7, C               |                                        | 105.1, C              |                                              |
| 2'       | 166.1, C               |                                        | 166.0, C              |                                              |
| 3'       | 101.6, CH              | 6.21, d (2.2)                          | 101.7, CH             | 6.21, d (2.4)                                |
| 4'       | 163.9, C               |                                        | 163.6, C              |                                              |
| 5'       | 112.6, CH              | 6.33, m                                | 112.7, CH             | 6.31, m                                      |
| 6'       | 144.7, C               |                                        | 145.1, C              |                                              |
| 7'       | 24.0, CH <sub>3</sub>  | 2.58, s                                | 24.0, CH <sub>3</sub> | 2.58, s                                      |
| 8'       | 170.3, C               |                                        | 170.6, C              |                                              |
| 1a'      | 104.7, C               |                                        | 104.9, C              |                                              |
| 2a'      | 166.1, C               |                                        | 166.0, C              |                                              |

|     |                       |               |                       |               |
|-----|-----------------------|---------------|-----------------------|---------------|
| 3a' | 101.6, CH             | 6.21, d (2.2) | 101.7, CH             | 6.20, d (2.4) |
| 4a' | 163.9, C              |               | 163.6, C              |               |
| 5a' | 112.6, CH             | 6.33, m       | 112.7, CH             | 6.31, m       |
| 6a' | 144.7, C              |               | 145.2, C              |               |
| 7a' | 24.0, CH <sub>3</sub> | 2.57, s       | 24.0, CH <sub>3</sub> | 2.57, s       |
| 8a' | 170.3, C              |               | 170.5, C              |               |
| OH  |                       | 10.65, brs    |                       | 10.59, brs    |
| OH  |                       | 10.71, brs    |                       | 10.72, brs    |

**Table S3** NMR Spectroscopic data (600 MHz, acetone-*d*<sub>6</sub>) for chlorobartaphilone A (**4**) and chloro-16-hydroxy-chermesinone A (**5**)

| Position | Chlorobartaphilone A ( <b>4</b> ) |            |                      | Chloro-16-hydroxy-chermesinone A ( <b>5</b> ) |            |                                  |
|----------|-----------------------------------|------------|----------------------|-----------------------------------------------|------------|----------------------------------|
|          | $\delta_C$                        | $\delta_H$ | J(Hz)                | $\delta_C$                                    | $\delta_H$ | J(Hz)                            |
| 1        | 150.9, CH                         | 8.20       | d, ( <i>J</i> = 1.0) | 145.2, CH                                     | 7.11       | d, ( <i>J</i> = 1.7)             |
| 3        | 160.2, C                          |            |                      | 164.3, C                                      |            |                                  |
| 4        | 108.6, CH                         | 6.40       | s                    | 102.7, CH                                     | 6.74       | brs                              |
| 5        | 144.1, C                          |            |                      | 142.6, C                                      |            |                                  |
| 6        | 105.8, CH                         | 5.26       | d, ( <i>J</i> = 1.0) | 109.3, C                                      |            |                                  |
| 7        | 189.8, C                          |            |                      | 192.3, C                                      |            |                                  |
| 8        | 87.4, C                           |            |                      | 75.0, C                                       |            |                                  |
| 9        | 153.1, C                          |            |                      | 41.3, CH                                      | 3.31       | dt ( <i>J</i> = 9.5, 2.4)        |
| 10       | 111.4, C                          |            |                      | 120.8, C                                      |            |                                  |
| 11       | 115.7, C                          |            |                      | 38.1, CH <sub>2</sub>                         | 3.15       | dd ( <i>J</i> = 18.1, 2.4)       |
|          |                                   |            |                      |                                               | 2.94       | dd ( <i>J</i> = 18.1, 9.5)       |
| 12       | 166.6, C                          |            |                      | 212.8, C                                      |            |                                  |
| 13       | 26.0, CH <sub>3</sub>             | 1.63       | s                    | 48.5, CH                                      | 2.67       | sext ( <i>J</i> = 7.0)           |
| 14       | 19.4, CH <sub>3</sub>             | 2.25       | d ( <i>J</i> = 1.0)  | 26.5, CH <sub>2</sub>                         | 1.74       | dqd ( <i>J</i> = 14.6, 7.4, 7.0) |
|          |                                   |            |                      |                                               | 1.39       | dqd ( <i>J</i> = 14.6, 7.4, 7.0) |
| 15       |                                   |            |                      | 12.0, CH <sub>3</sub>                         | 0.88       | t ( <i>J</i> = 7.4)              |
| 16       |                                   |            |                      | 61.2, CH <sub>2</sub>                         | 4.42       | d ( <i>J</i> = 6.5)              |
| 17       |                                   |            |                      | 21.4, CH <sub>3</sub>                         | 1.11       | s                                |
| 18       |                                   |            |                      | 16.3, CH <sub>3</sub>                         | 1.09       | d ( <i>J</i> = 7.0)              |
| OH       |                                   |            |                      |                                               | 2.82       | s                                |

## 14) NMR spectra of compounds (2-5)

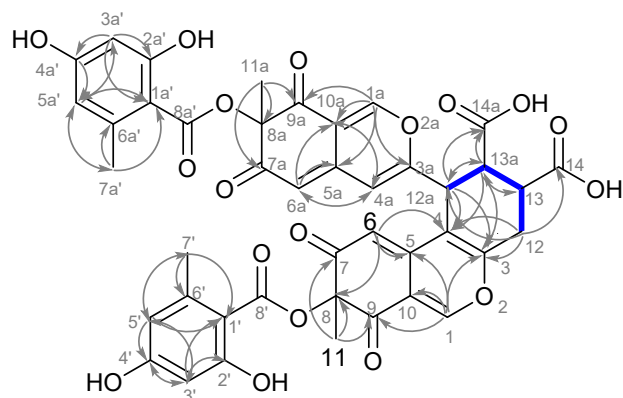

Figure S12 Key HMBC (arrows) and COSY (blue bold) correlations for diazaphilonic acid (2)

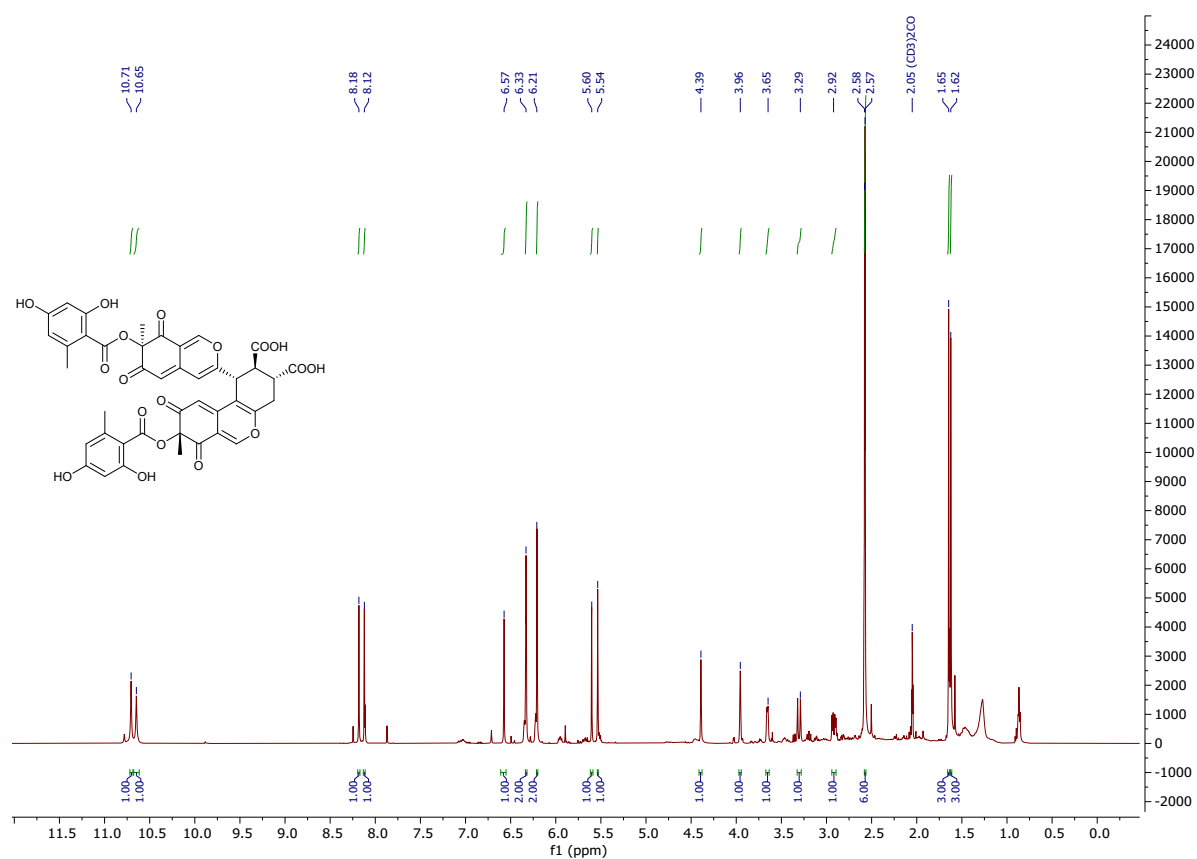

Figure S13  $^1\text{H}$  NMR spectrum (600 MHz, acetone- $d_6$ ) of diazaphilonic acid (2)



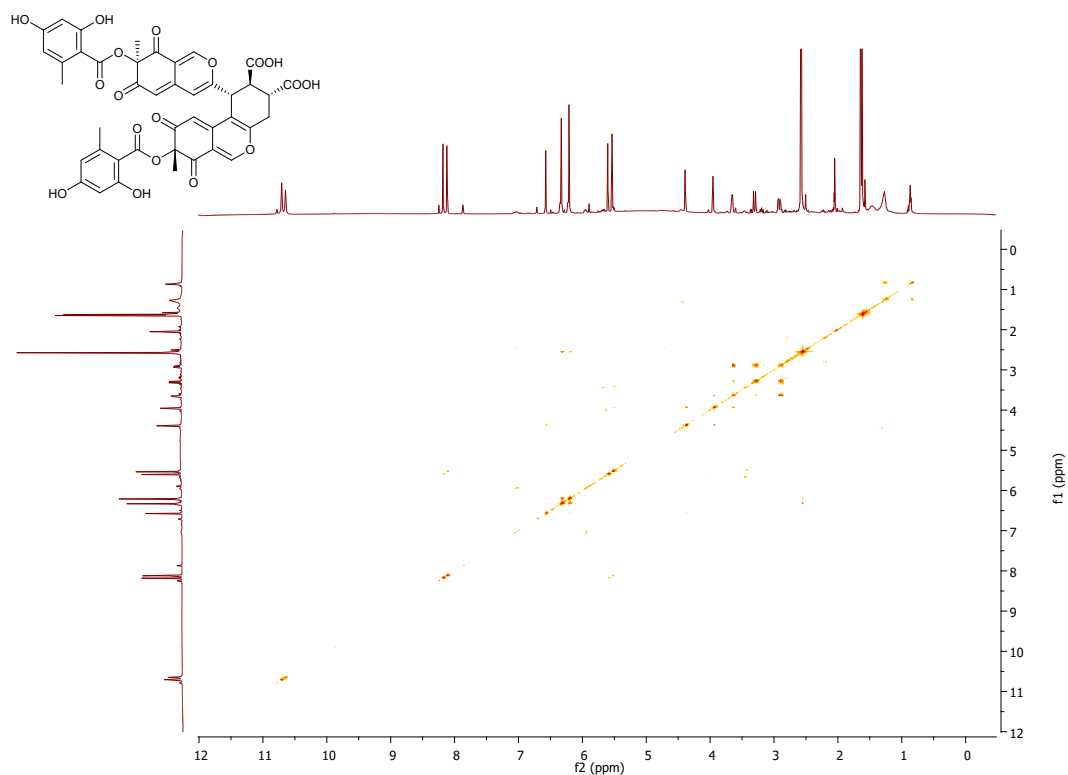

**Figure S14** COSY NMR spectrum (600 MHz, acetone- $d_6$ ) of diazaphilonic acid (2)

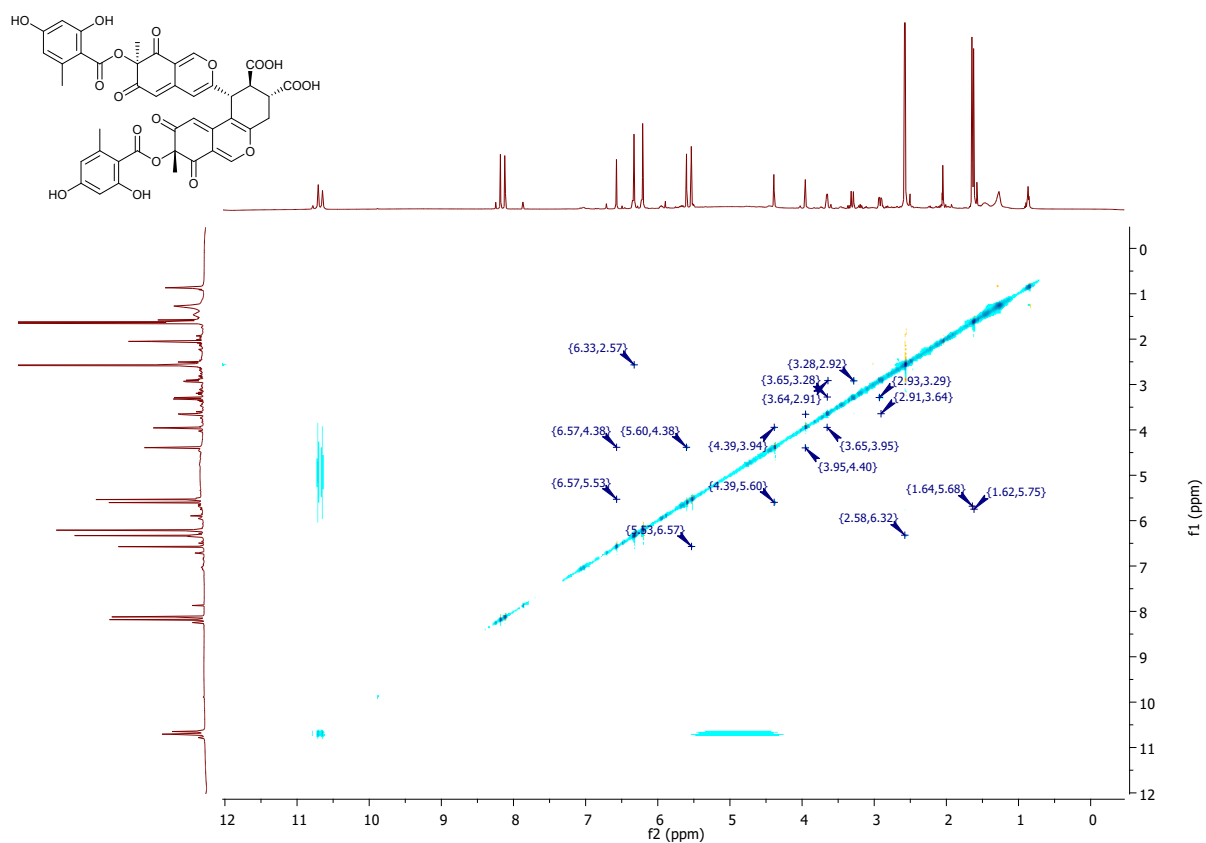

**Figure S15** NOESY NMR spectrum (600 MHz, acetone- $d_6$ ) of diazaphilonic acid (2)

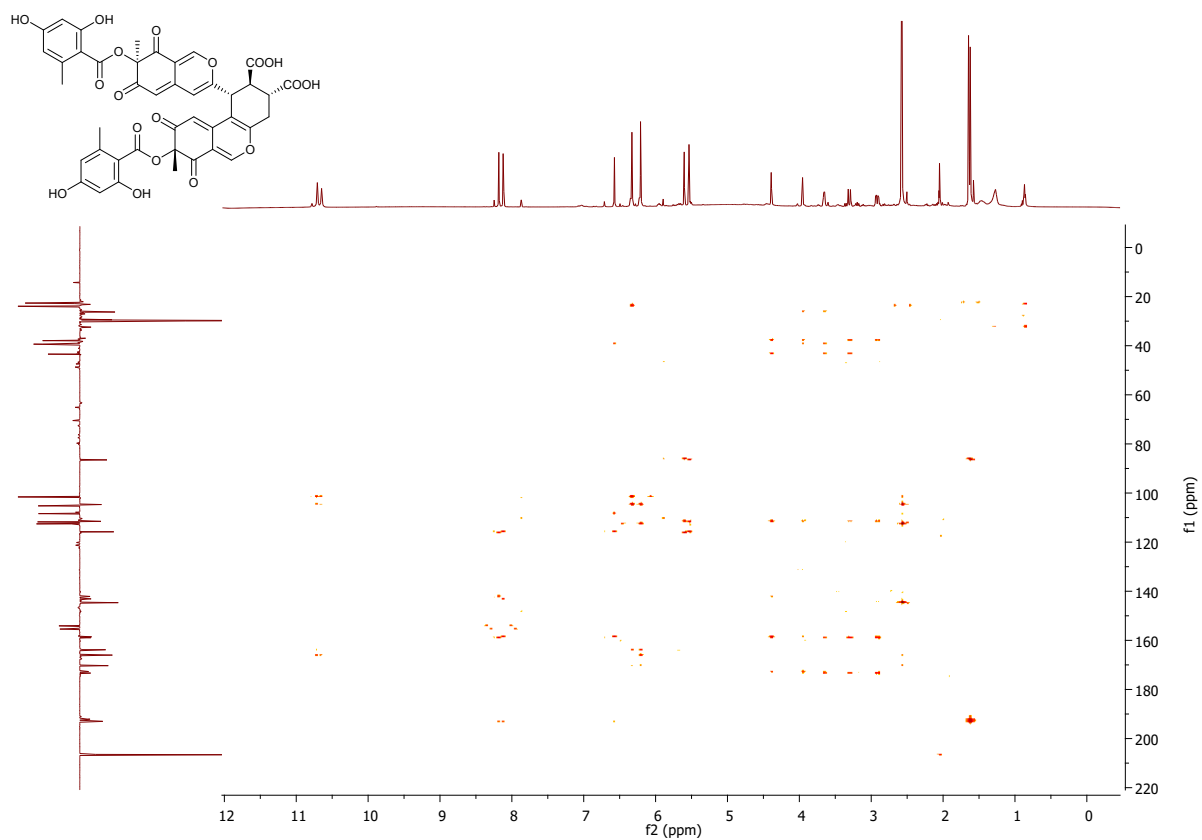

Figure S16. HMBC NMR spectrum (600 MHz, acetone-d<sub>6</sub>) of diazaphilonic acid (2)

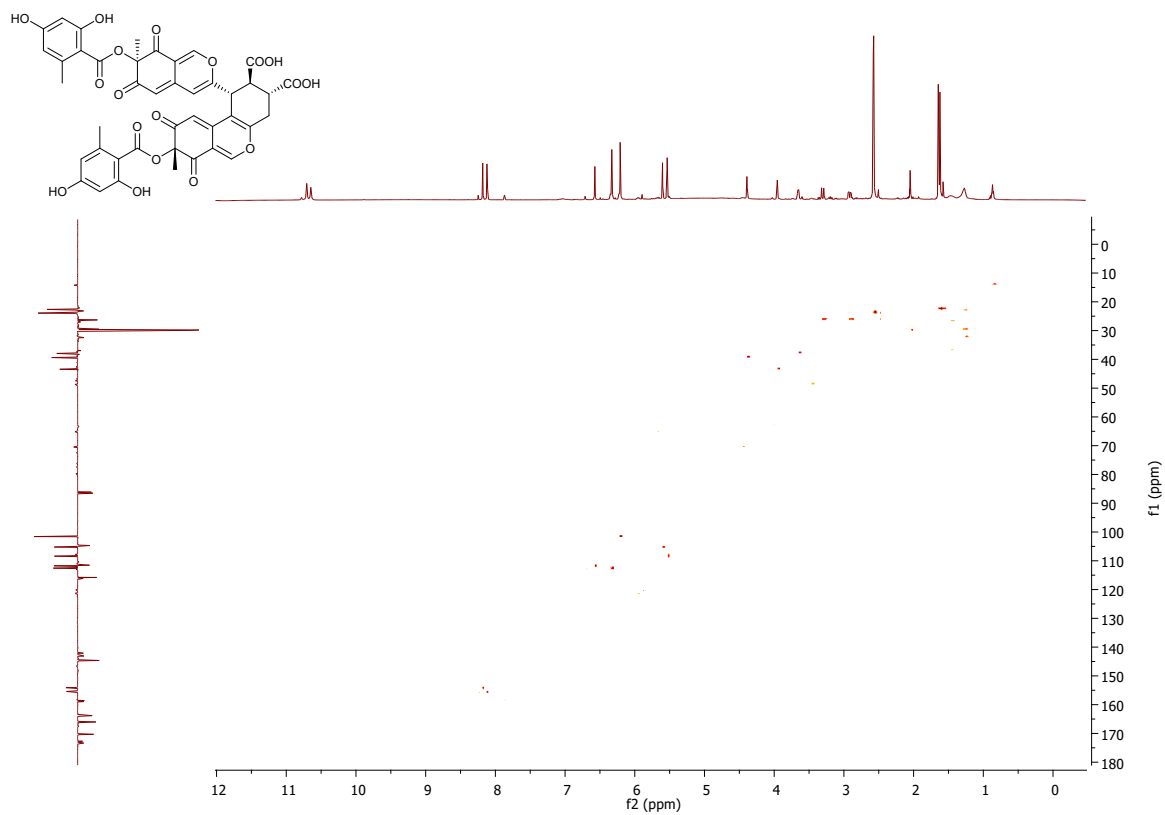

Figure S17. HSQC NMR spectrum (600 MHz, acetone-d<sub>6</sub>) of diazaphilonic acid (2)

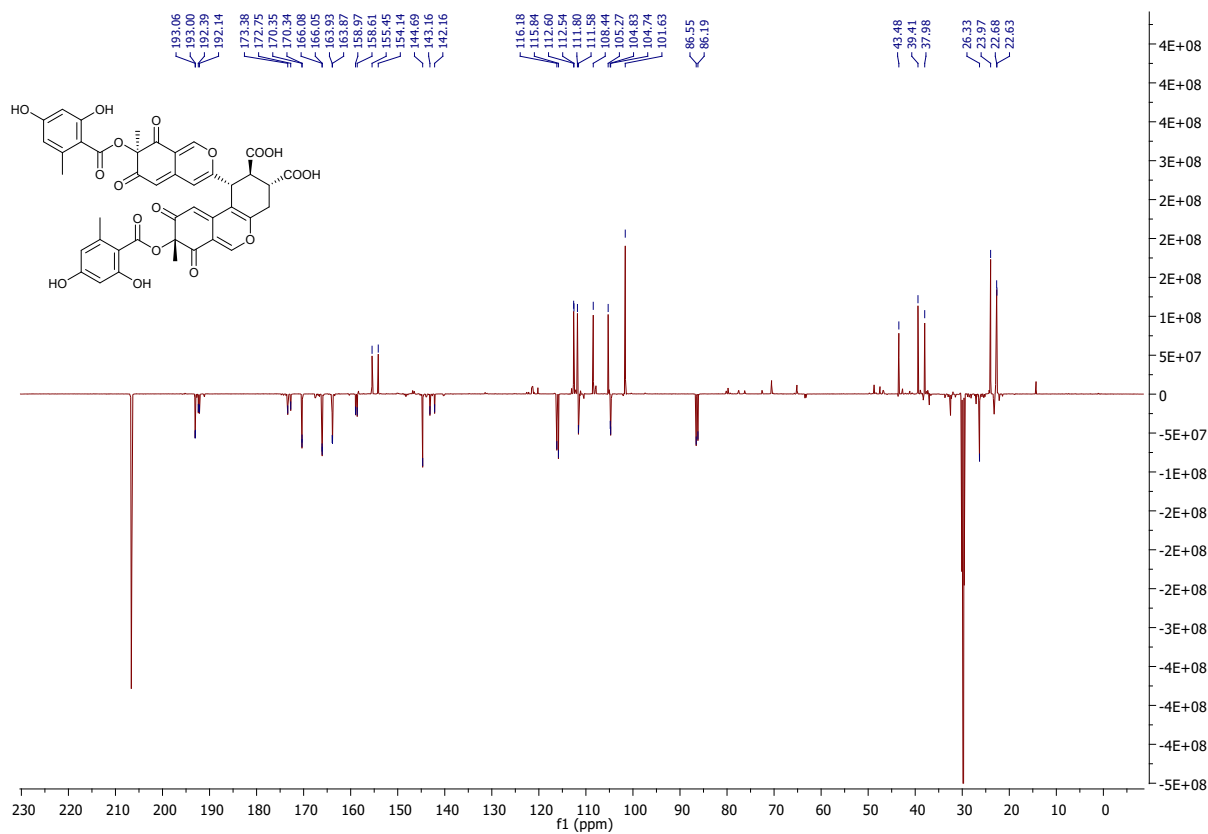

Figure S18. DEPTQ NMR spectrum (600 MHz, acetone- $d_6$ ) of diazaphilonic acid (2)

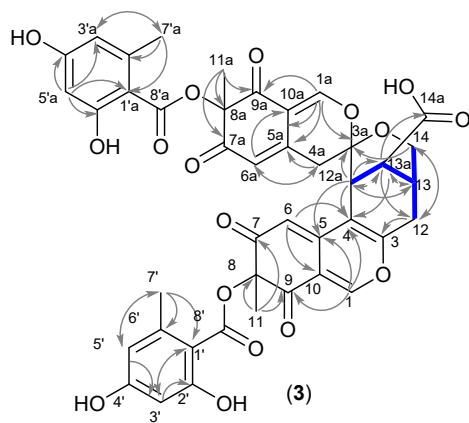

Figure S19. Key HMBC (grey arrows), COSY (bold) and NOESY (dashed black arrows) correlations for pavesiflonic acid (3)

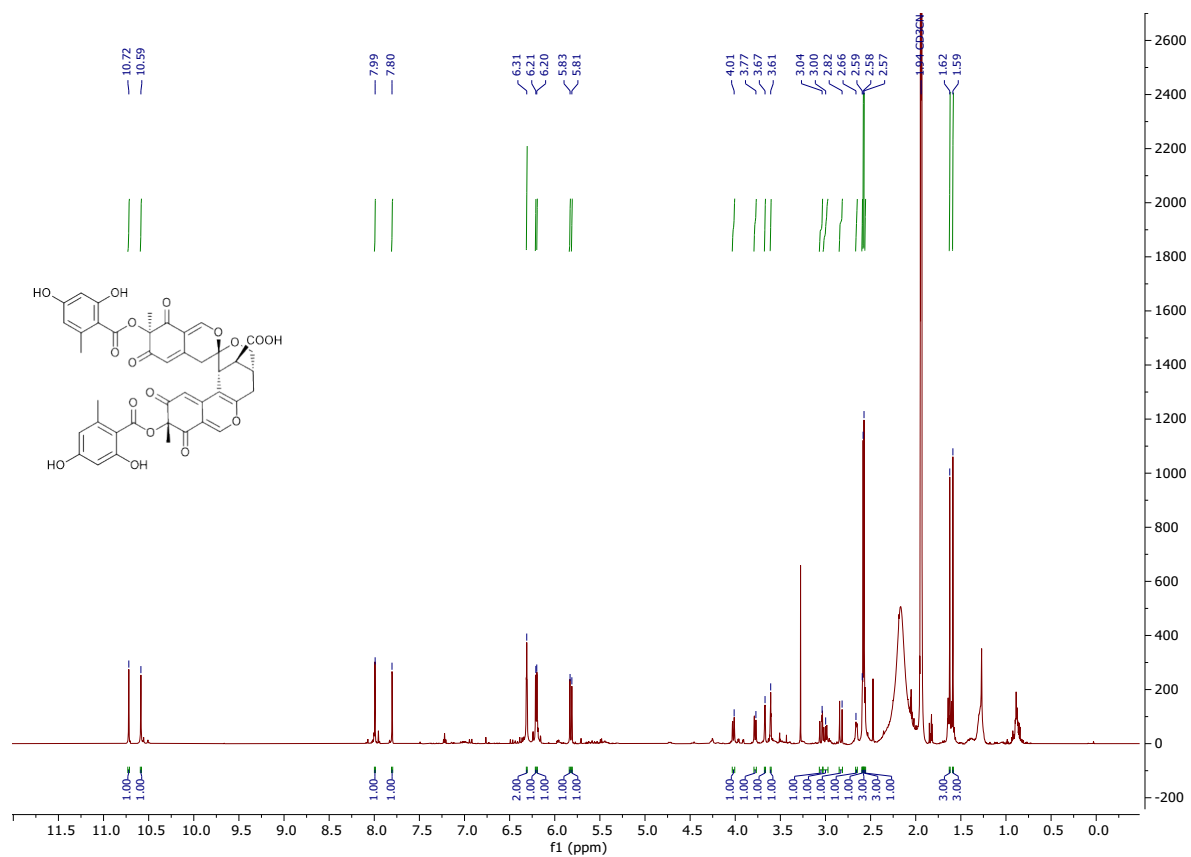

Figure S20.  $^1\text{H}$  NMR of pavesiflonic acid (3) in acetonitrile- $d_3$  (600MHz)

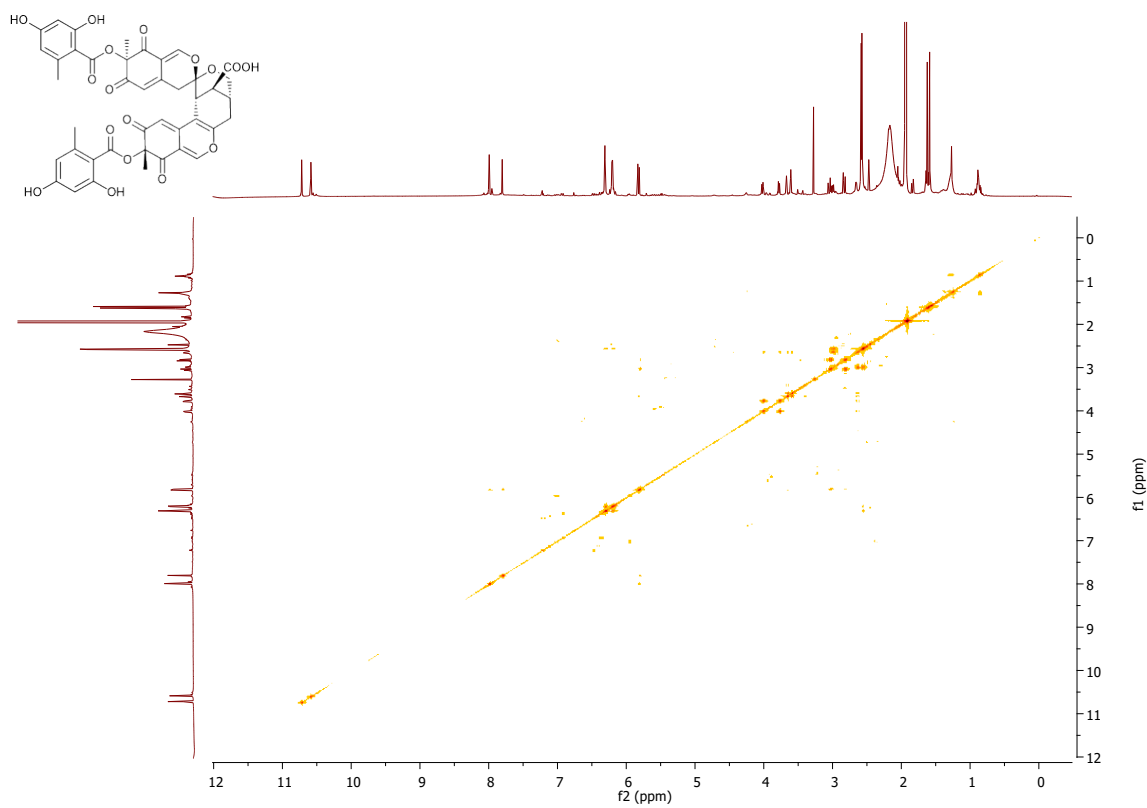

Figure S21. COSY of pavesiflonic acid (3) in acetonitrile- $d_3$  (600MHz)

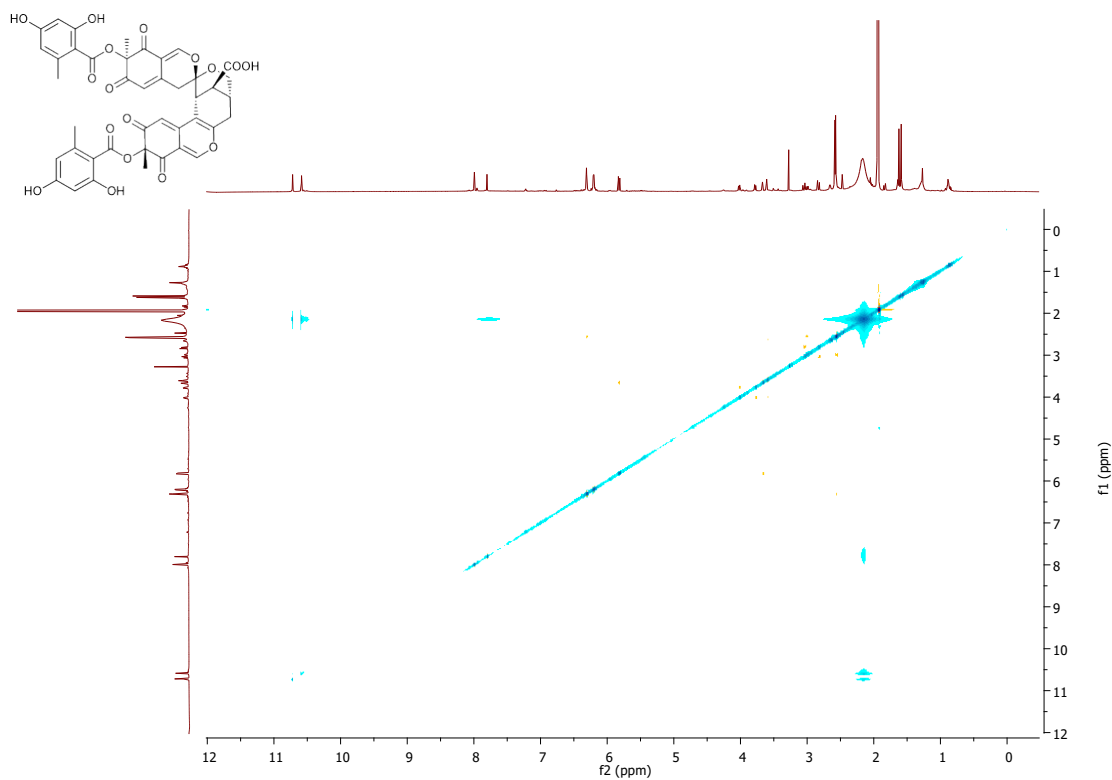

Figure S22. NOESY of pavesiflonic acid (3) in acetonitrile- $d_3$  (600MHz)

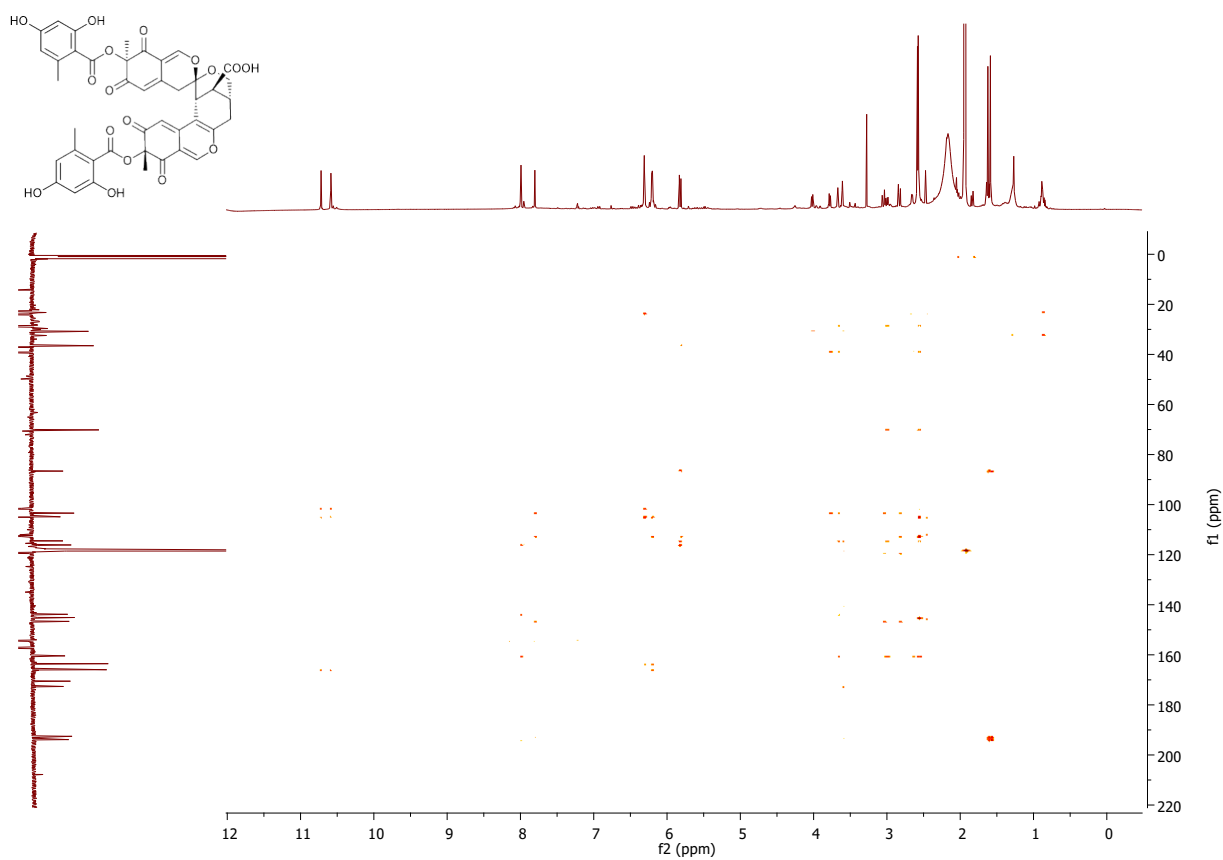

Figure S23. HMBC of pavesiflonic acid (3) in acetonitrile- $d_3$  (600MHz)

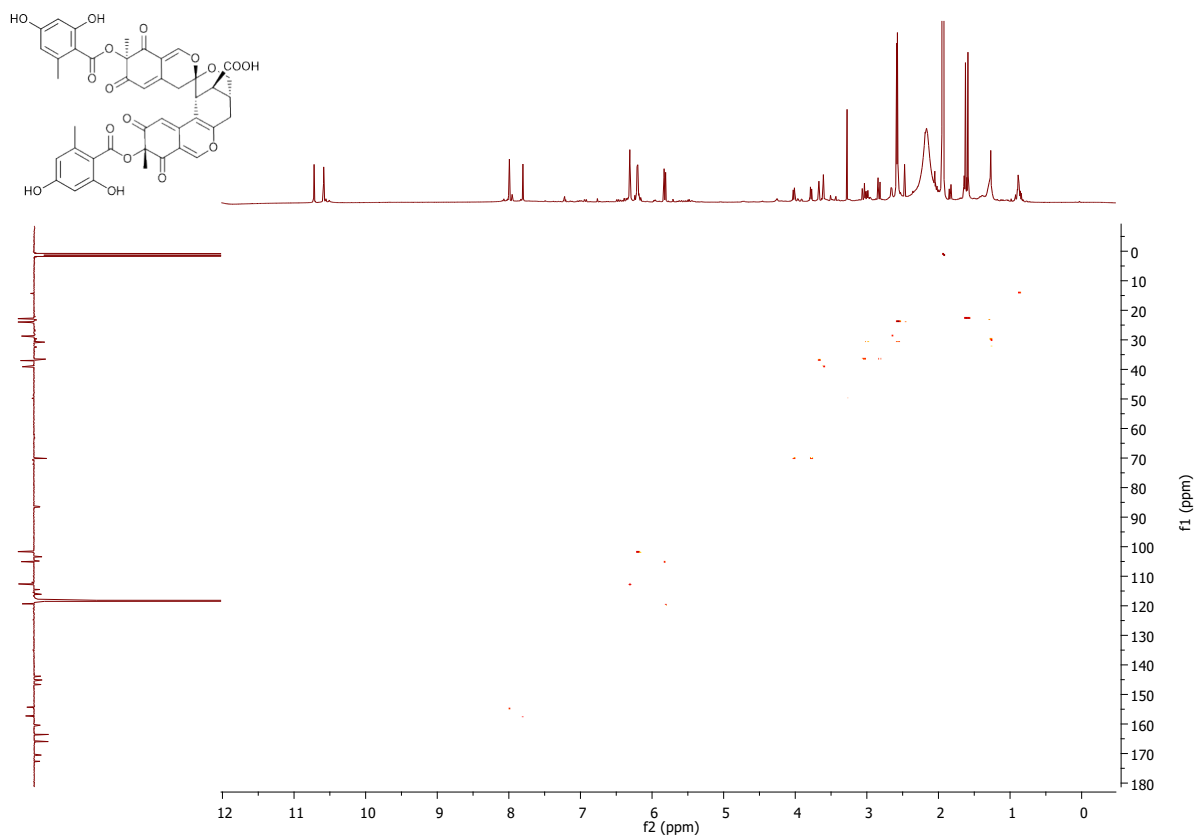

Figure S24. HSQC of pavesiflonic acid (3) in acetonitrile- $d_3$  (600MHz)

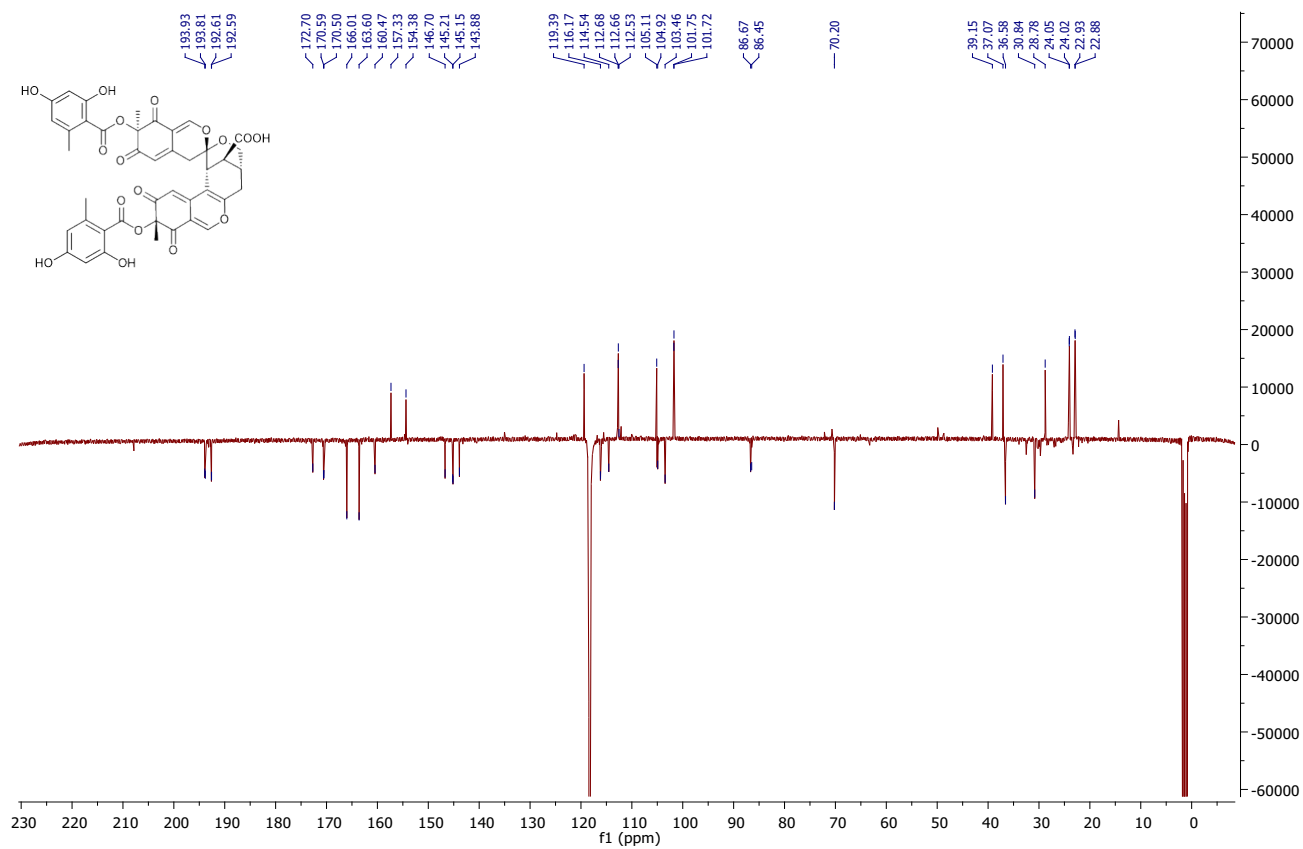

Figure S25. DEPT Q of pavesiflonic acid (3) in acetonitrile- $d_3$  (600MHz)

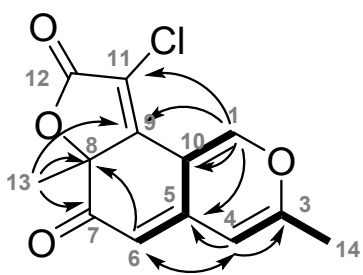

*Figure S26. COSY correlations (bold bond) and HMBC correlations (arrows) of compound 4.*

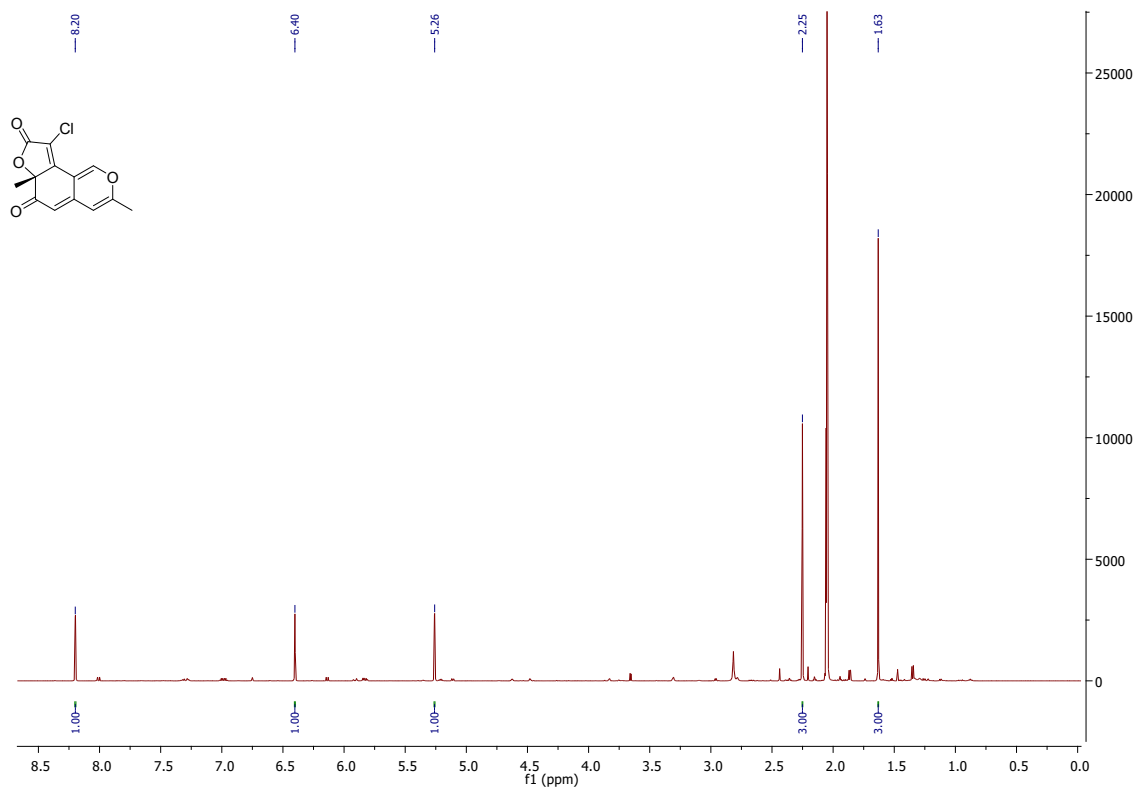

Figure S27.  $^1\text{H NMR}$  of compound 4 (600 MHz, acetone- $d_6$ )

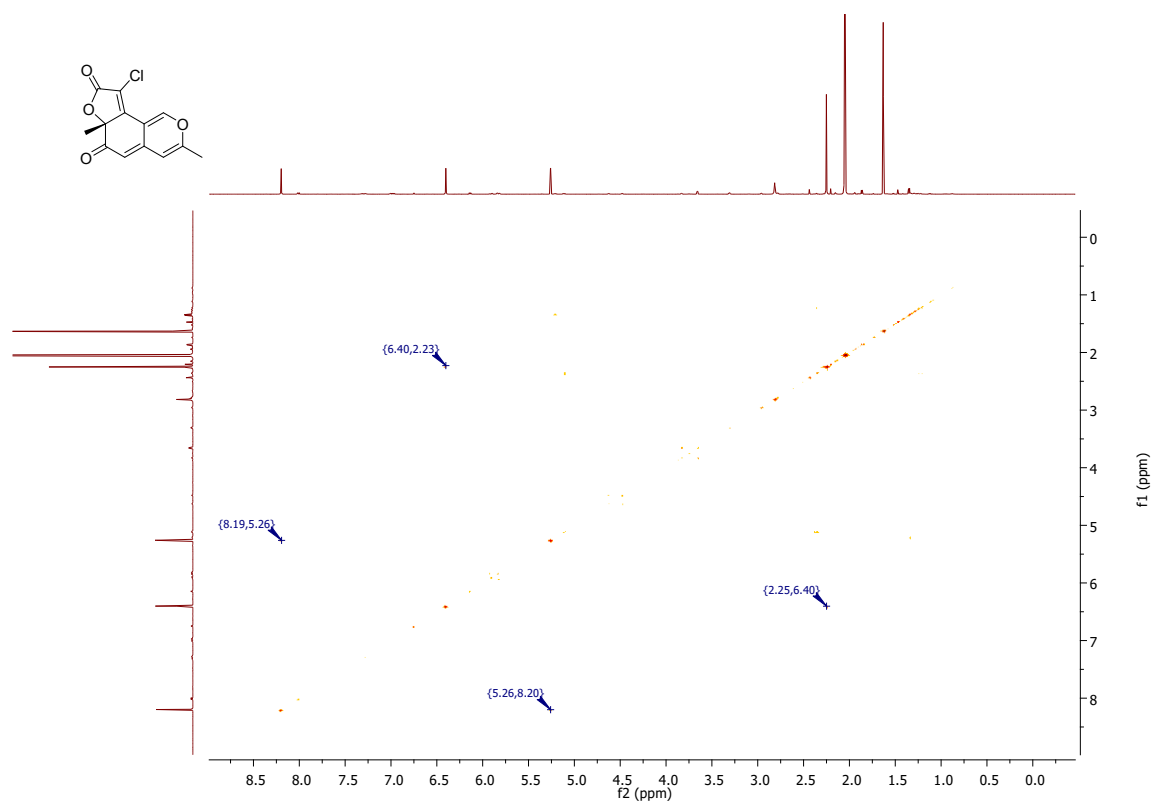

Figure S28. COSY NMR of compound 4 (600 MHz, acetone- $d_6$ )



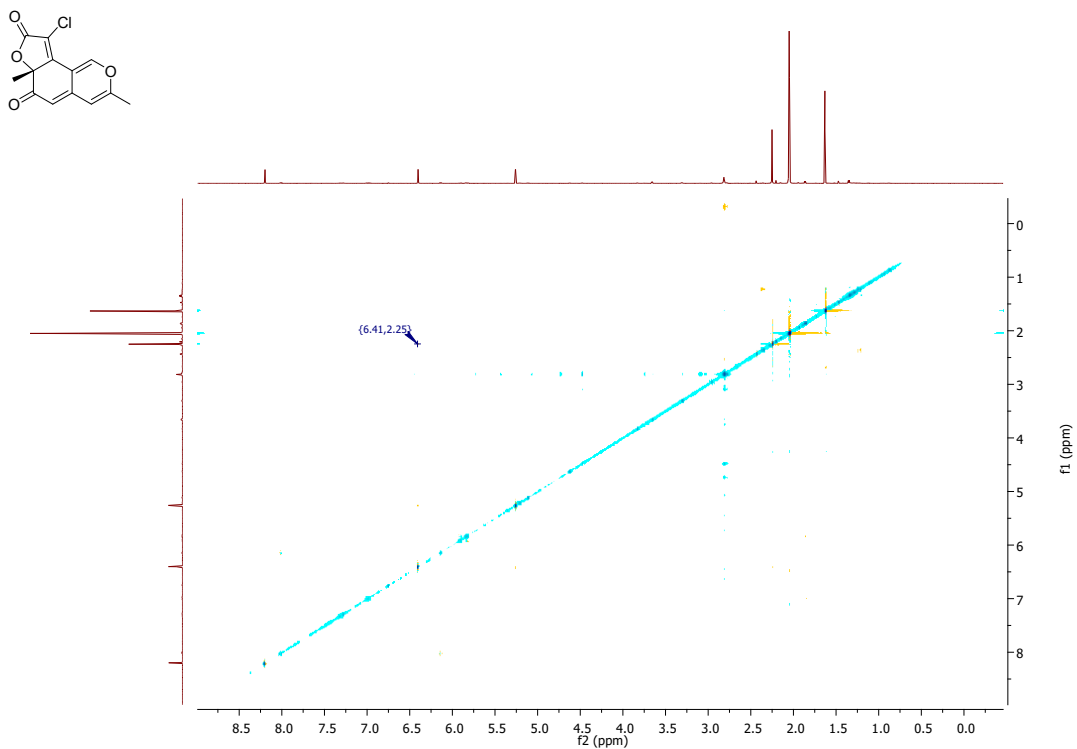

Figure S29. NOESY NMR of compound 4 (600 MHz, acetone-*d*<sub>6</sub>)

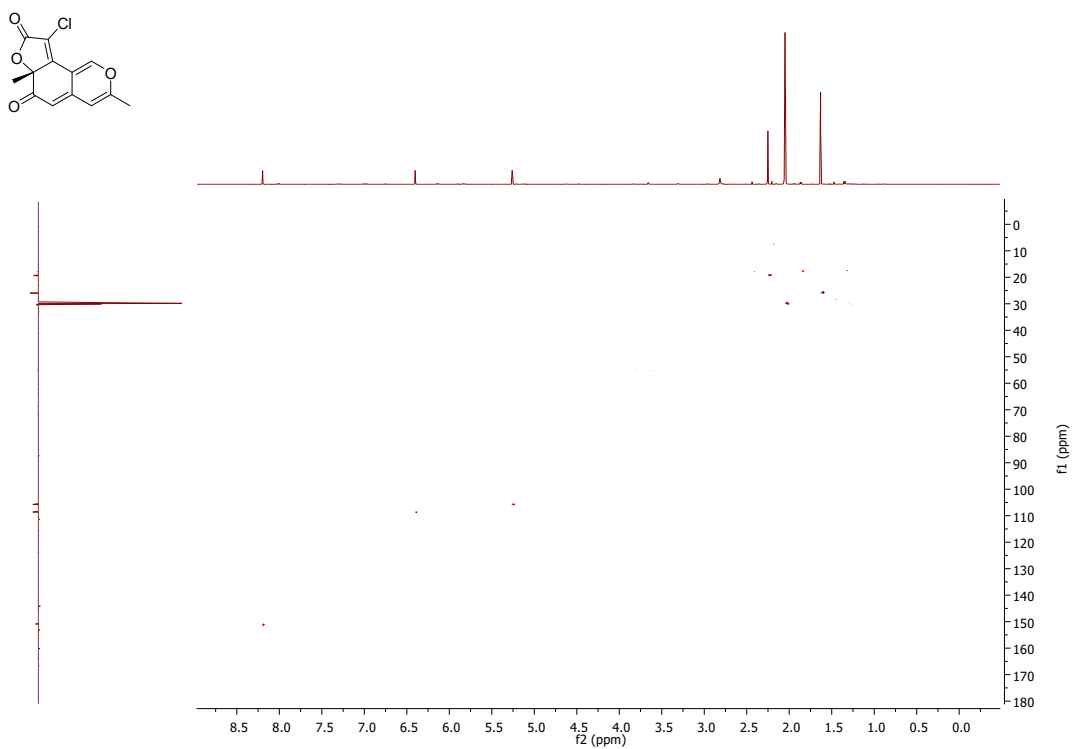

Figure S30. HSQC NMR of compound 4 (600 MHz, acetone-*d*<sub>6</sub>)

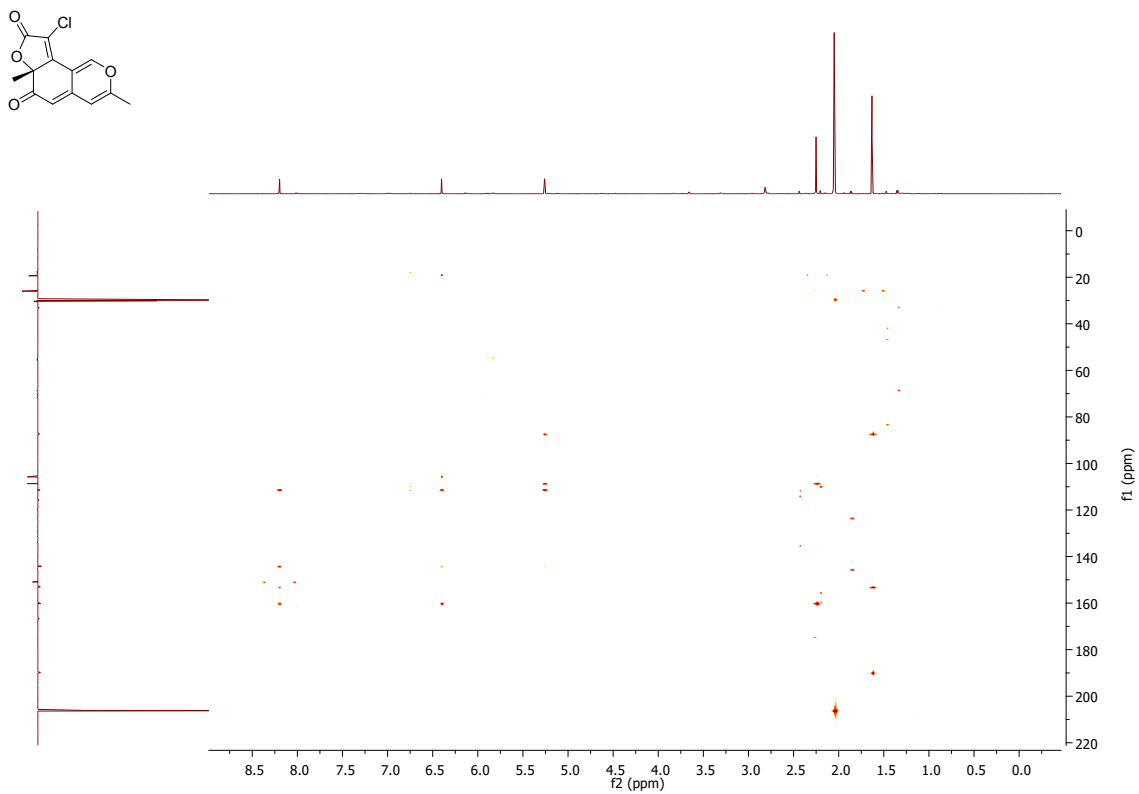

*Figure S31. HMBC NMR of compound 4 (600 MHz, acetone- $d_6$ )*

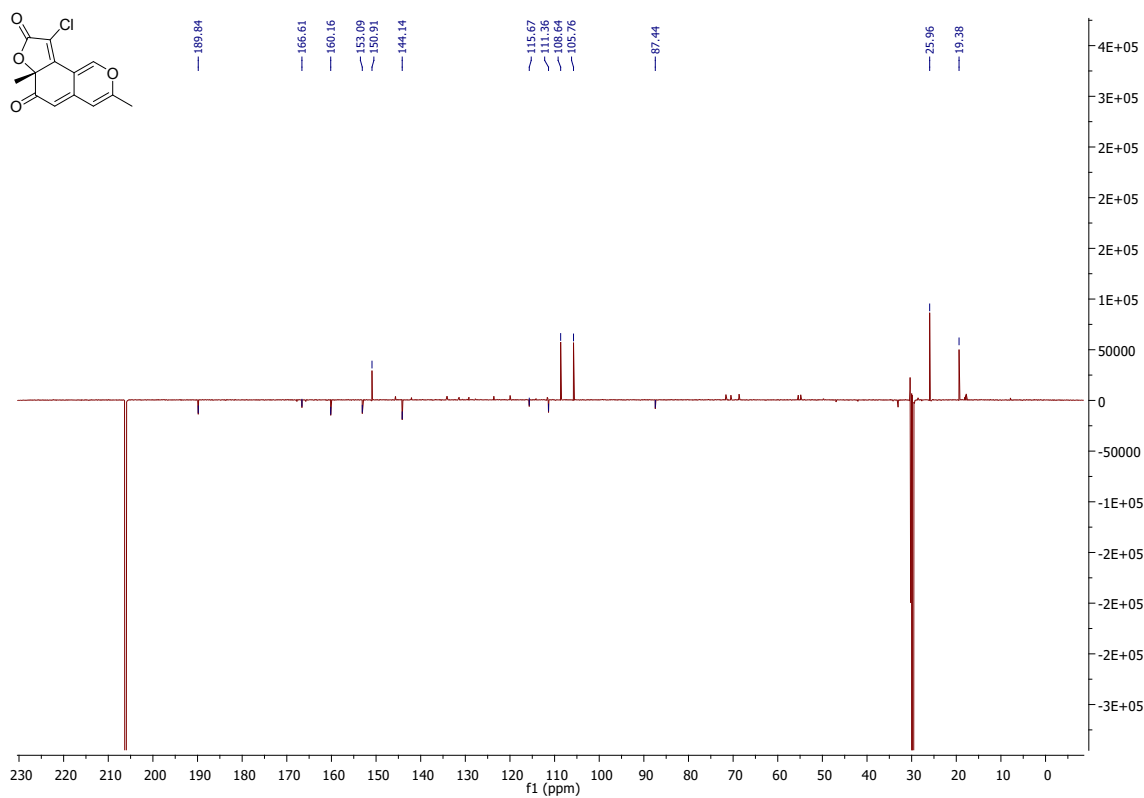

Figure S32. DEPT Q NMR of compound 4 (600 MHz, acetone- $d_6$ )

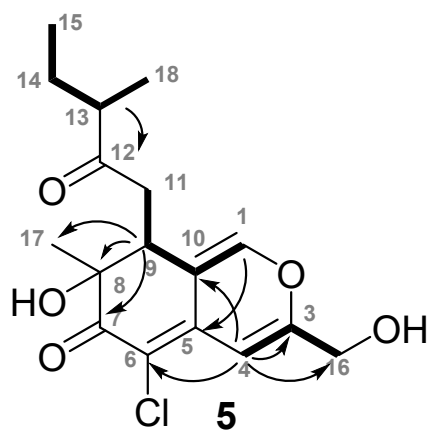

Figure S33. COSY correlations (bold bond), plain arrows represent HMBC correlations (arrows) of compound 5.

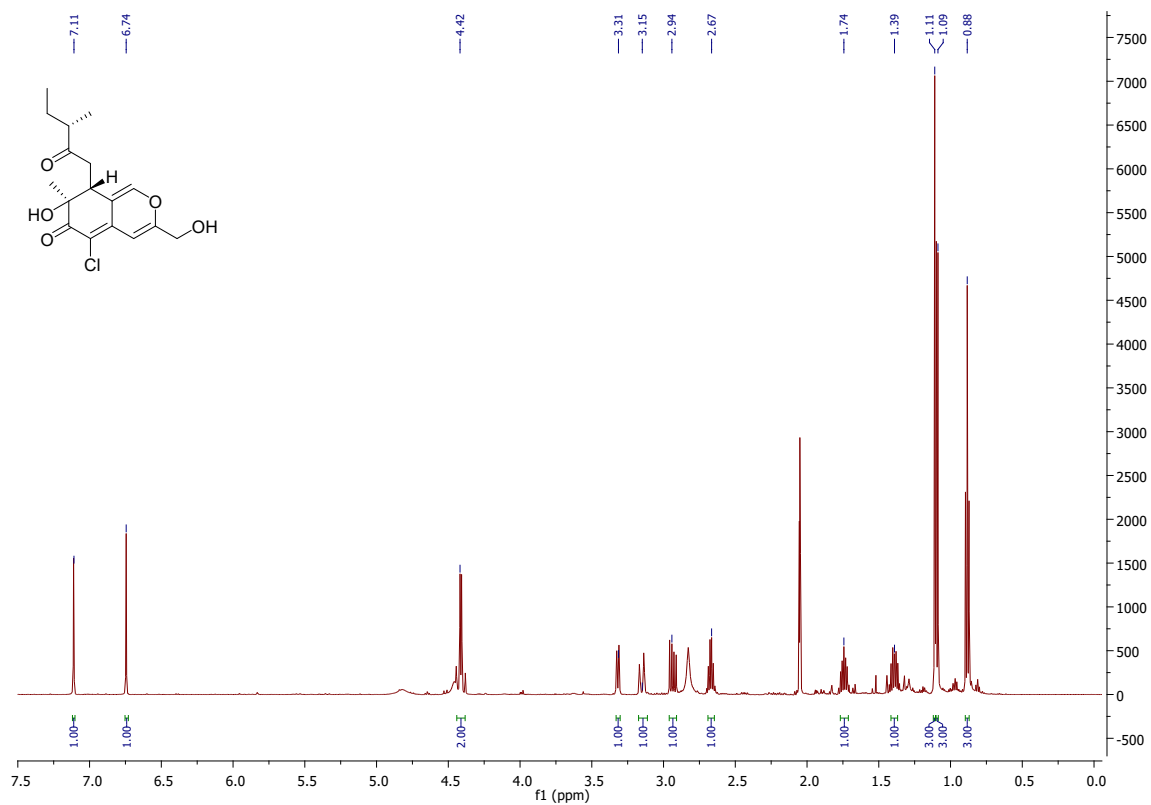

Figure S34.  $^1\text{H}$  NMR of compound 5 (600 MHz, acetone- $d_6$ )

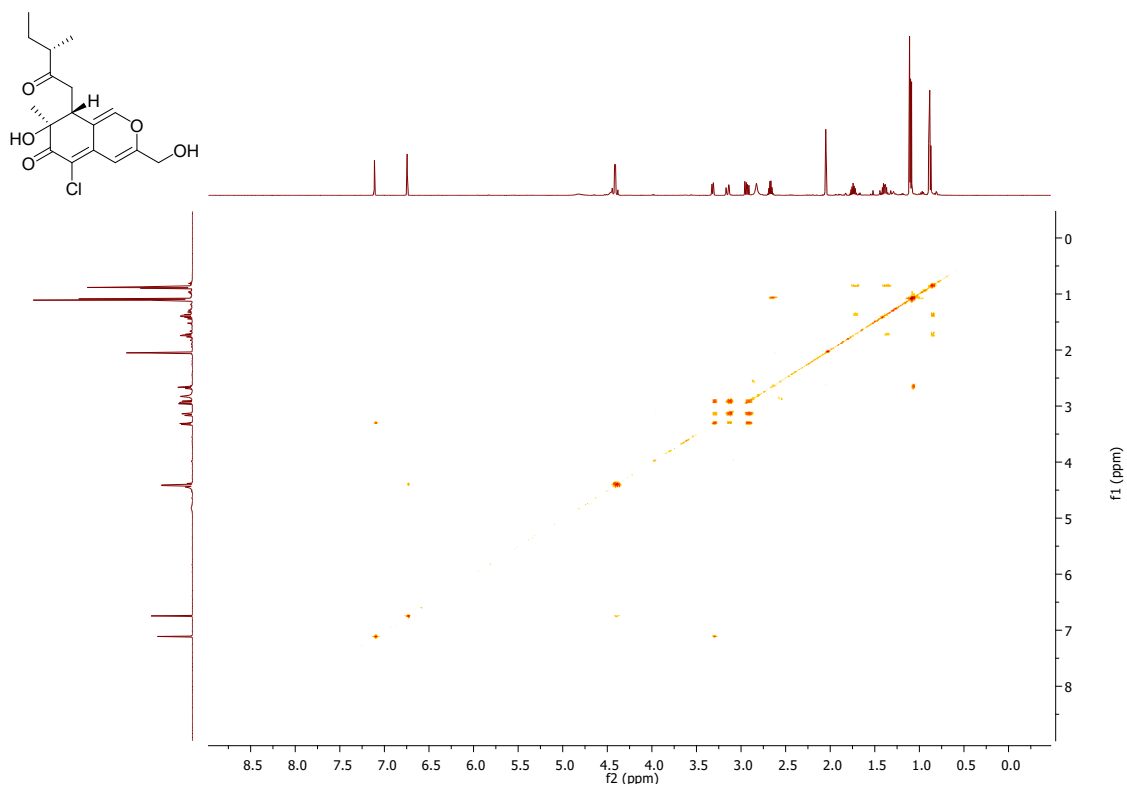

Figure S35. COSY NMR of compound 5 (600 MHz, acetone- $d_6$ )

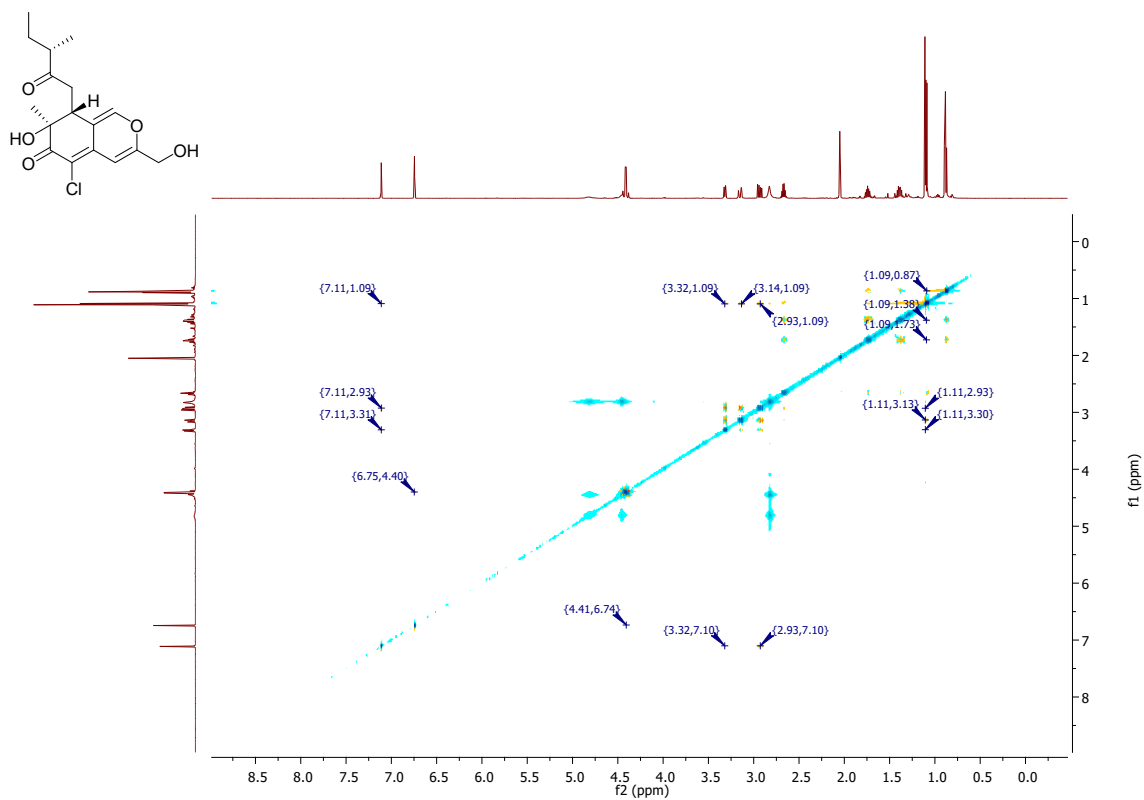

Figure S36. NOESY NMR of compound 5 (600 MHz, acetone- $d_6$ )

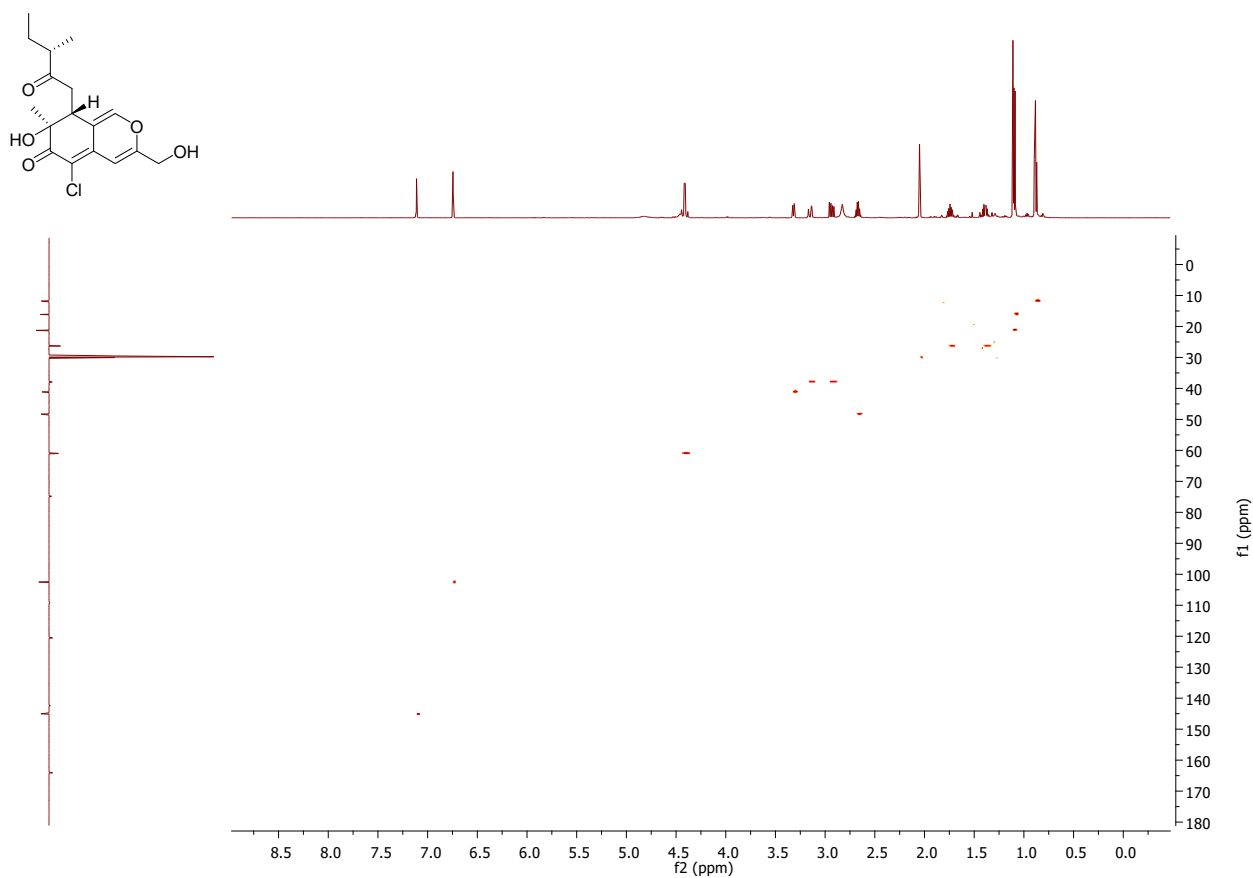

Figure S37. HSQC NMR of compound 5 (600 MHz, acetone- $d_6$ )

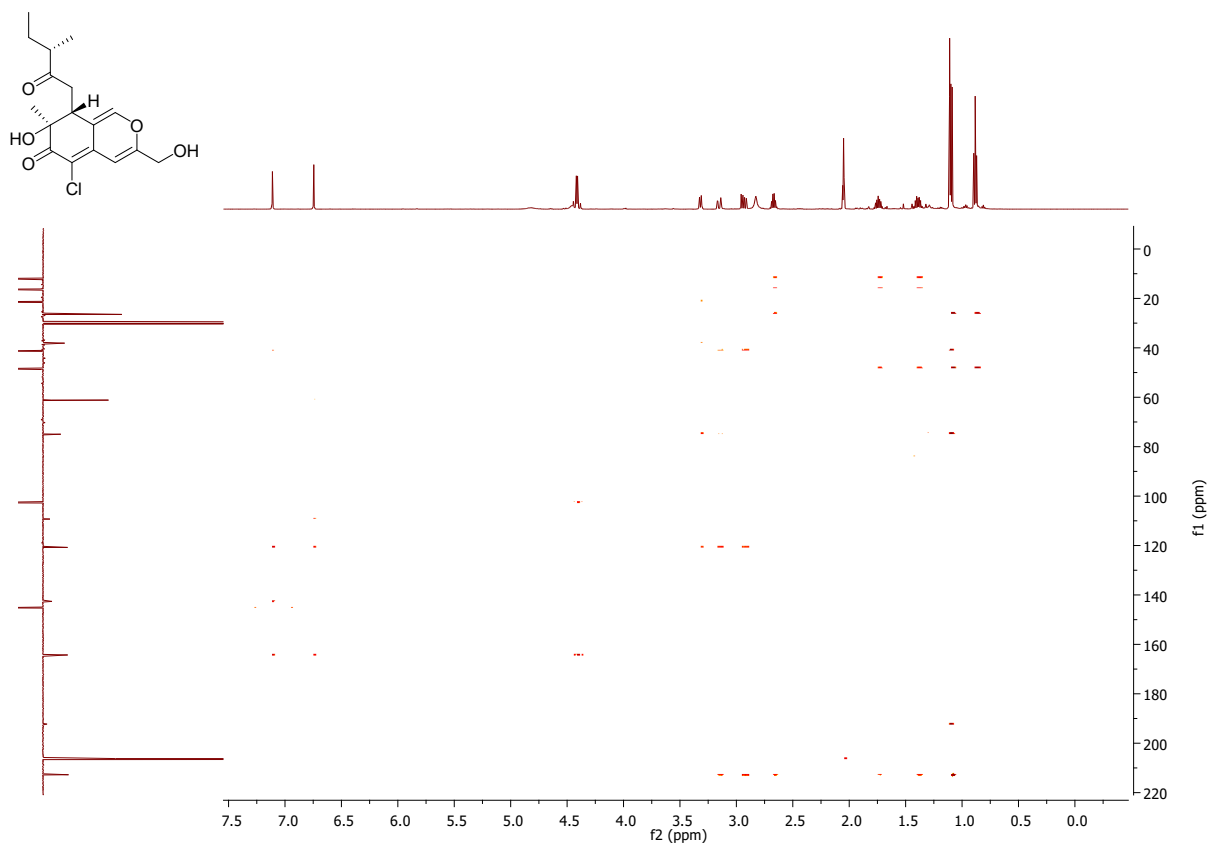

Figure S38. HMBC NMR of compound 5 (600 MHz, acetone- $d_6$ )

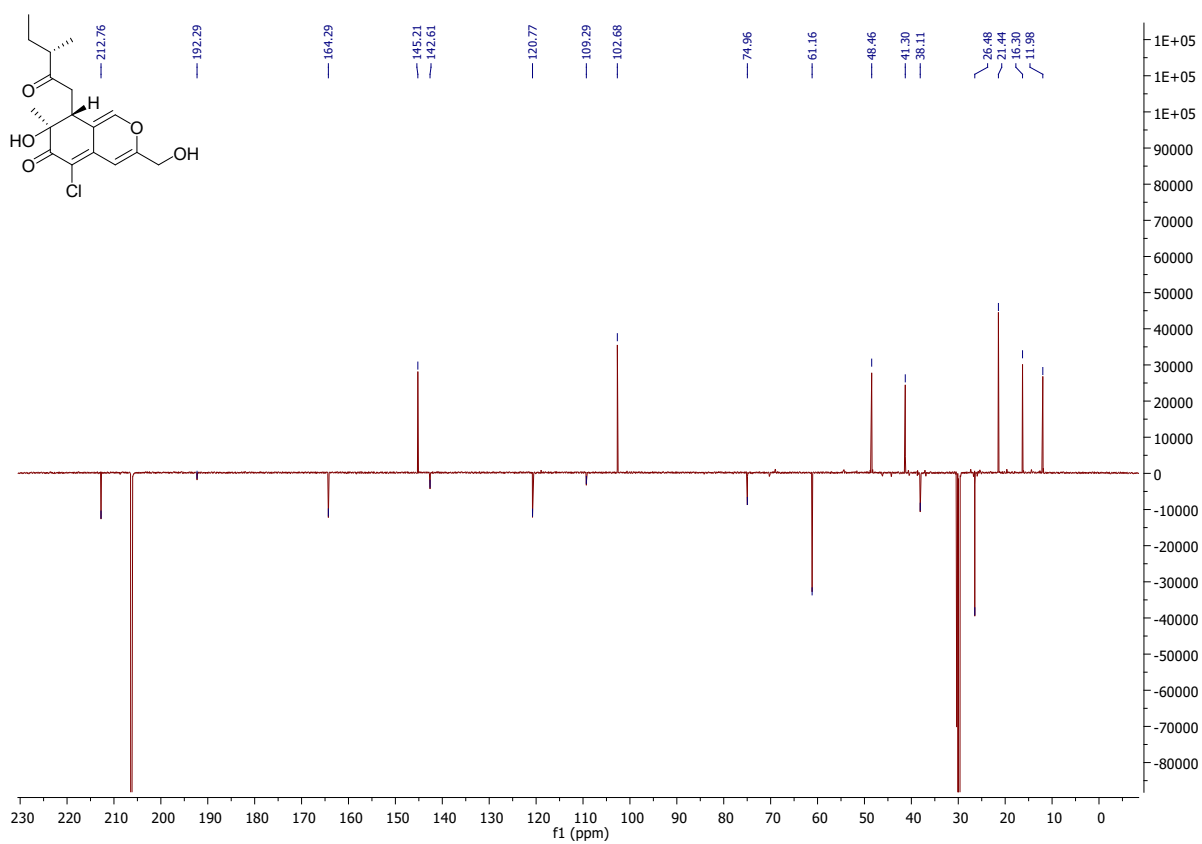

Figure S39. DEPT Q NMR of compound 5 (600 MHz, acetone- $d_6$ )

## 15) X-ray crystallographic analysis of compound 4

Single-Crystal X-ray diffraction data for chlorobartaphilone A (4) were collected on a Rigaku mm007 HF rotating anode using CuK $\alpha$  radiation ( $\lambda = 1.54187 \text{ \AA}$ ) delivered through Osmic CMF confocal optics, and a Rapid II curved Image Plate detector. The data were recorded at 293 K. Data collection, cell refinement and data reduction were performed with *Fs\_process*<sup>3</sup> software implemented within the *CrystalClear 2.0*<sup>4</sup> suite. Absorption correction using equivalent reflections was performed with the *Abacor* option program<sup>3</sup>. The structure was readily solved by intrinsic phasing methods (*SHELXT*)<sup>5</sup> and all non-hydrogen atoms were refined anisotropically by full-matrix least-squares methods on  $F^2$  using *SHELXL*<sup>6</sup>. The hydrogen atoms were first placed in idealized positions and refined as riding atoms isotropically with fixed individual displacement parameters. The refinement of the model was continued using the *Transferable aspherical atom model (TAAM)* approach within *Olex2*<sup>7</sup>. The aspherical atomic scattering factors computed by the DiSCaMB library<sup>8</sup> from the multipole model<sup>9</sup> and parametrized using the MATTS2021 data bank<sup>10</sup> were transferred into *NoSpherA2*<sup>11</sup> as a tsc file format. These form factors were utilized during the least-squares refinement against experimental intensities in an iterative cycle until convergence was achieved through *olex2.refine*<sup>12</sup>. The hydrogen atoms were therefore freely refined in an isotropic manner with only soft similar distance restraints for one methyl group. The absolute configuration of chlorobartaphilone A (C8 R) was determined unambiguously from the anomalous scattering by chloride at the copper wavelength using established methods<sup>13-15</sup>. A search of the Cambridge Structural Database (Version 5.45)<sup>16</sup> indicated four X-ray structures of azaphilone compounds incorporating an angular lactone moiety (CSD Refcodes URUNEB<sup>17</sup>, TEYKAL<sup>18</sup>, WUBNOZ<sup>19</sup> and XEXNUN<sup>20</sup>). Of these, the ChaetoviridinA<sup>15</sup> isolated from the crude extract of the fungal strain *Chaetomium elatum* No. 89-1-3-1 was the single example of 8R-configured azaphilone but unlike compound 4, a chloride atom is attached to the isochromene moiety and not to the lactone (see figure S40). URUNEB represents the S-form of ChaetoviridinA from the Endophyte *Chaetomium globosum* whereas the 8S- Aspersarin D (WUBNOZ) and -trichoflectin (XEXNUN) are non-chlorinated azaphilones (see figure S42).

X-ray crystallographic data in cif format are available at CCDC 2218370 and can be obtained free of charge via [www.ccdc.cam.ac.uk/data\\_request/cif](http://www.ccdc.cam.ac.uk/data_request/cif).

<sup>1</sup> [eurjchem.com/index.php/eurjchem/article/downloadSuppFile/1306/896](https://www.eurjchem.com/index.php/eurjchem/article/downloadSuppFile/1306/896) [Internet]. [accessed on the 9<sup>th</sup> November 2022]. Available on: <https://www.eurjchem.com/index.php/eurjchem/article/downloadSuppFile/1306/896>

<sup>2</sup> J. Hubert, J.M. Nuzillard, J.H. Renault. Dereplication strategies in natural product research: How many tools and methodologies behind the same concept? *Phytochem Rev.* **2017**,16, 55-95.

<sup>3</sup> T. Higashi, T. *ABSCOR* and *FS-PROCESS*. 1995; Rigaku Corporation, Tokyo, Japan.

<sup>4</sup> Rigaku. *CrystalClear-SM Expert*. 2009; Rigaku Corporation, Tokyo, Japan.

<sup>5</sup> G.M. Sheldrick, *SHELXT* - Integrated space-group and crystal-structure determination. *Acta Crystallogr A Found Adv.* **2015**, 71, 3-8.

<sup>6</sup> G.M. Sheldrick, Crystal Structure refinement with *SHELXL*. *Acta Crystallogr C Struct Chem.* **2015**, 71, 3-8.

- <sup>7</sup> O.V. Dolomanov, L.J. Bourhis, R.J. Gildea, J.A.K. Howard, H. Puschmann, OLEX2: a complete structure solution, refinement and analysis program. *J. Appl. Crystallogr.* **2009**, *42*, 339–341.
- <sup>8</sup> M.L. Chodkiewicz, S. Migacz, W. Rudnicki, A. Makal, J.A. Kalinowski, N.W. Moriarty, R.W. Grosse-Kunstleve, P.V. Afonine, P.D. Adams, P.M. Dominiak. *DiSCaMB*: a software library for aspherical atom model X-ray scattering factor calculations with CPUs and GPUs. *J. Appl. Crystallogr.* **2018**; *51*, 193–199.
- <sup>9</sup> N.K. Hansen, P. Coppens, Testing aspherical atom refinements on small-molecule data sets. *Acta Crystallogr A Found Adv.* **1978**, *34*, 909-921.
- <sup>10</sup> K.K. Jha, B. Gruza, A. Sypko, P. Kumar, M.L. Chodkiewicz, P.M. Dominiak, Multipolar Atom Types from Theory and Statistical Clustering (MATTS) Data Bank: Restructurization and Extension of UBDB. *J. Chem. Inf. Model.* **2022**, *62*, 3752–3765.
- <sup>11</sup> F. Kleemiss, O.V. Dolomanov, M. Bodensteiner, N. Peyerimhoff, L. Midgley, L.J. Bourhis, A. Genoni, L.A. Malaspina, D. Jayatilaka, J.L. Spencer, F. White, B. Grundkötter-Stock, S. Steinhauer, D. Lentz, H. Puschmann, S. Grabowsky. Accurate crystal structures and chemical properties from *NoSpherA2*. *Chem Sci.* **2021**, *12*, 1675–1692.
- <sup>12</sup> L.J. Bourhis, O.V. Dolomanov, R.J. Gildea, J.A.K. Howard, H. Puschmann, The anatomy of a comprehensive constrained, restrained refinement program for the modern computing environment - Olex2 dissected. *Acta Crystallogr A Found Adv.* **2015**, *71*, 59–75.
- <sup>13</sup> H.D. Flack, On enantiomorph-polarity estimation. *Acta Crystallogr A.* **1983**, *39*, 876-81.
- <sup>14</sup> S. Parsons, H.D. Flack, T. Wagner, Use of intensity quotients and differences in absolute structure refinement. *Acta Crystallogr Sect B Struct Sci Cryst Eng Mater.* **2013**, *69*, 249-59.
- <sup>15</sup> R.W.W. Hooft, L.H. Straver, A.L. Spek. Determination of absolute structure using Bayesian statistics on Bijvoet differences. *J Appl Crystallogr.* **2008**, *41*, 96-103.
- <sup>16</sup> C.R. Groom, I.J. Bruno, M.P. Lightfoot, S.C. Ward. The Cambridge Structural Database. *Acta Crystallogr B Struct Sci Cryst Eng Mater.* **2016**, *72*, 171–179.
- <sup>17</sup> W.S. Borges, G. Mancilla, D.O. Guimaraes, R. Duran-Patron, I.G. Collado, M.T. Pupo, Azaphilones from the endophyte *Chaetomium globosum*. *J Nat Prod.* **2011**, *74*, 1182-1187.
- <sup>18</sup> G.-D. Chen, Y.-L. Li, H. Gao, Y. Chen, X.-X. Li, J. Li, L.D. Guo, Y.-Z. Cen, X.-S. Yao, New Azaphilones and Chlorinated Phenolic Glycosides from *Chaetomium elatum* with Caspase-3 Inhibitory Activity. *Planta Med* **2012**, *78*, 1683-1689.
- <sup>19</sup> J.B. Pyser, S.A.B. Dockrey, A.R. Benitez, L.A. Joyce, R.A. Wiscons, J.L. Smith, A.R.H. Narayan. Stereodivergent, Chemoenzymatic Synthesis of Azaphilone Natural Products. *J Am Chem Soc.* **2019**, *141*, 18551-18559.
- <sup>20</sup> Z. Wu, F. Liu, S. Ke, Z. Zhang, H. Hu, W. Fang, S. Xiao, Y. Zhang, Y. Wang, K Wang, Secondary Metabolites from *Aspergillus sparsus* NBERC\_28952 and Their Herbicidal Activities. *Plants (Basel)*, **2023**; *12*, 203-213.



**Chlorobartaphilone A (4).** IR  $\nu_{\max}$ : 3443, 2106, 1647  $\text{cm}^{-1}$ ; UV (MeOH):  $\lambda_{\max}$  ( $\log \epsilon$ ) 348 (2.69), 260 (2.75); HRMS (ESI-TOF)  $m/z$  : 265.0262  $[\text{M}+\text{H}]^+$  Calcd for  $[\text{C}_{13}\text{H}_9\text{ClO}_4 + \text{H}]^+$ ; Found 265.0263.  $[\alpha]_D^{-10}$  (c 0.5,  $\text{CH}_3\text{OH}$ ). Crystallographic data:  $\text{C}_{13}\text{H}_9\text{ClO}_4$  (M= 264.67 g/mol): monoclinic, space group  $\text{P2}_1$ , a = 5.3067(4) Å, b= 9.1631(7) Å, c= 12.2106(9) Å,  $\alpha=90^\circ$ ,  $\beta= 99.671(7)^\circ$ ,  $\gamma= 90^\circ$ , V= 585.31(8) Å<sup>3</sup>, Z=2, T= 293(2) K,  $\mu(\text{CuK}\alpha)= 2.949 \text{ mm}^{-1}$ , F(000)= 272, crystal size = 0.29 x 0.08 x 0.03 mm<sup>3</sup>,  $\rho_{\text{calc}}= 1.502 \text{ g/cm}^3$ ; out of the 6697 reflections measured ( $3.67^\circ \leq \theta \leq 68.2^\circ$ ), 2101 were unique ( $R_{\text{int}}= 0.0438$ ,  $R_{\text{sigma}}=0.0581$ ) and 2096 were used in all calculations. The final  $R_1$  was 0.037 ( $I > 2\sigma(I)$ ), and  $wR_2$  was 0.1016 (all data). Flack parameter (using 542 quotients ( $[(I^+)-(I^-)]/[(I^+)+(I^-)] = 0.020(12)$ )).

*Table S4* Crystal data and structure refinement for chlorobartaphilone A

|                                |                                                                                     |                                                                                                                                |
|--------------------------------|-------------------------------------------------------------------------------------|--------------------------------------------------------------------------------------------------------------------------------|
| Identification code            |                                                                                     | <i>Chlorobartaphilone A</i>                                                                                                    |
| 2D-scheme                      |                                                                                     | 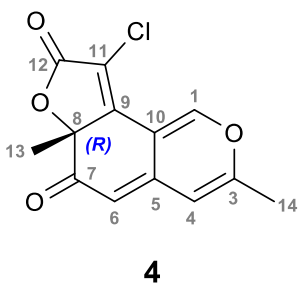 <p style="text-align: center;"><b>4</b></p> |
| Empirical formula              |                                                                                     | $\text{C}_{13} \text{H}_9 \text{Cl O}_4$                                                                                       |
| Formula weight                 |                                                                                     | 264.67                                                                                                                         |
| Temperature                    | (K)                                                                                 | 293(2)                                                                                                                         |
| Diffractionmeter               |  | MM007-HF<br>rotating anode Spider                                                                                              |
| Wavelength                     | (Å)                                                                                 | 1.54187                                                                                                                        |
| Crystal system,<br>space group |                                                                                     | Monoclinic,<br>$\text{P2}_1$                                                                                                   |
| Unit cell dimensions           | a (Å)                                                                               | 5.3067(4)                                                                                                                      |
|                                | b                                                                                   | 9.1631(7)                                                                                                                      |
|                                | c                                                                                   | 12.2106(9)                                                                                                                     |
|                                | $\alpha$ (°)                                                                        | 90                                                                                                                             |
|                                | $\beta$                                                                             | 99.671(7)                                                                                                                      |
|                                | $\gamma$                                                                            | 90                                                                                                                             |
| Volume                         | (Å <sup>3</sup> )                                                                   | 585.31(8)                                                                                                                      |

|                                              |                                                                                               |                                                                                          |
|----------------------------------------------|-----------------------------------------------------------------------------------------------|------------------------------------------------------------------------------------------|
| Z,                                           |                                                                                               | 2,                                                                                       |
| Calculated density                           | Mg/m <sup>3</sup>                                                                             | 1.502                                                                                    |
| Absorption coefficient                       | mm <sup>-1</sup>                                                                              | 2.949                                                                                    |
| F(000)                                       |                                                                                               | 272                                                                                      |
| Crystal size                                 | mm                                                                                            | 0.29 x 0.08 x 0.03                                                                       |
| θ range for data collection                  | (°)                                                                                           | 3.67 to 68.19                                                                            |
| Limiting indices                             |                                                                                               | -6 ≤ h ≤ 6,<br>-11 ≤ k ≤ 10,<br>-14 ≤ l ≤ 14                                             |
| Reflections collected / unique               |                                                                                               | 6697 / 2101                                                                              |
| R(int)                                       |                                                                                               | 0.0438                                                                                   |
| Completeness to θ <sub>full</sub>            | (%)                                                                                           | 99.6                                                                                     |
| Absorption correction                        |                                                                                               | Semi-empirical from equivalents                                                          |
| Max. and min. transmission                   |                                                                                               | 1.000 and 0.675                                                                          |
| Refinement method                            |                                                                                               | transferable aspherical atom model (TAAM)<br>Full-matrix least-squares on F <sup>2</sup> |
| Data / restraints / parameters               |                                                                                               | 2096 / 4 / 190                                                                           |
| Goodness-of-fit on F <sup>2</sup>            |                                                                                               | 1.052                                                                                    |
| Final R indices [ <i>I</i> > 2σ( <i>I</i> )] | R1<br>wR2                                                                                     | 0.037,<br>0.0709                                                                         |
| R indices (all data)                         | R1<br>wR2                                                                                     | 0.0759,<br>0.1016                                                                        |
| Absolute structure <sup>s</sup> parameters   | Flack <sup>10</sup><br>Parsons <sup>11</sup><br><i>Hooft</i> <sup>12</sup><br><i>P2(true)</i> | 0.027(12)<br>0.020(12)<br>-0.001(13)<br>1.000                                            |

|                             |                     |                |
|-----------------------------|---------------------|----------------|
|                             | <i>P3(true)</i>     | 1.000          |
|                             | <i>P3(rac-twin)</i> | 0.000          |
|                             | <i>P3(false)</i>    | 0.000          |
| Largest diff. peak and hole | e.Å <sup>-3</sup>   | 0.44 and -0.29 |
| CCDC deposit number         |                     | 2218370        |

<sup>s</sup> Degree of confidence in configuration assignment from XRD:

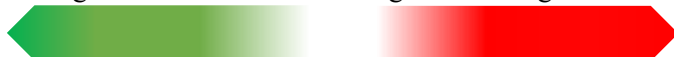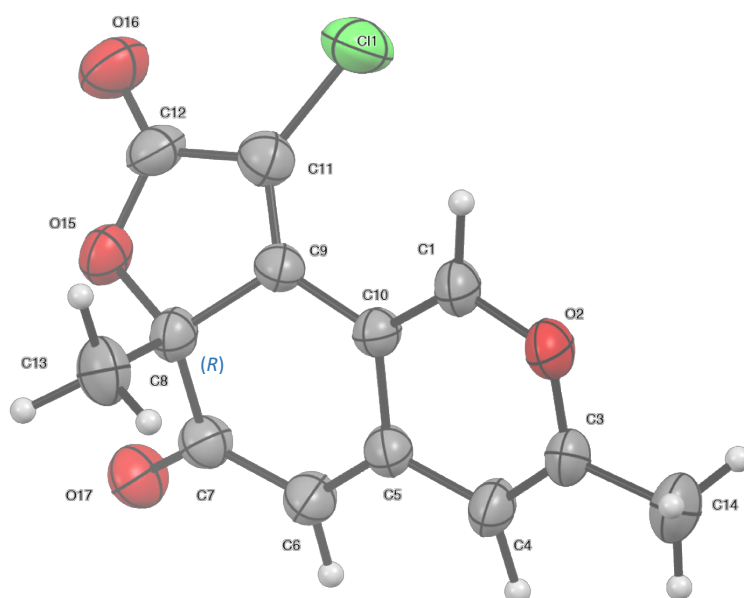

**Figure S40.** Ortep view of chlorobartaphilone A. Ellipsoids are drawn at the 50% probability level and H atoms with radius of arbitrary size.

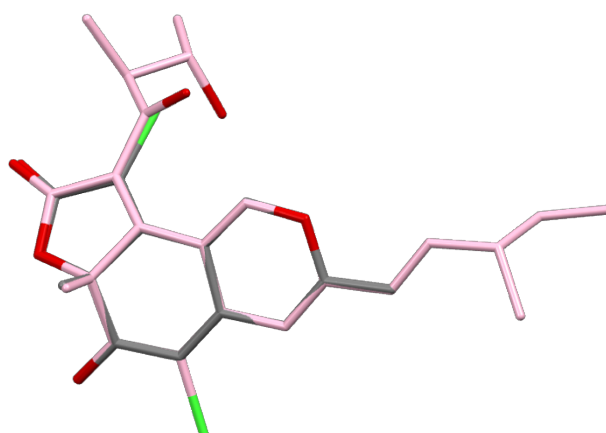

**Figure S41.** Overlay over the isochromene moiety between 4 and CSD refcode TEYKAL (carbon atoms in pink).

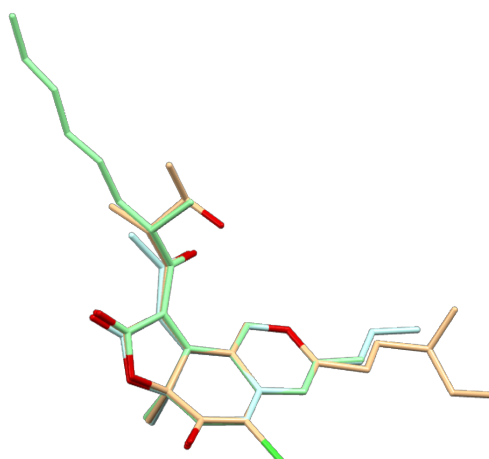

**Figure S42.** Overlay between CSD Refcode URUNEB (carbon atoms in ochre), WUBNOZ (carbon atoms in cyan), and XEXNUN (carbon atoms in water green).

## 16) Computational Methods.

Conformational analyses of the stereoisomers of compounds **2** and **3** were performed with Schrodinger MacroModel. The conformer generation was performed using the OPLS3 force field with chloroform as the selected solvent. The energy window was set to 5.0 kcal/mol. Due to the flexibility of the molecule, coupling constants were used constrain the torsion angles, NOESY correlations were used to constrain distances and the maximum atom deviation was increased to 1 Å to remove redundant conformers. The conformers generated were further optimized using DFT, at the B3LYP/6-31\* level in Gaussian 16, and at the same time, the free energy of each conformer was calculated [1]. The isotropic shielding tensors were then calculated at the mPW1PW91/6-31+G\*\* level. The shielding tensors were compared using DP4+ and were converted to  $^{13}\text{C}$  NMR shifts using a linear regression from a test set of molecules. The rotational strength for each conformer was then calculated by using TDDFT in Gaussian 16 at the wb97XD/def2TZVP level for 50 excited states. A polarizable continuum solvation model was used for DFT calculations [2]. The ECD spectra of all conformers were Boltzmann weighted based on the free-energy, combined, and corrected with the experimental UV spectra in the freely available software SpecDis 1.7. [3].

1. M.J. Frisch, G.W. Trucks, H.B. Schlegel, G.E. Scuseria, *et al* and D.J. Fox, Gaussian 16; Gaussian: Wallingford, CT, 2016.
2. J. Tomasi, B. Mennucci, R. Cammi, Quantum Mechanical Continuum Solvation Models. *Chem. Rev.* **2005**, *105*, 2999– 3094, DOI: 10.1021/cr9904009
3. T. Bruhn, A. Schaumlöffel, Y. Hemberger, G. Bringmann, SpecDis: quantifying the comparison of calculated and experimental electronic circular dichroism spectra. *Chirality* **2013**, *25*, 243– 249, DOI: 10.1002/chir.22138

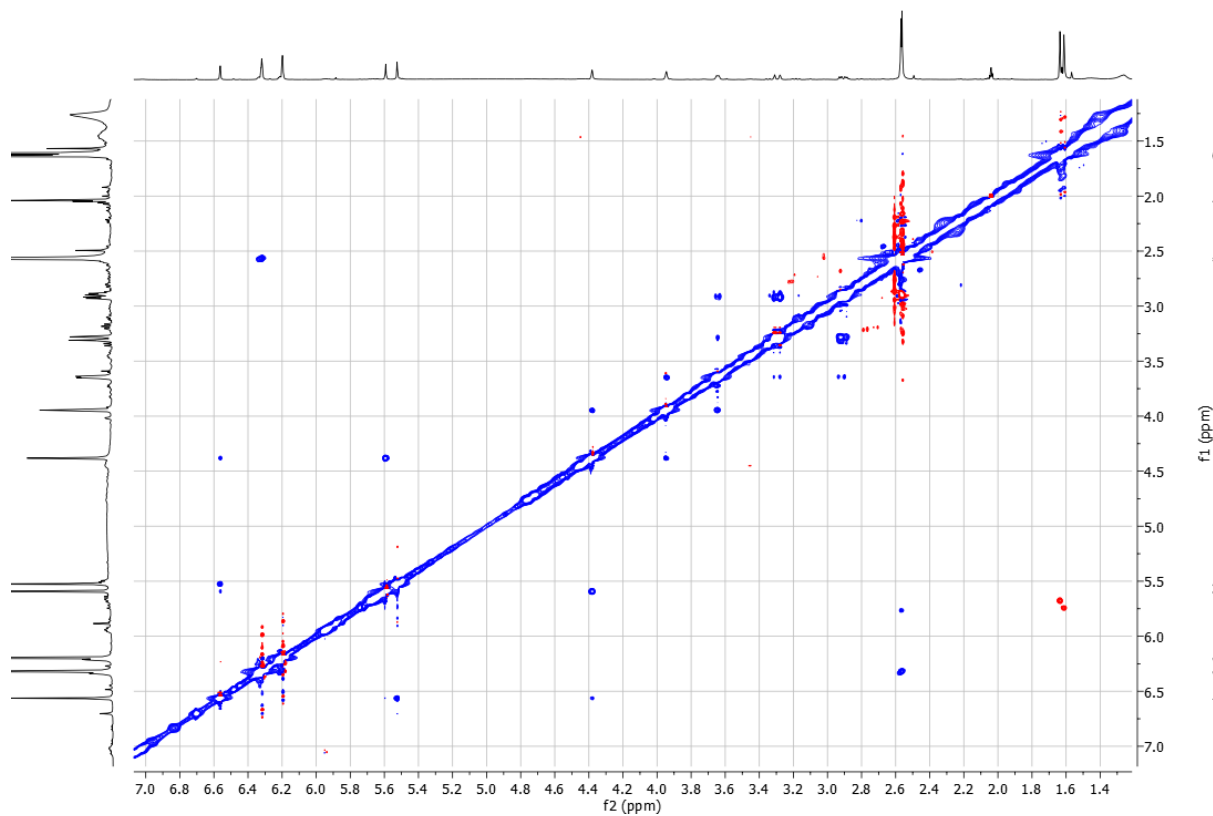

Figure S43. NOESY NMR spectra (600 MHz) of diazaphilonic acid (2) in acetone- $d_6$ .

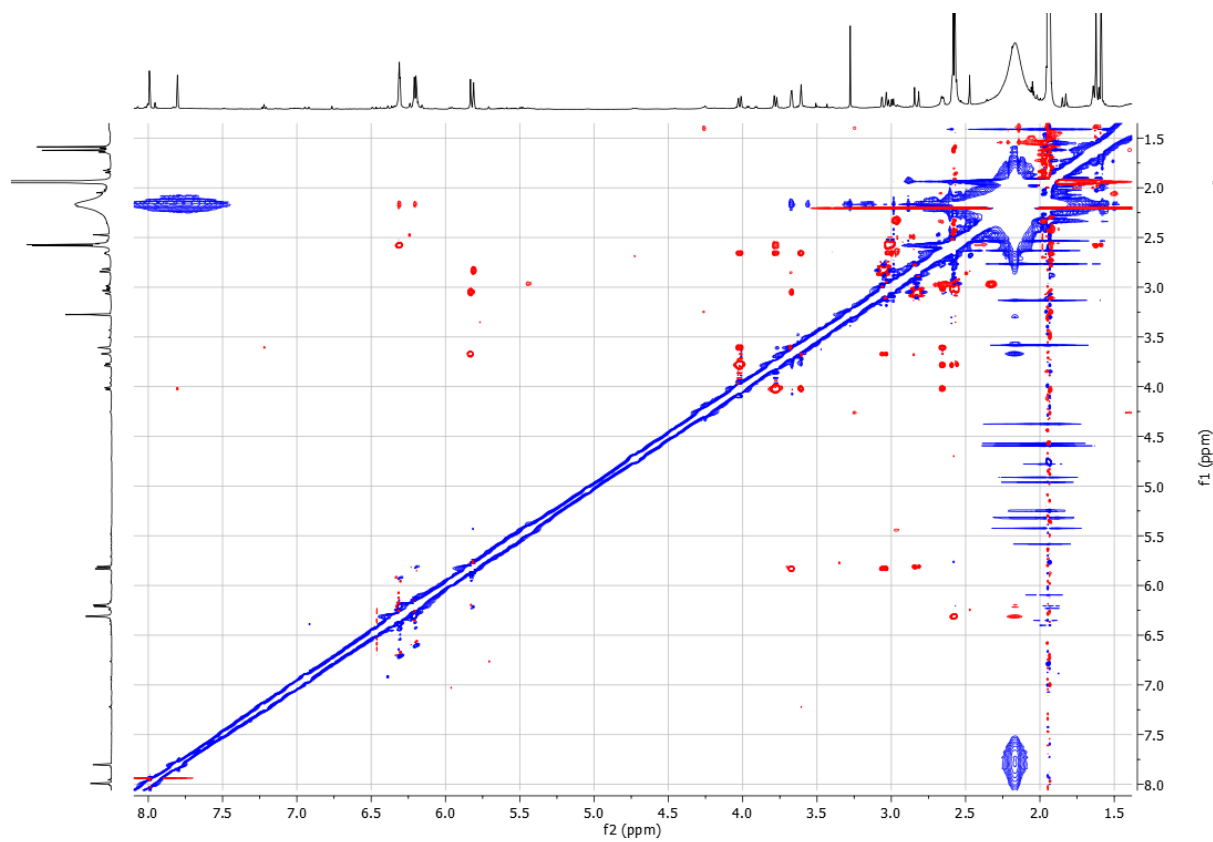

Figure S44. NOESY NMR spectra (600 MHz) of pavesiflonic acid (3) in acetonitrile- $d_3$ .

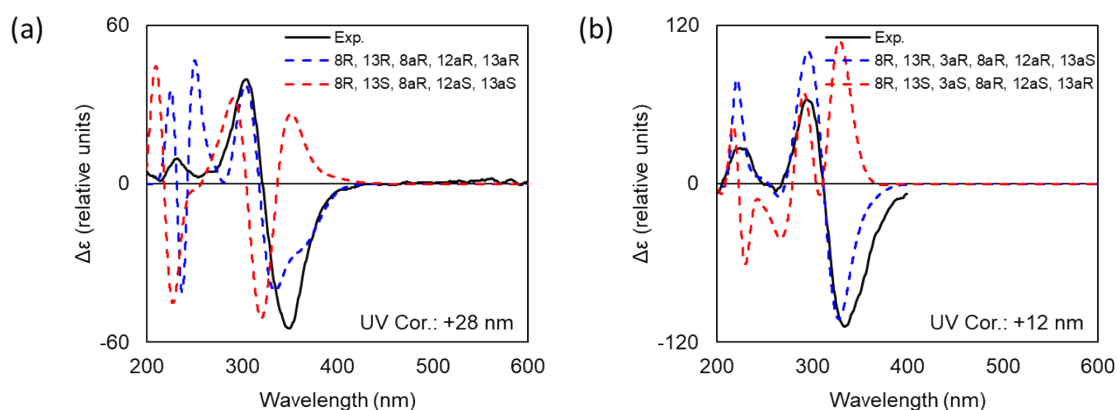

**Figure S45.** Comparison of calculated and experimental ECD for the two (8R, 8aR) stereoisomers of (a) diazaphilonic acid (2) and (b) pavesiflonic acid (3).

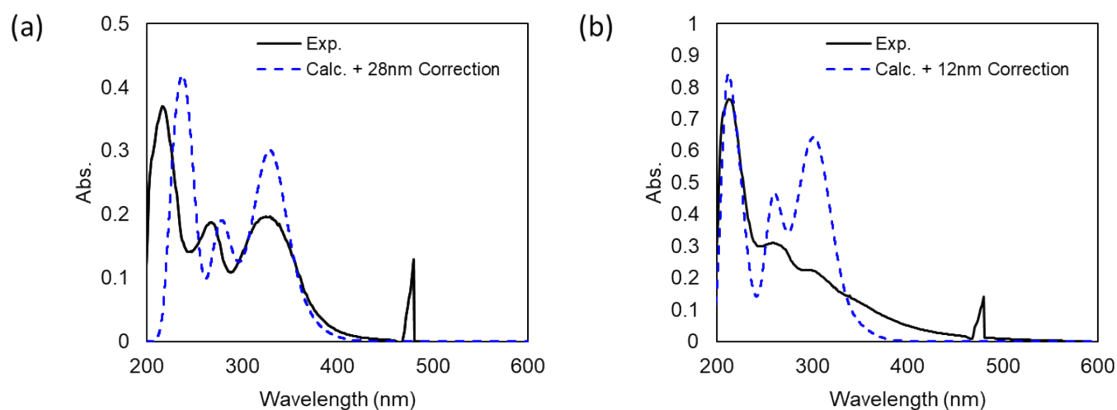

**Figure S46.** Comparison of calculated plus correction and experimental UV for (a) diazaphilonic acid (2) and (b) pavesiflonic acid (3).

**Table S5.** Experimental and calculated  $^{13}\text{C}$  NMR shifts for Diazaphilonic acid (Iso1: 8S,13S, 8aS, 12aS, 13aS, Iso2: 8S,13R, 8aS, 12aR, 13aR) and Pavesiflonic acid (Iso1: 8S,13R, 3aR, 8aR, 12aR, 13aS, Iso2: 8S,13S, 3aS, 8aR, 12aS, 13aR). Also displayed is the difference in calculated shift between the two isomers that indicates no large enough differences for a configurational assignment.

| Diazaphilonic acid (2) $\delta_c$ |       |        |        |                             | Pavesiflonic acid (3) $\delta_c$ |       |        |        |                             |
|-----------------------------------|-------|--------|--------|-----------------------------|----------------------------------|-------|--------|--------|-----------------------------|
| Pos.                              | Exp.  | Iso 1  | Iso 2  | $\Delta_{\text{Iso1-Iso2}}$ | Pos.                             | Exp.  | Iso 1  | Iso 2  | $\Delta_{\text{Iso1-Iso2}}$ |
| 1                                 | 154.1 | 156.27 | 156.00 | 0.27                        | 1                                | 154.4 | 155.46 | 154.82 | 0.64                        |
| 3                                 | 159.0 | 161.13 | 162.76 | -1.63                       | 3                                | 160.5 | 162.86 | 163.03 | -0.17                       |
| 4                                 | 111.6 | 113.95 | 112.24 | 1.71                        | 4                                | 114.5 | 116.21 | 116.06 | 0.15                        |
| 5                                 | 142.2 | 143.94 | 143.65 | 0.29                        | 5                                | 143.9 | 143.73 | 143.8  | -0.07                       |
| 6                                 | 105.3 | 105.08 | 104.66 | 0.42                        | 6                                | 105.1 | 105.52 | 105.91 | -0.39                       |
| 7                                 | 192.1 | 188.47 | 189.06 | -0.59                       | 7                                | 192.6 | 189.41 | 189.03 | 0.38                        |
| 8                                 | 86.2  | 83.95  | 84.32  | -0.37                       | 8                                | 86.5  | 85.38  | 84.71  | 0.67                        |
| 9                                 | 193.0 | 192.92 | 193.07 | -0.15                       | 9                                | 193.9 | 194.42 | 194.44 | -0.02                       |

|             |       |               |               |             |             |       |               |               |             |
|-------------|-------|---------------|---------------|-------------|-------------|-------|---------------|---------------|-------------|
| 10          | 116.2 | 117.13        | 116.80        | 0.33        | 10          | 116.2 | 116.74        | 117.07        | -0.33       |
| 11          | 22.7  | 21.90         | 22.34         | -0.44       | 11          | 22.9  | 22.02         | 21.97         | 0.05        |
| 12          | 26.3  | 24.77         | 25.77         | -1.00       | 12          | 30.8  | 31.37         | 30.91         | 0.46        |
| 13          | 38.0  | 37.34         | 37.49         | -0.15       | 13          | 28.8  | 29.34         | 29.2          | 0.14        |
| 14          | 173.4 | 174.89        | 175.14        | -0.25       | 14          | 70.2  | 68.96         | 69.06         | -0.10       |
| 1a          | 155.5 | 155.66        | 156.05        | -0.39       | 1a          | 157.3 | 158.25        | 158.02        | 0.23        |
| 3a          | 158.6 | 161.76        | 161.76        | 0.00        | 3a          | 103.5 | 104.16        | 104.16        | 0.00        |
| 4a          | 111.8 | 114.52        | 114.67        | -0.15       | 4a          | 36.6  | 36.85         | 36.52         | 0.33        |
| 5a          | 143.2 | 144.82        | 144.97        | -0.15       | 5a          | 146.7 | 149.66        | 149.51        | 0.15        |
| 6a          | 108.4 | 107.53        | 107.39        | 0.14        | 6a          | 119.4 | 118.1         | 118.78        | -0.68       |
| 7a          | 192.4 | 188.70        | 188.85        | -0.15       | 7a          | 193.8 | 192.03        | 192.16        | -0.13       |
| 8a          | 86.5  | 84.95         | 84.35         | 0.60        | 8a          | 86.7  | 86.18         | 86.19         | -0.01       |
| 9a          | 193.0 | 193.14        | 192.75        | 0.39        | 9a          | 192.6 | 191.24        | 191.88        | -0.64       |
| 10a         | 115.8 | 117.58        | 117.00        | 0.58        | 10a         | 112.7 | 112.99        | 113.98        | -0.99       |
| 11a         | 22.6  | 21.93         | 22.26         | -0.33       | 11a         | 22.9  | 22.05         | 22.24         | -0.19       |
| 12a         | 39.4  | 40.77         | 40.96         | -0.19       | 12a         | 37.1  | 38.67         | 38.27         | 0.40        |
| 13a         | 43.5  | 46.35         | 45.99         | 0.36        | 13a         | 39.2  | 39.29         | 39.75         | -0.46       |
| 14a         | 172.7 | 174.49        | 174.34        | 0.15        | 14a         | 172.7 | 179.93        | 179.9         | 0.03        |
| 1'          | 104.7 | 104.71        | 104.78        | -0.07       | 1'          | 105.1 | 105.2         | 105.2         | 0.00        |
| 2'          | 166.1 | 165.60        | 165.61        | -0.01       | 2'          | 166   | 163.95        | 163.69        | 0.26        |
| 3'          | 101.6 | 99.89         | 99.69         | 0.20        | 3'          | 101.7 | 100.86        | 100.89        | -0.03       |
| 4'          | 163.9 | 160.98        | 160.42        | 0.56        | 4'          | 163.6 | 159.5         | 159.47        | 0.03        |
| 5'          | 112.6 | 110.04        | 109.85        | 0.19        | 5'          | 112.7 | 110.72        | 110.69        | 0.03        |
| 6'          | 144.7 | 147.52        | 147.71        | -0.19       | 6'          | 145.1 | 146.76        | 146.66        | 0.10        |
| 7'          | 24.0  | 24.58         | 24.37         | 0.21        | 7'          | 24    | 24.48         | 24.66         | -0.18       |
| 8'          | 170.3 | 169.84        | 169.93        | -0.09       | 8'          | 170.6 | 172.15        | 172.05        | 0.10        |
| 1'a         | 104.7 | 104.81        | 104.68        | 0.13        | 1'a         | 104.9 | 105.25        | 104.95        | 0.30        |
| 2'a         | 166.1 | 165.16        | 165.41        | -0.25       | 2'a         | 166   | 164.66        | 164.45        | 0.21        |
| 3'a         | 101.6 | 100.02        | 99.72         | 0.30        | 3'a         | 101.7 | 100.76        | 101.25        | -0.49       |
| 4'a         | 163.9 | 160.83        | 160.55        | 0.28        | 4'a         | 163.6 | 159.18        | 159.52        | -0.34       |
| 5'a         | 112.6 | 109.85        | 109.91        | -0.06       | 5'a         | 112.7 | 110.62        | 110.72        | -0.10       |
| 6'a         | 144.7 | 147.22        | 147.73        | -0.51       | 6'a         | 145.2 | 146.86        | 146.81        | 0.05        |
| 7'a         | 24.0  | 24.55         | 24.57         | -0.02       | 7'a         | 24    | 24.94         | 24.89         | 0.05        |
| 8'a         | 170.3 | 169.85        | 169.83        | 0.02        | 8'a         | 170.5 | 172.22        | 171.61        | 0.61        |
| <b>MAE</b>  |       | <b>1.57</b>   | <b>1.55</b>   | <b>0.34</b> | <b>MAE</b>  |       | <b>1.57</b>   | <b>1.55</b>   | <b>0.34</b> |
| <b>DP4+</b> |       | <b>50.49%</b> | <b>49.51%</b> |             | <b>DP4+</b> |       | <b>57.52%</b> | <b>42.48%</b> |             |

**Data S1.** Lowest energy conformer 3D structure, all overlaid 3D structures, cartesian coordinates, number of imaginary frequencies, and energy for (8S, 13S, 8aS, 12aS, 13aS)-Diazaphilonic acid conformers.

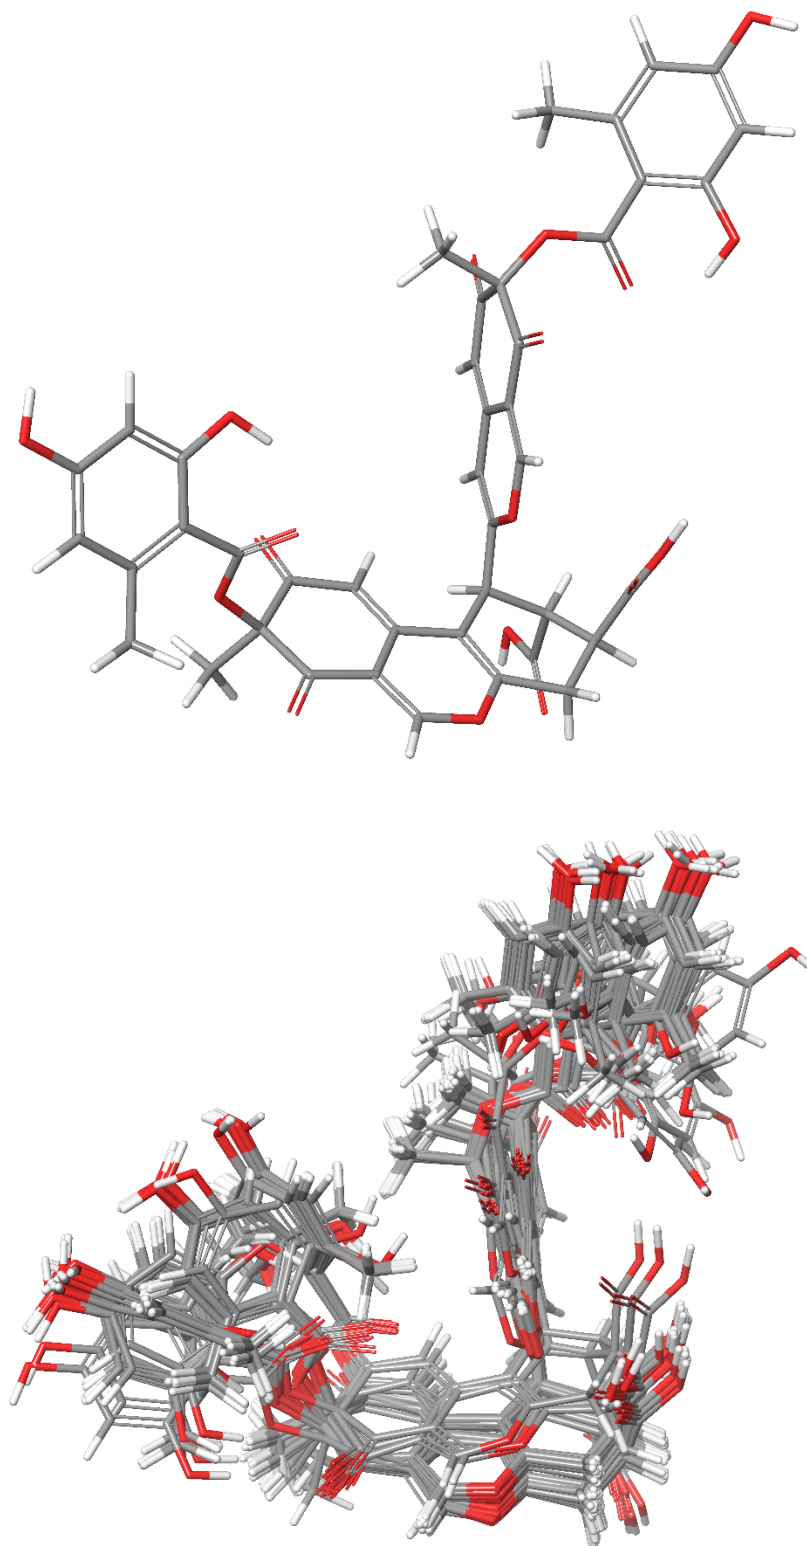



**(8S, 13S, 8aS, 12aS, 13aS)-Diazaphilonic acid (2) - Conformer 1**

| Atom | X        | Y        | Z        | Atom | X          | Y          | Z          |
|------|----------|----------|----------|------|------------|------------|------------|
| C    | 1.946572 | 7.238342 | -1.77382 | C    | 3.0126045  | -0.778233  | -2.2563341 |
| C    | 0.608001 | 7.48202  | -1.66807 | C    | 3.5684412  | -0.0958068 | -1.1622126 |
| C    | -0.292   | 6.58461  | -0.95507 | C    | 3.2196361  | 1.2170668  | -0.8819043 |
| C    | 0.211955 | 5.34674  | -0.30324 | C    | -0.9032281 | 13.487671  | 5.4415501  |
| C    | 1.742656 | 5.20209  | -0.20579 | C    | -0.5537084 | 13.440657  | 6.7826778  |
| C    | 2.569996 | 6.055706 | -1.20889 | C    | -0.7612145 | 12.281555  | 7.5482384  |
| C    | -0.05306 | 8.621815 | -2.27466 | C    | -1.3027989 | 11.140746  | 6.9734106  |
| C    | -1.38414 | 8.81045  | -2.17067 | C    | -1.652515  | 11.151317  | 5.6195608  |
| O    | -2.18214 | 7.943639 | -1.46202 | C    | 3.8973556  | 1.87806    | 0.2979091  |
| C    | -1.61384 | 6.857265 | -0.89131 | O    | 0.9002402  | 1.7383628  | -3.7316963 |
| C    | -2.17635 | 9.922211 | -2.82516 | O    | 3.4093814  | -2.0656049 | -2.4422958 |
| C    | -3.23191 | 10.50295 | -1.8972  | C    | -0.6118399 | 14.770338  | 4.6944314  |
| C    | -4.53845 | 10.2099  | -2.10129 | O    | -0.3946273 | 12.337241  | 8.8563337  |
| C    | -5.13006 | 9.375156 | -3.19432 | O    | -2.1509491 | 10.006003  | 5.1292103  |
| C    | -4.08675 | 8.66566  | -4.07002 | H    | 2.5929415  | 7.8993116  | -2.3434311 |
| C    | -2.7826  | 9.480834 | -4.19605 | H    | 0.5349511  | 9.3383041  | -2.8397016 |
| C    | -2.83216 | 11.36886 | -0.78719 | H    | -2.3360019 | 6.231173   | -0.3825154 |
| C    | -3.93536 | 11.85685 | 0.028481 | H    | -1.4504696 | 10.708476  | -3.0508854 |
| C    | -5.20543 | 11.50212 | -0.26228 | H    | -5.7484906 | 10.031406  | -3.8176658 |
| O    | -5.53703 | 10.70831 | -1.29898 | H    | -5.7973714 | 8.6313152  | -2.7468671 |
| C    | -1.5377  | 11.70209 | -0.49903 | H    | -4.5014519 | 8.5892194  | -5.0830917 |
| C    | -1.16836 | 12.53908 | 0.628918 | H    | -2.0262002 | 8.8780163  | -4.7099367 |
| C    | -2.29091 | 13.31412 | 1.368373 | H    | -6.0644438 | 11.823178  | 0.3134649  |
| C    | -3.70857 | 12.73703 | 1.20549  | H    | -0.7027067 | 11.300152  | -1.0600464 |
| O    | -1.9604  | 13.42256 | 2.761798 | H    | -2.5528383 | 14.777662  | -0.2240476 |
| C    | -1.92439 | 12.25729 | 3.439109 | H    | -3.0491432 | 15.338298  | 1.3932145  |
| C    | -1.48459 | 12.33226 | 4.829901 | H    | -1.3118789 | 15.196337  | 0.9800397  |
| C    | -2.30384 | 14.75834 | 0.842121 | H    | 1.9169215  | 6.6434469  | 1.4186228  |
| O    | 2.112051 | 3.819969 | -0.34391 | H    | 1.6425998  | 4.9618105  | 1.9404743  |
| C    | 1.798318 | 3.250137 | -1.52279 | H    | 3.2454451  | 5.4650159  | 1.3187411  |
| C    | 2.276669 | 1.884316 | -1.72555 | H    | -2.156951  | 12.202991  | -5.8034547 |
| C    | 2.164834 | 5.595915 | 1.21881  | H    | -2.7651678 | 5.7287612  | -3.969255  |
| O    | -0.53038 | 4.526632 | 0.205495 | H    | 1.6872986  | -0.6438845 | -3.9696198 |
| O    | 3.732362 | 5.737921 | -1.42582 | H    | 4.287662   | -0.6195281 | -0.5418432 |

|   |          |          |          |   |            |            |           |
|---|----------|----------|----------|---|------------|------------|-----------|
| O | -4.60942 | 13.06986 | 1.95448  | H | -0.1040521 | 14.301323  | 7.2658592 |
| O | -0.0067  | 12.72017 | 0.971914 | H | -1.4560895 | 10.225799  | 7.5387039 |
| C | -3.02719 | 10.69169 | -5.09822 | H | 4.6782196  | 1.2207657  | 0.6908993 |
| C | -3.87938 | 7.214254 | -3.64041 | H | 4.3498639  | 2.8331854  | 0.0165144 |
| O | -4.05142 | 10.92693 | -5.69984 | H | 3.1877072  | 2.0898749  | 1.1036729 |
| O | -1.92911 | 11.47559 | -5.19349 | H | 0.7836346  | 2.6843584  | -3.459605 |
| O | -2.79934 | 6.664755 | -4.24529 | H | 2.9649134  | -2.4244195 | -3.226826 |
| O | -4.61394 | 6.586682 | -2.91338 | H | -0.0488899 | 15.452551  | 5.3377502 |
| O | 1.116984 | 3.88106  | -2.34721 | H | -0.0301742 | 14.582645  | 3.7873742 |
| O | -2.27799 | 11.21132 | 2.872545 | H | -1.5323029 | 15.272691  | 4.3813292 |
| C | 1.755019 | 1.183112 | -2.85748 | H | -0.5801087 | 11.481468  | 9.2748175 |
| C | 2.114774 | -0.14509 | -3.10434 | H | -2.3102884 | 10.146538  | 4.1614234 |

---

**NImag**

0

**$\Sigma$  Electronic and thermal Free Energy**

-1865701.501

**mol Fraction**

0.155673243

---

**(8S, 13S, 8aS, 12aS, 13aS)-Diazaphilonic acid (2) - Conformer 2**

| Atom | X        | Y        | Z        | Atom | X        | Y        | Z        |
|------|----------|----------|----------|------|----------|----------|----------|
| C    | 1.878123 | 6.905756 | -1.68283 | C    | 2.206257 | -1.18296 | -1.99861 |
| C    | 0.5663   | 7.273775 | -1.60523 | C    | 2.805802 | -0.53273 | -0.90797 |
| C    | -0.42401 | 6.477508 | -0.89183 | C    | 2.575412 | 0.812034 | -0.65815 |
| C    | -0.04707 | 5.211726 | -0.20853 | C    | -0.4956  | 13.53449 | 5.364654 |
| C    | 1.461961 | 4.928661 | -0.08143 | C    | -0.17319 | 13.4823  | 6.712365 |
| C    | 2.380487 | 5.682218 | -1.08534 | C    | -0.49893 | 12.36273 | 7.495384 |
| C    | 0.023163 | 8.45729  | -2.24427 | C    | -1.13438 | 11.26535 | 6.932233 |
| C    | -1.28625 | 8.769803 | -2.16726 | C    | -1.46016 | 11.28102 | 5.572476 |
| O    | -2.17212 | 7.994534 | -1.45695 | C    | 3.293031 | 1.431468 | 0.520625 |
| C    | -1.71582 | 6.872019 | -0.85641 | O    | 0.358431 | 1.487207 | -3.55673 |
| C    | -1.9618  | 9.936537 | -2.85599 | O    | 2.485286 | -2.50486 | -2.15375 |
| C    | -2.97368 | 10.63053 | -1.95763 | C    | -0.07522 | 14.76973 | 4.599293 |
| C    | -4.29832 | 10.45508 | -2.17924 | O    | -0.14951 | 12.41056 | 8.80848  |
| C    | -4.94722 | 9.656552 | -3.2668  | O    | -2.0544  | 10.17687 | 5.094626 |
| C    | -3.96024 | 8.836687 | -4.11087 | H    | 2.591785 | 7.49288  | -2.25301 |
| C    | -2.58451 | 9.525621 | -4.22895 | H    | 0.683786 | 9.10513  | -2.81195 |
| C    | -2.51319 | 11.478   | -0.85695 | H    | -2.50076 | 6.325407 | -0.34899 |
| C    | -3.57931 | 12.08182 | -0.07001 | H    | -1.16284 | 10.64789 | -3.08336 |
| C    | -4.87198 | 11.83989 | -0.37649 | H    | -5.49262 | 10.35427 | -3.91287 |
| O    | -5.25912 | 11.0594  | -1.40401 | H    | -5.68727 | 8.986348 | -2.81738 |
| C    | -1.19819 | 11.69621 | -0.55225 | H    | -4.36419 | 8.778607 | -5.12948 |
| C    | -0.77093 | 12.51803 | 0.566358 | H    | -1.87906 | 8.845571 | -4.71831 |
| C    | -1.82856 | 13.4079  | 1.271465 | H    | -5.70663 | 12.25022 | 0.177997 |
| C    | -3.29076 | 12.96075 | 1.094348 | H    | -0.39517 | 11.20787 | -1.09094 |
| O    | -1.51154 | 13.51333 | 2.66826  | H    | -1.92881 | 14.85714 | -0.35211 |
| C    | -1.59415 | 12.36351 | 3.367542 | H    | -2.39666 | 15.49341 | 1.245518 |
| C    | -1.17142 | 12.42549 | 4.764256 | H    | -0.67365 | 15.18374 | 0.865681 |
| C    | -1.69955 | 14.83632 | 0.71845  | H    | 1.742902 | 6.380007 | 1.51897  |
| O    | 1.704155 | 3.515906 | -0.1875  | H    | 1.306094 | 4.741547 | 2.066805 |
| C    | 1.357824 | 2.953937 | -1.36102 | H    | 2.958241 | 5.082469 | 1.46428  |
| C    | 1.711198 | 1.546125 | -1.53016 | H    | -1.68482 | 12.14612 | -5.87482 |
| C    | 1.896075 | 5.310313 | 1.342896 | H    | -2.91749 | 5.793157 | -3.93296 |
| O    | -0.87003 | 4.473832 | 0.302059 | H    | 0.925654 | -0.9617  | -3.73668 |
| O    | 3.511828 | 5.254486 | -1.27575 | H    | 3.463962 | -1.10783 | -0.2657  |
| O    | -4.16872 | 13.39015 | 1.821042 | H    | 0.346305 | 14.30742 | 7.187447 |
| O    | 0.396916 | 12.59814 | 0.926363 | H    | -1.38042 | 10.37986 | 7.511505 |

|                                                               |          |          |          |   |          |             |          |
|---------------------------------------------------------------|----------|----------|----------|---|----------|-------------|----------|
| C                                                             | -2.70191 | 10.7356  | -5.15743 | H | 4.003929 | 0.713243    | 0.938964 |
| C                                                             | -3.89473 | 7.381192 | -3.65112 | H | 3.835842 | 2.3352      | 0.229374 |
| O                                                             | -3.69033 | 11.05194 | -5.78134 | H | 2.593669 | 1.723573    | 1.310111 |
| O                                                             | -1.53482 | 11.4132  | -5.24761 | H | 0.325564 | 2.4452      | -3.30434 |
| O                                                             | -2.86061 | 6.722646 | -4.22666 | H | 2.021738 | -2.83695    | -2.93901 |
| O                                                             | -4.69558 | 6.838508 | -2.92579 | H | 0.537958 | 15.41001    | 5.239794 |
| O                                                             | 0.75073  | 3.628268 | -2.20876 | H | 0.501028 | 14.51123    | 3.706303 |
| O                                                             | -2.03391 | 11.34342 | 2.814258 | H | -0.94028 | 15.34825    | 4.260713 |
| C                                                             | 1.144614 | 0.873316 | -2.65771 | H | -0.41981 | 11.58401    | 9.239328 |
| C                                                             | 1.383932 | -0.48705 | -2.87358 | H | -2.18471 | 10.3121     | 4.121751 |
| <b>NImag</b>                                                  |          |          |          |   |          | 0           |          |
| <b><math>\Sigma</math> Electronic and thermal Free Energy</b> |          |          |          |   |          | -1865701.5  |          |
| <b>mol Fraction</b>                                           |          |          |          |   |          | 0.155343476 |          |

**(8S, 13S, 8aS, 12aS, 13aS)-Diazaphilonic acid (2) - Conformer 3**

| Atom | X          | Y         | Z          | Atom | X          | Y          | Z          |
|------|------------|-----------|------------|------|------------|------------|------------|
| C    | 1.8650218  | 7.0938912 | -1.4904758 | C    | 2.5288078  | -0.9667249 | -1.9605241 |
| C    | 0.5374408  | 7.4087054 | -1.4629628 | C    | 3.054547   | -0.3183517 | -0.8313787 |
| C    | -0.4501651 | 6.5585534 | -0.8106032 | C    | 2.7601478  | 1.0104431  | -0.5639557 |
| C    | -0.0528639 | 5.2932763 | -0.1379855 | C    | -1.0709795 | 13.465144  | 5.5819968  |
| C    | 1.4593737  | 5.0663113 | 0.0493296  | C    | -0.8049169 | 13.395376  | 6.9411684  |
| C    | 2.3895455  | 5.8776035 | -0.8972174 | C    | -1.1194333 | 12.246856  | 7.6859078  |
| C    | -0.024408  | 8.5843251 | -2.1003993 | C    | -1.6861872 | 11.138585  | 7.0729514  |
| C    | -1.3473469 | 8.8438034 | -2.0745383 | C    | -1.9536417 | 11.172018  | 5.7008489  |
| O    | -2.2313909 | 8.0187533 | -1.4202396 | C    | 3.4012325  | 1.6307186  | 0.6577048  |
| C    | -1.7570067 | 6.9015599 | -0.8237998 | O    | 0.6444595  | 1.6638621  | -3.5421191 |
| C    | -2.0385618 | 9.9986332 | -2.7677604 | O    | 2.8667569  | -2.2729195 | -2.1307749 |
| C    | -3.1149257 | 10.63236  | -1.900353  | C    | -0.6672647 | 14.73244   | 4.8613714  |
| C    | -4.4207939 | 10.410515 | -2.1833323 | O    | -0.8288962 | 12.278813  | 9.0137521  |
| C    | -4.9900467 | 9.6120812 | -3.3146758 | O    | -2.4826345 | 10.056665  | 5.1747436  |
| C    | -3.9358485 | 8.8504874 | -4.1316475 | H    | 2.5786268  | 7.7210988  | -2.0163172 |
| C    | -2.5848711 | 9.5948545 | -4.1749799 | H    | 0.6337163  | 9.2700504  | -2.6248426 |
| C    | -2.7362513 | 11.472131 | -0.76319   | H    | -2.540669  | 6.3134628  | -0.3629281 |
| C    | -3.8583979 | 12.016186 | -0.011326  | H    | -1.259501  | 10.745419  | -2.9450609 |
| C    | -5.1260464 | 11.731065 | -0.3790527 | H    | -5.534549  | 10.302466  | -3.9693279 |
| O    | -5.4372957 | 10.959359 | -1.4385055 | H    | -5.7214215 | 8.9036091  | -2.9122093 |
| C    | -1.4452891 | 11.734424 | -0.3967149 | H    | -4.2931117 | 8.7997375  | -5.1679548 |
| C    | -1.0995391 | 12.546861 | 0.7563816  | H    | -1.8324739 | 8.9540004  | -4.6469957 |
| C    | -2.2210863 | 13.378865 | 1.4327984  | H    | -5.999423  | 12.096039  | 0.1467496  |
| C    | -3.6553616 | 12.879328 | 1.1825222  | H    | -0.6010637 | 11.289907  | -0.9097427 |
| O    | -1.9688165 | 13.46512  | 2.8440091  | H    | -2.3090847 | 14.859212  | -0.163195  |
| C    | -2.0356341 | 12.29755  | 3.5149934  | H    | -2.8701271 | 15.440782  | 1.4252585  |
| C    | -1.6760068 | 12.344559 | 4.9298512  | H    | -1.1214188 | 15.206915  | 1.1149513  |
| C    | -2.1254008 | 14.823291 | 0.915721   | H    | 1.6130102  | 6.4908372  | 1.6906027  |
| O    | 1.7620525  | 3.6668311 | -0.0755785 | H    | 1.2186491  | 4.8246183  | 2.1842367  |
| C    | 1.4892871  | 3.1185051 | -1.2746971 | H    | 2.8803288  | 5.2431355  | 1.662196   |
| C    | 1.9055394  | 1.7297242 | -1.457485  | H    | -1.7200828 | 12.28461   | -5.7249866 |
| C    | 1.8161461  | 5.4321821 | 1.4990493  | H    | -2.781328  | 5.8465404  | -3.9717247 |
| O    | -0.8669921 | 4.5125563 | 0.3204106  | H    | 1.3162167  | -0.7564147 | -3.7480519 |
| O    | 3.5441587  | 5.4985872 | -1.0467329 | H    | 3.7069738  | -0.8816712 | -0.1730222 |
| O    | -4.5801376 | 13.257917 | 1.8787599  | H    | -0.3393351 | 14.22913   | 7.4554533  |
| O    | 0.0476266  | 12.664118 | 1.1688602  | H    | -1.9216429 | 10.231535  | 7.6225006  |

|                                                               |            |            |            |   |            |              |            |
|---------------------------------------------------------------|------------|------------|------------|---|------------|--------------|------------|
| C                                                             | -2.7103426 | 10.820067  | -5.0821619 | H | 4.1217873  | 0.9316104    | 1.0916124  |
| C                                                             | -3.8322478 | 7.3886123  | -3.699947  | H | 3.9193495  | 2.5613651    | 0.4093816  |
| O                                                             | -3.6830779 | 11.11222   | -5.7415153 | H | 2.6575711  | 1.8773254    | 1.4218254  |
| O                                                             | -1.5680708 | 11.543926  | -5.1074384 | H | 0.5625106  | 2.6138772    | -3.271437  |
| O                                                             | -2.7489335 | 6.7839381  | -4.2431748 | H | 2.4509529  | -2.6050484   | -2.9423071 |
| O                                                             | -4.6413326 | 6.7989618  | -3.0219477 | H | -0.1077805 | 15.38139     | 5.5410981  |
| O                                                             | 0.8928186  | 3.7876352  | -2.1340033 | H | -0.0435892 | 14.516343    | 3.9892168  |
| O                                                             | -2.4103942 | 11.273857  | 2.9219696  | H | -1.5391861 | 15.284635    | 4.497399   |
| C                                                             | 1.4152171  | 1.0609366  | -2.6225314 | H | -1.0845427 | 11.433024    | 9.4152076  |
| C                                                             | 1.7176959  | -0.2838512 | -2.8560058 | H | -2.5762898 | 10.208488    | 4.2001041  |
| <b>NImag</b>                                                  |            |            |            |   |            | 0            |            |
| <b><math>\Sigma</math> Electronic and thermal Free Energy</b> |            |            |            |   |            | -1865701.501 |            |
| <b>mol Fraction</b>                                           |            |            |            |   |            | 0.155508272  |            |

**(8S, 13S, 8aS, 12aS, 13aS)-Diazaphilonic acid (2) - Conformer 4**

| Atom | X          | Y         | Z          | Atom | X          | Y          | Z          |
|------|------------|-----------|------------|------|------------|------------|------------|
| C    | 1.7509996  | 6.9048093 | -1.7042693 | C    | 2.9641264  | -0.8140829 | -2.2843176 |
| C    | 0.4395451  | 7.2780669 | -1.5801883 | C    | 1.6201532  | -0.5914322 | -2.6202021 |
| C    | -0.5323421 | 6.4784794 | -0.8487235 | C    | 1.0372958  | 0.6483843  | -2.3980541 |
| C    | -0.1419399 | 5.2096581 | -0.1731474 | C    | -0.9192201 | 13.501227  | 5.4755451  |
| C    | 1.3654592  | 4.8989255 | -0.136514  | C    | -0.6249298 | 13.445716  | 6.8294561  |
| C    | 2.2334836  | 5.6550931 | -1.1721328 | C    | -0.9406824 | 12.312371  | 7.5967353  |
| C    | -0.1138332 | 8.4643771 | -2.1994519 | C    | -1.537483  | 11.204839  | 7.0115861  |
| C    | -1.4243899 | 8.7716861 | -2.1004468 | C    | -1.8340228 | 11.223789  | 5.6452369  |
| O    | -2.2913027 | 7.9952181 | -1.3742452 | C    | -0.4132388 | 0.8512687  | -2.773919  |
| C    | -1.8229825 | 6.8740471 | -0.7827331 | O    | 4.0226192  | 2.3882319  | -1.0150668 |
| C    | -2.1183701 | 9.9261864 | -2.7921367 | O    | 3.465044   | -2.0566487 | -2.5344007 |
| C    | -3.166517  | 10.584414 | -1.9098708 | C    | -0.5120942 | 14.752309  | 4.7289885  |
| C    | -4.4808641 | 10.367401 | -2.1549409 | O    | -0.6208773 | 12.357958  | 8.9172761  |
| C    | -5.0842405 | 9.547244  | -3.2528843 | O    | -2.3914476 | 10.10983   | 5.1463239  |
| C    | -4.0548846 | 8.7635663 | -4.0811899 | H    | 2.4455861  | 7.4888819  | -2.3000767 |
| C    | -2.7043664 | 9.5033076 | -4.1775928 | H    | 0.5338898  | 9.1133099  | -2.7804753 |
| C    | -2.751202  | 11.439408 | -0.7977047 | H    | -2.5960283 | 6.3267954  | -0.2581958 |
| C    | -3.8487185 | 12.009632 | -0.0294084 | H    | -1.3359648 | 10.661133  | -3.0016912 |
| C    | -5.1277835 | 11.730243 | -0.3602606 | H    | -5.6442277 | 10.225162  | -3.9073792 |
| O    | -5.4728304 | 10.940102 | -1.395805  | H    | -5.8065368 | 8.8505247  | -2.8149558 |
| C    | -1.4487573 | 11.690972 | -0.4663064 | H    | -4.4407626 | 8.689396   | -5.1057143 |
| C    | -1.0657403 | 12.51717  | 0.6652168  | H    | -1.968101  | 8.8523773  | -4.6610204 |
| C    | -2.1602051 | 13.375155 | 1.3534013  | H    | -5.9843763 | 12.114253  | 0.1793957  |
| C    | -3.6069312 | 12.892763 | 1.1425751  | H    | -0.6222387 | 11.227954  | -0.9920696 |
| O    | -1.8756879 | 13.477655 | 2.7573694  | H    | -2.2619524 | 14.833677  | -0.2617659 |
| C    | -1.9457511 | 12.320583 | 3.4462936  | H    | -2.7799362 | 15.445799  | 1.3297866  |
| C    | -1.5551707 | 12.381276 | 4.8521036  | H    | -1.0418915 | 15.1823    | 0.9852729  |
| C    | -2.0552905 | 14.810441 | 0.8133529  | H    | 1.7532019  | 6.3000775  | 1.4915818  |
| O    | 1.6070784  | 3.5000869 | -0.3149467 | H    | 1.3156853  | 4.6496295  | 2.0048033  |
| C    | 1.1830466  | 2.990101  | -1.5162382 | H    | 2.9418701  | 4.9833639  | 1.3399065  |
| C    | 1.8022407  | 1.6859673 | -1.7986798 | H    | -1.8765911 | 12.168062  | -5.7896279 |
| C    | 1.8800185  | 5.2346786 | 1.2739128  | H    | -2.8826787 | 5.7668755  | -3.8678417 |
| O    | -0.9457787 | 4.5065589 | 0.4096988  | H    | 4.7900622  | 0.059135   | -1.5069261 |
| O    | 3.3282282  | 5.1692923 | -1.4688813 | H    | 1.0485257  | -1.4062537 | -3.0516318 |
| O    | -4.5108063 | 13.29836  | 1.8508125  | H    | -0.1357009 | 14.279012  | 7.3220664  |
| O    | 0.0921658  | 12.624781 | 1.0491408  | H    | -1.7747839 | 10.309098  | 7.5785886  |

|                                                               |            |           |            |   |            |              |            |
|---------------------------------------------------------------|------------|-----------|------------|---|------------|--------------|------------|
| C                                                             | -2.8520579 | 10.714751 | -5.0996882 | H | -0.8597489 | -0.0970738   | -3.086295  |
| C                                                             | -3.9396883 | 7.3119662 | -3.6164234 | H | -0.9997554 | 1.2489624    | -1.9387198 |
| O                                                             | -3.8408694 | 10.996764 | -5.7389554 | H | -0.5107707 | 1.5707592    | -3.5927193 |
| O                                                             | -1.7103062 | 11.436889 | -5.1644205 | H | 3.6355344  | 3.291383     | -1.01129   |
| O                                                             | -2.8649513 | 6.6972491 | -4.1645625 | H | 4.39425    | -2.0827984   | -2.2563085 |
| O                                                             | -4.7329672 | 6.7395293 | -2.905835  | H | 0.0716304  | 15.401688    | 5.3875678  |
| O                                                             | 0.3905786  | 3.6025648 | -2.2126607 | H | 0.0893644  | 14.51497     | 3.8468009  |
| O                                                             | -2.3487131 | 11.294894 | 2.8753434  | H | -1.383216  | 15.312929    | 4.3761373  |
| C                                                             | 3.1720241  | 1.4600429 | -1.4951961 | H | -0.8802375 | 11.521767    | 9.336116   |
| C                                                             | 3.7375954  | 0.2016998 | -1.7367066 | H | -2.5037184 | 10.249353    | 4.1719358  |
| <b>NImag</b>                                                  |            |           |            |   |            | 0            |            |
| <b><math>\Sigma</math> Electronic and thermal Free Energy</b> |            |           |            |   |            | -1865699.117 |            |
| <b>mol Fraction</b>                                           |            |           |            |   |            | 0.002769472  |            |



**(8S, 13S, 8aS, 12aS, 13aS)-Diazaphilonic acid (2) - Conformer 5**

| Atom | X          | Y         | Z          | Atom | X          | Y          | Z          |
|------|------------|-----------|------------|------|------------|------------|------------|
| C    | 1.9330793  | 7.1416736 | -1.5508266 | C    | 2.7061205  | -0.8960355 | -2.2125702 |
| C    | 0.60127    | 7.4374467 | -1.5317678 | C    | 3.2008266  | -0.2745829 | -1.0545744 |
| C    | -0.3820038 | 6.5584474 | -0.9116604 | C    | 2.8871299  | 1.0431384  | -0.7564528 |
| C    | 0.025263   | 5.2824463 | -0.2653019 | C    | -1.9907689 | 11.413434  | 5.9322525  |
| C    | 1.5381172  | 5.0716969 | -0.0647146 | C    | -1.3832713 | 11.484906  | 7.1782135  |
| C    | 2.4678119  | 5.9186081 | -0.9799078 | C    | -0.1954614 | 12.211981  | 7.348288   |
| C    | 0.0304715  | 8.6206564 | -2.1474198 | C    | 0.4005499  | 12.861931  | 6.2743723  |
| C    | -1.2960899 | 8.8611185 | -2.1303454 | C    | -0.1959481 | 12.812105  | 5.0085808  |
| O    | -2.1762311 | 8.0089855 | -1.5065467 | C    | 3.4946364  | 1.633937   | 0.496518   |
| C    | -1.6931097 | 6.8837568 | -0.9314297 | O    | 0.8262826  | 1.7583845  | -3.7589782 |
| C    | -1.995779  | 10.023674 | -2.8022729 | O    | 3.061513   | -2.1932951 | -2.4120045 |
| C    | -3.093133  | 10.616677 | -1.9316374 | C    | -3.268869  | 10.619125  | 5.7852898  |
| C    | -4.3928084 | 10.377849 | -2.2356297 | O    | 0.3412167  | 12.233104  | 8.6007467  |
| C    | -4.9335302 | 9.5994743 | -3.3943923 | O    | 0.4912365  | 13.426741  | 4.0243858  |
| C    | -3.8562426 | 8.8799307 | -4.2193094 | H    | 2.6442466  | 7.7909805  | -2.0526227 |
| C    | -2.5188404 | 9.6494238 | -4.2264156 | H    | 0.6849838  | 9.3274246  | -2.6480116 |
| C    | -2.7455461 | 11.430981 | -0.769378  | H    | -2.4738072 | 6.2745083  | -0.4936915 |
| C    | -3.8832391 | 11.933825 | -0.0151469 | H    | -1.2265629 | 10.786806  | -2.950465  |
| C    | -5.1413571 | 11.636014 | -0.4060346 | H    | -5.4835953 | 10.297494  | -4.0361164 |
| O    | -5.4246579 | 10.88742  | -1.4887624 | H    | -5.6557349 | 8.8670409  | -3.0191507 |
| C    | -1.4578814 | 11.699975 | -0.3799227 | H    | -4.2010815 | 8.8514753  | -5.2606263 |
| C    | -1.1582894 | 12.450952 | 0.8146755  | H    | -1.7493734 | 9.0354345  | -4.7063832 |
| C    | -2.2830429 | 13.267341 | 1.4896835  | H    | -6.0271425 | 11.971759  | 0.1184067  |
| C    | -3.7116389 | 12.776853 | 1.2016327  | H    | -0.6029267 | 11.270474  | -0.8872921 |
| O    | -2.0139412 | 13.300047 | 2.892591   | H    | -2.3593631 | 14.799862  | -0.0639111 |
| C    | -2.0742676 | 12.077024 | 3.5170498  | H    | -2.9368737 | 15.321639  | 1.540467   |
| C    | -1.4175773 | 12.108868 | 4.83287    | H    | -1.1868749 | 15.114     | 1.2389765  |
| C    | -2.1846761 | 14.727819 | 1.0145686  | H    | 1.6528539  | 6.4575141  | 1.6127049  |
| O    | 1.8612504  | 3.6799491 | -0.2201337 | H    | 1.275401   | 4.7745916  | 2.0606049  |
| C    | 1.6108404  | 3.1583813 | -1.4360875 | H    | 2.9372184  | 5.2278037  | 1.5691845  |
| C    | 2.0443702  | 1.7792129 | -1.6478413 | H    | -1.683108  | 12.393773  | -5.694678  |
| C    | 1.872593   | 5.4066992 | 1.3977405  | H    | -2.6491822 | 5.8936199  | -4.1266368 |
| O    | -0.7834589 | 4.479479  | 0.1630239  | H    | 1.5284439  | -0.6477054 | -4.0184587 |
| O    | 3.6294457  | 5.5603223 | -1.1243013 | H    | 3.8444579  | -0.8500334 | -0.3980765 |
| O    | -4.6562427 | 13.159805 | 1.8663881  | H    | -1.8160488 | 10.984579  | 8.0379648  |
| O    | -0.0265101 | 12.513857 | 1.3022563  | H    | 1.3411727  | 13.395869  | 6.3789959  |

|                                                               |            |            |            |   |            |              |            |
|---------------------------------------------------------------|------------|------------|------------|---|------------|--------------|------------|
| C                                                             | -2.6565216 | 10.897345  | -5.1004331 | H | 4.2083068  | 0.9272338    | 0.9294219  |
| C                                                             | -3.7314217 | 7.4086878  | -3.8260879 | H | 4.0136439  | 2.5732956    | 0.2856511  |
| O                                                             | -3.6293578 | 11.193208  | -5.7578639 | H | 2.7311926  | 1.8566455    | 1.2483201  |
| O                                                             | -1.5252166 | 11.638416  | -5.0966187 | H | 0.7270238  | 2.6991479    | -3.4628733 |
| O                                                             | -2.6310445 | 6.838686   | -4.3717061 | H | 2.6665345  | -2.5067784   | -3.241174  |
| O                                                             | -4.5383102 | 6.7873588  | -3.1743706 | H | -3.6170002 | 10.276872    | 6.7639902  |
| O                                                             | 1.0193902  | 3.8431618  | -2.2867366 | H | -4.0667587 | 11.211172    | 5.3241842  |
| O                                                             | -2.6172229 | 11.127857  | 2.9791064  | H | -3.1193941 | 9.7467652    | 5.1418385  |
| C                                                             | 1.5847813  | 1.1380801  | -2.8408105 | H | 1.1519294  | 12.765988    | 8.5868017  |
| C                                                             | 1.9065362  | -0.1964021 | -3.1054392 | H | 0.1273323  | 13.231302    | 3.1335685  |
| <b>NImag</b>                                                  |            |            |            |   |            | 0            |            |
| <b><math>\Sigma</math> Electronic and thermal Free Energy</b> |            |            |            |   |            | -1865698.699 |            |
| <b>mol Fraction</b>                                           |            |            |            |   |            | 0.001368293  |            |

**(8S, 13S, 8aS, 12aS, 13aS)-Diazaphilonic acid (2) - Conformer 6**

| Atom | X          | Y         | Z          | Atom | X          | Y          | Z          |
|------|------------|-----------|------------|------|------------|------------|------------|
| C    | 2.0659578  | 7.0216148 | -1.4590914 | C    | 3.4311179  | -0.6447338 | -2.3263252 |
| C    | 0.74452    | 7.3799129 | -1.4672952 | C    | 2.1323206  | -0.4106783 | -2.8027671 |
| C    | -0.2955924 | 6.5345745 | -0.8994055 | C    | 1.5127469  | 0.8111857  | -2.5805038 |
| C    | 0.029487   | 5.2314851 | -0.2551791 | C    | -1.4948976 | 13.181815  | 5.7202419  |
| C    | 1.5262186  | 4.9274813 | -0.0614521 | C    | -1.358286  | 13.050704  | 7.0938869  |
| C    | 2.4988458  | 5.7462782 | -0.9453996 | C    | -1.7473699 | 11.873888  | 7.7546523  |
| C    | 0.2520548  | 8.5964925 | -2.0792195 | C    | -2.2596763 | 10.798498  | 7.0431151  |
| C    | -1.0647918 | 8.8903893 | -2.1158749 | C    | -2.3966144 | 10.893788  | 5.6548169  |
| O    | -2.0003129 | 8.0690184 | -1.5397305 | C    | 0.1129678  | 1.0271627  | -3.1100893 |
| C    | -1.5899091 | 6.9185829 | -0.961543  | O    | 4.2971189  | 2.4856114  | -0.7651603 |
| C    | -1.6881581 | 10.078528 | -2.8177898 | O    | 3.9725574  | -1.8681955 | -2.5859576 |
| C    | -2.8391479 | 10.679578 | -2.0277133 | C    | -1.0187708 | 14.475405  | 5.0971486  |
| C    | -4.1136401 | 10.469659 | -2.4354643 | O    | -1.5827673 | 11.84574   | 9.1038344  |
| C    | -4.5760959 | 9.7102106 | -3.6402851 | O    | -2.879628  | 9.8072646  | 5.0329731  |
| C    | -3.4485272 | 8.9805399 | -4.3858962 | H    | 2.8175812  | 7.6425473  | -1.9366724 |
| C    | -2.1049126 | 9.7319646 | -4.2833731 | H    | 0.9546422  | 9.2810459  | -2.5439827 |
| C    | -2.56553   | 11.471998 | -0.8287025 | H    | -2.4116813 | 6.3380632  | -0.5616552 |
| C    | -3.7513026 | 11.991352 | -0.1622279 | H    | -0.8957591 | 10.828567  | -2.8936936 |
| C    | -4.9800825 | 11.724245 | -0.6544521 | H    | -5.064579  | 10.421344  | -4.3164483 |
| O    | -5.1935497 | 10.992622 | -1.7657086 | H    | -5.3358765 | 8.9858366  | -3.3289689 |
| C    | -1.3132428 | 11.71144  | -0.3348125 | H    | -3.7124237 | 8.9625896  | -5.4508344 |
| C    | -1.0735896 | 12.47377  | 0.8780562  | H    | -1.3099193 | 9.113622   | -4.7136428 |
| C    | -2.2505565 | 13.284976 | 1.4816078  | H    | -5.8978925 | 12.072078  | -0.197199  |
| C    | -3.657283  | 12.807461 | 1.0775458  | H    | -0.4259627 | 11.283771  | -0.7862298 |
| O    | -2.1314407 | 13.308593 | 2.9126491  | H    | -2.1826285 | 14.832886  | -0.0499807 |
| C    | -2.2665035 | 12.113654 | 3.5227229  | H    | -2.8884129 | 15.35013   | 1.5025497  |
| C    | -2.0415653 | 12.096035 | 4.9655069  | H    | -1.119142  | 15.116349  | 1.3478137  |
| C    | -2.1013126 | 14.749344 | 1.0388436  | H    | 1.7063455  | 6.2355539  | 1.6765757  |
| O    | 1.8037066  | 3.5424417 | -0.2887648 | H    | 1.2325249  | 4.556105   | 2.0422715  |
| C    | 1.5273707  | 3.0994772 | -1.5577721 | H    | 2.9204497  | 4.9362661  | 1.5902524  |
| C    | 2.1907536  | 1.8170354 | -1.8391811 | H    | -1.1283836 | 12.488554  | -5.6369947 |
| C    | 1.8703561  | 5.185035  | 1.4157126  | H    | -2.2728977 | 5.9830258  | -4.2055924 |
| O    | -0.8277226 | 4.4919048 | 0.1902653  | H    | 5.1443817  | 0.1927306  | -1.294674  |
| O    | 3.6263144  | 5.2842311 | -1.1399397 | H    | 1.6242391  | -1.2026653 | -3.3426128 |
| O    | -4.6417912 | 13.166984 | 1.6976963  | H    | -0.9388783 | 13.856997  | 7.6858161  |
| O    | 0.0308108  | 12.565674 | 1.3992041  | H    | -2.5504171 | 9.8707012  | 7.5276963  |

|                                                               |            |           |            |   |            |              |            |
|---------------------------------------------------------------|------------|-----------|------------|---|------------|--------------|------------|
| C                                                             | -2.1595639 | 10.993066 | -5.1472453 | H | -0.2830113 | 0.09571      | -3.5246932 |
| C                                                             | -3.3703519 | 7.505535  | -3.9926245 | H | -0.570819  | 1.3734155    | -2.3276169 |
| O                                                             | -3.0711699 | 11.305618 | -5.8802039 | H | 0.101966   | 1.7915759    | -3.8931387 |
| O                                                             | -1.0267224 | 11.723916 | -5.0385485 | H | 3.9013204  | 3.3849383    | -0.7557168 |
| O                                                             | -2.2321855 | 6.9288429 | -4.4458508 | H | 4.8636881  | -1.9050627   | -2.2038989 |
| O                                                             | -4.2334995 | 6.8893004 | -3.4119869 | H | -0.5222583 | 15.08899     | 5.8542141  |
| O                                                             | 0.813199   | 3.7462652 | -2.3059447 | H | -0.3170411 | 14.291707    | 4.278521   |
| O                                                             | -2.5885767 | 11.120094 | 2.8522547  | H | -1.8498126 | 15.051002    | 4.6779547  |
| C                                                             | 3.5189642  | 1.5816919 | -1.392059  | H | -1.8790306 | 10.985736    | 9.4422568  |
| C                                                             | 4.1238342  | 0.342359  | -1.6365838 | H | -2.8801424 | 10.001526    | 4.0614992  |
| <b>NImag</b>                                                  |            |           |            |   |            | 0            |            |
| <b><math>\Sigma</math> Electronic and thermal Free Energy</b> |            |           |            |   |            | -1865699.113 |            |
| <b>mol Fraction</b>                                           |            |           |            |   |            | 0.002754829  |            |

**(8S, 13S, 8aS, 12aS, 13aS)-Diazaphilonic acid (2) - Conformer 7**

| Atom | X          | Y         | Z          | Atom | X          | Y          | Z          |
|------|------------|-----------|------------|------|------------|------------|------------|
| C    | 2.063848   | 7.2293808 | -1.7989991 | C    | 3.1083871  | -0.7688491 | -2.5598098 |
| C    | 0.7242789  | 7.473824  | -1.7131546 | C    | 3.6347407  | -0.1358057 | -1.4222189 |
| C    | -0.193577  | 6.5541139 | -1.0531132 | C    | 3.2861801  | 1.1671788  | -1.0991238 |
| C    | 0.2928108  | 5.2908193 | -0.4371669 | C    | -1.6486979 | 11.299274  | 5.8986956  |
| C    | 1.8205468  | 5.1369629 | -0.3117525 | C    | -0.984076  | 11.385936  | 7.114153   |
| C    | 2.671751   | 6.0242639 | -1.2642987 | C    | 0.1819121  | 12.157272  | 7.2323824  |
| C    | 0.0796989  | 8.6380096 | -2.2910921 | C    | 0.6992823  | 12.836887  | 6.1362992  |
| C    | -1.2526307 | 8.8273723 | -2.2079641 | C    | 0.0438447  | 12.772425  | 4.9006734  |
| O    | -2.0684097 | 7.9383757 | -1.5491088 | C    | 3.9308813  | 1.7733893  | 0.1276291  |
| C    | -1.515499  | 6.8290581 | -1.0068798 | O    | 1.0567089  | 1.8209362  | -3.9932323 |
| C    | -2.027832  | 9.9663712 | -2.8359177 | O    | 3.5025556  | -2.0503903 | -2.7861721 |
| C    | -3.1031467 | 10.511558 | -1.9083902 | C    | -2.9010125 | 10.457004  | 5.8073615  |
| C    | -4.4060922 | 10.225004 | -2.1509006 | O    | 0.7780716  | 12.190809  | 8.4573661  |
| C    | -4.9727253 | 9.4335026 | -3.2881855 | O    | 0.6578534  | 13.419727  | 3.8894565  |
| C    | -3.9104029 | 8.7609523 | -4.1701973 | H    | 2.724578   | 7.9084573  | -2.3295164 |
| C    | -2.6051184 | 9.581151  | -4.2359591 | H    | 0.6817858  | 9.3723896  | -2.8170924 |
| C    | -2.7304602 | 11.331333 | -0.7578164 | H    | -2.2502636 | 6.1877351  | -0.5366542 |
| C    | -3.8482443 | 11.785272 | 0.0549036  | H    | -1.2962716 | 10.759293  | -3.0151286 |
| C    | -5.111735  | 11.442038 | -0.2769652 | H    | -5.5797399 | 10.113715  | -3.8968339 |
| O    | -5.4189009 | 10.690126 | -1.3508423 | H    | -5.6472526 | 8.6715358  | -2.8841128 |
| C    | -1.4364864 | 11.647207 | -0.4292025 | H    | -4.3042916 | 8.7258155  | -5.1937634 |
| C    | -1.1076967 | 12.401402 | 0.7556568  | H    | -1.8372284 | 9.000041   | -4.7575874 |
| C    | -2.2283287 | 13.169566 | 1.4912949  | H    | -5.9829866 | 11.740254  | 0.2925674  |
| C    | -3.6495869 | 12.626351 | 1.2689328  | H    | -0.5916007 | 11.25421   | -0.9810737 |
| O    | -1.8924966 | 13.203544 | 2.8796753  | H    | -2.4385719 | 14.708056  | -0.0439845 |
| C    | -1.8756406 | 11.975105 | 3.4961504  | H    | -2.9566464 | 15.196851  | 1.5907948  |
| C    | -1.1571584 | 12.023703 | 4.7786929  | H    | -1.2167834 | 15.058517  | 1.2031595  |
| C    | -2.2089266 | 14.635792 | 1.0241237  | H    | 1.9641178  | 6.5162061  | 1.3688634  |
| O    | 2.1883221  | 3.759553  | -0.4934599 | H    | 1.6730755  | 4.8174361  | 1.8214063  |
| C    | 1.899151   | 3.2360227 | -1.69994   | H    | 3.2905988  | 5.33686    | 1.2536568  |
| C    | 2.3739436  | 1.8757764 | -1.9431281 | H    | -1.9468233 | 12.364595  | -5.720818  |
| C    | 2.2128681  | 5.4758695 | 1.1353473  | H    | -2.5878506 | 5.8225482  | -4.1606464 |
| O    | -0.4630432 | 4.4549101 | 0.0234597  | H    | 1.8360823  | -0.555028  | -4.3048895 |
| O    | 3.8377425  | 5.7115939 | -1.4675554 | H    | 4.3307702  | -0.6901165 | -0.8019949 |
| O    | -4.5744578 | 12.968362 | 1.9819851  | H    | -1.3547115 | 10.863538  | 7.9896683  |
| O    | 0.0433663  | 12.504583 | 1.1881496  | H    | 1.6227703  | 13.406081  | 6.1995041  |

|                                                               |            |            |            |   |            |             |            |
|---------------------------------------------------------------|------------|------------|------------|---|------------|-------------|------------|
| C                                                             | -2.832529  | 10.828236  | -5.0922447 | H | 4.6909947  | 1.0919619   | 0.5201169  |
| C                                                             | -3.7107804 | 7.2931416  | -3.795464  | H | 4.4030342  | 2.7331492   | -0.1007469 |
| O                                                             | -3.8467382 | 11.090585  | -5.699458  | H | 3.1968939  | 1.9622684   | 0.9170865  |
| O                                                             | -1.7314059 | 11.612181  | -5.1371757 | H | 0.9361527  | 2.7553823   | -3.685232  |
| O                                                             | -2.6175493 | 6.7691487  | -4.3985587 | H | 3.0799924  | -2.3738427  | -3.5977272 |
| O                                                             | -4.4607727 | 6.6372495  | -3.1105076 | H | -3.1877093 | 10.095485   | 6.7989668  |
| O                                                             | 1.2415708  | 3.9027271  | -2.5156996 | H | -3.7425196 | 11.020461   | 5.3900825  |
| O                                                             | -2.407851  | 11.009266  | 2.9774488  | H | -2.7495928 | 9.5950654   | 5.1504323  |
| C                                                             | 1.8817123  | 1.224628   | -3.1175189 | H | 1.566057   | 12.754826   | 8.4085526  |
| C                                                             | 2.2405797  | -0.0950039 | -3.4076749 | H | 0.258781   | 13.215784   | 3.0157347  |
| <b>NImag</b>                                                  |            |            |            |   |            | 0           |            |
| <b><math>\Sigma</math> Electronic and thermal Free Energy</b> |            |            |            |   |            | -1865698.7  |            |
| <b>mol Fraction</b>                                           |            |            |            |   |            | 0.001369744 |            |

**(8S, 13S, 8aS, 12aS, 13aS)-Diazaphilonic acid (2) - Conformer 8**

| Atom | X          | Y         | Z          | Atom | X          | Y          | Z          |
|------|------------|-----------|------------|------|------------|------------|------------|
| C    | 1.7529645  | 6.7714275 | -1.5036975 | C    | 2.6576529  | -0.9695281 | -2.2856263 |
| C    | 0.452811   | 7.1972523 | -1.4567395 | C    | 1.3507138  | -0.6715941 | -2.7003149 |
| C    | -0.5994867 | 6.4196968 | -0.8185679 | C    | 0.8106687  | 0.5858893  | -2.4699238 |
| C    | -0.3092545 | 5.1161565 | -0.1584579 | C    | -2.1529358 | 11.453803  | 5.947108   |
| C    | 1.1775049  | 4.7361037 | -0.0340832 | C    | -1.5927248 | 11.495064  | 7.2162907  |
| C    | 2.1451257  | 5.4854775 | -0.9826696 | C    | -0.3674254 | 12.144032  | 7.4309385  |
| C    | -0.0072999 | 8.423692  | -2.0747245 | C    | 0.3129173  | 12.745105  | 6.3788596  |
| C    | -1.3082101 | 8.7826033 | -2.0569464 | C    | -0.2340702 | 12.724614  | 5.0901779  |
| O    | -2.2545759 | 8.024222  | -1.4162478 | C    | -0.6006993 | 0.870187   | -2.9322008 |
| C    | -1.8742976 | 6.8679334 | -0.8281133 | O    | 3.7716891  | 2.1322901  | -0.8285572 |
| C    | -1.9057943 | 9.9829801 | -2.7610386 | O    | 3.1175348  | -2.2248756 | -2.5494309 |
| C    | -2.99474   | 10.653075 | -1.9384958 | C    | -3.4735194 | 10.743733  | 5.7524992  |
| C    | -4.2948439 | 10.489067 | -2.2871338 | O    | 0.118355   | 12.139638  | 8.7039926  |
| C    | -4.8396351 | 9.7234881 | -3.45285   | O    | 0.5314975  | 13.284926  | 4.1316097  |
| C    | -3.7771044 | 8.9284482 | -4.2265524 | H    | 2.5107264  | 7.3419996  | -2.0317638 |
| C    | -2.3998756 | 9.623168  | -4.1991876 | H    | 0.7050855  | 9.060087   | -2.5903462 |
| C    | -2.6389476 | 11.457908 | -0.7726669 | H    | -2.7035178 | 6.3402185  | -0.3742036 |
| C    | -3.769241  | 12.042144 | -0.0678643 | H    | -1.0846127 | 10.694022  | -2.8885441 |
| C    | -5.0284274 | 11.818321 | -0.5023189 | H    | -5.3251174 | 10.440445  | -4.1249485 |
| O    | -5.3187957 | 11.072439 | -1.5854522 | H    | -5.6158764 | 9.040533   | -3.0923948 |
| C    | -1.3519966 | 11.646594 | -0.3367521 | H    | -4.0873485 | 8.8973847  | -5.2785717 |
| C    | -1.0491571 | 12.389806 | 0.8620929  | H    | -1.651003  | 8.9615847  | -4.6473285 |
| C    | -2.142502  | 13.285922 | 1.4857945  | H    | -5.9099634 | 12.216513  | -0.015798  |
| C    | -3.5887014 | 12.888831 | 1.145212   | H    | -0.5081988 | 11.157075  | -0.8075953 |
| O    | -1.9271559 | 13.313473 | 2.8981109  | H    | -2.0548736 | 14.805466  | -0.0798342 |
| C    | -2.0952129 | 12.10284  | 3.5273536  | H    | -2.6586271 | 15.379521  | 1.4967203  |
| C    | -1.4913562 | 12.10171  | 4.8683437  | H    | -0.9159789 | 15.052858  | 1.2665177  |
| C    | -1.9278264 | 14.73198  | 1.0052094  | H    | 1.5161381  | 6.0621316  | 1.666153   |
| O    | 1.3690529  | 3.3343196 | -0.2481262 | H    | 0.9733524  | 4.4173486  | 2.0886351  |
| C    | 1.0021652  | 2.8856034 | -1.4919317 | H    | 2.6535627  | 4.6979261  | 1.5444587  |
| C    | 1.5795387  | 1.5644679 | -1.782481  | H    | -1.3642551 | 12.302192  | -5.6604934 |
| C    | 1.6105621  | 4.9999674 | 1.4182373  | H    | -2.7227392 | 5.8874967  | -4.0176413 |
| O    | -1.1795533 | 4.4338711 | 0.3486057  | H    | 4.4645397  | -0.2117964 | -1.3571786 |
| O    | 3.2357654  | 4.9612869 | -1.2228908 | H    | 0.7733137  | -1.44281   | -3.1989515 |
| O    | -4.5306542 | 13.343431 | 1.7670807  | H    | -2.0916784 | 11.0308    | 8.0602553  |
| O    | 0.0647012  | 12.383063 | 1.3927038  | H    | 1.2816785  | 13.216978  | 6.5189558  |

|                                                               |            |            |            |   |            |              |            |
|---------------------------------------------------------------|------------|------------|------------|---|------------|--------------|------------|
| C                                                             | -2.4383983 | 10.866658  | -5.0892288 | H | -1.0677807 | -0.0448001   | -3.3075856 |
| C                                                             | -3.7454342 | 7.4609142  | -3.799302  | H | -1.2232661 | 1.2672273    | -2.1232247 |
| O                                                             | -3.3689378 | 11.205232  | -5.7858397 | H | -0.6103556 | 1.6204037    | -3.7289039 |
| O                                                             | -1.2700413 | 11.546588  | -5.0494116 | H | 3.4256612  | 3.051634     | -0.8142763 |
| O                                                             | -2.6530459 | 6.824794   | -4.283545  | H | 4.0235809  | -2.3054087   | -2.2117092 |
| O                                                             | -4.6093696 | 6.8979833  | -3.1680317 | H | -3.8826279 | 10.433183    | 6.718075   |
| O                                                             | 0.2847637  | 3.5581336  | -2.21418   | H | -4.2114671 | 11.382877    | 5.2558306  |
| O                                                             | -2.679451  | 11.188024  | 2.9731172  | H | -3.3558271 | 9.8580385    | 5.1207714  |
| C                                                             | 2.9142102  | 1.2630484  | -1.3984676 | H | 0.9623911  | 12.617919    | 8.7207019  |
| C                                                             | 3.4374962  | -0.0114316 | -1.6501168 | H | 0.1910225  | 13.107554    | 3.2280393  |
| <b>NImag</b>                                                  |            |            |            |   |            | 0            |            |
| <b><math>\Sigma</math> Electronic and thermal Free Energy</b> |            |            |            |   |            | -1865696.387 |            |
| <b>mol Fraction</b>                                           |            |            |            |   |            | 2.75E-05     |            |



**(8S, 13S, 8aS, 12aS, 13aS)-Diazaphilonic acid (2) - Conformer 9**

| Atom | X          | Y         | Z          | Atom | X          | Y          | Z          |
|------|------------|-----------|------------|------|------------|------------|------------|
| C    | 1.8479063  | 6.8605258 | -1.7400326 | C    | 3.0457346  | -0.8423481 | -2.5050227 |
| C    | 0.5368563  | 7.2282524 | -1.5991515 | C    | 1.6990747  | -0.6093856 | -2.8229383 |
| C    | -0.4277657 | 6.4132723 | -0.8749338 | C    | 1.1207111  | 0.6257112  | -2.5660124 |
| C    | -0.0293776 | 5.1333034 | -0.2251382 | C    | -1.6957052 | 11.464783  | 5.9358327  |
| C    | 1.4783742  | 4.8222447 | -0.209563  | C    | -1.0440809 | 11.548271  | 7.158439   |
| C    | 2.3366216  | 5.6009216 | -1.2365741 | C    | 0.163111   | 12.254084  | 7.2729929  |
| C    | -0.0240787 | 8.4241234 | -2.1933012 | C    | 0.7343735  | 12.870475  | 6.1663157  |
| C    | -1.3349963 | 8.7246286 | -2.0806417 | C    | 0.0935238  | 12.808036  | 4.9230348  |
| O    | -2.1947788 | 7.9335941 | -1.3621092 | C    | -0.3329188 | 0.8396903  | -2.9232899 |
| C    | -1.7188354 | 6.8037642 | -0.7924717 | O    | 4.1224795  | 2.3268937  | -1.1701335 |
| C    | -2.0381289 | 9.8871854 | -2.7498354 | O    | 3.54163    | -2.0794067 | -2.789208  |
| C    | -3.0914052 | 10.51924  | -1.8539947 | C    | -2.993522  | 10.693976  | 5.8490372  |
| C    | -4.4052538 | 10.292457 | -2.1011763 | O    | 0.7429246  | 12.288737  | 8.505591   |
| C    | -5.0008647 | 9.4873487 | -3.2142039 | O    | 0.7585773  | 13.388685  | 3.9035148  |
| C    | -3.9645203 | 8.7298747 | -4.0579511 | H    | 2.5369011  | 7.4570753  | -2.329968  |
| C    | -2.6222713 | 9.4857119 | -4.1424923 | H    | 0.61762    | 9.0845702  | -2.7680964 |
| C    | -2.6858486 | 11.355245 | -0.7269991 | H    | -2.4865264 | 6.2457755  | -0.2714883 |
| C    | -3.7852651 | 11.898032 | 0.0554817  | H    | -1.2622072 | 10.6324    | -2.9467609 |
| C    | -5.0620943 | 11.612131 | -0.2797399 | H    | -5.5676335 | 10.172623  | -3.8550006 |
| O    | -5.3989461 | 10.839112 | -1.3298741 | H    | -5.7159171 | 8.775522   | -2.7888866 |
| C    | -1.3796441 | 11.607348 | -0.3920925 | H    | -4.351461  | 8.6703545  | -5.0829962 |
| C    | -1.0215316 | 12.379736 | 0.7725862  | H    | -1.8798963 | 8.8520725  | -4.6391998 |
| C    | -2.1044555 | 13.234604 | 1.468168   | H    | -5.9216849 | 11.97722   | 0.2681462  |
| C    | -3.5526229 | 12.76871  | 1.2424228  | H    | -0.5523004 | 11.14964   | -0.9205952 |
| O    | -1.7847647 | 13.291005 | 2.8597378  | H    | -2.2042501 | 14.734974  | -0.115098  |
| C    | -1.8497633 | 12.082769 | 3.5121914  | H    | -2.7131954 | 15.302987  | 1.4967033  |
| C    | -1.1472524 | 12.126724 | 4.8034791  | H    | -0.9797317 | 15.051422  | 1.1384421  |
| C    | -1.9926879 | 14.682094 | 0.9578918  | H    | 1.8824749  | 6.1860842  | 1.4458957  |
| O    | 1.7174721  | 3.4276455 | -0.4224621 | H    | 1.4490998  | 4.5246736  | 1.9258299  |
| C    | 1.2793151  | 2.9453808 | -1.6301622 | H    | 3.0690091  | 4.8728562  | 1.2530744  |
| C    | 1.8932914  | 1.6475548 | -1.9493051 | H    | -1.8227669 | 12.187646  | -5.7062563 |
| C    | 2.0067027  | 5.1258483 | 1.2029301  | H    | -2.7599278 | 5.7422526  | -3.8978377 |
| O    | -0.8269999 | 4.4196791 | 0.3532832  | H    | 4.880525   | 0.0089784  | -1.7241327 |
| O    | 3.429031   | 5.1229237 | -1.553011  | H    | 1.1218998  | -1.4128036 | -3.2681266 |
| O    | -4.4647856 | 13.189488 | 1.9291229  | H    | -1.456493  | 11.073769  | 8.0424844  |
| O    | 0.1282729  | 12.430011 | 1.2172199  | H    | 1.6884636  | 13.386928  | 6.227794   |

|                                                               |            |           |            |   |            |              |            |
|---------------------------------------------------------------|------------|-----------|------------|---|------------|--------------|------------|
| C                                                             | -2.7843496 | 10.713742 | -5.0400278 | H | -0.7843284 | -0.1005694   | -3.2525645 |
| C                                                             | -3.8339086 | 7.2713017 | -3.6190068 | H | -0.910624  | 1.2196321    | -2.0738317 |
| O                                                             | -3.7792011 | 11.000786 | -5.6674592 | H | -0.4367648 | 1.5774578    | -3.724893  |
| O                                                             | -1.6484486 | 11.445555 | -5.096217  | H | 3.7366259  | 3.229846     | -1.1395431 |
| O                                                             | -2.7532214 | 6.6779505 | -4.1780339 | H | 4.473194   | -2.1143287   | -2.5200794 |
| O                                                             | -4.6212832 | 6.6791552 | -2.9181638 | H | -3.3141447 | 10.37834     | 6.8458906  |
| O                                                             | 0.4796456  | 3.5746967 | -2.3032587 | H | -3.7951129 | 11.292939    | 5.4035418  |
| O                                                             | -2.4319124 | 11.135394 | 3.0131801  | H | -2.883635  | 9.8061235    | 5.2189432  |
| C                                                             | 3.2654356  | 1.4119346 | -1.6640664 | H | 1.5633003  | 12.804186    | 8.4533915  |
| C                                                             | 3.8262813  | 0.1587836 | -1.9407161 | H | 0.3594342  | 13.184136    | 3.0301968  |
| <b>NImag</b>                                                  |            |           |            |   |            | 0            |            |
| <b><math>\Sigma</math> Electronic and thermal Free Energy</b> |            |           |            |   |            | -1865696.386 |            |
| <b>mol Fraction</b>                                           |            |           |            |   |            | 2.75E-05     |            |

**(8S, 13S, 8aS, 12aS, 13aS)-Diazaphilonic acid (2) - Conformer 10**

| Atom | X          | Y         | Z          | Atom | X          | Y          | Z          |
|------|------------|-----------|------------|------|------------|------------|------------|
| C    | 2.0141478  | 7.1450359 | -1.7276105 | C    | 2.7608938  | -0.9110351 | -2.1478283 |
| C    | 0.6864693  | 7.4423918 | -1.6218778 | C    | 3.3453681  | -0.2425194 | -1.0600604 |
| C    | -0.2471215 | 6.587015  | -0.9004571 | C    | 3.0493582  | 1.0853229  | -0.7897135 |
| C    | 0.2085376  | 5.3353356 | -0.2395229 | C    | -0.5712154 | 13.561018  | 5.4408546  |
| C    | 1.7324778  | 5.1309096 | -0.1431334 | C    | -0.2211852 | 13.511087  | 6.781742   |
| C    | 2.5912203  | 5.9431073 | -1.1542015 | C    | -0.4731489 | 12.36746   | 7.5571736  |
| C    | 0.0700166  | 8.6026595 | -2.236573  | C    | -1.0608356 | 11.244459  | 6.9926643  |
| C    | -1.252354  | 8.8447269 | -2.132152  | C    | -1.412514  | 11.257868  | 5.6393447  |
| O    | -2.0828208 | 8.0158567 | -1.4154593 | C    | 3.7549159  | 1.7282873  | 0.3837257  |
| C    | -1.5570025 | 6.9123446 | -0.836947  | O    | 0.7472002  | 1.67555    | -3.6400379 |
| C    | -2.0010382 | 9.9818293 | -2.7942933 | O    | 3.1060123  | -2.2145536 | -2.324103  |
| C    | -3.0308753 | 10.61146  | -1.8693247 | C    | -0.2304814 | 14.824907  | 4.6826902  |
| C    | -4.348407  | 10.368752 | -2.0687949 | O    | -0.1020477 | 12.419192  | 8.8641598  |
| C    | -4.9747993 | 9.5492413 | -3.1539253 | O    | -1.9570786 | 10.129329  | 5.1592729  |
| C    | -3.962171  | 8.7921616 | -4.0258452 | H    | 2.6851896  | 7.775358   | -2.303395  |
| C    | -2.6270544 | 9.5539807 | -4.1606018 | H    | 0.6849538  | 9.290775   | -2.808182  |
| C    | -2.594912  | 11.469822 | -0.7671006 | H    | -2.3025056 | 6.3193978  | -0.3221382 |
| C    | -3.6762925 | 12.007842 | 0.0463278  | H    | -1.2449256 | 10.736773  | -3.027559  |
| C    | -4.9599935 | 11.701351 | -0.2393706 | H    | -5.5682649 | 10.224354  | -3.7813855 |
| O    | -5.3248482 | 10.912834 | -1.2689151 | H    | -5.6699285 | 8.835858   | -2.69928   |
| C    | -1.2876902 | 11.753711 | -0.4837917 | H    | -4.3817398 | 8.7242931  | -5.0375305 |
| C    | -0.883199  | 12.584448 | 0.6367018  | H    | -1.896117  | 8.9176605  | -4.6709267 |
| C    | -1.9726572 | 13.409531 | 1.3715084  | H    | -5.8044657 | 12.060911  | 0.3351256  |
| C    | -3.4124535 | 12.887969 | 1.215632   | H    | -0.4704195 | 11.314354  | -1.0428471 |
| O    | -1.6354443 | 13.516128 | 2.7634729  | H    | -2.1791475 | 14.86925   | -0.2325286 |
| C    | -1.6444176 | 12.355924 | 3.4502892  | H    | -2.6497802 | 15.4624    | 1.3808049  |
| C    | -1.1993029 | 12.424703 | 4.8397094  | H    | -0.9203067 | 15.248096  | 0.9661775  |
| C    | -1.9291397 | 14.848764 | 0.8333808  | H    | 1.9665803  | 6.5770337  | 1.4694817  |
| O    | 2.0465777  | 3.7341947 | -0.2707615 | H    | 1.6267712  | 4.9117699  | 2.0051275  |
| C    | 1.7084903  | 3.1679697 | -1.4446428 | H    | 3.2471895  | 5.3461176  | 1.3770764  |
| C    | 2.1320038  | 1.7827048 | -1.6372144 | H    | -1.8971585 | 12.23632   | -5.7907771 |
| C    | 2.1724383  | 5.5189523 | 1.2776704  | H    | -2.7577587 | 5.8060679  | -3.9041237 |
| O    | -0.5648184 | 4.5493125 | 0.2767605  | H    | 1.4387756  | -0.7378637 | -3.8600863 |
| O    | 3.7396958  | 5.5778061 | -1.3702837 | H    | 4.04443    | -0.7893952 | -0.4366339 |
| O    | -4.297929  | 13.262528 | 1.9632401  | H    | 0.2633208  | 14.35709   | 7.2570678  |
| O    | 0.2853715  | 12.721919 | 0.9764218  | H    | -1.2492901 | 10.340994  | 7.5657422  |

|                                                               |            |            |            |   |            |              |            |
|---------------------------------------------------------------|------------|------------|------------|---|------------|--------------|------------|
| C                                                             | -2.8252923 | 10.766457  | -5.0718964 | H | 4.5099628  | 1.043768     | 0.7806693  |
| C                                                             | -3.8116649 | 7.3370352  | -3.5852489 | H | 4.2442608  | 2.6625449    | 0.0940403  |
| O                                                             | -3.8406753 | 11.037549  | -5.6734075 | H | 3.0557285  | 1.9743074    | 1.1889152  |
| O                                                             | -1.6970729 | 11.505235  | -5.1754997 | H | 0.6686926  | 2.627548     | -3.3753392 |
| O                                                             | -2.7552844 | 6.7405334  | -4.1873568 | H | 2.6462214  | -2.5616832   | -3.1050522 |
| O                                                             | -4.5692537 | 6.7446854  | -2.8523283 | H | 0.3605013  | 15.489384    | 5.3194009  |
| O                                                             | 1.0512891  | 3.8188812  | -2.2730965 | H | 0.3414151  | 14.606772    | 3.7762286  |
| O                                                             | -2.0403671 | 11.320231  | 2.8929226  | H | -1.13083   | 15.360966    | 4.3670151  |
| C                                                             | 1.5809052  | 1.0937895  | -2.7627097 | H | -0.3205878 | 11.57492     | 9.2899834  |
| C                                                             | 1.8872791  | -0.2495459 | -2.9994834 | H | -2.1124673 | 10.268141    | 4.1905884  |
| <b>NImag</b>                                                  |            |            |            |   |            | 0            |            |
| <b><math>\Sigma</math> Electronic and thermal Free Energy</b> |            |            |            |   |            | -1865701.501 |            |
| <b>mol Fraction</b>                                           |            |            |            |   |            | 0.155673243  |            |

**(8S, 13S, 8aS, 12aS, 13aS)-Diazaphilonic acid (2) - Conformer 11**

| Atom | X          | Y         | Z          | Atom | X          | Y          | Z          |
|------|------------|-----------|------------|------|------------|------------|------------|
| C    | 1.9979187  | 6.8727062 | -1.407304  | C    | 3.0193011  | -0.8361831 | -2.3492289 |
| C    | 0.694885   | 7.2901328 | -1.449538  | C    | 1.7467131  | -0.5322203 | -2.8561777 |
| C    | -0.3981616 | 6.4877924 | -0.9197388 | C    | 1.1809847  | 0.7148818  | -2.6311008 |
| C    | -0.1505296 | 5.1660962 | -0.2786332 | C    | -2.5153679 | 11.298704  | 5.852798   |
| C    | 1.3247973  | 4.7901529 | -0.0496198 | C    | -2.0565226 | 11.302944  | 7.1626909  |
| C    | 2.3578962  | 5.5733978 | -0.8963017 | C    | -0.8568419 | 11.951299  | 7.4928084  |
| C    | 0.2752001  | 8.5326721 | -2.0641272 | C    | -0.1009305 | 12.588807  | 6.5164759  |
| C    | -1.0258196 | 8.8840468 | -2.1375813 | C    | -0.5452314 | 12.606024  | 5.1888495  |
| O    | -2.0136117 | 8.1012695 | -1.5965259 | C    | -0.1919363 | 1.0061359  | -3.1939312 |
| C    | -1.6717021 | 6.9294219 | -1.0156833 | O    | 3.9925916  | 2.2249832  | -0.7160222 |
| C    | -1.5755743 | 10.102516 | -2.8495459 | O    | 3.5077342  | -2.0805273 | -2.6138356 |
| C    | -2.7307719 | 10.741039 | -2.0950809 | C    | -3.8111146 | 10.58811   | 5.5332718  |
| C    | -3.9982313 | 10.581341 | -2.5497922 | O    | -0.4721505 | 11.909378  | 8.7993013  |
| C    | -4.4440281 | 9.8497686 | -3.7777448 | O    | 0.2886196  | 13.20034   | 4.3111295  |
| C    | -3.318131  | 9.0843219 | -4.4891376 | H    | 2.7903327  | 7.4632208  | -1.8567264 |
| C    | -1.9525388 | 9.7848494 | -4.3323816 | H    | 1.0208781  | 9.1884634  | -2.5026022 |
| C    | -2.4736607 | 11.510971 | -0.8807405 | H    | -2.5298346 | 6.3836359  | -0.6444003 |
| C    | -3.6601759 | 12.067027 | -0.249382  | H    | -0.7524149 | 10.821499  | -2.8903219 |
| C    | -4.8796551 | 11.850437 | -0.7882293 | H    | -4.8802413 | 10.584909  | -4.4638406 |
| O    | -5.0784683 | 11.137329 | -1.9132963 | H    | -5.2412668 | 9.1522248  | -3.5007269 |
| C    | -1.2263347 | 11.692698 | -0.3394323 | H    | -3.5445552 | 9.0840651  | -5.5627763 |
| C    | -1.0241534 | 12.399611 | 0.9018272  | H    | -1.1658826 | 9.1412005  | -4.7400984 |
| C    | -2.1698606 | 13.270109 | 1.4648699  | H    | -5.7996355 | 12.228718  | -0.3605563 |
| C    | -3.5818181 | 12.876384 | 0.999559   | H    | -0.3444776 | 11.222598  | -0.7573417 |
| O    | -2.0661008 | 13.254503 | 2.8899097  | H    | -1.9712763 | 14.838336  | -0.0414828 |
| C    | -2.2734762 | 12.023829 | 3.4663003  | H    | -2.7011975 | 15.359641  | 1.4996359  |
| C    | -1.7764439 | 11.983755 | 4.849858   | H    | -0.943415  | 15.04936   | 1.397243   |
| C    | -1.9291779 | 14.731599 | 1.0474138  | H    | 1.5192405  | 6.0649812  | 1.7113242  |
| O    | 1.5431303  | 3.3966318 | -0.2903029 | H    | 0.9577279  | 4.405127   | 2.0399512  |
| C    | 1.2781389  | 2.9844615 | -1.572069  | H    | 2.6731433  | 4.7111981  | 1.6378847  |
| C    | 1.8863177  | 1.675772  | -1.856131  | H    | -0.8253929 | 12.512908  | -5.6255617 |
| C    | 1.640913   | 5.0114715 | 1.4395196  | H    | -2.2607071 | 6.0438024  | -4.2901816 |
| O    | -1.0526058 | 4.463896  | 0.1375532  | H    | 4.7421302  | -0.0982317 | -1.2591206 |
| O    | 3.468069   | 5.0627062 | -1.0657212 | H    | 1.2159214  | -1.2906468 | -3.4217357 |
| O    | -4.5730899 | 13.30639  | 1.5591355  | H    | -2.6163706 | 10.809691  | 7.9501205  |
| O    | 0.0447081  | 12.382196 | 1.5178555  | H    | 0.8502109  | 13.061157  | 6.7467009  |

|                                                               |            |           |            |   |            |              |            |
|---------------------------------------------------------------|------------|-----------|------------|---|------------|--------------|------------|
| C                                                             | -1.9303107 | 11.054981 | -5.184555  | H | -0.6209286 | 0.1010415    | -3.6333095 |
| C                                                             | -3.3091054 | 7.6045376 | -4.1053095 | H | -0.879166  | 1.3738012    | -2.4243391 |
| O                                                             | -2.8056351 | 11.410032 | -5.9418817 | H | -0.144994  | 1.7813022    | -3.9649879 |
| O                                                             | -0.7738692 | 11.73935  | -5.0321059 | H | 3.6395474  | 3.1416515    | -0.7010173 |
| O                                                             | -2.1774012 | 6.989176  | -4.5213011 | H | 4.3851149  | -2.1668115   | -2.2085839 |
| O                                                             | -4.2156112 | 7.0180837 | -3.5611706 | H | -4.292149  | 10.245214    | 6.4536898  |
| O                                                             | 0.6146576  | 3.6752884 | -2.3277975 | H | -4.512837  | 11.238632    | 5.000198   |
| O                                                             | -2.8054876 | 11.123812 | 2.839926   | H | -3.6374749 | 9.7233512    | 4.8856402  |
| C                                                             | 3.1889218  | 1.3693827 | -1.3776035 | H | 0.3643066  | 12.39128     | 8.8969746  |
| C                                                             | 3.7397714  | 0.1058605 | -1.6257455 | H | 0.0211982  | 13.049853    | 3.378575   |
| <b>NImag</b>                                                  |            |           |            |   |            | 0            |            |
| <b><math>\Sigma</math> Electronic and thermal Free Energy</b> |            |           |            |   |            | -1865696.384 |            |
| <b>mol Fraction</b>                                           |            |           |            |   |            | 2.74E-05     |            |

**(8S, 13S, 8aS, 12aS, 13aS)-Diazaphilonic acid (2) - Conformer 12**

| Atom | X          | Y         | Z          | Atom | X          | Y          | Z          |
|------|------------|-----------|------------|------|------------|------------|------------|
| C    | 1.8402998  | 6.8475265 | -1.7264503 | C    | 2.9586765  | -0.8664575 | -2.4993537 |
| C    | 0.5323907  | 7.2293836 | -1.5942248 | C    | 1.6169552  | -0.6180438 | -2.8263115 |
| C    | -0.4463467 | 6.4236267 | -0.8786799 | C    | 1.050374   | 0.6228064  | -2.5708417 |
| C    | -0.0667547 | 5.1380815 | -0.2286804 | C    | -1.7110507 | 11.477015  | 5.9341205  |
| C    | 1.4373359  | 4.8103508 | -0.2029811 | C    | -1.0677851 | 11.551729  | 7.1617002  |
| C    | 2.3114564  | 5.5815557 | -1.222215  | C    | 0.1458791  | 12.244607  | 7.2864565  |
| C    | -0.0110461 | 8.4325514 | -2.1899022 | C    | 0.7318808  | 12.856648  | 6.1850892  |
| C    | -1.3193712 | 8.7472184 | -2.0861385 | C    | 0.0997541  | 12.802892  | 4.9369367  |
| O    | -2.1929852 | 7.9642446 | -1.3754952 | C    | -0.3982359 | 0.8535005  | -2.9379799 |
| C    | -1.7336147 | 6.8281535 | -0.8047402 | O    | 4.0606075  | 2.2879794  | -1.1500297 |
| C    | -2.0048032 | 9.9187392 | -2.7580792 | O    | 3.4429809  | -2.1082957 | -2.7826744 |
| C    | -3.0580312 | 10.560245 | -1.8689005 | C    | -3.0162138 | 10.720046  | 5.836358   |
| C    | -4.3723288 | 10.348389 | -2.1266983 | O    | 0.716751   | 12.271241  | 8.5234123  |
| C    | -4.9680669 | 9.5522989 | -3.2461355 | O    | 0.7785298  | 13.378163  | 3.9234135  |
| C    | -3.9335621 | 8.7852175 | -4.0834038 | H    | 2.5400409  | 7.4376413  | -2.3101743 |
| C    | -2.5825297 | 9.526573  | -4.155997  | H    | 0.6420324  | 9.0870601  | -2.7586433 |
| C    | -2.6520832 | 11.389401 | -0.7369796 | H    | -2.5111265 | 6.2776167  | -0.2904308 |
| C    | -3.7515419 | 11.942565 | 0.0381709  | H    | -1.2194097 | 10.655981  | -2.9473362 |
| C    | -5.0287813 | 11.671317 | -0.3074794 | H    | -5.5221642 | 10.245156  | -3.8898553 |
| O    | -5.3659312 | 10.90421  | -1.3618516 | H    | -5.6942783 | 8.84755    | -2.828     |
| C    | -1.3458558 | 11.626553 | -0.391467  | H    | -4.3131385 | 8.7319727  | -5.1115338 |
| C    | -0.9883559 | 12.392834 | 0.777461   | H    | -1.8433633 | 8.8858569  | -4.6484099 |
| C    | -2.0673285 | 13.258119 | 1.4663486  | H    | -5.8885501 | 12.04461   | 0.2345689  |
| C    | -3.5186152 | 12.808217 | 1.2287422  | H    | -0.5194689 | 11.160889  | -0.9144926 |
| O    | -1.7576558 | 13.308859 | 2.8603631  | H    | -2.1390815 | 14.762132  | -0.115036  |
| C    | -1.8404105 | 12.100308 | 3.5103625  | H    | -2.6539605 | 15.332909  | 1.4939078  |
| C    | -1.1471753 | 12.134904 | 4.8069664  | H    | -0.9206739 | 15.063255  | 1.1482061  |
| C    | -1.9361645 | 14.705179 | 0.9594101  | H    | 1.8446682  | 6.16625    | 1.4581942  |
| O    | 1.6625254  | 3.413602  | -0.417119  | H    | 1.3894987  | 4.508777   | 1.9315081  |
| C    | 1.2277595  | 2.9386652 | -1.6289068 | H    | 3.0179315  | 4.8403402  | 1.2710665  |
| C    | 1.8297055  | 1.6348109 | -1.946467  | H    | -1.7420313 | 12.22311   | -5.7076186 |
| C    | 1.9588782  | 5.1051987 | 1.2138716  | H    | -2.7628565 | 5.7843174  | -3.92027   |
| O    | -0.876307  | 4.4321418 | 0.3425597  | H    | 4.7970928  | -0.0369665 | -1.703633  |
| O    | 3.4007666  | 5.0921759 | -1.5318642 | H    | 1.0341703  | -1.4141408 | -3.2773054 |
| O    | -4.4314145 | 13.237256 | 1.9094555  | H    | -1.4917985 | 11.080226  | 8.0418542  |
| O    | 0.1584624  | 12.429811 | 1.2309732  | H    | 1.6908481  | 13.36295   | 6.2545564  |

|                                                               |            |           |            |   |            |              |            |
|---------------------------------------------------------------|------------|-----------|------------|---|------------|--------------|------------|
| C                                                             | -2.7243559 | 10.758044 | -5.05228   | H | -0.8576279 | -0.0810766   | -3.272351  |
| C                                                             | -3.8222142 | 7.3244507 | -3.6464669 | H | -0.9777479 | 1.2381495    | -2.0918805 |
| O                                                             | -3.7109798 | 11.056675 | -5.6872596 | H | -0.4882349 | 1.5939215    | -3.7388139 |
| O                                                             | -1.5805026 | 11.478085 | -5.0976341 | H | 3.6845277  | 3.1950817    | -1.1204037 |
| O                                                             | -2.7438626 | 6.7204196 | -4.1985439 | H | 4.3721532  | -2.1540204   | -2.5069787 |
| O                                                             | -4.621194  | 6.7396134 | -2.9526567 | H | -3.3476921 | 10.406422    | 6.8302961  |
| O                                                             | 0.4399232  | 3.5781384 | -2.3063822 | H | -3.8080555 | 11.328052    | 5.3857143  |
| O                                                             | -2.4288243 | 11.159993 | 3.0054716  | H | -2.9109051 | 9.8319561    | 5.2058238  |
| C                                                             | 3.1971118  | 1.3835244 | -1.6520097 | H | 1.5428702  | 12.778105    | 8.4782046  |
| C                                                             | 3.7461258  | 0.1248662 | -1.9273685 | H | 0.3837689  | 13.17924     | 3.0468203  |
| <b>NImag</b>                                                  |            |           |            |   |            | 0            |            |
| <b><math>\Sigma</math> Electronic and thermal Free Energy</b> |            |           |            |   |            | -1865696.388 |            |
| <b>mol Fraction</b>                                           |            |           |            |   |            | 2.76E-05     |            |



**(8S, 13S, 8aS, 12aS, 13aS)-Diazaphilonic acid (2) - Conformer 13**

| Atom | X          | Y         | Z          | Atom | X          | Y          | Z          |
|------|------------|-----------|------------|------|------------|------------|------------|
| C    | 2.031977   | 7.1184142 | -2.0074787 | C    | 2.6773244  | -0.9580295 | -2.1098177 |
| C    | 0.7201395  | 7.4390263 | -1.8095537 | C    | 3.356665   | -0.2438364 | -1.1098023 |
| C    | -0.1614424 | 6.6286468 | -0.979168  | C    | 3.0924057  | 1.098378   | -0.8802736 |
| C    | 0.3323416  | 5.4007243 | -0.301481  | C    | -0.3769989 | 13.39234   | 5.3803781  |
| C    | 1.856887   | 5.1807359 | -0.3164978 | C    | -0.013071  | 13.32089   | 6.7166976  |
| C    | 2.6401166  | 5.934691  | -1.4290959 | C    | -0.3017623 | 12.184136  | 7.4892679  |
| C    | 0.0688843  | 8.5812796 | -2.4215602 | C    | -0.9408264 | 11.088796  | 6.9262038  |
| C    | -1.2392122 | 8.8449052 | -2.2258464 | C    | -1.307646  | 11.123855  | 5.5772653  |
| O    | -2.0188056 | 8.0569075 | -1.4120695 | C    | 3.8999593  | 1.7905621  | 0.1953578  |
| C    | -1.4584937 | 6.9750047 | -0.8260088 | O    | 0.5593828  | 1.5743287  | -3.550352  |
| C    | -2.0250498 | 9.9612192 | -2.8799289 | O    | 2.9984427  | -2.2720069 | -2.2511741 |
| C    | -3.0265213 | 10.602899 | -1.9306587 | C    | 0.0060248  | 14.645222  | 4.6241085  |
| C    | -4.3538852 | 10.419184 | -2.120637  | O    | 0.0867136  | 12.213385  | 8.7920877  |
| C    | -5.01824   | 9.6423996 | -3.2165817 | O    | -1.9025086 | 10.020676  | 5.0977675  |
| C    | -4.0403266 | 8.7907439 | -4.0337279 | H    | 2.6614733  | 7.7140471  | -2.6617622 |
| C    | -2.6802577 | 9.508353  | -4.2155434 | H    | 0.6446339  | 9.2395618  | -3.0647731 |
| C    | -2.5497092 | 11.433741 | -0.8231409 | H    | -2.1649757 | 6.4170907  | -0.2242193 |
| C    | -3.6027178 | 11.999188 | 0.0089688  | H    | -1.2964981 | 10.729935  | -3.1571647 |
| C    | -4.8997653 | 11.747883 | -0.2688425 | H    | -5.5377903 | 10.352048  | -3.8745787 |
| O    | -5.3039279 | 10.989343 | -1.3066507 | H    | -5.7868808 | 8.9996576  | -2.7762932 |
| C    | -1.2308666 | 11.669377 | -0.552323  | H    | -4.4615802 | 8.6428653  | -5.0347629 |
| C    | -0.7856524 | 12.467928 | 0.5765933  | H    | -1.9964062 | 8.8158919  | -4.720133  |
| C    | -1.8369099 | 13.324411 | 1.3302122  | H    | -5.7244449 | 12.132418  | 0.3180066  |
| C    | -3.2953652 | 12.854958 | 1.1857981  | H    | -0.4361304 | 11.215562  | -1.1314456 |
| O    | -1.481165  | 13.407585 | 2.7191534  | H    | -2.0073817 | 14.802445  | -0.2614756 |
| C    | -1.5224522 | 12.24316  | 3.3970344  | H    | -2.4415132 | 15.399686  | 1.3610192  |
| C    | -1.0577097 | 12.285774 | 4.7813609  | H    | -0.7249089 | 15.128085  | 0.9273008  |
| C    | -1.7483851 | 14.765327 | 0.8017442  | H    | 2.231694   | 6.6962437  | 1.2031237  |
| O    | 2.147128   | 3.7757505 | -0.4032713 | H    | 1.9204358  | 5.0618296  | 1.8413396  |
| C    | 1.7119621  | 3.1600816 | -1.5186253 | H    | 3.4896468  | 5.4460934  | 1.0675318  |
| C    | 2.1098417  | 1.7630392 | -1.6794072 | H    | -3.5659531 | 11.253871  | -6.7804842 |
| C    | 2.4120157  | 5.6279445 | 1.0454103  | H    | -2.9272868 | 5.7868649  | -3.685942  |
| O    | -0.4057993 | 4.6479489 | 0.3076924  | H    | 1.2151539  | -0.8541793 | -3.710172  |
| O    | 3.7634239  | 5.5431466 | -1.7194332 | H    | 4.1036341  | -0.7668521 | -0.5224995 |
| O    | -4.1589131 | 13.250423 | 1.9482469  | H    | 0.5112233  | 14.143905  | 7.1901764  |
| O    | 0.3896288  | 12.554197 | 0.909442   | H    | -1.1583529 | 10.190316  | 7.4968418  |

|                                                               |            |            |            |   |            |              |            |
|---------------------------------------------------------------|------------|------------|------------|---|------------|--------------|------------|
| C                                                             | -2.7922843 | 10.713716  | -5.1548409 | H | 4.6848353  | 1.1200164    | 0.556739   |
| C                                                             | -3.9243793 | 7.3738846  | -3.4704372 | H | 4.3646659  | 2.7068234    | -0.1797531 |
| O                                                             | -2.2069662 | 11.763984  | -5.0207965 | H | 3.2746805  | 2.0788397    | 1.0460493  |
| O                                                             | -3.5968548 | 10.459582  | -6.2135206 | H | 0.5109258  | 2.5390026    | -3.3274803 |
| O                                                             | -2.9091442 | 6.6923289  | -4.050907  | H | 2.4717622  | -2.65134     | -2.9726196 |
| O                                                             | -4.6775784 | 6.8770821  | -2.6660481 | H | 0.6339711  | 15.280155    | 5.2555901  |
| O                                                             | 0.9941118  | 3.7783127  | -2.3212749 | H | 0.5546672  | 14.408562    | 3.7079934  |
| O                                                             | -1.962035  | 11.2262    | 2.838025   | H | -0.8752661 | 15.2209      | 4.3248012  |
| C                                                             | 1.4610853  | 1.0266608  | -2.7194097 | H | -0.1604503 | 11.375954    | 9.2157333  |
| C                                                             | 1.7380742  | -0.3295579 | -2.9154414 | H | -2.0620778 | 10.170749    | 4.1313931  |
| <b>NImag</b>                                                  |            |            |            |   |            | 0            |            |
| <b><math>\Sigma</math> Electronic and thermal Free Energy</b> |            |            |            |   |            | -1865701.096 |            |
| <b>mol Fraction</b>                                           |            |            |            |   |            | 0.078477487  |            |

**(8S, 13S, 8aS, 12aS, 13aS)-Diazaphilonic acid (2) - Conformer 14**

| Atom | X          | Y         | Z          | Atom | X          | Y          | Z          |
|------|------------|-----------|------------|------|------------|------------|------------|
| C    | 1.8287166  | 7.0454057 | -1.5676377 | C    | 2.4413272  | -0.9976945 | -2.1068423 |
| C    | 0.5030578  | 7.3685364 | -1.5339279 | C    | 3.0048957  | -0.3471946 | -0.9959188 |
| C    | -0.4866268 | 6.5262975 | -0.8747873 | C    | 2.71601    | 0.9813861  | -0.7121419 |
| C    | -0.0944391 | 5.2602588 | -0.2008566 | C    | -1.0345583 | 13.460509  | 5.5010975  |
| C    | 1.4174754  | 5.0180864 | -0.0284864 | C    | -0.7633702 | 13.394793  | 6.8594778  |
| C    | 2.3479749  | 5.825981  | -0.9775014 | C    | -1.0832151 | 12.251921  | 7.6105755  |
| C    | -0.0541567 | 8.546338  | -2.171083  | C    | -1.6603889 | 11.145064  | 7.0048274  |
| C    | -1.3753689 | 8.8142119 | -2.1397226 | C    | -1.9331581 | 11.174364  | 5.633665   |
| O    | -2.2612644 | 7.9965454 | -1.4790088 | C    | 3.3999669  | 1.6016419  | 0.486173   |
| C    | -1.7912878 | 6.8778882 | -0.8821038 | O    | 0.5004468  | 1.631547   | -3.6144541 |
| C    | -2.062607  | 9.9712862 | -2.8330878 | O    | 2.710511   | -2.3015701 | -2.3850603 |
| C    | -3.130959  | 10.614182 | -1.9625387 | C    | -0.6246488 | 14.721638  | 4.7731885  |
| C    | -4.4394932 | 10.399617 | -2.2388476 | O    | -0.7871077 | 12.287615  | 8.9371319  |
| C    | -5.0189266 | 9.6013365 | -3.3650755 | O    | -2.4721671 | 10.060505  | 5.1145996  |
| C    | -3.9733134 | 8.8309173 | -4.1847759 | H    | 2.5433836  | 7.6675734  | -2.0979887 |
| C    | -2.6179347 | 9.5666742 | -4.2365698 | H    | 0.605765   | 9.2264245  | -2.7005702 |
| C    | -2.7417792 | 11.454881 | -0.8296648 | H    | -2.57644   | 6.2960132  | -0.4159108 |
| C    | -3.8569818 | 12.008443 | -0.0744368 | H    | -1.2797424 | 10.712682  | -3.0162027 |
| C    | -5.1280947 | 11.730117 | -0.4354345 | H    | -5.5623993 | 10.293099  | -4.0191323 |
| O    | -5.4490342 | 10.957062 | -1.4909364 | H    | -5.7526076 | 8.8984765  | -2.956989  |
| C    | -1.4474792 | 11.709881 | -0.4697122 | H    | -4.3356946 | 8.7794522  | -5.2192555 |
| C    | -1.0913448 | 12.523484 | 0.6793408  | H    | -1.8717949 | 8.9196801  | -4.710142  |
| C    | -2.2044143 | 13.36527  | 1.3576063  | H    | -5.9967308 | 12.102248  | 0.0932014  |
| C    | -3.6429968 | 12.874089 | 1.115643   | H    | -0.6084666 | 11.258284  | -0.9851026 |
| O    | -1.945232  | 13.455372 | 2.767332   | H    | -2.2900706 | 14.839984  | -0.2437196 |
| C    | -2.0164564 | 12.290986 | 3.4432846  | H    | -2.8402312 | 15.431287  | 1.34495    |
| C    | -1.6503489 | 12.341497 | 4.8564187  | H    | -1.0944762 | 15.184995  | 1.0277465  |
| C    | -2.1017798 | 14.807054 | 0.8344916  | H    | 1.5982344  | 6.4276067  | 1.622312   |
| O    | 1.7060862  | 3.6165343 | -0.1681376 | H    | 1.1925786  | 4.7613182  | 2.1058805  |
| C    | 1.4149876  | 3.0816534 | -1.3695372 | H    | 2.8539784  | 5.1690535  | 1.5733034  |
| C    | 1.8289296  | 1.6947544 | -1.5728079 | H    | -1.7427223 | 12.245641  | -5.7993045 |
| C    | 1.7901875  | 5.3687101 | 1.420654   | H    | -2.8374445 | 5.8198067  | -4.0241196 |
| O    | -0.910868  | 4.489772  | 0.2706126  | H    | 1.1777967  | -0.8065393 | -3.843     |
| O    | 3.4995296  | 5.4389331 | -1.1330445 | H    | 3.6890053  | -0.8933034 | -0.3496403 |
| O    | -4.5620611 | 13.260687 | 1.8150335  | H    | -0.2896713 | 14.227418  | 7.3681524  |
| O    | 0.058315   | 12.634289 | 1.0867027  | H    | -1.9001584 | 10.242179  | 7.5593544  |

|                                                               |            |            |            |   |            |              |            |
|---------------------------------------------------------------|------------|------------|------------|---|------------|--------------|------------|
| C                                                             | -2.739788  | 10.79006   | -5.1467129 | H | 4.1498112  | 0.9113785    | 0.8841549  |
| C                                                             | -3.8767087 | 7.3695801  | -3.7493907 | H | 3.8923514  | 2.5422401    | 0.223977   |
| O                                                             | -3.713972  | 11.08708   | -5.801696  | H | 2.6862521  | 1.8304405    | 1.2836459  |
| O                                                             | -1.5926409 | 11.505887  | -5.1801699 | H | 0.4316864  | 2.5812237    | -3.3434749 |
| O                                                             | -2.8004213 | 6.7566368  | -4.2970342 | H | 3.3132799  | -2.6510894   | -1.7098651 |
| O                                                             | -4.6856851 | 6.7873363  | -3.0648987 | H | -0.0570351 | 15.36918     | 5.447503   |
| O                                                             | 0.8055089  | 3.7593006  | -2.2118737 | H | -0.0068291 | 14.497132    | 3.8989995  |
| O                                                             | -2.4003125 | 11.26725   | 2.8562326  | H | -1.4940908 | 15.278916    | 4.4110285  |
| C                                                             | 1.3022889  | 1.0244322  | -2.7245789 | H | -1.0478217 | 11.445689    | 9.3434104  |
| C                                                             | 1.597575   | -0.3173739 | -2.9722085 | H | -2.5687261 | 10.208767    | 4.1396772  |
| <b>NImag</b>                                                  |            |            |            |   |            | 0            |            |
| <b><math>\Sigma</math> Electronic and thermal Free Energy</b> |            |            |            |   |            | -1865701.128 |            |
| <b>mol Fraction</b>                                           |            |            |            |   |            | 0.082837975  |            |

**(8S, 13S, 8aS, 12aS, 13aS)-Diazaphilonic acid (2) - Conformer 15**

| Atom | X          | Y         | Z          | Atom | X          | Y          | Z          |
|------|------------|-----------|------------|------|------------|------------|------------|
| C    | 2.0049012  | 7.1808548 | -1.6376474 | C    | 2.6608703  | -0.8842763 | -2.0439645 |
| C    | 0.6786286  | 7.4962883 | -1.5774645 | C    | 3.2133021  | -0.2252703 | -0.9338996 |
| C    | -0.29092   | 6.6524443 | -0.8907081 | C    | 2.9249229  | 1.1059153  | -0.671838  |
| C    | 0.1243877  | 5.3932619 | -0.2172433 | C    | -2.1206134 | 11.2671    | 5.9302597  |
| C    | 1.6409112  | 5.1684753 | -0.0674827 | C    | -1.5445495 | 11.294622  | 7.1928655  |
| C    | 2.5451186  | 5.9700192 | -1.0469891 | C    | -0.3391683 | 11.979435  | 7.4083469  |
| C    | 0.0996356  | 8.667146  | -2.2083636 | C    | 0.3056264  | 12.630351  | 6.3636437  |
| C    | -1.2226891 | 8.9256879 | -2.1517302 | C    | -0.258274  | 12.624414  | 5.0819503  |
| O    | -2.0890327 | 8.1053412 | -1.4683279 | C    | 3.5948055  | 1.737398   | 0.5284253  |
| C    | -1.5974223 | 6.995989  | -0.8708518 | O    | 0.7371269  | 1.7308224  | -3.6037942 |
| C    | -1.9309384 | 10.073543 | -2.8395109 | O    | 2.9953342  | -2.1918522 | -2.2101832 |
| C    | -3.0368862 | 10.671717 | -1.9815288 | C    | -3.4189346 | 10.517504  | 5.733848   |
| C    | -4.3345125 | 10.494145 | -2.3281199 | O    | 0.1645384  | 11.959049  | 8.6746265  |
| C    | -4.8651633 | 9.7693447 | -3.5275938 | O    | 0.4739045  | 13.235342  | 4.1285361  |
| C    | -3.795821  | 8.9588569 | -4.2685757 | H    | 2.7044338  | 7.8031466  | -2.1877026 |
| C    | -2.4282922 | 9.6853436 | -4.2606757 | H    | 0.7440389  | 9.3511975  | -2.7519243 |
| C    | -2.696041  | 11.449664 | -0.7915082 | H    | -2.3671808 | 6.414665   | -0.3789385 |
| C    | -3.8372837 | 11.971593 | -0.0555525 | H    | -1.1782009 | 10.852869  | -2.9958286 |
| C    | -5.0932354 | 11.731406 | -0.4896862 | H    | -5.3118207 | 10.509618  | -4.2050538 |
| O    | -5.3711657 | 11.022708 | -1.6006702 | H    | -5.6743708 | 9.1055392  | -3.2077604 |
| C    | -1.4120023 | 11.669448 | -0.36336   | H    | -4.1002714 | 8.8595827  | -5.3168148 |
| C    | -1.1214734 | 12.380874 | 0.8578345  | H    | -1.6877403 | 9.0184165  | -4.7171587 |
| C    | -2.2373054 | 13.218039 | 1.5214964  | H    | -5.9812591 | 12.086469  | 0.0178806  |
| C    | -3.6719643 | 12.77917  | 1.1859285  | H    | -0.5572822 | 11.232221  | -0.8639485 |
| O    | -2.0048209 | 13.212991 | 2.9313865  | H    | -2.2224452 | 14.782647  | -0.0016303 |
| C    | -2.1187809 | 11.980029 | 3.5274827  | H    | -2.8279916 | 15.290738  | 1.5972665  |
| C    | -1.4965708 | 11.964727 | 4.8605353  | H    | -1.0777205 | 15.033518  | 1.3387322  |
| C    | -2.0805415 | 14.683901 | 1.0794598  | H    | 1.8370151  | 6.6100422  | 1.5545161  |
| O    | 1.9406908  | 3.7678587 | -0.1860331 | H    | 1.4573075  | 4.9488906  | 2.0755419  |
| C    | 1.6369314  | 3.2072211 | -1.37184   | H    | 3.104102   | 5.3627395  | 1.5051637  |
| C    | 2.0487497  | 1.8166896 | -1.5512612 | H    | -3.0204453 | 11.546847  | -6.8283578 |
| C    | 2.0358287  | 5.5496195 | 1.3684076  | H    | -2.7114613 | 5.9421812  | -3.9390294 |
| O    | -0.67763   | 4.6161992 | 0.2678746  | H    | 1.4051913  | -0.6910375 | -3.8034601 |
| O    | 3.6951476  | 5.589254  | -1.2241549 | H    | 3.8815113  | -0.7823404 | -0.28615   |
| O    | -4.6215886 | 13.174729 | 1.8361181  | H    | -2.0157737 | 10.79192   | 8.0307509  |
| O    | -0.0025787 | 12.393367 | 1.3777243  | H    | 1.2596355  | 13.131508  | 6.5034357  |

|                                                               |            |            |            |   |            |             |            |
|---------------------------------------------------------------|------------|------------|------------|---|------------|-------------|------------|
| C                                                             | -2.4424918 | 10.934902  | -5.1473368 | H | 4.3245509  | 1.0417408   | 0.9523648  |
| C                                                             | -3.7366749 | 7.5163943  | -3.7639763 | H | 4.1079998  | 2.6648817   | 0.2589598  |
| O                                                             | -1.8949072 | 11.982804  | -4.8909391 | H | 2.8693802  | 1.9924595   | 1.3071369  |
| O                                                             | -3.1073765 | 10.725565  | -6.3075056 | H | 0.6614675  | 2.6833141   | -3.3399438 |
| O                                                             | -2.6576096 | 6.8643492  | -4.2555477 | H | 2.5603712  | -2.5316836  | -3.00837   |
| O                                                             | -4.5746335 | 6.982142   | -3.0758905 | H | -3.8037084 | 10.167359   | 6.6959156  |
| O                                                             | 1.0181734  | 3.8675913  | -2.2222564 | H | -4.1850353 | 11.144028   | 5.2644348  |
| O                                                             | -2.6755572 | 11.058882  | 2.956045   | H | -3.2801247 | 9.653715    | 5.0765995  |
| C                                                             | 1.5304782  | 1.1367528  | -2.6976316 | H | 0.9917228  | 12.465861   | 8.6921773  |
| C                                                             | 1.8279148  | -0.2100278 | -2.925859  | H | 0.1276646  | 13.069243   | 3.2246714  |
| <b>NImag</b>                                                  |            |            |            |   |            | 0           |            |
| <b><math>\Sigma</math> Electronic and thermal Free Energy</b> |            |            |            |   |            | -1865698.44 |            |
| <b>mol Fraction</b>                                           |            |            |            |   |            | 0.000882147 |            |

**(8S, 13S, 8aS, 12aS, 13aS)-Diazaphilonic acid (2) - Conformer 16**

| Atom | X          | Y         | Z          | Atom | X          | Y          | Z          |
|------|------------|-----------|------------|------|------------|------------|------------|
| C    | 1.8495525  | 7.0660144 | -1.4876019 | C    | 2.4433424  | -0.9750426 | -2.0763758 |
| C    | 0.524619   | 7.3930219 | -1.4645782 | C    | 2.99789    | -0.3339788 | -0.9554728 |
| C    | -0.4740175 | 6.5493404 | -0.820962  | C    | 2.7102386  | 0.993497   | -0.6653384 |
| C    | -0.0922932 | 5.2774431 | -0.1520804 | C    | -1.0634064 | 13.440235  | 5.5975214  |
| C    | 1.4171163  | 5.0294207 | 0.0334053  | C    | -0.8056903 | 13.364178  | 6.9579835  |
| C    | 2.3593263  | 5.8409783 | -0.900832  | C    | -1.1364958 | 12.217157  | 7.6979253  |
| C    | -0.0227617 | 8.5769165 | -2.0989552 | C    | -1.7112634 | 11.116432  | 7.0788671  |
| C    | -1.3433869 | 8.8487155 | -2.0785423 | C    | -1.9705323 | 11.156156  | 5.7053479  |
| O    | -2.2381657 | 8.0293296 | -1.4320886 | C    | 3.3842135  | 1.6033021  | 0.5439536  |
| C    | -1.7774567 | 6.9050888 | -0.8384714 | O    | 0.5253112  | 1.6705196  | -3.5846765 |
| C    | -2.0202764 | 10.012691 | -2.7705458 | O    | 2.7113213  | -2.2777897 | -2.360973  |
| C    | -3.0952063 | 10.652856 | -1.9061138 | C    | -0.6424001 | 14.705064  | 4.8824661  |
| C    | -4.4015959 | 10.444436 | -2.1968571 | O    | -0.8532272 | 12.242647  | 9.0275181  |
| C    | -4.972346  | 9.6558829 | -3.3343245 | O    | -2.507983  | 10.047692  | 5.1732852  |
| C    | -3.9210787 | 8.8877181 | -4.1488614 | H    | 2.5712489  | 7.6895972  | -2.0066497 |
| C    | -2.5629441 | 9.6195175 | -4.1822041 | H    | 0.6443412  | 9.2585631  | -2.6173225 |
| C    | -2.7146477 | 11.484352 | -0.7635473 | H    | -2.5688791 | 6.3224681  | -0.3839561 |
| C    | -3.8355363 | 12.036109 | -0.0154581 | H    | -1.233415  | 10.752928  | -2.940763  |
| C    | -5.1038746 | 11.764421 | -0.3909908 | H    | -5.5070063 | 10.353933  | -3.9889569 |
| O    | -5.4167563 | 10.999893 | -1.4550738 | H    | -5.7123289 | 8.9526541  | -2.9384363 |
| C    | -1.4231812 | 11.732701 | -0.3890647 | H    | -4.2732975 | 8.8444079  | -5.1872158 |
| C    | -1.0759056 | 12.537155 | 0.7690916  | H    | -1.81421   | 8.9733966  | -4.6528575 |
| C    | -2.1930377 | 13.37764  | 1.4423034  | H    | -5.9765337 | 12.135593  | 0.1316626  |
| C    | -3.6306395 | 12.892615 | 1.18281    | H    | -0.5805157 | 11.282084  | -0.8993286 |
| O    | -1.9474416 | 13.457127 | 2.8550895  | H    | -2.2584904 | 14.863726  | -0.1494416 |
| C    | -2.0288775 | 12.288262 | 3.5221232  | H    | -2.822373  | 15.445691  | 1.4378561  |
| C    | -1.6764641 | 12.327759 | 4.9390718  | H    | -1.0743627 | 15.19614   | 1.1360297  |
| C    | -2.0808737 | 14.8227   | 0.9303047  | H    | 2.838279   | 5.1650079  | 1.6501879  |
| O    | 1.7028719  | 3.6279892 | -0.1130859 | H    | 1.5858506  | 6.4269823  | 1.6956223  |
| C    | 1.4221423  | 3.1022852 | -1.3209926 | H    | 1.1705523  | 4.7586319  | 2.1636512  |
| C    | 1.8338474  | 1.7155404 | -1.5297205 | H    | -1.6640536 | 12.306361  | -5.7177145 |
| C    | 1.776631   | 5.3689262 | 1.4885142  | H    | -2.7962888 | 5.8719783  | -3.9976412 |
| O    | -0.9156443 | 4.5061665 | 0.3058654  | H    | 1.1975479  | -0.7680239 | -3.8234826 |
| O    | 3.5111959  | 5.4514978 | -1.0477184 | H    | 3.6739383  | -0.8866491 | -0.3063001 |
| O    | -4.5553703 | 13.277096 | 1.87587    | H    | -0.3343075 | 14.191686  | 7.4770502  |
| O    | 0.0700256  | 12.641578 | 1.1884802  | H    | -1.9593116 | 10.210499  | 7.6247115  |

|                                                               |            |            |            |   |            |              |            |
|---------------------------------------------------------------|------------|------------|------------|---|------------|--------------|------------|
| C                                                             | -2.6719885 | 10.849463  | -5.0850813 | H | 4.1279161  | 0.9079251    | 0.9445431  |
| C                                                             | -3.8333008 | 7.4231823  | -3.7224815 | H | 3.8820976  | 2.544107     | 0.2931512  |
| O                                                             | -3.6386712 | 11.153951  | -5.7477116 | H | 2.6633384  | 1.8288659    | 1.3358924  |
| O                                                             | -1.5224102 | 11.561953  | -5.1021841 | H | 0.4567563  | 2.6185128    | -3.3077949 |
| O                                                             | -2.7536706 | 6.8105051  | -4.2638225 | H | 3.3063427  | -2.6338264   | -1.682321  |
| O                                                             | -4.6507306 | 6.8389112  | -3.0498635 | H | -0.0792845 | 15.346021    | 5.5667654  |
| O                                                             | 0.8231114  | 3.7875789  | -2.1646407 | H | -0.0168584 | 14.484624    | 4.01275    |
| O                                                             | -2.4101689 | 11.269889  | 2.9241806  | H | -1.5065022 | 15.267694    | 4.5158241  |
| C                                                             | 1.3165492  | 1.0548079  | -2.6912369 | H | -1.1205553 | 11.398758    | 9.4253362  |
| C                                                             | 1.6102053  | -0.2861647 | -2.945246  | H | -2.594378  | 10.202966    | 4.1985043  |
| <b>NImag</b>                                                  |            |            |            |   |            | 0            |            |
| <b><math>\Sigma</math> Electronic and thermal Free Energy</b> |            |            |            |   |            | -1865701.128 |            |
| <b>mol Fraction</b>                                           |            |            |            |   |            | 0.082837975  |            |



**(8S, 13S, 8aS, 12aS, 13aS)-Diazaphilonic acid (2) - Conformer 17**

| Atom | X          | Y         | Z          | Atom | X          | Y          | Z          |
|------|------------|-----------|------------|------|------------|------------|------------|
| C    | 1.8083409  | 6.8016919 | -1.8350993 | C    | 2.8269875  | -0.9701471 | -2.2492597 |
| C    | 0.5130779  | 7.2103396 | -1.6638809 | C    | 1.4769425  | -0.72051   | -2.543187  |
| C    | -0.4474804 | 6.4475568 | -0.8796641 | C    | 0.9305695  | 0.5413027  | -2.3398617 |
| C    | -0.0609888 | 5.1801052 | -0.1991453 | C    | -0.3993719 | 13.553842  | 5.3493604  |
| C    | 1.4395099  | 4.8368607 | -0.2127604 | C    | -0.051563  | 13.507337  | 6.690843   |
| C    | 2.2820647  | 5.5497733 | -1.2990491 | C    | -0.3644174 | 12.392057  | 7.485323   |
| C    | -0.0358663 | 8.4006811 | -2.2796672 | C    | -1.01275   | 11.293353  | 6.9396863  |
| C    | -1.332925  | 8.7432589 | -2.1318177 | C    | -1.3643383 | 11.303247  | 5.5863675  |
| O    | -2.1885517 | 8.0002419 | -1.3584016 | C    | -0.5273482 | 0.7690391  | -2.670263  |
| C    | -1.7241044 | 6.8768273 | -0.7679487 | O    | 4.0068998  | 2.2407018  | -1.1243384 |
| C    | -2.0252749 | 9.905573  | -2.8120827 | O    | 3.3889411  | -2.1973919 | -2.4404917 |
| C    | -3.0193245 | 10.603099 | -1.8979481 | C    | 0.0086882  | 14.784643  | 4.5703138  |
| C    | -4.3477295 | 10.417921 | -2.0867577 | O    | 0.0102221  | 12.445526  | 8.7910364  |
| C    | -5.0163233 | 9.5996351 | -3.147714  | O    | -1.9700679 | 10.198192  | 5.125389   |
| C    | -4.0421684 | 8.7770047 | -4.0044597 | H    | 2.4921614  | 7.3576829  | -2.4690044 |
| C    | -2.6778807 | 9.4790852 | -4.1662758 | H    | 0.603423   | 9.0239785  | -2.8969761 |
| C    | -2.5371072 | 11.461485 | -0.8157307 | H    | -2.4881885 | 6.3578157  | -0.2031191 |
| C    | -3.5873539 | 12.070649 | -0.0120321 | H    | -1.2336747 | 10.616969  | -3.0640714 |
| C    | -4.885612  | 11.821054 | -0.2871555 | H    | -5.5837046 | 10.283524  | -3.7895152 |
| O    | -5.2928831 | 11.026784 | -1.2966621 | H    | -5.7388918 | 8.9289723  | -2.6712781 |
| C    | -1.2162246 | 11.682874 | -0.5407413 | H    | -4.4710418 | 8.6984252  | -5.0114216 |
| C    | -0.7662527 | 12.513322 | 0.5627485  | H    | -1.9790021 | 8.8020644  | -4.6689882 |
| C    | -1.8092016 | 13.408783 | 1.2824716  | H    | -5.7092994 | 12.234772  | 0.2810132  |
| C    | -3.2753445 | 12.962362 | 1.136648   | H    | -0.4240214 | 11.191357  | -1.0927964 |
| O    | -1.4654206 | 13.521401 | 2.6723447  | H    | -1.9382    | 14.848961  | -0.3471514 |
| C    | -1.5374327 | 12.375332 | 3.3792352  | H    | -2.3751757 | 15.494713  | 1.255377   |
| C    | -1.0885975 | 12.443212 | 4.7671728  | H    | -0.6599759 | 15.180713  | 0.8450145  |
| C    | -1.688858  | 14.833813 | 0.7190253  | H    | 1.9197567  | 6.2681095  | 1.3640718  |
| O    | 1.6447812  | 3.4293949 | -0.3648501 | H    | 1.4684519  | 4.640289   | 1.9347747  |
| C    | 1.1664649  | 2.8987615 | -1.5356411 | H    | 3.0736814  | 4.9222697  | 1.1993324  |
| C    | 1.7436684  | 1.5718765 | -1.8030301 | H    | -1.8476099 | 12.098319  | -5.8501121 |
| C    | 2.0155976  | 5.195293  | 1.1682281  | H    | -2.9407333 | 5.7538165  | -3.7912587 |
| O    | -0.8585227 | 4.5038502 | 0.4228714  | H    | 4.6970264  | -0.1441577 | -1.5715943 |
| O    | 3.3510116  | 5.0312952 | -1.630672  | H    | 0.8509724  | -1.522493  | -2.9295277 |
| O    | -4.1389513 | 13.401053 | 1.8747811  | H    | 0.4785104  | 14.333582  | 7.1520715  |
| O    | 0.4087021  | 12.595236 | 0.8980412  | H    | -1.2494249 | 10.411125  | 7.5277432  |

|                                                               |            |           |            |   |            |              |            |
|---------------------------------------------------------------|------------|-----------|------------|---|------------|--------------|------------|
| C                                                             | -2.8313951 | 10.680759 | -5.1001415 | H | -1.0724828 | 1.2109684    | -1.8294963 |
| C                                                             | -3.946039  | 7.3297874 | -3.5223291 | H | -0.6370321 | 1.4619779    | -3.5100876 |
| O                                                             | -3.8374302 | 10.979092 | -5.7041874 | H | -1.0106819 | -0.1768598   | -2.9325181 |
| O                                                             | -1.6752251 | 11.372028 | -5.2208803 | H | 3.6390671  | 3.1511796    | -1.1336244 |
| O                                                             | -2.9106706 | 6.6787364 | -4.1035006 | H | 2.7147108  | -2.7997633   | -2.7917778 |
| O                                                             | -4.7245747 | 6.7886339 | -2.7720101 | H | 0.6347311  | 15.426915    | 5.1961809  |
| O                                                             | 0.3636321  | 3.5105817 | -2.2206954 | H | 0.5678731  | 14.520964    | 3.6680335  |
| O                                                             | -1.9898669 | 11.35363  | 2.8389306  | H | -0.8615689 | 15.363069    | 4.2451415  |
| C                                                             | 3.1204805  | 1.316717  | -1.5431231 | H | -0.2524695 | 11.621349    | 9.2310787  |
| C                                                             | 3.6464478  | 0.0397317 | -1.7630993 | H | -2.1184909 | 10.32868     | 4.1545903  |
| <b>NImag</b>                                                  |            |           |            |   |            | 0            |            |
| <b><math>\Sigma</math> Electronic and thermal Free Energy</b> |            |           |            |   |            | -1865698.712 |            |
| <b>mol Fraction</b>                                           |            |           |            |   |            | 0.001397618  |            |

**(8S, 13S, 8aS, 12aS, 13aS)-Diazaphilonic acid (2) - Conformer 18**

| Atom | X          | Y         | Z          | Atom | X          | Y          | Z          |
|------|------------|-----------|------------|------|------------|------------|------------|
| C    | 1.9052839  | 7.0791592 | -1.5933746 | C    | 2.5892016  | -0.9457642 | -2.3055395 |
| C    | 0.5766001  | 7.3888231 | -1.5641132 | C    | 3.1300966  | -0.3202114 | -1.169254  |
| C    | -0.4104925 | 6.5231621 | -0.931745  | C    | 2.8293158  | 0.9993953  | -0.8576642 |
| C    | -0.0115949 | 5.2460656 | -0.2825999 | C    | -1.9090373 | 11.427369  | 5.9028024  |
| C    | 1.5009607  | 5.0145957 | -0.101747  | C    | -1.2900655 | 11.498995  | 7.1431148  |
| C    | 2.4315699  | 5.8521067 | -1.0245172 | C    | -0.0935232 | 12.21479   | 7.2991438  |
| C    | 0.013339   | 8.5752913 | -2.1801234 | C    | 0.4997596  | 12.853048  | 6.2167482  |
| C    | -1.3105157 | 8.8297413 | -2.1533341 | C    | -0.1081357 | 12.802784  | 4.9563849  |
| O    | -2.1941082 | 7.9899478 | -1.5181247 | C    | 3.4886641  | 1.5922413  | 0.3679586  |
| C    | -1.7182136 | 6.8624603 | -0.9417236 | O    | 0.6582493  | 1.7094748  | -3.7796945 |
| C    | -2.0036274 | 9.9961712 | -2.8253292 | O    | 2.8703105  | -2.2407737 | -2.6113567 |
| C    | -3.0874829 | 10.604775 | -1.9485763 | C    | -3.1964784 | 10.645585  | 5.7709606  |
| C    | -4.3920777 | 10.378181 | -2.2407464 | O    | 0.4542189  | 12.236909  | 8.5468371  |
| C    | -4.9504568 | 9.6001434 | -3.391297  | O    | 0.576716   | 13.405273  | 3.9631152  |
| C    | -3.887684  | 8.865039  | -4.2212393 | H    | 2.6186418  | 7.7193586  | -2.1036738 |
| C    | -2.5422706 | 9.6201685 | -4.2432151 | H    | 0.6710178  | 9.2726763  | -2.6896274 |
| C    | -2.7217629 | 11.42065  | -0.7930418 | H    | -2.5015676 | 6.2636042  | -0.494502  |
| C    | -3.8477966 | 11.938528 | -0.0315479 | H    | -1.2277832 | 10.750505  | -2.9836976 |
| C    | -5.1121815 | 11.652171 | -0.4106749 | H    | -5.4981604 | 10.300957  | -4.0320011 |
| O    | -5.4122492 | 10.901968 | -1.4876857 | H    | -5.6773986 | 8.8773442  | -3.0066344 |
| C    | -1.428119  | 11.678072 | -0.4156094 | H    | -4.2412712 | 8.8349695  | -5.2595601 |
| C    | -1.1107401 | 12.431233 | 0.7729256  | H    | -1.7833975 | 8.9954956  | -4.7262544 |
| C    | -2.221352  | 13.262084 | 1.4536648  | H    | -5.9900272 | 11.999371  | 0.1196314  |
| C    | -3.6572362 | 12.784771 | 1.1801365  | H    | -0.5819464 | 11.237592  | -0.9282536 |
| O    | -1.9398877 | 13.298715 | 2.8540697  | H    | -2.2956532 | 14.788029  | -0.1065043 |
| C    | -2.0067554 | 12.079393 | 3.4849457  | H    | -2.8539913 | 15.323115  | 1.5002737  |
| C    | -1.3383373 | 12.111203 | 4.7949229  | H    | -1.1088452 | 15.096372  | 1.1847513  |
| C    | -2.1123889 | 14.719262 | 0.9707615  | H    | 1.6540735  | 6.3889752  | 1.5813909  |
| O    | 1.8038488  | 3.6192829 | -0.2697699 | H    | 1.2599564  | 4.7087564  | 2.0244034  |
| C    | 1.5286939  | 3.1090675 | -1.4857095 | H    | 2.921918   | 5.1433765  | 1.5157063  |
| C    | 1.9532149  | 1.7297303 | -1.715606  | H    | -1.6886532 | 12.347266  | -5.7331122 |
| C    | 1.8576882  | 5.3366337 | 1.358026   | H    | -2.7124673 | 5.8660545  | -4.125633  |
| O    | -0.8247952 | 4.4573902 | 0.1634671  | H    | 1.3535763  | -0.7181542 | -4.0572839 |
| O    | 3.5882799  | 5.4806418 | -1.1780694 | H    | 3.8056573  | -0.8789312 | -0.524797  |
| O    | -4.5920954 | 13.179823 | 1.8515444  | H    | -1.7205086 | 11.007615  | 8.0091764  |
| O    | 0.0257611  | 12.484774 | 1.2506496  | H    | 1.4466077  | 13.377936  | 6.3104818  |

|                                                               |            |            |            |   |            |              |            |
|---------------------------------------------------------------|------------|------------|------------|---|------------|--------------|------------|
| C                                                             | -2.6736569 | 10.865086  | -5.1224681 | H | 4.2316998  | 0.8938018    | 0.7643551  |
| C                                                             | -3.7751866 | 7.3945013  | -3.821447  | H | 3.9847555  | 2.539174     | 0.137454   |
| O                                                             | -3.6489153 | 11.168706  | -5.7726971 | H | 2.7591707  | 1.8016456    | 1.1563907  |
| O                                                             | -1.534059  | 11.593334  | -5.1323972 | H | 0.5779738  | 2.6513443    | -3.4855826 |
| O                                                             | -2.6862665 | 6.809993   | -4.3743983 | H | 3.4635283  | -2.6040458   | -1.9349517 |
| O                                                             | -4.5825557 | 6.7856079  | -3.1586895 | H | -3.5393982 | 10.311515    | 6.7543166  |
| O                                                             | 0.9240319  | 3.8021602  | -2.3191317 | H | -3.9923151 | 11.243723    | 5.3141676  |
| O                                                             | -2.5635346 | 11.132937  | 2.956488   | H | -3.0617548 | 9.7687821    | 5.130308   |
| C                                                             | 1.4490897  | 1.0850527  | -2.8919925 | H | 1.2697661  | 12.762013    | 8.5231689  |
| C                                                             | 1.7562124  | -0.2485348 | -3.1678434 | H | 0.2031944  | 13.209068    | 3.0764135  |
| <b>NImag</b>                                                  |            |            |            |   |            | 0            |            |
| <b><math>\Sigma</math> Electronic and thermal Free Energy</b> |            |            |            |   |            | -1865698.369 |            |
| <b>mol Fraction</b>                                           |            |            |            |   |            | 0.000782541  |            |

**(8S, 13S, 8aS, 12aS, 13aS)-Diazaphilonic acid (2) - Conformer 19**

| Atom | X          | Y         | Z          | Atom | X          | Y          | Z          |
|------|------------|-----------|------------|------|------------|------------|------------|
| C    | 1.7493678  | 6.7390297 | -1.5040756 | C    | 2.5857109  | -1.0128852 | -2.2531296 |
| C    | 0.453047   | 7.1766024 | -1.4591795 | C    | 1.2815452  | -0.7051773 | -2.6694153 |
| C    | -0.6062588 | 6.4110964 | -0.8180425 | C    | 0.7525875  | 0.557994   | -2.4444989 |
| C    | -0.3277651 | 5.1077864 | -0.1524357 | C    | -2.1178542 | 11.485249  | 5.9260959  |
| C    | 1.1555414  | 4.715074  | -0.0261035 | C    | -1.5578023 | 11.52644   | 7.1953563  |
| C    | 2.1299608  | 5.4518334 | -0.9775904 | C    | -0.3268633 | 12.165297  | 7.4080262  |
| C    | 0.0039775  | 8.4045102 | -2.0823532 | C    | 0.3592254  | 12.756232  | 6.3539333  |
| C    | -1.2937031 | 8.7750178 | -2.0664176 | C    | -0.1874144 | 12.735647  | 5.0651124  |
| O    | -2.2469112 | 8.0277314 | -1.4228401 | C    | -0.6561157 | 0.8527813  | -2.9083228 |
| C    | -1.8770382 | 6.8705887 | -0.8297817 | O    | 3.7268409  | 2.0851242  | -0.8090014 |
| C    | -1.8804388 | 9.9777075 | -2.7756764 | O    | 3.0345321  | -2.273362  | -2.5114773 |
| C    | -2.963692  | 10.66077  | -1.9562908 | C    | -3.44461   | 10.786186  | 5.7336685  |
| C    | -4.2650812 | 10.506904 | -2.3047703 | O    | 0.1583466  | 12.161497  | 8.6813025  |
| C    | -4.8162157 | 9.7415377 | -3.4676333 | O    | 0.5834504  | 13.285482  | 4.1047276  |
| C    | -3.7605162 | 8.9338064 | -4.2375448 | H    | 2.5122838  | 7.3006367  | -2.0343248 |
| C    | -2.3771745 | 9.6163269 | -4.2125199 | H    | 0.7220956  | 9.0324299  | -2.6004075 |
| C    | -2.6011863 | 11.46714  | -0.7935972 | H    | -2.7109922 | 6.3521556  | -0.3738526 |
| C    | -3.7264945 | 12.06423  | -0.091604  | H    | -1.0529679 | 10.680945  | -2.9058018 |
| C    | -4.9874654 | 11.849845 | -0.5256418 | H    | -5.2948536 | 10.460098  | -4.1429257 |
| O    | -5.2840599 | 11.102198 | -1.6058658 | H    | -5.5987652 | 9.0670922  | -3.1048175 |
| C    | -1.3127611 | 11.646175 | -0.3579601 | H    | -4.0706434 | 8.9010649  | -5.2895535 |
| C    | -1.0037678 | 12.391464 | 0.8380236  | H    | -1.6340555 | 8.9462181  | -4.657566  |
| C    | -2.0893216 | 13.299753 | 1.4576945  | H    | -5.8656002 | 12.257824  | -0.0410837 |
| C    | -3.5388761 | 12.914224 | 1.118086   | H    | -0.4731728 | 11.147326  | -0.8265294 |
| O    | -1.8742866 | 13.330945 | 2.8699833  | H    | -1.9875058 | 14.812236  | -0.1138921 |
| C    | -2.0533765 | 12.12435  | 3.5038897  | H    | -2.5867683 | 15.397898  | 1.4601059  |
| C    | -1.4500962 | 12.123067 | 4.8451299  | H    | -0.847002  | 15.054792  | 1.2319825  |
| C    | -1.8615672 | 14.741929 | 0.9714904  | H    | 1.5055723  | 6.0452002  | 1.668612   |
| O    | 1.3347112  | 3.3107655 | -0.2342022 | H    | 0.94816    | 4.4070804  | 2.0978913  |
| C    | 0.9641692  | 2.8600516 | -1.4762129 | H    | 2.6308959  | 4.670476   | 1.5529167  |
| C    | 1.5299301  | 1.5326533 | -1.7610194 | H    | -1.317042  | 12.27982   | -5.6845832 |
| C    | 1.5906331  | 4.9812067 | 1.4251963  | H    | -2.7332887 | 5.8845393  | -4.0153353 |
| O    | -1.2041974 | 4.4353686 | 0.3572377  | H    | 4.3990277  | -0.267224  | -1.3274642 |
| O    | 3.2159503  | 4.9169516 | -1.2153246 | H    | 0.6974625  | -1.4733757 | -3.1649173 |
| O    | -4.4769728 | 13.379791 | 1.7376608  | H    | -2.0611989 | 11.069899  | 8.0408953  |
| O    | 0.1097938  | 12.376954 | 1.3691044  | H    | 1.3320893  | 13.220006  | 6.4926365  |

|                                                               |            |           |            |   |            |              |            |
|---------------------------------------------------------------|------------|-----------|------------|---|------------|--------------|------------|
| C                                                             | -2.4042295 | 10.856372 | -5.107771  | H | -1.1311687 | -0.0596238   | -3.2799711 |
| C                                                             | -3.7420824 | 7.4678728 | -3.8040919 | H | -1.2753347 | 1.2587008    | -2.1011849 |
| O                                                             | -3.3314275 | 11.200349 | -5.8061831 | H | -0.6589848 | 1.5996946    | -3.7081773 |
| O                                                             | -1.2298314 | 11.525959 | -5.0703184 | H | 3.388929   | 3.0075367    | -0.7986235 |
| O                                                             | -2.655188  | 6.8200475 | -4.2851723 | H | 3.939765   | -2.3604566   | -2.1732032 |
| O                                                             | -4.6112294 | 6.9153125 | -3.1708181 | H | -3.8568983 | 10.483136    | 6.7002712  |
| O                                                             | 0.252874   | 3.5358176 | -2.2014677 | H | -4.1766225 | 11.429888    | 5.2341029  |
| O                                                             | -2.6455762 | 11.21263  | 2.952994   | H | -3.3345259 | 9.8969779    | 5.1055138  |
| C                                                             | 2.8618135  | 1.2210907 | -1.3753992 | H | 1.0066512  | 12.632216    | 8.696514   |
| C                                                             | 3.3738544  | -0.059032 | -1.6214996 | H | 0.2417035  | 13.107735    | 3.2017073  |
| <b>NImag</b>                                                  |            |           |            |   |            | 0            |            |
| <b><math>\Sigma</math> Electronic and thermal Free Energy</b> |            |           |            |   |            | -1865696.386 |            |
| <b>mol Fraction</b>                                           |            |           |            |   |            | 2.75E-05     |            |

**(8S, 13S, 8aS, 12aS, 13aS)-Diazaphilonic acid (2) - Conformer 20**

| Atom | X          | Y         | Z          | Atom | X          | Y          | Z          |
|------|------------|-----------|------------|------|------------|------------|------------|
| C    | 1.7789384  | 6.8016969 | -1.6345298 | C    | 2.5603883  | -0.978545  | -2.1302486 |
| C    | 0.4886285  | 7.2490769 | -1.5375697 | C    | 1.2370677  | -0.6829664 | -2.4911251 |
| C    | -0.5392225 | 6.5122348 | -0.8167719 | C    | 0.7221043  | 0.5898624  | -2.2890887 |
| C    | -0.2326897 | 5.2302822 | -0.1227681 | C    | -2.1273103 | 11.406262  | 5.9092596  |
| C    | 1.2537332  | 4.8354402 | -0.0567267 | C    | -1.5691205 | 11.419661  | 7.1800111  |
| C    | 2.1807289  | 5.5317482 | -1.083243  | C    | -0.3243942 | 12.027692  | 7.4023413  |
| C    | 0.0137397  | 8.4594233 | -2.1753523 | C    | 0.3771462  | 12.615114  | 6.3565294  |
| C    | -1.2799352 | 8.8386361 | -2.1059964 | C    | -0.167192  | 12.622177  | 5.0665091  |
| O    | -2.2021567 | 8.117207  | -1.3910076 | C    | -0.7081077 | 0.8712712  | -2.6913472 |
| C    | -1.8064546 | 6.980015  | -0.7772397 | O    | 3.7780205  | 2.1697758  | -0.8689306 |
| C    | -1.8951475 | 10.0223   | -2.822344  | O    | 2.9937573  | -2.2497545 | -2.361565  |
| C    | -2.970663  | 10.708416 | -1.9934058 | C    | -3.469224  | 10.739944  | 5.7059495  |
| C    | -4.272809  | 10.601263 | -2.3516853 | O    | 0.1581439  | 11.997964  | 8.6764647  |
| C    | -4.8337918 | 9.8763116 | -3.5374676 | O    | 0.6178216  | 13.165459  | 4.1140313  |
| C    | -3.8044008 | 8.9922241 | -4.2514481 | H    | 2.5160141  | 7.3403841  | -2.2220134 |
| C    | -2.3987331 | 9.6409201 | -4.2432477 | H    | 0.7081676  | 9.0685537  | -2.7456098 |
| C    | -2.5947799 | 11.489756 | -0.8168437 | H    | -2.6167932 | 6.4841617  | -0.2578527 |
| C    | -3.7088715 | 12.100731 | -0.1086844 | H    | -1.088444  | 10.745057  | -2.9813958 |
| C    | -4.9723737 | 11.929216 | -0.5534317 | H    | -5.2368378 | 10.622302  | -4.2355176 |
| O    | -5.2820463 | 11.211158 | -1.6503411 | H    | -5.6788128 | 9.263831   | -3.2076966 |
| C    | -1.3045905 | 11.634033 | -0.3756342 | H    | -4.1046638 | 8.8888354  | -5.3004913 |
| C    | -0.9833606 | 12.351735 | 0.834352   | H    | -1.6929794 | 8.9259098  | -4.6816465 |
| C    | -2.0500175 | 13.274921 | 1.4641     | H    | -5.8420624 | 12.351811  | -0.06627   |
| C    | -3.506374  | 12.925421 | 1.116085   | H    | -0.4738178 | 11.131435  | -0.8552245 |
| O    | -1.8379147 | 13.282896 | 2.8771884  | H    | -1.9096012 | 14.803628  | -0.0887683 |
| C    | -2.0433986 | 12.072361 | 3.4947252  | H    | -2.5019228 | 15.383273  | 1.4905649  |
| C    | -1.4430314 | 12.041275 | 4.8371957  | H    | -0.7693083 | 15.00513   | 1.2636626  |
| C    | -1.7895347 | 14.717691 | 0.9960697  | H    | 1.6919082  | 6.2271424  | 1.5667523  |
| O    | 1.4186009  | 3.4235716 | -0.2198782 | H    | 1.1533122  | 4.6086854  | 2.0853047  |
| C    | 0.9861212  | 2.9274457 | -1.4238283 | H    | 2.8068613  | 4.8443432  | 1.4465331  |
| C    | 1.5346929  | 1.5877966 | -1.6850322 | H    | -2.8705016 | 11.50196   | -6.8364063 |
| C    | 1.7621833  | 5.1544246 | 1.3597774  | H    | -2.8745529 | 5.9317991  | -3.8371159 |
| O    | -1.0853324 | 4.579091  | 0.45091    | H    | 4.4197246  | -0.2033902 | -1.3284381 |
| O    | 3.2509804  | 4.9821532 | -1.356824  | H    | 0.6273049  | -1.4679494 | -2.9256486 |
| O    | -4.4360882 | 13.399152 | 1.7421895  | H    | -2.0845468 | 10.964744  | 8.0191647  |
| O    | 0.1268977  | 12.301409 | 1.3698683  | H    | 1.3600333  | 13.054964  | 6.5024035  |

|                                                               |            |            |            |   |            |              |            |
|---------------------------------------------------------------|------------|------------|------------|---|------------|--------------|------------|
| C                                                             | -2.3312516 | 10.87592   | -5.147601  | H | -1.2024174 | -0.0529467   | -3.0040775 |
| C                                                             | -3.8287064 | 7.5587591  | -3.7169484 | H | -1.2849289 | 1.3085943    | -1.869298  |
| O                                                             | -1.7120689 | 11.886866  | -4.9063106 | H | -0.7509877 | 1.5881125    | -3.517133  |
| O                                                             | -3.0119856 | 10.696296  | -6.3031792 | H | 3.4427324  | 3.09334      | -0.8782803 |
| O                                                             | -2.7740625 | 6.8438221  | -4.171913  | H | 3.9149508  | -2.3264469   | -2.0666497 |
| O                                                             | -4.7051618 | 7.0838557  | -3.0333361 | H | -3.8904124 | 10.434734    | 6.6680463  |
| O                                                             | 0.2410765  | 3.5773428  | -2.1386296 | H | -4.1852854 | 11.406135    | 5.2127681  |
| O                                                             | -2.6529607 | 11.1799    | 2.9314181  | H | -3.3780028 | 9.8561135    | 5.0672697  |
| C                                                             | 2.8841198  | 1.2871645  | -1.3560809 | H | 1.0169045  | 12.449036    | 8.6983456  |
| C                                                             | 3.3811165  | -0.0034061 | -1.5776305 | H | 0.2740883  | 13.006168    | 3.2081832  |
| <b>NImag</b>                                                  |            |            |            |   |            | 0            |            |
| <b><math>\Sigma</math> Electronic and thermal Free Energy</b> |            |            |            |   |            | -1865696.159 |            |
| <b>mol Fraction</b>                                           |            |            |            |   |            | 1.87E-05     |            |



**(8S, 13S, 8aS, 12aS, 13aS)-Diazaphilonic acid (2) - Conformer 21**

| Atom | X          | Y         | Z          | Atom | X          | Y          | Z          |
|------|------------|-----------|------------|------|------------|------------|------------|
| C    | 2.0749306  | 7.2771958 | -1.9410298 | C    | 3.1798794  | -0.7551254 | -2.3080176 |
| C    | 0.7365079  | 7.5225644 | -1.841092  | C    | 3.7226008  | -0.0542856 | -1.2190838 |
| C    | -0.1673709 | 6.6239185 | -1.13616   | C    | 3.3666738  | 1.261811   | -0.9631561 |
| C    | 0.33149    | 5.3858923 | -0.4811885 | C    | -1.6224683 | 11.101242  | 5.8398982  |
| C    | 1.8613024  | 5.2493803 | -0.3637874 | C    | -0.9563399 | 11.150864  | 7.0565326  |
| C    | 2.6945489  | 6.0953266 | -1.3689293 | C    | 0.2114775  | 11.915969  | 7.19594    |
| C    | 0.080498   | 8.673797  | -2.4312568 | C    | 0.7290133  | 12.626364  | 6.1196378  |
| C    | -1.2494108 | 8.8676568 | -2.3265872 | C    | 0.0720411  | 12.599548  | 4.8834671  |
| O    | -2.0559919 | 7.9910089 | -1.6379128 | C    | 4.0303361  | 1.9439515  | 0.2127054  |
| C    | -1.4877519 | 6.8986807 | -1.0771848 | O    | 1.0737054  | 1.72969    | -3.8435009 |
| C    | -2.0231487 | 10.022359 | -2.9306809 | O    | 3.5825545  | -2.0443705 | -2.4705862 |
| C    | -3.0925925 | 10.543585 | -1.9826514 | C    | -2.8766346 | 10.264539  | 5.7255752  |
| C    | -4.3957299 | 10.261186 | -2.2240504 | O    | 0.8089575  | 11.912253  | 8.4206134  |
| C    | -4.9667344 | 9.5118066 | -3.3875484 | O    | 0.6864158  | 13.274842  | 3.8909954  |
| C    | -3.9074654 | 8.872316  | -4.3037005 | H    | 2.725664   | 7.9381967  | -2.5055928 |
| C    | -2.6035789 | 9.6893875 | -4.3430783 | H    | 0.6736938  | 9.40049    | -2.977687  |
| C    | -2.715056  | 11.329119 | -0.8094064 | H    | -2.2072464 | 6.2697802  | -0.568329  |
| C    | -3.8298574 | 11.759653 | 0.0204509  | H    | -1.2891582 | 10.818001  | -3.0860285 |
| C    | -5.0944699 | 11.422859 | -0.3131224 | H    | -5.5595765 | 10.223999  | -3.9745007 |
| O    | -5.4065124 | 10.698409 | -1.4048234 | H    | -5.6653586 | 8.7575764  | -3.0146558 |
| C    | -1.419904  | 11.63391  | -0.4764712 | H    | -4.320867  | 8.8875698  | -5.3204883 |
| C    | -1.0866808 | 12.352469 | 0.7296454  | H    | -1.8464303 | 9.1046129  | -4.8776755 |
| C    | -2.2038737 | 13.101526 | 1.4900302  | H    | -5.9628513 | 11.704123  | 0.2692673  |
| C    | -3.6267469 | 12.567898 | 1.2559227  | H    | -0.5777029 | 11.255726  | -1.0426521 |
| O    | -1.8647148 | 13.094035 | 2.8780438  | H    | -2.4139829 | 14.684148  | 0.0004765  |
| C    | -1.8512411 | 11.848288 | 3.4587709  | H    | -2.9273894 | 15.126692  | 1.6498603  |
| C    | -1.1307051 | 11.857185 | 4.740923   | H    | -1.1886829 | 14.9958    | 1.2543815  |
| C    | -2.1821796 | 14.5806   | 1.0655446  | H    | 2.0063215  | 6.7171527  | 1.2410825  |
| O    | 2.2409103  | 3.8687113 | -0.4746419 | H    | 1.7377603  | 5.0415288  | 1.7851074  |
| C    | 1.9465275  | 3.2806791 | -1.6509061 | H    | 3.3438611  | 5.5465501  | 1.174628   |
| C    | 2.4305883  | 1.9127222 | -1.8263475 | H    | -1.9277868 | 12.513071  | -5.7387139 |
| C    | 2.2636534  | 5.6685548 | 1.0598745  | H    | -4.3749477 | 5.7896701  | -3.4697886 |
| O    | -0.4150966 | 4.5649716 | 0.0205988  | H    | 1.8712527  | -0.6518208 | -4.0359625 |
| O    | 3.8586204  | 5.7777394 | -1.5758207 | H    | 4.4374699  | -0.5657029 | -0.5835638 |
| O    | -4.5494813 | 12.892472 | 1.9799065  | H    | -1.3269903 | 10.603721  | 7.9167889  |
| O    | 0.0652567  | 12.439876 | 1.162607   | H    | 1.653807   | 13.191469  | 6.1983738  |

|                                                               |            |           |            |   |            |              |            |
|---------------------------------------------------------------|------------|-----------|------------|---|------------|--------------|------------|
| C                                                             | -2.8200011 | 10.96157  | -5.1596335 | H | 4.8105645  | 1.2965024    | 0.623041   |
| C                                                             | -3.6074306 | 7.395339  | -4.0617819 | H | 4.4809838  | 2.8968461    | -0.0790125 |
| O                                                             | -3.8323648 | 11.247973 | -5.7604427 | H | 3.3122258  | 2.1647817    | 1.0085117  |
| O                                                             | -1.7165165 | 11.742811 | -5.1773408 | H | 0.9490076  | 2.6805241    | -3.5924558 |
| O                                                             | -4.6431917 | 6.7279299 | -3.5089968 | H | 3.1480859  | -2.4150415   | -3.2551734 |
| O                                                             | -2.5823585 | 6.8475867 | -4.4024394 | H | -3.1627316 | 9.8746795    | 6.706571   |
| O                                                             | 1.2770528  | 3.8973649 | -2.4934856 | H | -3.7175217 | 10.841817    | 5.3262641  |
| O                                                             | -2.3881272 | 10.89985  | 2.9131941  | H | -2.7277815 | 9.4219307    | 5.0434828  |
| C                                                             | 1.9218443  | 1.1929223 | -2.9523715 | H | 1.5985905  | 12.475116    | 8.3874375  |
| C                                                             | 2.2884776  | -0.138249 | -3.1742827 | H | 0.2853573  | 13.098151    | 3.0123983  |
| <b>NImag</b>                                                  |            |           |            |   |            | 0            |            |
| <b><math>\Sigma</math> Electronic and thermal Free Energy</b> |            |           |            |   |            | -1865697.831 |            |
| <b>mol Fraction</b>                                           |            |           |            |   |            | 0.000315411  |            |

**(8S, 13S, 8aS, 12aS, 13aS)-Diazaphilonic acid (2) - Conformer 22**

| Atom | X          | Y         | Z          | Atom | X          | Y          | Z          |
|------|------------|-----------|------------|------|------------|------------|------------|
| C    | 1.6541327  | 7.4848046 | -1.1780213 | C    | 3.7065545  | -0.0967695 | -0.7469396 |
| C    | 0.3473766  | 7.7492166 | -1.4855656 | C    | 2.5561972  | -0.0329556 | -1.5490063 |
| C    | -0.7400614 | 6.8700024 | -1.0802251 | C    | 1.8255941  | 1.1460413  | -1.6448554 |
| C    | -0.4827544 | 5.6228084 | -0.3064903 | C    | -1.0496102 | 11.955581  | 5.4198386  |
| C    | 0.9361534  | 5.4781911 | 0.2677271  | C    | -0.6068075 | 11.448575  | 6.6318687  |
| C    | 2.0353593  | 6.2957236 | -0.4553818 | C    | -0.3983845 | 10.071391  | 6.8132268  |
| C    | -0.0752306 | 8.906848  | -2.2489996 | C    | -0.6405593 | 9.1771248  | 5.7801159  |
| C    | -1.3763645 | 9.1472656 | -2.5112341 | C    | -1.0963526 | 9.6550683  | 4.5484082  |
| O    | -2.3626763 | 8.2920882 | -2.0839222 | C    | 0.5932452  | 1.1756137  | -2.520603  |
| C    | -2.0151463 | 7.1787219 | -1.402174  | O    | 3.9604814  | 3.253337   | 0.5513937  |
| C    | -1.9440725 | 10.35027  | -3.2347653 | O    | 4.4426611  | -1.2395376 | -0.6358407 |
| C    | -3.0261432 | 10.995634 | -2.3810668 | C    | -1.2409513 | 13.452857  | 5.326369   |
| C    | -4.328906  | 10.824993 | -2.7066668 | O    | 0.0413507  | 9.6746169  | 8.0358631  |
| C    | -4.8840991 | 10.159504 | -3.9277917 | O    | -1.3090763 | 8.7294243  | 3.5979233  |
| C    | -3.8399135 | 9.3808835 | -4.7427481 | H    | 2.4554858  | 8.1253622  | -1.532915  |
| C    | -2.4393155 | 10.028427 | -4.6792191 | H    | 0.6706576  | 9.614004   | -2.5970225 |
| C    | -2.6557674 | 11.708565 | -1.1579694 | H    | -2.870452  | 6.5688981  | -1.1393404 |
| C    | -3.7789733 | 12.058289 | -0.3008149 | H    | -1.1125772 | 11.050476  | -3.3451303 |
| C    | -5.0447414 | 11.848785 | -0.7229547 | H    | -5.3344933 | 10.93581   | -4.5580025 |
| O    | -5.3489504 | 11.303673 | -1.9179931 | H    | -5.6881016 | 9.4818013  | -3.6245017 |
| C    | -1.3725249 | 12.008103 | -0.7998395 | H    | -4.1466397 | 9.4220728  | -5.7955469 |
| C    | -1.02201   | 12.624875 | 0.4660229  | H    | -1.7071233 | 9.3535617  | -5.1357183 |
| C    | -2.1574376 | 13.12905  | 1.3984785  | H    | -5.9224142 | 12.097336  | -0.1394649 |
| C    | -3.573515  | 12.628608 | 1.0559145  | H    | -0.524388  | 11.740615  | -1.4178518 |
| O    | -1.8392788 | 12.776701 | 2.7621494  | H    | -2.4060545 | 15.026135  | 0.3646685  |
| C    | -1.7534093 | 11.454436 | 3.005193   | H    | -2.9180539 | 15.036427  | 2.0709351  |
| C    | -1.3071368 | 11.055508 | 4.3370494  | H    | -1.1748598 | 15.026808  | 1.6484311  |
| C    | -2.1670035 | 14.662801 | 1.36999    | H    | 0.550034   | 6.9496935  | 1.8483886  |
| O    | 1.3558086  | 4.1117977 | 0.2819201  | H    | 0.1818802  | 5.2626091  | 2.2743822  |
| C    | 1.446292   | 3.5209456 | -0.9531392 | H    | 1.8799095  | 5.8126074  | 2.1842746  |
| C    | 2.2368346  | 2.279718  | -0.899705  | H    | -1.3037451 | 12.699732  | -6.0809997 |
| C    | 0.8837237  | 5.9123562 | 1.7448237  | H    | -2.9082555 | 6.2982517  | -4.7513905 |
| O    | -1.3625578 | 4.8252004 | -0.0426958 | H    | 5.0543963  | 0.9779547  | 0.5443106  |
| O    | 3.2037646  | 5.9178331 | -0.3419305 | H    | 2.230428   | -0.9145173 | -2.0977445 |
| O    | -4.4878316 | 12.768528 | 1.8490476  | H    | -0.4102071 | 12.111205  | 7.4676582  |
| O    | 0.138259   | 12.804958 | 0.8147051  | H    | -0.49142   | 8.1072976  | 5.8953422  |

|                                                               |            |           |            |   |            |              |            |
|---------------------------------------------------------------|------------|-----------|------------|---|------------|--------------|------------|
| C                                                             | -2.4300385 | 11.292202 | -5.5422062 | H | 0.3673546  | 0.172496     | -2.894749  |
| C                                                             | -3.8575534 | 7.8902335 | -4.4101303 | H | -0.283718  | 1.545074     | -1.9784699 |
| O                                                             | -3.3478863 | 11.683777 | -6.2280479 | H | 0.7335767  | 1.8444739    | -3.3751943 |
| O                                                             | -1.2362972 | 11.925484 | -5.4901545 | H | 3.517061   | 4.1050358    | 0.3448643  |
| O                                                             | -2.7967388 | 7.2467484 | -4.9538719 | H | 4.0353069  | -1.928458    | -1.1837753 |
| O                                                             | -4.7351502 | 7.3148059 | -3.8093534 | H | -1.0355435 | 13.91282     | 6.296985   |
| O                                                             | 0.915043   | 4.0195502 | -1.9302491 | H | -0.5711311 | 13.896532    | 4.5837442  |
| O                                                             | -2.0389403 | 10.653108 | 2.099268   | H | -2.2601842 | 13.713811    | 5.0269977  |
| C                                                             | 3.4252408  | 2.2140765 | -0.1188185 | H | 0.1500437  | 8.710136     | 8.0386208  |
| C                                                             | 4.1456852  | 1.0176529 | -0.0446869 | H | -1.6577084 | 9.2086126    | 2.8022437  |
| <b>NImag</b>                                                  |            |           |            |   |            | 0            |            |
| <b><math>\Sigma</math> Electronic and thermal Free Energy</b> |            |           |            |   |            | -1865697.131 |            |
| <b>mol Fraction</b>                                           |            |           |            |   |            | 9.66E-05     |            |

**(8S, 13S, 8aS, 12aS, 13aS)-Diazaphilonic acid (2) - Conformer 23**

| Atom | X          | Y         | Z          | Atom | X          | Y          | Z          |
|------|------------|-----------|------------|------|------------|------------|------------|
| C    | 1.9015915  | 6.902173  | -1.8104859 | C    | 2.9695744  | -0.8388917 | -2.3800405 |
| C    | 0.6006909  | 7.2967551 | -1.6480048 | C    | 1.6192133  | -0.5960069 | -2.6738059 |
| C    | -0.3597833 | 6.5170753 | -0.8808141 | C    | 1.0641507  | 0.6544621  | -2.4406894 |
| C    | 0.0320757  | 5.2468606 | -0.2085152 | C    | -1.8130272 | 11.324919  | 5.9377803  |
| C    | 1.5346302  | 4.9122126 | -0.217723  | C    | -1.1943259 | 11.357735  | 7.1798448  |
| C    | 2.3809502  | 5.6480844 | -1.2855027 | C    | 0.0341832  | 12.015226  | 7.3439248  |
| C    | 0.0464923  | 8.488537  | -2.2560697 | C    | 0.6594078  | 12.633289  | 6.2677995  |
| C    | -1.2564262 | 8.8148617 | -2.121411  | C    | 0.0527586  | 12.621549  | 5.0059152  |
| O    | -2.1124028 | 8.0548385 | -1.3652484 | C    | -0.3943779 | 0.8789629  | -2.7705538 |
| C    | -1.6413433 | 6.9330667 | -0.7768238 | O    | 4.1206678  | 2.352649   | -1.1657481 |
| C    | -1.9534582 | 9.9744444 | -2.8013093 | O    | 3.4417003  | -2.0909532 | -2.6383606 |
| C    | -3.013832  | 10.614131 | -1.9175403 | C    | -3.1352381 | 10.605182  | 5.797152   |
| C    | -4.3266096 | 10.455385 | -2.2122512 | O    | 0.5793166  | 12.001872  | 8.5928451  |
| C    | -4.9153653 | 9.7116933 | -3.3726987 | O    | 0.7675206  | 13.198736  | 4.0187385  |
| C    | -3.8874781 | 8.8715932 | -4.1399413 | H    | 2.5864433  | 7.4717331  | -2.4311157 |
| C    | -2.5103254 | 9.5765907 | -4.1975833 | H    | 0.686802   | 9.1267721  | -2.8570058 |
| C    | -2.6124956 | 11.40684  | -0.7571016 | H    | -2.4043966 | 6.4035132  | -0.2204029 |
| C    | -3.7142331 | 11.970313 | 0.0075387  | H    | -1.1854444 | 10.729827  | -2.9962847 |
| C    | -4.9900854 | 11.749012 | -0.3757086 | H    | -5.38144   | 10.442767  | -4.0468914 |
| O    | -5.3239849 | 11.021984 | -1.459525  | H    | -5.7181518 | 9.0649222  | -3.0050656 |
| C    | -1.3090886 | 11.602064 | -0.3788326 | H    | -4.234324  | 8.7586013  | -5.1735023 |
| C    | -0.958097  | 12.328959 | 0.8173108  | H    | -1.7987448 | 8.8918019  | -4.673214  |
| C    | -2.0289089 | 13.206567 | 1.5027035  | H    | -5.8511607 | 12.134736  | 0.1553627  |
| C    | -3.485303  | 12.799256 | 1.2247513  | H    | -0.4832402 | 11.134815  | -0.9008034 |
| O    | -1.7482691 | 13.219489 | 2.9037404  | H    | -2.0264469 | 14.743675  | -0.0482181 |
| C    | -1.8742995 | 12.00006  | 3.52505    | H    | -2.5636243 | 15.294852  | 1.5607507  |
| C    | -1.2082473 | 11.989913 | 4.8365082  | H    | -0.8303718 | 14.987716  | 1.2478553  |
| C    | -1.8500574 | 14.659907 | 1.0290654  | H    | 1.9962457  | 6.3161619  | 1.388604   |
| O    | 1.7478623  | 3.5085694 | -0.3953522 | H    | 1.5494678  | 4.6759105  | 1.9255693  |
| C    | 1.2765072  | 2.9984941 | -1.5787082 | H    | 3.1586016  | 4.9798619  | 1.2071496  |
| C    | 1.8648791  | 1.6827804 | -1.872846  | H    | -3.182654  | 11.422924  | -6.7567474 |
| C    | 2.0992848  | 5.2477071 | 1.1734476  | H    | -2.8160026 | 5.8502917  | -3.7847736 |
| O    | -0.7642112 | 4.5603268 | 0.4036624  | H    | 4.8336413  | 0.0085276  | -1.6672946 |
| O    | 3.4576569  | 5.1429631 | -1.6139684 | H    | 1.020718   | -1.4038109 | -3.0813294 |
| O    | -4.4015261 | 13.23334  | 1.8977351  | H    | -1.6492768 | 10.880147  | 8.0410767  |
| O    | 0.1782693  | 12.322262 | 1.2975684  | H    | 1.6296629  | 13.112315  | 6.3675683  |

|                                                               |            |           |            |   |            |             |            |
|---------------------------------------------------------------|------------|-----------|------------|---|------------|-------------|------------|
| C                                                             | -2.5372494 | 10.815568 | -5.0986033 | H | -0.866057  | -0.0636605  | -3.0626132 |
| C                                                             | -3.8277718 | 7.4371208 | -3.6109552 | H | -0.9468618 | 1.2906245   | -1.9190625 |
| O                                                             | -1.9493688 | 11.850666 | -4.8827978 | H | -0.50687   | 1.5955373   | -3.5899961 |
| O                                                             | -3.264933  | 10.610789 | -6.2209249 | H | 3.7485411  | 3.2619579   | -1.1542863 |
| O                                                             | -2.768932  | 6.7663844 | -4.1202316 | H | 4.3787142  | -2.1311618  | -2.3896804 |
| O                                                             | -4.6497018 | 6.9256814 | -2.8871521 | H | -3.4961294 | 10.280593   | 6.7772466  |
| O                                                             | 0.4715031  | 3.6196721 | -2.252877  | H | -3.9009441 | 11.243043   | 5.3426009  |
| O                                                             | -2.4742303 | 11.085088 | 2.9881275  | H | -3.0397426 | 9.7274745   | 5.1507084  |
| C                                                             | 3.2399198  | 1.4359802 | -1.6122735 | H | 1.419159   | 12.487416   | 8.5748332  |
| C                                                             | 3.7767893  | 0.1671094 | -1.8640481 | H | 0.3865406  | 13.027793   | 3.130062   |
| <b>NImag</b>                                                  |            |           |            |   |            | 0           |            |
| <b><math>\Sigma</math> Electronic and thermal Free Energy</b> |            |           |            |   |            | -1865696.16 |            |
| <b>mol Fraction</b>                                           |            |           |            |   |            | 1.87E-05    |            |

**(8S, 13S, 8aS, 12aS, 13aS)-Diazaphilonic acid (2) - Conformer 24**

| Atom | X          | Y         | Z          | Atom | X          | Y          | Z          |
|------|------------|-----------|------------|------|------------|------------|------------|
| C    | 2.0579111  | 7.1678649 | -1.8448788 | C    | 2.6922373  | -0.9090583 | -1.9742588 |
| C    | 0.7409518  | 7.4896606 | -1.6869591 | C    | 3.3398438  | -0.2023954 | -0.9481771 |
| C    | -0.1679188 | 6.676084  | -0.8897887 | C    | 3.0707565  | 1.1389412  | -0.7191419 |
| C    | 0.3020709  | 5.4434114 | -0.2038863 | C    | -0.5710421 | 13.404908  | 5.4969327  |
| C    | 1.8259688  | 5.2207659 | -0.1716528 | C    | -0.2494379 | 13.325371  | 6.8436166  |
| C    | 2.6454495  | 5.9797509 | -1.2543115 | C    | -0.5645998 | 12.185071  | 7.6004427  |
| C    | 0.1113543  | 8.6365788 | -2.3127637 | C    | -1.1878069 | 11.094192  | 7.0115167  |
| C    | -1.2018819 | 8.9014074 | -2.1572745 | C    | -1.5119411 | 11.137413  | 5.6519342  |
| O    | -2.0082607 | 8.1101277 | -1.3732913 | C    | 3.8439171  | 1.8228028  | 0.3866645  |
| C    | -1.4686388 | 7.0238687 | -0.7759998 | O    | 0.6271358  | 1.6363635  | -3.4674765 |
| C    | -1.9647589 | 10.022833 | -2.8295213 | O    | 3.0153343  | -2.2228057 | -2.1131585 |
| C    | -2.9945826 | 10.661088 | -1.9087279 | C    | -0.1618089 | 14.660999  | 4.7599468  |
| C    | -4.3155811 | 10.480699 | -2.1413983 | O    | -0.2172628 | 12.206349  | 8.9149819  |
| C    | -4.9463854 | 9.710922  | -3.261847  | O    | -2.0935292 | 10.038119  | 5.1478338  |
| C    | -3.944569  | 8.8623599 | -4.0528263 | H    | 2.7088791  | 7.7661533  | -2.4752923 |
| C    | -2.5783007 | 9.5786609 | -4.1876526 | H    | 0.7083561  | 9.2974961  | -2.9335059 |
| C    | -2.5515803 | 11.485061 | -0.7822075 | H    | -2.1948277 | 6.4637555  | -0.2002748 |
| C    | -3.6293607 | 12.047832 | 0.0194355  | H    | -1.2265135 | 10.791698  | -3.0793285 |
| C    | -4.9174149 | 11.800298 | -0.3004548 | H    | -5.4443338 | 10.424942  | -3.9317001 |
| O    | -5.2898994 | 11.048128 | -1.3546091 | H    | -5.7291771 | 9.0668475  | -2.8492925 |
| C    | -1.2415411 | 11.716863 | -0.4687108 | H    | -4.3343362 | 8.7210046  | -5.067463  |
| C    | -0.8308307 | 12.508628 | 0.6778962  | H    | -1.8800265 | 8.8878598  | -4.6744304 |
| C    | -1.9039346 | 13.362722 | 1.4028844  | H    | -5.7595495 | 12.183072  | 0.2622638  |
| C    | -3.3578675 | 12.896629 | 1.2100438  | H    | -0.4296893 | 11.264741  | -1.0249626 |
| O    | -1.5919035 | 13.437435 | 2.8028028  | H    | -2.0220042 | 14.850031  | -0.1848868 |
| C    | -1.6561694 | 12.269237 | 3.4723391  | H    | -2.5059128 | 15.438837  | 1.4265636  |
| C    | -1.2348602 | 12.303144 | 4.8707446  | H    | -0.7769706 | 15.166679  | 1.045385   |
| C    | -1.7965711 | 14.80643  | 0.8857093  | H    | 2.154739   | 6.7266622  | 1.368041   |
| O    | 2.1164976  | 3.8157604 | -0.2574103 | H    | 1.8205764  | 5.0891404  | 1.9863813  |
| C    | 1.7159131  | 3.2074312 | -1.3895985 | H    | 3.4142717  | 5.474989   | 1.2651872  |
| C    | 2.1161238  | 1.8105427 | -1.545861  | H    | -3.3799662 | 11.340123  | -6.7692482 |
| C    | 2.3381962  | 5.6589668 | 1.2098439  | H    | -2.8475983 | 5.8546112  | -3.6878321 |
| O    | -0.4562809 | 4.6884999 | 0.3771781  | H    | 1.2832843  | -0.7924106 | -3.6208014 |
| O    | 3.7768493  | 5.5879726 | -1.5109293 | H    | 4.0661601  | -0.7305626 | -0.3399557 |
| O    | -4.244368  | 13.28937  | 1.9471433  | H    | 0.2614183  | 14.14462   | 7.3378599  |
| O    | 0.3335711  | 12.59124  | 1.0478982  | H    | -1.4249243 | 10.193073  | 7.5700589  |

|                                                               |            |            |            |   |            |              |            |
|---------------------------------------------------------------|------------|------------|------------|---|------------|--------------|------------|
| C                                                             | -2.6589516 | 10.789527  | -5.1230632 | H | 4.6148766  | 1.148206     | 0.7697996  |
| C                                                             | -3.8485736 | 7.4420323  | -3.4945399 | H | 4.3228941  | 2.7400576    | 0.0324999  |
| O                                                             | -2.076906  | 11.838203  | -4.9644737 | H | 3.1915552  | 2.1077261    | 1.2179155  |
| O                                                             | -3.4298496 | 10.542619  | -6.2081856 | H | 0.5730136  | 2.5997211    | -3.2402059 |
| O                                                             | -2.8165386 | 6.7621653  | -4.0466767 | H | 2.5117823  | -2.5966429   | -2.8537312 |
| O                                                             | -4.6275596 | 6.9417994  | -2.717291  | H | 0.4476645  | 15.290877    | 5.414179   |
| O                                                             | 1.0252939  | 3.8318561  | -2.2111506 | H | 0.4144849  | 14.428018    | 3.8600109  |
| O                                                             | -2.0796503 | 11.256247  | 2.8940209  | H | -1.0320361 | 15.240514    | 4.4366346  |
| C                                                             | 1.5002374  | 1.081823   | -2.6109591 | H | -0.479369  | 11.367181    | 9.3260166  |
| C                                                             | 1.7809795  | -0.2737355 | -2.8062185 | H | -2.2222401 | 10.193789    | 4.1777665  |
| <b>NImag</b>                                                  |            |            |            |   |            | 0            |            |
| <b><math>\Sigma</math> Electronic and thermal Free Energy</b> |            |            |            |   |            | -1865701.096 |            |
| <b>mol Fraction</b>                                           |            |            |            |   |            | 0.078477487  |            |



**(8S, 13S, 8aS, 12aS, 13aS)-Diazaphilonic acid (2) - Conformer 25**

| Atom | X          | Y         | Z          | Atom | X          | Y          | Z          |
|------|------------|-----------|------------|------|------------|------------|------------|
| C    | 2.8863505  | 7.051994  | -1.6438327 | C    | 1.2456582  | -0.2358176 | -4.0972115 |
| C    | 1.6379269  | 7.3758424 | -1.1881626 | C    | 2.5032717  | 0.1285721  | -3.6077926 |
| C    | 0.9068857  | 6.5308396 | -0.2574193 | C    | 2.6875889  | 1.3216121  | -2.9138576 |
| C    | 1.4824801  | 5.2590667 | 0.2390622  | C    | -2.1435429 | 12.415682  | 6.1986692  |
| C    | 2.8232404  | 4.7920388 | -0.3787618 | C    | -1.6359833 | 12.909972  | 7.3925125  |
| C    | 3.4771723  | 5.7524238 | -1.4143727 | C    | -0.7266382 | 13.978148  | 7.3886878  |
| C    | 0.8767743  | 8.4999567 | -1.6889027 | C    | -0.3081514 | 14.551755  | 6.1942836  |
| C    | -0.4345932 | 8.639854  | -1.4022037 | C    | -0.810773  | 14.076888  | 4.9765231  |
| O    | -1.0575066 | 7.8506884 | -0.4686132 | C    | 4.0843334  | 1.6361292  | -2.4233164 |
| C    | -0.369264  | 6.8234233 | 0.0737372  | O    | -0.7423402 | 2.6517267  | -3.0585047 |
| C    | -1.4111838 | 9.5035255 | -2.1746899 | O    | 1.1530348  | -1.4240894 | -4.7519602 |
| C    | -2.6498385 | 9.8591849 | -1.3748263 | C    | -3.119586  | 11.261676  | 6.2396845  |
| C    | -3.7899892 | 9.1534489 | -1.5774111 | O    | -0.2714902 | 14.406243  | 8.6003674  |
| C    | -4.0103091 | 8.0198977 | -2.5314017 | O    | -0.299297  | 14.662825  | 3.8750909  |
| C    | -2.768744  | 7.6255598 | -3.3516076 | H    | 3.405406   | 7.6951284  | -2.3483053 |
| C    | -1.7924712 | 8.8079221 | -3.5242632 | H    | 1.3201991  | 9.151401   | -2.4358144 |
| C    | -2.6050397 | 10.927526 | -0.3834517 | H    | -0.9695776 | 6.2324881  | 0.7526719  |
| C    | -3.8656175 | 11.179455 | 0.296412   | H    | -0.8857904 | 10.425742  | -2.4391521 |
| C    | -4.9504542 | 10.425523 | 0.012327   | H    | -4.8262867 | 8.31054    | -3.2027161 |
| O    | -4.9483835 | 9.4311134 | -0.8948123 | H    | -4.3535581 | 7.1484409  | -1.9623709 |
| C    | -1.4704669 | 11.635335 | -0.0741596 | H    | -3.10852   | 7.3617998  | -4.3603722 |
| C    | -1.4552423 | 12.642315 | 0.9570837  | H    | -0.8668426 | 8.4428583  | -3.980614  |
| C    | -2.8006048 | 13.191677 | 1.4845531  | H    | -5.9113882 | 10.554716  | 0.4944177  |
| C    | -4.0034958 | 12.246264 | 1.326444   | H    | -0.50901   | 11.398276  | -0.5147341 |
| O    | -2.6105121 | 13.573236 | 2.8481921  | H    | -3.2724189 | 14.301744  | -0.335479  |
| C    | -2.3243699 | 12.534856 | 3.7016423  | H    | -4.0441467 | 14.921461  | 1.1480427  |
| C    | -1.7595775 | 13.019961 | 4.9710015  | H    | -2.3022035 | 15.199891  | 0.8574778  |
| C    | -3.1277101 | 14.494118 | 0.7325903  | H    | 4.0569326  | 5.4245281  | 1.2853094  |
| O    | 2.594318   | 3.5034068 | -1.0235467 | H    | 3.3933776  | 3.7806292  | 1.4353957  |
| C    | 1.6785671  | 3.4856424 | -2.0139556 | H    | 4.746147   | 4.1145955  | 0.3009734  |
| C    | 1.5786813  | 2.1910584 | -2.7172608 | H    | -1.9964223 | 11.482365  | -5.3067424 |
| C    | 3.8246492  | 4.5037542 | 0.7393883  | H    | -0.5021674 | 5.2965276  | -3.0537899 |
| O    | 0.9348981  | 4.5759992 | 1.0865405  | H    | -0.8312162 | 0.332593   | -4.3032727 |
| O    | 4.4756065  | 5.3564761 | -2.0116107 | H    | 3.3384721  | -0.5407998 | -3.7833875 |
| O    | -5.0432588 | 12.44199  | 1.9280944  | H    | -1.9343813 | 12.482206  | 8.3437287  |
| O    | -0.4154438 | 13.132498 | 1.4067605  | H    | 0.4258374  | 15.352744  | 6.1703776  |

|                                                               |            |           |            |   |            |              |            |
|---------------------------------------------------------------|------------|-----------|------------|---|------------|--------------|------------|
| C                                                             | -2.3759825 | 9.8227877 | -4.5064318 | H | 4.8078198  | 0.9905006    | -2.92944   |
| C                                                             | -2.1103523 | 6.3387082 | -2.8224603 | H | 4.3651497  | 2.679138     | -2.5890644 |
| O                                                             | -3.4098857 | 9.696598  | -5.1242399 | H | 4.1663132  | 1.4587019    | -1.3455781 |
| O                                                             | -1.5685688 | 10.899767 | -4.6506586 | H | -1.5514027 | 2.2109303    | -3.3617997 |
| O                                                             | -0.9356599 | 6.1071171 | -3.4220381 | H | 0.2388532  | -1.5634106   | -5.0451379 |
| O                                                             | -2.6230568 | 5.60013   | -2.0078658 | H | -3.3891219 | 11.029734    | 7.2740231  |
| O                                                             | 1.0020446  | 4.4779401 | -2.2591774 | H | -4.0383289 | 11.484291    | 5.6863542  |
| O                                                             | -2.535331  | 11.380346 | 3.3748321  | H | -2.6906981 | 10.366167    | 5.7798378  |
| C                                                             | 0.317543   | 1.8178693 | -3.2436449 | H | 0.3442637  | 15.143135    | 8.4618427  |
| C                                                             | 0.1494515  | 0.6068203 | -3.9166934 | H | -0.5488368 | 14.193631    | 3.0486973  |
| <b>NImag</b>                                                  |            |           |            |   |            | 0            |            |
| <b><math>\Sigma</math> Electronic and thermal Free Energy</b> |            |           |            |   |            | -1865689.227 |            |
| <b>mol Fraction</b>                                           |            |           |            |   |            | 1.53E-10     |            |

**(8S, 13S, 8aS, 12aS, 13aS)-Diazaphilonic acid (2) - Conformer 26**

| Atom | X          | Y         | Z          | Atom | X          | Y          | Z          |
|------|------------|-----------|------------|------|------------|------------|------------|
| C    | 2.0748947  | 7.1113234 | -1.7959676 | C    | 2.4039468  | -1.0477422 | -2.2436624 |
| C    | 0.7525003  | 7.3983993 | -1.6355096 | C    | 1.9993211  | -0.5926756 | -0.9866196 |
| C    | -0.1501355 | 6.5161297 | -0.9059855 | C    | 1.7736129  | 0.7633896  | -0.7546462 |
| C    | 0.3371713  | 5.2514524 | -0.2980942 | C    | -1.6753593 | 11.559448  | 5.9862548  |
| C    | 1.8619523  | 5.031764  | -0.2776462 | C    | -1.0157559 | 11.704898  | 7.1989231  |
| C    | 2.6795501  | 5.8918805 | -1.2838514 | C    | 0.1416749  | 12.492801  | 7.2873199  |
| C    | 0.1052959  | 8.567154  | -2.202378  | C    | 0.6554403  | 13.130493  | 6.164718   |
| C    | -1.2185285 | 8.7807556 | -2.067995  | C    | 0.0048464  | 13.006419  | 4.9309901  |
| O    | -2.0200467 | 7.9252752 | -1.3481467 | C    | 1.3365716  | 1.1797707  | 0.6333551  |
| C    | -1.4620991 | 6.8203031 | -0.8016285 | O    | 2.4974485  | 2.1097377  | -4.0916647 |
| C    | -2.0065859 | 9.9002357 | -2.7153085 | O    | 2.6149495  | -2.3868669 | -2.386327  |
| C    | -3.0899098 | 10.450914 | -1.8016665 | C    | -2.9184375 | 10.700771  | 5.9270867  |
| C    | -4.3867816 | 10.128913 | -2.0318878 | O    | 0.7337292  | 12.58501   | 8.5115361  |
| C    | -4.9377085 | 9.2838809 | -3.1383844 | O    | 0.615121   | 13.616756  | 3.8949198  |
| C    | -3.8617203 | 8.6196733 | -4.0112235 | H    | 2.7238225  | 7.7624104  | -2.3741957 |
| C    | -2.5818602 | 9.4759231 | -4.1047948 | H    | 0.6949322  | 9.2747693  | -2.7771022 |
| C    | -2.7319609 | 11.311859 | -0.6774598 | H    | -2.1856632 | 6.2055812  | -0.2814931 |
| C    | -3.8583824 | 11.777442 | 0.1164724  | H    | -1.286049  | 10.698768  | -2.9134659 |
| C    | -5.1152102 | 11.398253 | -0.2018965 | H    | -5.5736058 | 9.9242125  | -3.7604898 |
| O    | -5.4081363 | 10.600212 | -1.2458446 | H    | -5.5818145 | 8.5121892  | -2.7038894 |
| C    | -1.4427017 | 11.653503 | -0.3555183 | H    | -4.2612905 | 8.5470375  | -5.0305849 |
| C    | -1.1282377 | 12.453511 | 0.802575   | H    | -1.8016213 | 8.9070489  | -4.6213146 |
| C    | -2.2616448 | 13.236447 | 1.5028568  | H    | -5.9919089 | 11.701457  | 0.3565548  |
| C    | -3.6752604 | 12.666976 | 1.2976289  | H    | -0.5916595 | 11.249555  | -0.8901545 |
| O    | -1.9318415 | 13.331456 | 2.889824   | H    | -2.4849469 | 14.708402  | -0.0944594 |
| C    | -1.9017873 | 12.129796 | 3.5563406  | H    | -3.0156356 | 15.256819  | 1.5172685  |
| C    | -1.1877663 | 12.240506 | 4.837853   | H    | -1.272649  | 15.124794  | 1.1416576  |
| C    | -2.2587262 | 14.682638 | 0.9765021  | H    | 2.2160815  | 6.3992657  | 1.3835642  |
| O    | 2.1415752  | 3.6397905 | -0.4893088 | H    | 1.8484818  | 4.7231063  | 1.864926   |
| C    | 1.6685464  | 3.1419224 | -1.6634935 | H    | 3.448367   | 5.133224   | 1.172474   |
| C    | 1.9368735  | 1.6891406 | -1.8160817 | H    | -2.0164206 | 12.251307  | -5.6407309 |
| C    | 2.3764836  | 5.3445301 | 1.1366265  | H    | -2.4246546 | 5.7332457  | -3.9111629 |
| O    | -0.4189719 | 4.4496129 | 0.2250578  | H    | 2.8884769  | -0.4977287 | -4.2786008 |
| O    | 3.8265927  | 5.557493  | -1.5451675 | H    | 1.8611636  | -1.3188085 | -0.1925835 |
| O    | -4.6068    | 13.024327 | 1.9944685  | H    | -1.3837148 | 11.216208  | 8.0948002  |
| O    | 0.0192337  | 12.586433 | 1.2367785  | H    | 1.5727697  | 13.711551  | 6.2062046  |

|                                                               |            |            |            |   |            |              |            |
|---------------------------------------------------------------|------------|------------|------------|---|------------|--------------|------------|
| C                                                             | -2.8512076 | 10.700113  | -4.9806757 | H | 0.9749772  | 0.3088867    | 1.1881153  |
| C                                                             | -3.6148667 | 7.1678936  | -3.5997391 | H | 2.1745343  | 1.6132287    | 1.1900828  |
| O                                                             | -3.8758006 | 10.921924  | -5.5869639 | H | 0.5478153  | 1.9360761    | 0.6135671  |
| O                                                             | -1.774441  | 11.516201  | -5.0456205 | H | 2.8406602  | 1.6459258    | -4.8710181 |
| O                                                             | -2.4994758 | 6.6690404  | -4.1809057 | H | 2.8869988  | -2.5734761   | -3.2983758 |
| O                                                             | -4.3479758 | 6.5054067  | -2.9026402 | H | -3.2040583 | 10.377634    | 6.9321888  |
| O                                                             | 1.0870493  | 3.8489724  | -2.4658795 | H | -3.7646839 | 11.237548    | 5.4848772  |
| O                                                             | -2.4203772 | 11.136765  | 3.0770743  | H | -2.7560964 | 9.8141137    | 5.3067337  |
| C                                                             | 2.3294631  | 1.2108597  | -3.0851437 | H | 1.5166619  | 13.153599    | 8.4400294  |
| C                                                             | 2.5724565  | -0.1487668 | -3.2960406 | H | 0.2226351  | 13.37024     | 3.028991   |
| <b>NImag</b>                                                  |            |            |            |   |            | 0            |            |
| <b><math>\Sigma</math> Electronic and thermal Free Energy</b> |            |            |            |   |            | -1865687.122 |            |
| <b>mol Fraction</b>                                           |            |            |            |   |            | 4.37E-12     |            |

**(8S, 13S, 8aS, 12aS, 13aS)-Diazaphilonic acid (2) - Conformer 27**

| Atom | X          | Y         | Z          | Atom | X          | Y          | Z          |
|------|------------|-----------|------------|------|------------|------------|------------|
| C    | 1.5668462  | 7.1955463 | -2.5550038 | C    | 2.392645   | -0.2110748 | -0.1366145 |
| C    | 0.4360278  | 7.8209901 | -2.0964788 | C    | 1.0397169  | 0.1153993  | 0.0418537  |
| C    | -0.1446751 | 7.5443715 | -0.7885897 | C    | 0.6121455  | 1.4295646  | -0.0852063 |
| C    | 0.5340151  | 6.6319144 | 0.1629993  | C    | -1.2839511 | 11.208437  | 5.1574868  |
| C    | 1.9007394  | 6.0747426 | -0.2756058 | C    | -0.8800309 | 10.494162  | 6.2858988  |
| C    | 2.2219044  | 6.1737412 | -1.7854758 | C    | -0.448043  | 9.1672274  | 6.1840237  |
| C    | -0.2886986 | 8.8007968 | -2.8753337 | C    | -0.4305775 | 8.5230401  | 4.9496005  |
| C    | -1.4600307 | 9.3199821 | -2.4506612 | C    | -0.8507967 | 9.2139064  | 3.81356    |
| O    | -2.0099936 | 8.9440159 | -1.2552382 | C    | -0.8539014 | 1.7422999  | 0.1131759  |
| C    | -1.324773  | 8.1182665 | -0.4413826 | O    | 3.8919983  | 2.9631462  | -0.9488876 |
| C    | -2.2866944 | 10.355778 | -3.2058913 | O    | 2.7343695  | -1.5229783 | 0.0028562  |
| C    | -3.2374203 | 11.103871 | -2.2848168 | C    | -1.7470449 | 12.636074  | 5.3530966  |
| C    | -4.5779668 | 10.977178 | -2.4301179 | O    | -0.0376364 | 8.4502447  | 7.2667933  |
| C    | -5.298179  | 10.178687 | -3.4718631 | O    | -0.8366479 | 8.624552   | 2.5976241  |
| C    | -4.3838199 | 9.1449023 | -4.1362505 | H    | 1.9389745  | 7.3802997  | -3.5579451 |
| C    | -2.9975491 | 9.7419153 | -4.4554332 | H    | 0.1153528  | 9.1260436  | -3.8291944 |
| C    | -2.6891209 | 11.889332 | -1.1800855 | H    | -1.816618  | 7.9927628  | 0.513705   |
| C    | -3.6784615 | 12.367492 | -0.2283745 | H    | -1.5557064 | 11.072197  | -3.595366  |
| C    | -4.9941123 | 12.220236 | -0.4892642 | H    | -5.6997105 | 10.853881  | -4.2363361 |
| O    | -5.4672937 | 11.598853 | -1.5902766 | H    | -6.1449478 | 9.6763799  | -2.9962609 |
| C    | -1.3558329 | 12.117316 | -0.991612  | H    | -4.8332088 | 8.8468295  | -5.0912647 |
| C    | -0.8121927 | 12.692245 | 0.2240818  | H    | -2.3489434 | 8.9492825  | -4.8438203 |
| C    | -1.776387  | 13.199112 | 1.3336385  | H    | -5.7816078 | 12.568294  | 0.1668722  |
| C    | -3.280739  | 12.968756 | 1.0710806  | H    | -0.6084786 | 11.77764   | -1.7000574 |
| O    | -1.4131218 | 12.551765 | 2.5811511  | H    | -1.7613346 | 15.262982  | 0.6608136  |
| C    | -1.7135741 | 11.226004 | 2.6436354  | H    | -2.1623204 | 15.044221  | 2.3810437  |
| C    | -1.2726679 | 10.568509 | 3.8944951  | H    | -0.4724303 | 14.836664  | 1.8088032  |
| C    | -1.5271978 | 14.690787 | 1.565402   | H    | 2.958737   | 7.9081847  | 0.2598908  |
| O    | 2.0437219  | 4.7040908 | 0.1080834  | H    | 2.8132897  | 6.7112266  | 1.5731822  |
| C    | 1.1267854  | 3.853736  | -0.4562682 | H    | 3.9678643  | 6.4408665  | 0.2357735  |
| C    | 1.5597484  | 2.451375  | -0.3679619 | H    | -2.084227  | 11.959456  | -6.605985  |
| C    | 2.9860398  | 6.8410307 | 0.5017723  | H    | -3.3954699 | 6.2125924  | -3.2354115 |
| O    | 0.120816   | 6.3985481 | 1.2914062  | H    | 4.3684009  | 0.5283336  | -0.6367388 |
| O    | 3.0695678  | 5.4023371 | -2.2458168 | H    | 0.3394605  | -0.677125  | 0.2834268  |
| O    | -4.1030423 | 13.311432 | 1.9052316  | H    | -0.9067046 | 10.976223  | 7.261051   |
| O    | 0.3944802  | 12.790276 | 0.4193495  | H    | -0.0951443 | 7.4924465  | 4.8840683  |

|                                                               |            |           |            |   |            |              |            |
|---------------------------------------------------------------|------------|-----------|------------|---|------------|--------------|------------|
| C                                                             | -3.1165305 | 10.752738 | -5.5958712 | H | -1.3877882 | 0.8520099    | 0.4575717  |
| C                                                             | -4.3016922 | 7.8660188 | -3.3038611 | H | -1.0061305 | 2.5402169    | 0.8478626  |
| O                                                             | -4.1150979 | 10.972808 | -6.2441631 | H | -1.3130406 | 2.0875142    | -0.8182065 |
| O                                                             | -1.9334074 | 11.358282 | -5.8516377 | H | 3.5446441  | 3.8501081    | -1.1941233 |
| O                                                             | -3.3697007 | 7.0134499 | -3.7937508 | H | 3.6894956  | -1.6159167   | -0.1404888 |
| O                                                             | -5.0006771 | 7.6011433 | -2.3540972 | H | -1.9305118 | 12.829631    | 6.4143564  |
| O                                                             | 0.0988082  | 4.2849755 | -0.9524328 | H | -0.9917991 | 13.346302    | 5.0011941  |
| O                                                             | -2.2861254 | 10.672527 | 1.719256   | H | -2.6636444 | 12.852296    | 4.7974885  |
| C                                                             | 2.9213194  | 2.1042206 | -0.5829187 | H | -0.0951289 | 9.011071     | 8.0563292  |
| C                                                             | 3.3242791  | 0.7687468 | -0.4555571 | H | -0.4705817 | 7.720485     | 2.6206491  |
| <b>NImag</b>                                                  |            |           |            |   |            | 0            |            |
| <b><math>\Sigma</math> Electronic and thermal Free Energy</b> |            |           |            |   |            | -1865688.831 |            |
| <b>mol Fraction</b>                                           |            |           |            |   |            | 7.85E-11     |            |

**(8S, 13S, 8aS, 12aS, 13aS)-Diazaphilonic acid (2) - Conformer 28**

| Atom | X          | Y         | Z          | Atom | X          | Y         | Z          |
|------|------------|-----------|------------|------|------------|-----------|------------|
| C    | 2.6457835  | 6.7563791 | -2.063192  | C    | -0.4161444 | 3.2198448 | -3.4821582 |
| C    | 1.3624682  | 7.0569673 | -1.7057199 | C    | 0.8466145  | 3.2671882 | -4.0777704 |
| C    | 0.6856807  | 6.3707485 | -0.6148048 | C    | 1.9958634  | 3.1089829 | -3.3039342 |
| C    | 1.3901801  | 5.3570283 | 0.2035322  | C    | -1.5982799 | 11.014863 | 5.9594348  |
| C    | 2.8775295  | 5.0959045 | -0.100944  | C    | -0.9699028 | 11.273084 | 7.1695943  |
| C    | 3.4010662  | 5.6871463 | -1.4363708 | C    | 0.0311779  | 12.252516 | 7.2553915  |
| C    | 0.5463762  | 8.0526771 | -2.3731709 | C    | 0.4204928  | 12.971838 | 6.1319546  |
| C    | -0.7538772 | 8.2337063 | -2.0602234 | C    | -0.202909  | 12.736486 | 4.9006805  |
| O    | -1.3656393 | 7.485033  | -1.0811166 | C    | 3.3493424  | 3.0868992 | -3.9743139 |
| C    | -0.6246025 | 6.6074861 | -0.3743739 | O    | 0.3594558  | 2.4211545 | -0.0505239 |
| C    | -1.6870536 | 9.2513964 | -2.6965528 | O    | -1.5105563 | 3.4722475 | -4.2875996 |
| C    | -2.835307  | 9.62638   | -1.7786424 | C    | -2.6709728 | 9.9508118 | 5.9041909  |
| C    | -4.0479375 | 9.0575461 | -1.9807605 | O    | 0.6016713  | 12.445825 | 8.4773435  |
| C    | -4.4246347 | 8.060553  | -3.0316377 | O    | 0.2873652  | 13.445257 | 3.8632753  |
| C    | -3.3202295 | 7.7552115 | -4.0620079 | H    | 3.124655   | 7.2540008 | -2.9011046 |
| C    | -2.2111741 | 8.8269622 | -4.103065  | H    | 0.9874817  | 8.6660757 | -3.1529631 |
| C    | -2.6271683 | 10.558775 | -0.67641   | H    | -1.1943721 | 6.1089277 | 0.3996402  |
| C    | -3.8127073 | 10.82798  | 0.1218078  | H    | -1.0797615 | 10.14543  | -2.8655773 |
| C    | -4.9811858 | 10.217051 | -0.1723069 | H    | -5.3153211 | 8.4445298 | -3.5408785 |
| O    | -5.1319779 | 9.3511481 | -1.1937475 | H    | -4.7212242 | 7.1281629 | -2.5362701 |
| C    | -1.4151712 | 11.124149 | -0.3717007 | H    | -3.7830165 | 7.7721816 | -5.0558946 |
| C    | -1.2368232 | 11.981284 | 0.774952   | H    | -1.3629213 | 8.4428997 | -4.6787857 |
| C    | -2.4845949 | 12.562328 | 1.4780054  | H    | -5.8938591 | 10.367529 | 0.3905091  |
| C    | -3.7815218 | 11.757351 | 1.2863716  | H    | -0.5102318 | 10.870544 | -0.9118135 |
| O    | -2.1678458 | 12.71738  | 2.8627819  | H    | -2.9660902 | 13.967029 | -0.1225954 |
| C    | -1.9313206 | 11.539962 | 3.531946   | H    | -3.5735164 | 14.423276 | 1.490526   |
| C    | -1.2426379 | 11.772579 | 4.8100366  | H    | -1.8359527 | 14.590731 | 1.1041028  |
| C    | -2.7323978 | 13.985131 | 0.9469568  | H    | 3.5042521  | 6.8568887 | 1.0436947  |
| O    | 3.1930853  | 3.6966964 | 0.0311737  | H    | 3.3750216  | 5.3481388 | 1.986693   |
| C    | 3.067977   | 2.7998166 | -1.0233151 | H    | 4.7431366  | 5.5866509 | 0.855545   |
| C    | 1.8640932  | 2.9535545 | -1.9018661 | H    | -2.1712364 | 11.76106  | -5.4346767 |
| C    | 3.6811426  | 5.7761472 | 1.0287326  | H    | -1.5317036 | 5.1582598 | -4.7778523 |
| O    | 0.8432394  | 4.7731728 | 1.1278364  | H    | -1.541107  | 2.8414137 | -1.6669999 |
| O    | 4.4694003  | 5.2800277 | -1.8811256 | H    | 0.9226687  | 3.4243915 | -5.1490978 |
| O    | -4.7588916 | 11.961619 | 1.9817505  | H    | -1.2424801 | 10.726437 | 8.0660441  |
| O    | -0.1271365 | 12.315123 | 1.1980842  | H    | 1.2213238  | 13.705255 | 6.1711036  |

|                                                               |            |           |            |   |            |              |            |
|---------------------------------------------------------------|------------|-----------|------------|---|------------|--------------|------------|
| C                                                             | -2.7199752 | 10.053663 | -4.862653  | H | 3.2418141  | 3.2056284    | -5.0563095 |
| C                                                             | -2.7729205 | 6.3325797 | -3.9500823 | H | 4.0070555  | 3.8766624    | -3.5984384 |
| O                                                             | -3.8087837 | 10.158468 | -5.3808088 | H | 3.8530056  | 2.1350377    | -3.7771476 |
| O                                                             | -1.7820767 | 11.025985 | -4.9234107 | H | 1.0412754  | 2.7877386    | 0.542984   |
| O                                                             | -1.7829303 | 6.1212305 | -4.821523  | H | -2.2936833 | 3.6366819    | -3.7229223 |
| O                                                             | -3.2298485 | 5.4670928 | -3.2198158 | H | -2.8920249 | 9.5831556    | 6.9101997  |
| O                                                             | 3.8689427  | 1.907018  | -1.1058549 | H | -3.5998932 | 10.329901    | 5.4646913  |
| O                                                             | -2.2757549 | 10.472412 | 3.0547061  | H | -2.3567815 | 9.1059158    | 5.2838484  |
| C                                                             | 0.578109   | 2.7880502 | -1.3395817 | H | 1.2717875  | 13.143865    | 8.4056589  |
| C                                                             | -0.5650139 | 2.9387676 | -2.1317942 | H | -0.062918  | 13.136762    | 2.9997816  |
| <b>NImag</b>                                                  |            |           |            |   |            | 0            |            |
| <b><math>\Sigma</math> Electronic and thermal Free Energy</b> |            |           |            |   |            | -1865684.231 |            |
| <b>mol Fraction</b>                                           |            |           |            |   |            | 3.31E-14     |            |



**(8S, 13S, 8aS, 12aS, 13aS)-Diazaphilonic acid (2) - Conformer 29**

| Atom | X          | Y         | Z          | Atom | X          | Y          | Z          |
|------|------------|-----------|------------|------|------------|------------|------------|
| C    | 1.9810038  | 7.2314058 | -1.8676203 | C    | 2.8292632  | -0.8039633 | -2.1684087 |
| C    | 0.6538634  | 7.5155572 | -1.7212614 | C    | 3.4734533  | -0.0882646 | -1.1449204 |
| C    | -0.2418226 | 6.6684253 | -0.9446247 | C    | 3.162898   | 1.2404524  | -0.8853542 |
| C    | 0.2529595  | 5.440938  | -0.2671319 | C    | -0.9104636 | 13.315817  | 5.512871   |
| C    | 1.7815558  | 5.2526175 | -0.2272356 | C    | -0.6048444 | 13.231853  | 6.8630241  |
| C    | 2.592807   | 6.0511868 | -1.2872894 | C    | -0.8999271 | 12.076493  | 7.6049385  |
| C    | 0.0010966  | 8.6526468 | -2.3408954 | C    | -1.4860254 | 10.975246  | 6.9975056  |
| C    | -1.3207068 | 8.8799647 | -2.1985732 | C    | -1.7928787 | 11.022923  | 5.6340517  |
| O    | -2.1143309 | 8.0581127 | -1.4335392 | C    | 3.936766   | 1.9343467  | 0.2138159  |
| C    | -1.552697  | 6.9799396 | -0.8422128 | O    | 0.6524487  | 1.6921257  | -3.5774965 |
| C    | -2.1057922 | 9.9877831 | -2.8677483 | O    | 3.1195806  | -2.1085658 | -2.4213603 |
| C    | -3.1641602 | 10.586784 | -1.9529678 | C    | -0.5247764 | 14.589197  | 4.7930646  |
| C    | -4.4767163 | 10.373011 | -2.2045253 | O    | -0.5709993 | 12.094317  | 8.9242939  |
| C    | -5.0720582 | 9.5992002 | -3.3414541 | O    | -2.3381607 | 9.9135204  | 5.1118425  |
| C    | -4.0374918 | 8.7876794 | -4.1291459 | H    | 2.6225388  | 7.8552068  | -2.4827756 |
| C    | -2.6899108 | 9.5426625 | -4.238492  | H    | 0.5872182  | 9.3366166  | -2.9468442 |
| C    | -2.758024  | 11.409352 | -0.8116762 | H    | -2.2701382 | 6.3937582  | -0.2816782 |
| C    | -3.86076   | 11.933465 | -0.0178253 | H    | -1.3860082 | 10.779491  | -3.0994388 |
| C    | -5.1374575 | 11.654534 | -0.3568937 | H    | -5.5812193 | 10.306994  | -4.0094813 |
| O    | -5.4759253 | 10.904482 | -1.4239021 | H    | -5.8417632 | 8.9290799  | -2.9461149 |
| C    | -1.4588127 | 11.672855 | -0.4785912 | H    | -4.4105324 | 8.6475159  | -5.1501963 |
| C    | -1.084387  | 12.462017 | 0.6821116  | H    | -1.9669593 | 8.8769016  | -4.7241352 |
| C    | -2.1894026 | 13.279099 | 1.4017775  | H    | -5.9967582 | 12.007781  | 0.1991441  |
| C    | -3.6275334 | 12.775828 | 1.185372   | H    | -0.6279949 | 11.249245  | -1.0292628 |
| O    | -1.8973063 | 13.347824 | 2.8062215  | H    | -2.3278112 | 14.778954  | -0.1725308 |
| C    | -1.9383237 | 12.171586 | 3.4633727  | H    | -2.8480501 | 15.337779  | 1.4382847  |
| C    | -1.5364681 | 12.203034 | 4.8675886  | H    | -1.1076221 | 15.116626  | 1.0768979  |
| C    | -2.1148998 | 14.730484 | 0.9004098  | H    | 2.0633073  | 6.7313363  | 1.3470756  |
| O    | 2.104889   | 3.8564292 | -0.3419813 | H    | 1.7620697  | 5.0736019  | 1.9268039  |
| C    | 1.7241489  | 3.2650751 | -1.4905015 | H    | 3.3524971  | 5.5118835  | 1.2278552  |
| C    | 2.1693117  | 1.885824  | -1.6806356 | H    | -3.5073105 | 11.31112   | -6.8103365 |
| C    | 2.2728827  | 5.6718579 | 1.1673424  | H    | -2.8633872 | 5.8064459  | -3.7863314 |
| O    | -0.4905192 | 4.6632857 | 0.3030779  | H    | 1.3963558  | -0.7294914 | -3.7773202 |
| O    | 3.7372613  | 5.6926045 | -1.5363429 | H    | 4.2381116  | -0.5826903 | -0.5492945 |
| O    | -4.533568  | 13.13606  | 1.9152843  | H    | -0.122507  | 14.059501  | 7.3717221  |
| O    | 0.0724432  | 12.57125  | 1.0686589  | H    | -1.706697  | 10.062876  | 7.5444078  |

|                                                               |            |            |            |   |            |              |            |
|---------------------------------------------------------------|------------|------------|------------|---|------------|--------------|------------|
| C                                                             | -2.792222  | 10.761703  | -5.1611179 | H | 4.7502919  | 1.2893431    | 0.5592078  |
| C                                                             | -3.9092597 | 7.3640653  | -3.5856905 | H | 4.3612858  | 2.8811524    | -0.1314817 |
| O                                                             | -2.2413818 | 11.824048  | -4.9831478 | H | 3.2972197  | 2.168782     | 1.0704193  |
| O                                                             | -3.5422211 | 10.506249  | -6.258752  | H | 0.5759908  | 2.6498521    | -3.3387497 |
| O                                                             | -2.8527234 | 6.7191562  | -4.1331524 | H | 3.7983586  | -2.4082858   | -1.7962194 |
| O                                                             | -4.6832146 | 6.8341712  | -2.8232198 | H | 0.0597814  | 15.228273    | 5.4609753  |
| O                                                             | 1.0141346  | 3.8870047  | -2.2961508 | H | 0.0686645  | 14.380014    | 3.8984416  |
| O                                                             | -2.3264608 | 11.153298  | 2.8698544  | H | -1.4056638 | 15.149073    | 4.4640548  |
| C                                                             | 1.5593436  | 1.1502796  | -2.7482472 | H | -0.8169452 | 11.244867    | 9.3240345  |
| C                                                             | 1.8798182  | -0.1899859 | -2.9717263 | H | -2.457908  | 10.075089    | 4.1415747  |
| <b>NImag</b>                                                  |            |            |            |   |            | 0            |            |
| <b><math>\Sigma</math> Electronic and thermal Free Energy</b> |            |            |            |   |            | -1865700.729 |            |
| <b>mol Fraction</b>                                           |            |            |            |   |            | 0.042205142  |            |

**(8S, 13S, 8aS, 12aS, 13aS)-Diazaphilonic acid (2) - Conformer 30**

| Atom | X          | Y         | Z          | Atom | X          | Y          | Z          |
|------|------------|-----------|------------|------|------------|------------|------------|
| C    | 2.0201907  | 7.006455  | -1.8513502 | C    | 2.6246942  | -1.1108499 | -2.1002039 |
| C    | 0.7089696  | 7.3644649 | -1.7441278 | C    | 2.8074378  | -0.2131852 | -3.1563366 |
| C    | -0.2689836 | 6.5251139 | -1.0637818 | C    | 2.4555976  | 1.1303509  | -3.0220087 |
| C    | 0.1244578  | 5.2280669 | -0.4482409 | C    | -0.5938192 | 13.442038  | 5.4596721  |
| C    | 1.6362699  | 4.9573865 | -0.33054   | C    | -0.2872549 | 13.367672  | 6.8101403  |
| C    | 2.5316078  | 5.7505181 | -1.3265838 | C    | -0.6016549 | 12.22607   | 7.5653359  |
| C    | 0.1500531  | 8.5712127 | -2.3246282 | C    | -1.2086272 | 11.128906  | 6.9712241  |
| C    | -1.1630889 | 8.8616655 | -2.2320828 | C    | -1.5171394 | 11.166833  | 5.607809   |
| O    | -2.0375878 | 8.0460951 | -1.5533529 | C    | 2.6818779  | 2.0554844  | -4.1966618 |
| C    | -1.5645714 | 6.9019581 | -1.0056132 | O    | 1.2113919  | 1.1156481  | 0.4302698  |
| C    | -1.8581381 | 10.039759 | -2.881101  | O    | 2.9485179  | -2.4314258 | -2.1975939 |
| C    | -2.9007818 | 10.671339 | -1.9725154 | C    | -0.186284  | 14.699965  | 4.7248348  |
| C    | -4.2165187 | 10.462609 | -2.216944  | O    | -0.2698809 | 12.252575  | 8.8838481  |
| C    | -4.8274533 | 9.6790138 | -3.3370492 | O    | -2.0831835 | 10.061744  | 5.0990267  |
| C    | -3.8045428 | 8.9278935 | -4.2028579 | H    | 2.7261016  | 7.6214625  | -2.4017136 |
| C    | -2.452697  | 9.6678599 | -4.2775198 | H    | 0.8000919  | 9.2507656  | -2.8670695 |
| C    | -2.4799368 | 11.495296 | -0.8388784 | H    | -2.3411743 | 6.3224296  | -0.5227136 |
| C    | -3.5737108 | 12.045935 | -0.0507977 | H    | -1.0753815 | 10.780019  | -3.0691121 |
| C    | -4.8545509 | 11.774321 | -0.3814817 | H    | -5.3955086 | 10.378228  | -3.9615414 |
| O    | -5.2050974 | 11.012356 | -1.4354323 | H    | -5.5437662 | 8.9649283  | -2.9175596 |
| C    | -1.1757225 | 11.738079 | -0.5071066 | H    | -4.1970818 | 8.8974381  | -5.2271492 |
| C    | -0.7877956 | 12.539056 | 0.6402951  | H    | -1.7193521 | 9.0334872  | -4.7866685 |
| C    | -1.8798819 | 13.381956 | 1.351049   | H    | -5.7079939 | 12.143649  | 0.1732382  |
| C    | -3.3265286 | 12.899987 | 1.1410424  | H    | -0.3525559 | 11.285051  | -1.0464113 |
| O    | -1.5854618 | 13.461909 | 2.7543895  | H    | -1.997493  | 14.867209  | -0.2383811 |
| C    | -1.6459682 | 12.293769 | 3.4248748  | H    | -2.5047995 | 15.451335  | 1.3671768  |
| C    | -1.2411    | 12.333699 | 4.8279286  | H    | -0.7688211 | 15.198085  | 1.0050154  |
| C    | -1.7826122 | 14.82654  | 0.8345774  | H    | 1.9178068  | 6.3847553  | 1.2980727  |
| O    | 1.8947565  | 3.5546508 | -0.4582834 | H    | 1.4966299  | 4.7288005  | 1.8134203  |
| C    | 1.5560944  | 3.0238258 | -1.6552262 | H    | 3.1392894  | 5.0923905  | 1.2065764  |
| C    | 1.9279076  | 1.5926425 | -1.7931603 | H    | -1.629021  | 12.385354  | -5.8004343 |
| C    | 2.0754518  | 5.3198323 | 1.0985979  | H    | -2.6433578 | 5.9215815  | -4.1164699 |
| O    | -0.6952128 | 4.4539987 | 0.0109202  | H    | 1.9509411  | -1.3843124 | -0.0809054 |
| O    | 3.6563472  | 5.3356279 | -1.5733026 | H    | 3.2327754  | -0.5641506 | -4.0943219 |
| O    | -4.2261316 | 13.285556 | 1.8659894  | H    | 0.2111091  | 14.191968  | 7.3087336  |
| O    | 0.3715489  | 12.640455 | 1.0219654  | H    | -1.4443087 | 10.22668   | 7.5285875  |

|                                                               |            |            |            |   |            |              |            |
|---------------------------------------------------------------|------------|------------|------------|---|------------|--------------|------------|
| C                                                             | -2.6029078 | 10.911561  | -5.1546353 | H | 3.260485   | 1.5469117    | -4.9738061 |
| C                                                             | -3.6933464 | 7.4576161  | -3.8009125 | H | 1.7318821  | 2.3864184    | -4.6260844 |
| O                                                             | -3.5956807 | 11.221619  | -5.7750928 | H | 3.2205239  | 2.9607066    | -3.8994694 |
| O                                                             | -1.458787  | 11.631571  | -5.2039048 | H | 1.1077302  | 0.3615512    | 1.0314359  |
| O                                                             | -2.6236396 | 6.8620461  | -4.3788266 | H | 3.3055822  | -2.6022366   | -3.0832582 |
| O                                                             | -4.488886  | 6.8575127  | -3.115917  | H | 0.4115672  | 15.335495    | 5.3843263  |
| O                                                             | 1.0343104  | 3.6961105  | -2.5305671 | H | 0.4010671  | 14.469724    | 3.8313622  |
| O                                                             | -2.0528982 | 11.276225  | 2.8431066  | H | -1.0574494 | 15.272414    | 4.3915517  |
| C                                                             | 1.7537869  | 0.6714781  | -0.7346414 | H | -0.5292039 | 11.411672    | 9.293093   |
| C                                                             | 2.0937463  | -0.6727783 | -0.8897189 | H | -2.2004943 | 10.213618    | 4.1269351  |
| <b>NImag</b>                                                  |            |            |            |   |            | 0            |            |
| <b><math>\Sigma</math> Electronic and thermal Free Energy</b> |            |            |            |   |            | -1865691.142 |            |
| <b>mol Fraction</b>                                           |            |            |            |   |            | 3.90E-09     |            |

**(8S, 13S, 8aS, 12aS, 13aS)-Diazaphilonic acid (2) - Conformer 31**

| Atom | X          | Y         | Z          | Atom | X          | Y          | Z          |
|------|------------|-----------|------------|------|------------|------------|------------|
| C    | 1.9279501  | 7.0441764 | -1.8417205 | C    | 2.5767755  | -1.0262484 | -2.2169287 |
| C    | 0.6051109  | 7.3618168 | -1.7295366 | C    | 3.1785245  | -0.3539048 | -1.1411181 |
| C    | -0.3379019 | 6.5206765 | -1.0038999 | C    | 2.8981031  | 0.9792886  | -0.8800429 |
| C    | 0.1021424  | 5.2643514 | -0.3422784 | C    | -1.8648852 | 11.490038  | 5.7794803  |
| C    | 1.6235384  | 5.0400548 | -0.2506845 | C    | -1.5153298 | 11.59352   | 7.1256244  |
| C    | 2.4895482  | 5.8352923 | -1.2691321 | C    | -0.5690143 | 12.529992  | 7.5522888  |
| C    | 0.0040477  | 8.532314  | -2.3393427 | C    | 0.0341749  | 13.384158  | 6.6339963  |
| C    | -1.3141013 | 8.7946973 | -2.2292296 | C    | -0.3154512 | 13.306747  | 5.2852305  |
| O    | -2.1543952 | 7.9751408 | -1.5133853 | C    | 3.6221121  | 1.6264422  | 0.2798414  |
| C    | -1.64292   | 6.8651193 | -0.936415  | O    | 0.5757584  | 1.567536   | -3.7139884 |
| C    | -2.0468501 | 9.9483221 | -2.8807718 | O    | 2.9070081  | -2.3349499 | -2.384835  |
| C    | -3.0663733 | 10.583184 | -1.9485011 | C    | -2.892634  | 10.449787  | 5.3939614  |
| C    | -4.3875157 | 10.367817 | -2.1514909 | O    | -0.1973384 | 12.652752  | 8.8569616  |
| C    | -5.0277645 | 9.5756813 | -3.2492165 | O    | 0.2859471  | 14.121809  | 4.3805412  |
| C    | -4.0279247 | 8.8043806 | -4.1231118 | H    | 2.6053376  | 7.6642054  | -2.4212043 |
| C    | -2.6786507 | 9.5423919 | -4.2509549 | H    | 0.6275688  | 9.2138422  | -2.9094748 |
| C    | -2.6143691 | 11.415793 | -0.8321122 | H    | -2.3949592 | 6.2833856  | -0.4183663 |
| C    | -3.685633  | 11.953345 | -0.0049736 | H    | -1.279616  | 10.694359  | -3.106448  |
| C    | -4.974066  | 11.675923 | -0.2957298 | H    | -5.6013913 | 10.270665  | -3.8734415 |
| O    | -5.3549117 | 10.916503 | -1.3433343 | H    | -5.7420046 | 8.8741879  | -2.8060652 |
| C    | -1.305128  | 11.677103 | -0.5451671 | H    | -4.4463255 | 8.748913   | -5.1360725 |
| C    | -0.8841935 | 12.486175 | 0.5896172  | H    | -1.9591905 | 8.8963265  | -4.7654411 |
| C    | -1.960431  | 13.314046 | 1.3425965  | H    | -5.8116708 | 12.036755  | 0.2877871  |
| C    | -3.4022524 | 12.796543 | 1.1876468  | H    | -0.4933233 | 11.240151  | -1.114303  |
| O    | -1.6311403 | 13.41691  | 2.731862   | H    | -2.1474873 | 14.788515  | -0.2565983 |
| C    | -1.6420545 | 12.240502 | 3.4020166  | H    | -2.6282634 | 15.37006   | 1.3601224  |
| C    | -1.2707375 | 12.36256  | 4.8320975  | H    | -0.8983594 | 15.146283  | 0.9627063  |
| C    | -1.908307  | 14.756612 | 0.8116458  | H    | 1.8812324  | 6.492528   | 1.3524198  |
| O    | 1.9193032  | 3.6386022 | -0.3707784 | H    | 1.5231522  | 4.8345529  | 1.8991489  |
| C    | 1.5707349  | 3.0690461 | -1.5397226 | H    | 3.1464438  | 5.2454584  | 1.2628454  |
| C    | 1.9793484  | 1.6778898 | -1.7246398 | H    | -1.9003033 | 12.225631  | -5.856946  |
| C    | 2.0735199  | 5.4309139 | 1.1662427  | H    | -2.8773726 | 5.7969178  | -4.0133335 |
| O    | -0.6796645 | 4.4897132 | 0.1788647  | H    | 1.2405375  | -0.8550049 | -3.9183896 |
| O    | 3.6313102  | 5.4510347 | -1.4893771 | H    | 3.8786156  | -0.9018686 | -0.5197824 |
| O    | -4.2796959 | 13.139256 | 1.9608166  | H    | -1.9864657 | 10.935322  | 7.852601   |
| O    | 0.2900683  | 12.603271 | 0.9116825  | H    | 0.7725441  | 14.102685  | 6.9795884  |

|                                                               |            |            |            |   |            |              |            |
|---------------------------------------------------------------|------------|------------|------------|---|------------|--------------|------------|
| C                                                             | -2.8533505 | 10.76414   | -5.1544832 | H | 4.3776307  | 0.940022     | 0.6726751  |
| C                                                             | -3.9038472 | 7.3449626  | -3.6892192 | H | 4.1135297  | 2.5554349    | -0.0229514 |
| O                                                             | -3.8608348 | 11.05471   | -5.7603585 | H | 2.9344413  | 1.8829664    | 1.0916669  |
| O                                                             | -1.7135916 | 11.486582  | -5.2470759 | H | 0.5106581  | 2.5230128    | -3.4581079 |
| O                                                             | -2.8575435 | 6.7320853  | -4.2933381 | H | 2.4363183  | -2.6838565   | -3.1584448 |
| O                                                             | -4.6720999 | 6.7619585  | -2.9598497 | H | -3.347156  | 10.019194    | 6.2914997  |
| O                                                             | 0.9168377  | 3.7205876  | -2.3699371 | H | -3.6857901 | 10.872523    | 4.7704228  |
| O                                                             | -1.9763541 | 11.201945  | 2.8522629  | H | -2.4388938 | 9.6449731    | 4.8088648  |
| C                                                             | 1.4112733  | 0.9849156  | -2.8389547 | H | -0.6853215 | 12.001906    | 9.3856368  |
| C                                                             | 1.7018029  | -0.3636278 | -3.0662988 | H | 0.9624474  | 14.644343    | 4.8392845  |
| <b>NImag</b>                                                  |            |            |            |   |            | 0            |            |
| <b><math>\Sigma</math> Electronic and thermal Free Energy</b> |            |            |            |   |            | -1865690.935 |            |
| <b>mol Fraction</b>                                           |            |            |            |   |            | 2.75E-09     |            |

**(8S, 13S, 8aS, 12aS, 13aS)-Diazaphilonic acid (2) - Conformer 32**

| Atom | X          | Y         | Z          | Atom | X          | Y          | Z          |
|------|------------|-----------|------------|------|------------|------------|------------|
| C    | 2.8490133  | 7.0715859 | -1.8475853 | C    | 1.2723817  | -0.2798459 | -4.1484097 |
| C    | 1.6167159  | 7.369654  | -1.3341061 | C    | 2.5429652  | 0.1203684  | -3.7249343 |
| C    | 0.9533621  | 6.5169366 | -0.3606688 | C    | 2.7312221  | 1.3248948  | -3.052216  |
| C    | 1.5840963  | 5.2649777 | 0.1188569  | C    | -1.9218966 | 12.394972  | 6.1819449  |
| C    | 2.9042717  | 4.8243465 | -0.5597113 | C    | -1.3691796 | 12.914441  | 7.3446348  |
| C    | 3.4825666  | 5.7893491 | -1.6352467 | C    | -0.4882516 | 14.004594  | 7.2859146  |
| C    | 0.8042259  | 8.4695044 | -1.8072837 | C    | -0.1431968 | 14.575417  | 6.0669514  |
| C    | -0.4946007 | 8.5803677 | -1.4577257 | C    | -0.6926138 | 14.075191  | 4.8799463  |
| O    | -1.0512613 | 7.7861205 | -0.4873073 | C    | 4.1420102  | 1.6786955  | -2.6339438 |
| C    | -0.3119311 | 6.7817654 | 0.0301187  | O    | -0.7337617 | 2.5691618  | -3.0404365 |
| C    | -1.5290132 | 9.4118202 | -2.1891428 | O    | 1.1774693  | -1.4769392 | -4.7865588 |
| C    | -2.7353438 | 9.7457515 | -1.3325323 | C    | -2.8655701 | 11.217859  | 6.2818116  |
| C    | -3.8661156 | 9.0102455 | -1.4718626 | O    | 0.0146778  | 14.456838  | 8.4696025  |
| C    | -4.1046741 | 7.8613636 | -2.4028525 | O    | -0.2503413 | 14.661489  | 3.7491696  |
| C    | -2.8955793 | 7.4888579 | -3.279834  | H    | 3.3167884  | 7.7197044  | -2.5827368 |
| C    | -1.9587501 | 8.692822  | -3.511641  | H    | 1.1942001  | 9.1236592  | -2.5811593 |
| C    | -2.668538  | 10.825483 | -0.3548153 | H    | -0.8633874 | 6.1835521  | 0.743262   |
| C    | -3.900094  | 11.053832 | 0.3840114  | H    | -1.0402458 | 10.343652  | -2.4878997 |
| C    | -4.9784609 | 10.270641 | 0.1609961  | H    | -4.959857  | 8.1245264  | -3.0355835 |
| O    | -4.9961981 | 9.2669228 | -0.7356433 | H    | -4.3973772 | 6.9879027  | -1.8091752 |
| C    | -1.5381501 | 11.564058 | -0.1086667 | H    | -3.2779892 | 7.2062413  | -4.2680225 |
| C    | -1.4974069 | 12.582229 | 0.910848   | H    | -1.0478663 | 8.3457017  | -4.0097373 |
| C    | -2.82852   | 13.104149 | 1.4988677  | H    | -5.9174685 | 10.381535  | 0.6886967  |
| C    | -4.0137294 | 12.127932 | 1.409392   | H    | -0.5938714 | 11.345852  | -0.5938786 |
| O    | -2.5812282 | 13.504818 | 2.8477877  | H    | -3.4167679 | 14.182901  | -0.3060525 |
| C    | -2.2276443 | 12.482822 | 3.6958185  | H    | -4.1298096 | 14.799353  | 1.2078712  |
| C    | -1.6136864 | 12.995214 | 4.9311704  | H    | -2.4117194 | 15.117097  | 0.8289738  |
| C    | -3.2245449 | 14.390109 | 0.7517006  | H    | 4.2018259  | 5.5044624  | 1.0355956  |
| O    | 2.6762343  | 3.5237242 | -1.180293  | H    | 3.5875706  | 3.8465496  | 1.2336602  |
| C    | 1.7138358  | 3.4730847 | -2.1242656 | H    | 4.8744205  | 4.2013509  | 0.0309258  |
| C    | 1.6119396  | 2.169008  | -2.8095217 | H    | -2.3165696 | 11.34243   | -5.3068815 |
| C    | 3.966091   | 4.5725346 | 0.5104759  | H    | -0.5597586 | 5.2190644  | -3.0726908 |
| O    | 1.0958626  | 4.5777943 | 0.9986617  | H    | -0.8256249 | 0.2353931  | -4.2573799 |
| O    | 4.4601369  | 5.4116018 | -2.2771215 | H    | 3.3849986  | -0.5302297 | -3.9350653 |
| O    | -5.0271246 | 12.304481 | 2.0599865  | H    | -1.6098844 | 12.489734  | 8.3134079  |
| O    | -0.4493363 | 13.102526 | 1.3038823  | H    | 0.5683427  | 15.393973  | 5.9993506  |

|                                                               |            |           |            |   |            |              |            |
|---------------------------------------------------------------|------------|-----------|------------|---|------------|--------------|------------|
| C                                                             | -2.6150004 | 9.6827213 | -4.473152  | H | 4.8557654  | 1.0456682    | -3.1689739 |
| C                                                             | -2.1800971 | 6.2240662 | -2.771981  | H | 4.3882418  | 2.7264559    | -2.8230739 |
| O                                                             | -3.6747389 | 9.5249844 | -5.0376357 | H | 4.2810426  | 1.5147557    | -1.5599286 |
| O                                                             | -1.8425432 | 10.777333 | -4.6674397 | H | -1.5454876 | 2.1054665    | -3.2991941 |
| O                                                             | -1.030842  | 6.0149237 | -3.4266092 | H | 0.2537883  | -1.6416741   | -5.0330625 |
| O                                                             | -2.6335667 | 5.4817917 | -1.9262103 | H | -3.0776921 | 10.989899    | 7.3303041  |
| O                                                             | 1.0016206  | 4.4458844 | -2.3453322 | H | -3.8158791 | 11.412337    | 5.772951   |
| O                                                             | -2.4253685 | 11.320101 | 3.3906161  | H | -2.4377981 | 10.328504    | 5.8091748  |
| C                                                             | 0.3362359  | 1.7595139 | -3.2696404 | H | 0.6042226  | 15.207123    | 8.293932   |
| C                                                             | 0.1656462  | 0.5376195 | -3.9221356 | H | -0.5284907 | 14.177624    | 2.9405524  |
| <b>NImag</b>                                                  |            |           |            |   |            | 0            |            |
| <b><math>\Sigma</math> Electronic and thermal Free Energy</b> |            |           |            |   |            | -1865689.228 |            |
| <b>mol Fraction</b>                                           |            |           |            |   |            | 1.54E-10     |            |



**(8S, 13S, 8aS, 12aS, 13aS)-Diazaphilonic acid (2) - Conformer 33**

| Atom | X          | Y         | Z          | Atom | X          | Y          | Z          |
|------|------------|-----------|------------|------|------------|------------|------------|
| C    | 1.9897681  | 7.1608957 | -1.6324451 | C    | 2.5858054  | -0.8846942 | -2.1614809 |
| C    | 0.6653233  | 7.4855288 | -1.5760817 | C    | 3.1678527  | -0.2324709 | -1.0611729 |
| C    | -0.3132559 | 6.6455742 | -0.8977055 | C    | 2.8852583  | 1.0971147  | -0.7757307 |
| C    | 0.0895299  | 5.3804236 | -0.2281082 | C    | -2.1400444 | 11.246861  | 5.9364598  |
| C    | 1.6038043  | 5.1375247 | -0.0812508 | C    | -1.5689575 | 11.266152  | 7.2015026  |
| C    | 2.5180443  | 5.9420553 | -1.0488073 | C    | -0.3602221 | 11.942615  | 7.4243535  |
| C    | 0.0979081  | 8.6636817 | -2.2035973 | C    | 0.2928964  | 12.593214  | 6.3846392  |
| C    | -1.222871  | 8.9313762 | -2.1520264 | C    | -0.265787  | 12.595418  | 5.1006316  |
| O    | -2.0980021 | 8.1142524 | -1.4762983 | C    | 3.5890308  | 1.7189198  | 0.4102319  |
| C    | -1.6172952 | 6.9987449 | -0.8817339 | O    | 0.6240071  | 1.7436871  | -3.6435093 |
| C    | -1.9198662 | 10.086974 | -2.8382731 | O    | 2.848899   | -2.1894757 | -2.4411187 |
| C    | -3.025965  | 10.688732 | -1.9830417 | C    | -3.4423223 | 10.506322  | 5.7320261  |
| C    | -4.3230551 | 10.520996 | -2.3365385 | O    | 0.1382407  | 11.914515  | 8.6926092  |
| C    | -4.8526292 | 9.8047635 | -3.5416053 | O    | 0.4741274  | 13.205089  | 4.1524041  |
| C    | -3.7850311 | 8.9906383 | -4.2811085 | H    | 2.6959179  | 7.7814417  | -2.1759643 |
| C    | -2.4128287 | 9.7081199 | -4.2635009 | H    | 0.7496837  | 9.3454408  | -2.7411995 |
| C    | -2.6857101 | 11.459296 | -0.7881142 | H    | -2.3934365 | 6.4208239  | -0.395887  |
| C    | -3.8269988 | 11.985215 | -0.055104  | H    | -1.1611465 | 10.861865  | -2.9875825 |
| C    | -5.0824305 | 11.754985 | -0.4961624 | H    | -5.2914134 | 10.550805  | -4.2178809 |
| O    | -5.3596534 | 11.053095 | -1.6115829 | H    | -5.6675076 | 9.1447373  | -3.2284063 |
| C    | -1.4022573 | 11.669026 | -0.3530957 | H    | -4.0850477 | 8.8980035  | -5.3312173 |
| C    | -1.1128325 | 12.373391 | 0.8723698  | H    | -1.6745256 | 9.0382651  | -4.7193378 |
| C    | -2.2264583 | 13.214718 | 1.5344846  | H    | -5.970549  | 12.113439  | 0.0088533  |
| C    | -3.6622673 | 12.785984 | 1.1908215  | H    | -0.5480163 | 11.228592  | -0.8516904 |
| O    | -2.0002069 | 13.202821 | 2.9453661  | H    | -2.1954551 | 14.785141  | 0.0175831  |
| C    | -2.1239123 | 11.968322 | 3.5362568  | H    | -2.8048421 | 15.290673  | 1.6158284  |
| C    | -1.5072763 | 11.944359 | 4.8718357  | H    | -1.0550565 | 15.023798  | 1.3638422  |
| C    | -2.0588532 | 14.681313 | 1.0988804  | H    | 1.8140936  | 6.5513597  | 1.5625801  |
| O    | 1.8887545  | 3.7353891 | -0.222363  | H    | 1.4163263  | 4.8866247  | 2.0574855  |
| C    | 1.5765181  | 3.197628  | -1.4170512 | H    | 3.0682293  | 5.2920594  | 1.4947518  |
| C    | 1.9853857  | 1.8097315 | -1.6237165 | H    | -2.9799241 | 11.584548  | -6.8259768 |
| C    | 2.0020333  | 5.4918973 | 1.3602213  | H    | -2.7224922 | 5.9649531  | -3.9622116 |
| O    | -0.7197325 | 4.6110501 | 0.2572702  | H    | 1.2948374  | -0.6957862 | -3.8775926 |
| O    | 3.6661128  | 5.5533652 | -1.2241576 | H    | 3.8614578  | -0.7780609 | -0.4246657 |
| O    | -4.6122685 | 13.184225 | 1.8388157  | H    | -2.0468324 | 10.763509  | 8.0356513  |
| O    | 0.0037364  | 12.376659 | 1.3974493  | H    | 1.2494123  | 13.087935  | 6.530131   |

|                                                               |            |            |            |   |            |              |            |
|---------------------------------------------------------------|------------|------------|------------|---|------------|--------------|------------|
| C                                                             | -2.4144873 | 10.961637  | -5.1446906 | H | 4.3437024  | 1.0281903    | 0.7981088  |
| C                                                             | -3.7376343 | 7.5455201  | -3.7826994 | H | 4.0790448  | 2.6579161    | 0.1380765  |
| O                                                             | -1.8614316 | 12.004828  | -4.8808312 | H | 2.8883454  | 1.9509993    | 1.2182266  |
| O                                                             | -3.0748603 | 10.761703  | -6.3090045 | H | 0.5610666  | 2.6940398    | -3.3734227 |
| O                                                             | -2.6609819 | 6.8886606  | -4.272873  | H | 3.4619256  | -2.5383431   | -1.7748716 |
| O                                                             | -4.5819392 | 7.0141114  | -3.1001964 | H | -3.8331403 | 10.154909    | 6.6911927  |
| O                                                             | 0.9534656  | 3.873783   | -2.2507416 | H | -4.2025381 | 11.139571    | 5.2620725  |
| O                                                             | -2.6835881 | 11.052544  | 2.9591146  | H | -3.3064493 | 9.6442365    | 5.0719312  |
| C                                                             | 1.4394486  | 1.1374532  | -2.7653187 | H | 0.9680628  | 12.416781    | 8.7154235  |
| C                                                             | 1.7290855  | -0.2052091 | -3.0147282 | H | 0.1307555  | 13.044215    | 3.2464586  |
| <b>NImag</b>                                                  |            |            |            |   |            | 0            |            |
| <b><math>\Sigma</math> Electronic and thermal Free Energy</b> |            |            |            |   |            | -1865698.101 |            |
| <b>mol Fraction</b>                                           |            |            |            |   |            | 0.000497603  |            |

**(8S, 13S, 8aS, 12aS, 13aS)-Diazaphilonic acid (2) - Conformer 34**

| Atom | X          | Y         | Z          | Atom | X          | Y          | Z          |
|------|------------|-----------|------------|------|------------|------------|------------|
| C    | 1.7090295  | 6.7161338 | -1.7722772 | C    | 2.5444866  | -1.0649301 | -2.2308151 |
| C    | 0.4196815  | 7.1601591 | -1.6451082 | C    | 1.2114141  | -0.784899  | -2.5668303 |
| C    | -0.5896935 | 6.4194325 | -0.9028332 | C    | 0.6889951  | 0.4852338  | -2.3657926 |
| C    | -0.2637016 | 5.1385083 | -0.2169452 | C    | -1.9942524 | 11.546277  | 5.7792217  |
| C    | 1.2262231  | 4.7531918 | -0.1792241 | C    | -1.6826997 | 11.633564  | 7.1357122  |
| C    | 2.1278295  | 5.4494412 | -1.2282136 | C    | -0.6939734 | 12.51091   | 7.5910211  |
| C    | -0.0718328 | 8.3706991 | -2.2689037 | C    | -0.0091087 | 13.321785  | 6.6909648  |
| C    | -1.3631841 | 8.7499309 | -2.1649921 | C    | -0.318755  | 13.260603  | 5.3316881  |
| O    | -2.2675677 | 8.0232715 | -1.4330757 | C    | -0.751599  | 0.7504297  | -2.7411501 |
| C    | -1.8573761 | 6.8837757 | -0.8353316 | O    | 3.7582915  | 2.1064241  | -1.0238563 |
| C    | -1.9950413 | 9.9423633 | -2.8520826 | O    | 2.985195   | -2.3344552 | -2.4593009 |
| C    | -3.0000692 | 10.654912 | -1.9623416 | C    | -3.0722017 | 10.570399  | 5.3636437  |
| C    | -4.3253153 | 10.519406 | -2.2040946 | O    | -0.3578854 | 12.615838  | 8.9066572  |
| C    | -4.9795806 | 9.7473376 | -3.3081136 | O    | 0.3619592  | 14.032859  | 4.4458785  |
| C    | -4.0019472 | 8.9007729 | -4.1367971 | H    | 2.4304024  | 7.2572966  | -2.3766814 |
| C    | -2.6087617 | 9.5564894 | -4.2361858 | H    | 0.6078592  | 8.9822275  | -2.8539012 |
| C    | -2.5299763 | 11.471884 | -0.8424401 | H    | -2.6560142 | 6.3826386  | -0.3031364 |
| C    | -3.5892224 | 12.089955 | -0.0575089 | H    | -1.1732936 | 10.632817  | -3.0625313 |
| C    | -4.8831427 | 11.891933 | -0.3864231 | H    | -5.4907201 | 10.463588  | -3.9617944 |
| O    | -5.2795829 | 11.141693 | -1.4352808 | H    | -5.7480922 | 9.0984627  | -2.8756725 |
| C    | -1.216084  | 11.649148 | -0.5156782 | H    | -4.3931366 | 8.848319   | -5.1607068 |
| C    | -0.7785666 | 12.441934 | 0.6244597  | H    | -1.9149451 | 8.8618036  | -4.7216724 |
| C    | -1.8203165 | 13.348383 | 1.3341835  | H    | -5.7135787 | 12.315002  | 0.1646122  |
| C    | -3.288684  | 12.929983 | 1.1333315  | H    | -0.4171618 | 11.152765  | -1.0538246 |
| O    | -1.5322497 | 13.439154 | 2.733501   | H    | -1.8498204 | 14.81918   | -0.2789223 |
| C    | -1.6478067 | 12.271154 | 3.4086359  | H    | -2.3446815 | 15.445384  | 1.3166742  |
| C    | -1.3161674 | 12.375937 | 4.8494596  | H    | -0.6216838 | 15.099905  | 0.9812232  |
| C    | -1.6503157 | 14.779471 | 0.7972027  | H    | 1.6868082  | 6.1597734  | 1.4251289  |
| O    | 1.3979911  | 3.3414826 | -0.3346978 | H    | 1.1710546  | 4.5408757  | 1.966037   |
| C    | 0.9489729  | 2.8332539 | -1.5274565 | H    | 2.8094168  | 4.7842316  | 1.2921039  |
| C    | 1.5045328  | 1.4958533 | -1.7879316 | H    | -1.625829  | 12.16882   | -5.8467918 |
| C    | 1.7608939  | 5.0861124 | 1.2245229  | H    | -3.0153343 | 5.8386572  | -3.9208994 |
| O    | -1.1008529 | 4.4818204 | 0.3734079  | H    | 4.4127869  | -0.265416  | -1.475098  |
| O    | 3.1948112  | 4.9032061 | -1.5223715 | H    | 0.6000862  | -1.579268  | -2.9816892 |
| O    | -4.1663833 | 13.344806 | 1.8698732  | H    | -2.2173376 | 11.009142  | 7.8483903  |
| O    | 0.3899735  | 12.483406 | 0.9836592  | H    | 0.7611881  | 13.994222  | 7.0588911  |

|                                                               |            |            |            |   |            |              |            |
|---------------------------------------------------------------|------------|------------|------------|---|------------|--------------|------------|
| C                                                             | -2.6841189 | 10.77409   | -5.1587609 | H | -1.2440589 | -0.1808688   | -3.0352736 |
| C                                                             | -3.9740677 | 7.4459593  | -3.6695672 | H | -1.3153634 | 1.1905387    | -1.9115599 |
| O                                                             | -3.6533665 | 11.112531  | -5.800772  | H | -0.8176954 | 1.459258     | -3.5722838 |
| O                                                             | -1.5022578 | 11.428774  | -5.2221915 | H | 3.4153003  | 3.0274779    | -1.0377376 |
| O                                                             | -2.9405376 | 6.7653259  | -4.2200541 | H | 3.9132988  | -2.3989415   | -2.18385   |
| O                                                             | -4.7981863 | 6.9232503  | -2.9556967 | H | -3.580832  | 10.173056    | 6.2473593  |
| O                                                             | 0.186877   | 3.4711377  | -2.2344497 | H | -3.817297  | 11.038878    | 4.714089   |
| O                                                             | -2.0357837 | 11.255022  | 2.8517949  | H | -2.6513763 | 9.7361678    | 4.7954172  |
| C                                                             | 2.8631084  | 1.2109104  | -1.4844546 | H | -0.9020067 | 11.99869     | 9.4207774  |
| C                                                             | 3.3673686  | -0.0772214 | -1.704298  | H | 1.0537863  | 14.514453    | 4.9261047  |
| <b>NImag</b>                                                  |            |            |            |   |            | 0            |            |
| <b><math>\Sigma</math> Electronic and thermal Free Energy</b> |            |            |            |   |            | -1865688.704 |            |
| <b>mol Fraction</b>                                           |            |            |            |   |            | 6.33E-11     |            |

**(8S, 13S, 8aS, 12aS, 13aS)-Diazaphilonic acid (2) - Conformer 35**

| Atom | X          | Y         | Z          | Atom | X          | Y          | Z          |
|------|------------|-----------|------------|------|------------|------------|------------|
| C    | 2.0050366  | 7.1681471 | -1.6463412 | C    | 2.9627743  | -0.9081166 | -2.0644641 |
| C    | 0.676197   | 7.4692835 | -1.5966227 | C    | 3.159531   | 0.0241714  | -3.0875645 |
| C    | -0.2979168 | 6.5727694 | -0.9874123 | C    | 2.7452154  | 1.3481533  | -2.9380862 |
| C    | 0.1189575  | 5.2768717 | -0.3850117 | C    | -1.2360129 | 13.292833  | 5.6799292  |
| C    | 1.6331674  | 5.0651858 | -0.1978008 | C    | -0.9936532 | 13.19496   | 7.0418975  |
| C    | 2.5424168  | 5.9206499 | -1.1274484 | C    | -1.2969989 | 12.021832  | 7.7519503  |
| C    | 0.0962659  | 8.6672746 | -2.1746393 | C    | -1.8274985 | 10.917204  | 7.101156   |
| C    | -1.230922  | 8.9012297 | -2.1413534 | C    | -2.0696205 | 10.978947  | 5.725265   |
| O    | -2.1027245 | 8.032739  | -1.5279591 | C    | 2.9901181  | 2.3127947  | -4.076668  |
| C    | -1.6095311 | 6.8946544 | -0.9854311 | O    | 1.3336731  | 1.1903753  | 0.4455814  |
| C    | -1.942104  | 10.066855 | -2.795398  | O    | 3.3463288  | -2.2112981 | -2.1779151 |
| C    | -3.0541668 | 10.630701 | -1.9253748 | C    | -0.8455478 | 14.585337  | 4.9976983  |
| C    | -4.3462138 | 10.375028 | -2.2411491 | O    | -1.0321536 | 12.026582  | 9.0857721  |
| C    | -4.8673658 | 9.5974209 | -3.4097626 | O    | -2.5631164 | 9.8657878  | 5.1615056  |
| C    | -3.7720861 | 8.9120823 | -4.2408891 | H    | 2.7107214  | 7.8259664  | -2.1450657 |
| C    | -2.4505819 | 9.7084469 | -4.228825  | H    | 0.7430797  | 9.3871125  | -2.6666265 |
| C    | -2.7250799 | 11.440465 | -0.7518646 | H    | -2.383918  | 6.2711617  | -0.5567846 |
| C    | -3.8787686 | 11.924578 | -0.0067115 | H    | -1.1829523 | 10.843304  | -2.9252362 |
| C    | -5.1290764 | 11.609849 | -0.4084072 | H    | -5.432658  | 10.289343  | -4.0447934 |
| O    | -5.3945759 | 10.862784 | -1.4972988 | H    | -5.5729183 | 8.8437674  | -3.044809  |
| C    | -1.4502858 | 11.727394 | -0.3486622 | H    | -4.1117183 | 8.8929246  | -5.2841812 |
| C    | -1.1537756 | 12.512504 | 0.8363447  | H    | -1.6668761 | 9.1183829  | -4.7157388 |
| C    | -2.3142779 | 13.290653 | 1.5116212  | H    | -6.0237477 | 11.928973  | 0.1114054  |
| C    | -3.727129  | 12.755705 | 1.2168924  | H    | -0.5830532 | 11.32305   | -0.8566956 |
| O    | -2.0932763 | 13.344865 | 2.929613   | H    | -2.4157202 | 14.812014  | -0.0444152 |
| C    | -2.137607  | 12.157659 | 3.5670507  | H    | -3.0259998 | 15.331545  | 1.5474405  |
| C    | -1.8044658 | 12.176442 | 4.9892769  | H    | -1.2650961 | 15.159353  | 1.2672831  |
| C    | -2.2526326 | 14.751351 | 1.0366934  | H    | 1.7733657  | 6.4587619  | 1.4777012  |
| O    | 1.9566     | 3.6781116 | -0.3469117 | H    | 1.3974566  | 4.7737659  | 1.9300731  |
| C    | 1.7003125  | 3.1661146 | -1.5721971 | H    | 3.0513072  | 5.2203534  | 1.4161367  |
| C    | 2.1384448  | 1.7555075 | -1.726418  | H    | -1.6680464 | 12.497186  | -5.6406204 |
| C    | 1.9854611  | 5.4068976 | 1.2602098  | H    | -2.4908302 | 5.9545643  | -4.1697841 |
| O    | -0.6890484 | 4.4578904 | 0.0128187  | H    | 2.2021677  | -1.2627375 | -0.0891155 |
| O    | 3.6944555  | 5.5587933 | -1.3272613 | H    | 3.6451232  | -0.2839337 | -4.0112395 |
| O    | -4.6769805 | 13.084578 | 1.9047341  | H    | -0.5553514 | 14.02516   | 7.5851164  |
| O    | -0.0200337 | 12.650992 | 1.2785127  | H    | -2.052478  | 9.9916194  | 7.6235432  |

|                                                               |            |            |            |   |            |             |            |
|---------------------------------------------------------------|------------|------------|------------|---|------------|-------------|------------|
| C                                                             | -2.609525  | 10.967922  | -5.0815679 | H | 3.6273967  | 1.84923     | -4.8358586 |
| C                                                             | -3.6189898 | 7.4374169  | -3.8700473 | H | 2.0494176  | 2.6159367   | -4.5452893 |
| O                                                             | -3.5824502 | 11.253377  | -5.7438672 | H | 3.4747286  | 3.2310376   | -3.7304529 |
| O                                                             | -1.4959273 | 11.735397  | -5.0549028 | H | 1.2323208  | 0.4168721   | 1.0219734  |
| O                                                             | -2.4978415 | 6.9016949  | -4.4076567 | H | 3.7535864  | -2.34366    | -3.0483703 |
| O                                                             | -4.4213849 | 6.7872518  | -3.2410233 | H | -0.307838  | 15.226657   | 5.7018507  |
| O                                                             | 1.1946732  | 3.8397157  | -2.455962  | H | -0.2059051 | 14.402896   | 4.1294529  |
| O                                                             | -2.472208  | 11.140339  | 2.9405123  | H | -1.722358  | 15.130847   | 4.6352962  |
| C                                                             | 1.9511782  | 0.8000345  | -0.7010712 | H | -1.2760139 | 11.165254   | 9.4605945  |
| C                                                             | 2.3546814  | -0.5245982 | -0.8718948 | H | -2.6384927 | 10.038651   | 4.1887722  |
| <b>NImag</b>                                                  |            |            |            |   |            | 0           |            |
| <b><math>\Sigma</math> Electronic and thermal Free Energy</b> |            |            |            |   |            | -1865691.14 |            |
| <b>mol Fraction</b>                                           |            |            |            |   |            | 3.88E-09    |            |

**(8S, 13S, 8aS, 12aS, 13aS)-Diazaphilonic acid (2) - Conformer 36**

| Atom | X          | Y         | Z          | Atom | X          | Y          | Z          |
|------|------------|-----------|------------|------|------------|------------|------------|
| C    | 2.8762222  | 6.8980733 | -1.3822632 | C    | 0.8706341  | -0.2797771 | -3.8444239 |
| C    | 1.6332959  | 7.3211226 | -0.996795  | C    | 2.1198401  | 0.0072837  | -3.2855722 |
| C    | 0.7964722  | 6.5506692 | -0.0911308 | C    | 2.3441431  | 1.192785   | -2.5853209 |
| C    | 1.2501377  | 5.2499601 | 0.453646   | C    | -1.6568402 | 14.610574  | 5.4377942  |
| C    | 2.5824665  | 4.6748756 | -0.0863519 | C    | -1.4776832 | 14.856215  | 6.7910578  |
| C    | 3.3575335  | 5.5647966 | -1.1012029 | C    | -1.5828504 | 13.823873  | 7.7372468  |
| C    | 0.9836418  | 8.4875015 | -1.553789  | C    | -1.8451532 | 12.521153  | 7.3380711  |
| C    | -0.3259705 | 8.7306914 | -1.3350871 | C    | -2.0151908 | 12.238201  | 5.9791322  |
| O    | -1.0499477 | 8.0089892 | -0.420084  | C    | 3.7292488  | 1.4179672  | -2.0182773 |
| C    | -0.4688261 | 6.9439893 | 0.1710168  | O    | -0.9795037 | 2.732316   | -2.9302884 |
| C    | -1.1960717 | 9.6488922 | -2.1694783 | O    | 0.6198385  | -1.4320813 | -4.5215627 |
| C    | -2.4416832 | 10.11172  | -1.4392472 | C    | -1.4902477 | 15.780028  | 4.4927088  |
| C    | -3.6197901 | 9.4913749 | -1.6884729 | O    | -1.4009876 | 14.165756  | 9.0411486  |
| C    | -3.8801757 | 8.3606982 | -2.6360534 | O    | -2.2433212 | 10.953309  | 5.6666059  |
| C    | -2.6328859 | 7.8556612 | -3.3836125 | H    | 3.4755132  | 7.4877037  | -2.0696464 |
| C    | -1.560906  | 8.9566053 | -3.5253899 | H    | 1.5102601  | 9.0890246  | -2.2884036 |
| C    | -2.3614948 | 11.193802 | -0.4615154 | H    | -1.1444039 | 6.4119362  | 0.8275955  |
| C    | -3.6323581 | 11.547755 | 0.1538952  | H    | -0.5898379 | 10.523863  | -2.4212656 |
| C    | -4.7562394 | 10.87276  | -0.1725359 | H    | -4.6346136 | 8.7010706  | -3.3543822 |
| O    | -4.7883345 | 9.8673524 | -1.0677446 | H    | -4.3200307 | 7.5295096  | -2.0734289 |
| C    | -1.200377  | 11.82729  | -0.1122543 | H    | -2.9399223 | 7.5964578  | -4.4040026 |
| C    | -1.1465553 | 12.880676 | 0.8843445  | H    | -0.6445329 | 8.5128649  | -3.9275953 |
| C    | -2.4846479 | 13.507967 | 1.3604538  | H    | -5.7260683 | 11.07996   | 0.2623239  |
| C    | -3.7339672 | 12.628628 | 1.1689739  | H    | -0.2397639 | 11.527374  | -0.5155451 |
| O    | -2.3649003 | 13.901689 | 2.7366413  | H    | -2.8116269 | 14.615038  | -0.486954  |
| C    | -2.1957439 | 12.892931 | 3.6144536  | H    | -3.6109805 | 15.306429  | 0.9481387  |
| C    | -1.952869  | 13.280823 | 5.0022315  | H    | -1.8399106 | 15.469006  | 0.7343393  |
| C    | -2.7038495 | 14.8164   | 0.5839607  | H    | 3.7712857  | 5.2483099  | 1.6309178  |
| O    | 2.293887   | 3.3941042 | -0.7227151 | H    | 2.9830133  | 3.6595689  | 1.7704055  |
| C    | 1.4315671  | 3.4238128 | -1.7604261 | H    | 4.4136018  | 3.8741001  | 0.7043576  |
| C    | 1.2854467  | 2.1298171 | -2.4570876 | H    | -1.469324  | 11.601917  | -5.359479  |
| C    | 3.5012635  | 4.3364828 | 1.0873495  | H    | -0.5718806 | 5.3666071  | -2.9351528 |
| O    | 0.6123289  | 4.6252915 | 1.2829884  | H    | -1.1400156 | 0.3975594  | -4.1745078 |
| O    | 4.3538784  | 5.0848512 | -1.6383408 | H    | 2.9341799  | -0.7047872 | -3.4009059 |
| O    | -4.7710838 | 12.878909 | 1.7568982  | H    | -1.243591  | 15.854759  | 7.1440203  |
| O    | -0.0969672 | 13.351126 | 1.3060926  | H    | -1.9106952 | 11.701383  | 8.0479553  |

|                                                               |            |           |            |   |            |              |            |
|---------------------------------------------------------------|------------|-----------|------------|---|------------|--------------|------------|
| C                                                             | -2.0141696 | 9.992379  | -4.5532068 | H | 4.4370346  | 0.7227854    | -2.4798671 |
| C                                                             | -2.1012323 | 6.5353073 | -2.7983162 | H | 4.087398   | 2.4387636    | -2.1721723 |
| O                                                             | -3.0212969 | 9.9322609 | -5.2230349 | H | 3.7392047  | 1.2442614    | -0.936895  |
| O                                                             | -1.1202509 | 11.002211 | -4.672944  | H | -1.7923609 | 2.343969     | -3.2906392 |
| O                                                             | -0.9221795 | 6.1997685 | -3.3386259 | H | 1.4228253  | -1.976831    | -4.529666  |
| O                                                             | -2.703839  | 5.8578035 | -1.9924422 | H | -1.1231898 | 16.650646    | 5.0437475  |
| O                                                             | 0.8364547  | 4.4546116 | -2.0512735 | H | -0.78473   | 15.548756    | 3.6895852  |
| O                                                             | -2.276686  | 11.719331 | 3.2209267  | H | -2.436812  | 16.049432    | 4.013946   |
| C                                                             | 0.0323372  | 1.8311215 | -3.0542391 | H | -1.4906905 | 13.371909    | 9.5921186  |
| C                                                             | -0.1768637 | 0.6313355 | -3.7295865 | H | -2.2918524 | 10.896449    | 4.6785086  |
| <b>NImag</b>                                                  |            |           |            |   |            | 0            |            |
| <b><math>\Sigma</math> Electronic and thermal Free Energy</b> |            |           |            |   |            | -1865692.367 |            |
| <b>mol Fraction</b>                                           |            |           |            |   |            | 3.09E-08     |            |



**(8S, 13S, 8aS, 12aS, 13aS)-Diazaphilonic acid (2) - Conformer 37**

| Atom | X          | Y         | Z          | Atom | X          | Y          | Z          |
|------|------------|-----------|------------|------|------------|------------|------------|
| C    | 1.8351746  | 6.9752083 | -1.6573227 | C    | 2.1823574  | -1.1919006 | -1.9579654 |
| C    | 0.5217994  | 7.3319571 | -1.5886593 | C    | 1.056867   | -0.6283987 | -2.5667329 |
| C    | -0.4766058 | 6.489193  | -0.9424328 | C    | 0.7754985  | 0.73094    | -2.4322751 |
| C    | -0.1008289 | 5.1895317 | -0.3228158 | C    | -1.9381482 | 11.472744  | 5.9667898  |
| C    | 1.4068715  | 4.9125958 | -0.1648303 | C    | -1.3236356 | 11.544751  | 7.2093713  |
| C    | 2.3361999  | 5.7204417 | -1.1164555 | C    | -0.1178725 | 12.244749  | 7.3654073  |
| C    | -0.0189206 | 8.5442895 | -2.1758311 | C    | 0.4889536  | 12.866702  | 6.281078   |
| C    | -1.3338192 | 8.834842  | -2.1199186 | C    | -0.1140699 | 12.815741  | 5.0183358  |
| O    | -2.2295838 | 8.0143495 | -1.475163  | C    | -0.4571716 | 1.2706986  | -3.1226316 |
| C    | -1.772971  | 6.8664154 | -0.9198635 | O    | 3.6021521  | 1.7430902  | -0.3157679 |
| C    | -2.0083017 | 10.020634 | -2.7773764 | O    | 2.4930739  | -2.5131691 | -2.0746486 |
| C    | -3.0878346 | 10.633215 | -1.8987645 | C    | -3.2354209 | 10.707444  | 5.834669   |
| C    | -4.3934855 | 10.41701  | -2.1936609 | O    | 0.4249887  | 12.268457  | 8.6154185  |
| C    | -4.9560575 | 9.6434903 | -3.3455164 | O    | 0.5832732  | 13.40141   | 4.0238212  |
| C    | -3.8957455 | 8.9159208 | -4.1861126 | H    | 2.5583015  | 7.5953363  | -2.1788709 |
| C    | -2.5493043 | 9.6690127 | -4.2004122 | H    | 0.6477376  | 9.2277293  | -2.6927479 |
| C    | -2.7178504 | 11.441903 | -0.7398276 | H    | -2.5636499 | 6.2854137  | -0.4623993 |
| C    | -3.8412384 | 11.9734   | 0.0162376  | H    | -1.2226151 | 10.766886  | -2.9251132 |
| C    | -5.1071781 | 11.697556 | -0.3657083 | H    | -5.5096839 | 10.346358  | -3.9787118 |
| O    | -5.4113765 | 10.947589 | -1.441562  | H    | -5.678647  | 8.9160327  | -2.9611054 |
| C    | -1.4227472 | 11.681317 | -0.3553379 | H    | -4.251578  | 8.8986637  | -5.2239925 |
| C    | -1.1022969 | 12.432458 | 0.8334983  | H    | -1.7923183 | 9.0501044  | -4.693529  |
| C    | -2.2056419 | 13.28137  | 1.5041561  | H    | -5.9830814 | 12.053938  | 0.1617182  |
| C    | -3.646205  | 12.821279 | 1.2258394  | H    | -0.580388  | 11.227124  | -0.8625258 |
| O    | -1.9306986 | 13.323107 | 2.90558    | H    | -2.25203   | 14.798773  | -0.0654352 |
| C    | -2.0168056 | 12.108897 | 3.5440021  | H    | -2.8118108 | 15.350746  | 1.5351974  |
| C    | -1.3532517 | 12.1405   | 4.8566346  | H    | -1.0681426 | 15.099498  | 1.2303181  |
| C    | -2.0753677 | 14.73416  | 1.013175   | H    | 1.6570282  | 6.3096022  | 1.4944106  |
| O    | 1.6525703  | 3.5087279 | -0.3076044 | H    | 1.1994488  | 4.6528105  | 1.9715828  |
| C    | 1.3254191  | 2.9952704 | -1.5150039 | H    | 2.8637836  | 5.001429   | 1.4160393  |
| C    | 1.6273522  | 1.5491938 | -1.6485181 | H    | -1.6959817 | 12.418432  | -5.6479046 |
| C    | 1.8068566  | 5.2458821 | 1.2824964  | H    | -2.7051826 | 5.9211707  | -4.1017714 |
| O    | -0.9339689 | 4.413424  | 0.1106073  | H    | 3.9114923  | -0.8511427 | -0.7352659 |
| O    | 3.4753542  | 5.3222048 | -1.3127668 | H    | 0.3905289  | -1.2576058 | -3.1531345 |
| O    | -4.5791962 | 13.230825 | 1.8913287  | H    | -1.7644675 | 11.065347  | 8.0769237  |
| O    | 0.0317987  | 12.472406 | 1.3183787  | H    | 1.4428365  | 13.378658  | 6.3751503  |

|                                                               |            |            |            |   |            |              |            |
|---------------------------------------------------------------|------------|------------|------------|---|------------|--------------|------------|
| C                                                             | -2.6803429 | 10.927024  | -5.0600853 | H | -1.0617596 | 0.4462688    | -3.5131111 |
| C                                                             | -3.7844344 | 7.4404404  | -3.8033871 | H | -1.0758359 | 1.864283     | -2.4430075 |
| O                                                             | -3.6554393 | 11.241392  | -5.7058508 | H | -0.186104  | 1.9315225    | -3.9509295 |
| O                                                             | -1.5406229 | 11.655272  | -5.0592252 | H | 4.3606251  | 1.2074353    | -0.0348937 |
| O                                                             | -2.687448  | 6.8655416  | -4.3495319 | H | 1.8230697  | -2.9462689   | -2.6266237 |
| O                                                             | -4.5990245 | 6.8218418  | -3.1584139 | H | -3.5874612 | 10.385549    | 6.8188916  |
| O                                                             | 0.7900069  | 3.6797024  | -2.3745849 | H | -4.0209259 | 11.312593    | 5.3693305  |
| O                                                             | -2.5846226 | 11.166773  | 3.0199224  | H | -3.109298  | 9.8240145    | 5.201404   |
| C                                                             | 2.7617619  | 0.958635   | -1.0375277 | H | 1.2488741  | 12.780298    | 8.5905889  |
| C                                                             | 3.0373628  | -0.4001954 | -1.1972055 | H | 0.2121195  | 13.202398    | 3.1365368  |
| <b>NImag</b>                                                  |            |            |            |   |            | 0            |            |
| <b><math>\Sigma</math> Electronic and thermal Free Energy</b> |            |            |            |   |            | -1865688.115 |            |
| <b>mol Fraction</b>                                           |            |            |            |   |            | 2.34E-11     |            |

**(8S, 13S, 8aS, 12aS, 13aS)-Diazaphilonic acid (2) - Conformer 38**

| Atom | X          | Y         | Z          | Atom | X          | Y          | Z          |
|------|------------|-----------|------------|------|------------|------------|------------|
| C    | 2.0909782  | 7.2553079 | -1.9193089 | C    | 3.1566726  | -0.7831878 | -2.2657839 |
| C    | 0.7531233  | 7.5078527 | -1.8302037 | C    | 3.6945718  | -0.0835208 | -1.1737051 |
| C    | -0.1609371 | 6.6150354 | -1.1310197 | C    | 3.3435875  | 1.2348142  | -0.9225335 |
| C    | 0.3262811  | 5.3754029 | -0.4703127 | C    | -1.6454692 | 11.110863  | 5.8264456  |
| C    | 1.8543864  | 5.231045  | -0.3407732 | C    | -0.9882694 | 11.158775  | 7.0479973  |
| C    | 2.6998828  | 6.0710801 | -1.3406389 | C    | 0.1824078  | 11.918034  | 7.1951441  |
| C    | 0.1078025  | 8.6616016 | -2.4271908 | C    | 0.7116934  | 12.624212  | 6.1217861  |
| C    | -1.2218479 | 8.8625906 | -2.3331941 | C    | 0.0639276  | 12.599019  | 4.8807287  |
| O    | -2.0383701 | 7.9912528 | -1.6495368 | C    | 4.0016659  | 1.9152986  | 0.2574172  |
| C    | -1.4802731 | 6.8967997 | -1.0827624 | O    | 1.0756385  | 1.7102707  | -3.821389  |
| C    | -1.9847685 | 10.020417 | -2.945019  | O    | 3.5538219  | -2.0747731 | -2.4232623 |
| C    | -3.0587407 | 10.548747 | -2.0060902 | C    | -2.9030381 | 10.280459  | 5.7038598  |
| C    | -4.3614344 | 10.272731 | -2.2570792 | O    | 0.7706228  | 11.912982  | 8.4242885  |
| C    | -4.9273623 | 9.5244072 | -3.4237357 | O    | 0.6892089  | 13.26977   | 3.892002   |
| C    | -3.8644296 | 8.8780417 | -4.3307575 | H    | 2.7495629  | 7.9120231  | -2.4797542 |
| C    | -2.5560422 | 9.6882821 | -4.3613423 | H    | 0.7090536  | 9.3843308  | -2.9700612 |
| C    | -2.6861643 | 11.334206 | -0.8312099 | H    | -2.2070262 | 6.2724701  | -0.5786183 |
| C    | -3.8050584 | 11.771841 | -0.0106344 | H    | -1.245405  | 10.811926  | -3.0959149 |
| C    | -5.0688042 | 11.441098 | -0.3534258 | H    | -5.5120758 | 10.238677  | -4.0162932 |
| O    | -5.3762024 | 10.716541 | -1.4463677 | H    | -5.6326687 | 8.7743592  | -3.0550005 |
| C    | -1.392044  | 11.63282  | -0.4888009 | H    | -4.2699101 | 8.8938846  | -5.3507205 |
| C    | -1.0643813 | 12.351577 | 0.7187173  | H    | -1.7978789 | 9.0987435  | -4.8892248 |
| C    | -2.1834984 | 13.107599 | 1.4693544  | H    | -5.9401619 | 11.727804  | 0.2218212  |
| C    | -3.6072744 | 12.58098  | 1.2251281  | H    | -0.5474877 | 11.249368  | -1.0478854 |
| O    | -1.8550344 | 13.100508 | 2.8599449  | H    | -2.3740021 | 14.688997  | -0.0241252 |
| C    | -1.8524049 | 11.855594 | 3.4426004  | H    | -2.8977257 | 15.136708  | 1.6206159  |
| C    | -1.1415447 | 11.862672 | 4.7301584  | H    | -1.1567448 | 14.99624   | 1.2386737  |
| C    | -2.1508999 | 14.585885 | 1.0428396  | H    | 1.9945853  | 6.7004773  | 1.2630079  |
| O    | 2.2275999  | 3.8482458 | -0.446621  | H    | 1.7130007  | 5.0271145  | 1.8074002  |
| C    | 1.9394228  | 3.2600115 | -1.6243312 | H    | 3.3264397  | 5.5227886  | 1.2087355  |
| C    | 2.417675   | 1.8892879 | -1.7939682 | H    | -1.8550017 | 12.506372  | -5.7558236 |
| C    | 2.2478159  | 5.6502724 | 1.0853643  | H    | -4.3542068 | 5.7991645  | -3.495718  |
| O    | -0.428526  | 4.5591391 | 0.0267446  | H    | 1.8621261  | -0.6756823 | -4.0040478 |
| O    | 3.8638597  | 5.7470935 | -1.5379303 | H    | 4.4017777  | -0.597701  | -0.5318714 |
| O    | -4.5338628 | 12.911429 | 1.9414888  | H    | -1.3682173 | 10.614775  | 7.9061883  |
| O    | 0.0846451  | 12.433705 | 1.1603636  | H    | 1.6387749  | 13.184655  | 6.2067014  |

|                                                               |            |            |            |   |            |             |            |
|---------------------------------------------------------------|------------|------------|------------|---|------------|-------------|------------|
| C                                                             | -2.7595836 | 10.960304  | -5.181433  | H | 4.7753095  | 1.2644339   | 0.6747566  |
| C                                                             | -3.5739131 | 7.3999022  | -4.0843393 | H | 4.4595106  | 2.8653865   | -0.0322394 |
| O                                                             | -3.7657528 | 11.250933  | -5.7905688 | H | 3.2785761  | 2.141086    | 1.0473013  |
| O                                                             | -1.6520418 | 11.735917  | -5.1916576 | H | 0.954014   | 2.6621376   | -3.5727736 |
| O                                                             | -4.6172636 | 6.7387412  | -3.5383902 | H | 3.1235422  | -2.4443805  | -3.2106551 |
| O                                                             | -2.5491467 | 6.8463176  | -4.4163948 | H | -3.1985781 | 9.893599    | 6.6832409  |
| O                                                             | 1.2798331  | 3.8789345  | -2.4730474 | H | -3.7378764 | 10.861422   | 5.2972778  |
| O                                                             | -2.3900003 | 10.909101  | 2.8943522  | H | -2.7533549 | 9.4360247   | 5.0242038  |
| C                                                             | 1.9139579  | 1.1704332  | -2.9228522 | H | 1.5634362  | 12.471638   | 8.3962574  |
| C                                                             | 2.2753062  | -0.1629829 | -3.1399042 | H | 0.2940256  | 13.093776   | 3.0106095  |
| <b>NImag</b>                                                  |            |            |            |   |            | 0           |            |
| <b><math>\Sigma</math> Electronic and thermal Free Energy</b> |            |            |            |   |            | -1865697.83 |            |
| <b>mol Fraction</b>                                           |            |            |            |   |            | 0.000315077 |            |

**(8S, 13S, 8aS, 12aS, 13aS)-Diazaphilonic acid (2) - Conformer 39**

| Atom | X          | Y         | Z          | Atom | X          | Y          | Z          |
|------|------------|-----------|------------|------|------------|------------|------------|
| C    | 1.621669   | 7.483371  | -2.0737938 | C    | 2.6055856  | 0.021339   | 0.1880047  |
| C    | 0.3943098  | 8.0281044 | -1.7975027 | C    | 1.2205527  | 0.2319834  | 0.0931545  |
| C    | -0.3979519 | 7.6366484 | -0.637616  | C    | 0.7102932  | 1.5132872  | -0.0797174 |
| C    | 0.1306896  | 6.6719967 | 0.3531151  | C    | 0.0360893  | 10.928955  | 4.4079935  |
| C    | 1.5948838  | 6.2424443 | 0.1677911  | C    | 0.8231506  | 10.164828  | 5.2645473  |
| C    | 2.1868422  | 6.4515151 | -1.2471357 | C    | 0.7329079  | 8.7694264  | 5.2850323  |
| C    | -0.2284955 | 9.0289945 | -2.6380888 | C    | -0.1618865 | 8.1148892  | 4.4446314  |
| C    | -1.4758499 | 9.482698  | -2.3948767 | C    | -0.9705401 | 8.8582852  | 3.5792992  |
| O    | -2.2036604 | 9.0146985 | -1.3326709 | C    | -0.787283  | 1.6967051  | -0.1802436 |
| C    | -1.6404679 | 8.1557361 | -0.4663191 | O    | 3.9468979  | 3.3398532  | -0.208128  |
| C    | -2.2243095 | 10.530427 | -3.2141632 | O    | 3.1329403  | -1.2242498 | 0.3566611  |
| C    | -3.2917585 | 11.200934 | -2.3645075 | C    | 0.2655856  | 12.425191  | 4.4356131  |
| C    | -4.6045181 | 10.979438 | -2.6100358 | O    | 1.5444068  | 8.1051709  | 6.1514596  |
| C    | -5.1858135 | 10.21411  | -3.7587349 | O    | -1.8639075 | 8.2069332  | 2.7959419  |
| C    | -4.1601673 | 9.2730656 | -4.4011715 | H    | 2.1616052  | 7.7504091  | -2.9768597 |
| C    | -2.7824508 | 9.9522093 | -4.5538043 | H    | 0.3200886  | 9.4257712  | -3.4868065 |
| C    | -2.8832562 | 11.946458 | -1.1749937 | H    | -2.283523  | 7.952833   | 0.3780347  |
| C    | -3.9532267 | 12.179455 | -0.22006   | H    | -1.4712451 | 11.272866  | -3.4949854 |
| C    | -5.2346827 | 11.95262  | -0.5777596 | H    | -5.5559507 | 10.916397  | -4.5147228 |
| O    | -5.5908111 | 11.454143 | -1.7818804 | H    | -6.0406828 | 9.6386944  | -3.3940624 |
| C    | -1.6003491 | 12.334425 | -0.9130705 | H    | -4.5063023 | 9.0224924  | -5.41129   |
| C    | -1.1782235 | 12.840766 | 0.3788922  | H    | -2.0587077 | 9.2153127  | -4.9189469 |
| C    | -2.2277213 | 13.054733 | 1.5077588  | H    | -6.0835885 | 12.13483   | 0.068908   |
| C    | -3.6709811 | 12.626868 | 1.1691373  | H    | -0.7952017 | 12.179561  | -1.6228887 |
| O    | -1.772272  | 12.330542 | 2.677551   | H    | -2.5857629 | 15.154617  | 1.0888143  |
| C    | -1.6707042 | 10.983264 | 2.4965025  | H    | -2.9137153 | 14.661747  | 2.7668343  |
| C    | -0.8920608 | 10.278369 | 3.53722    | H    | -1.2239169 | 14.83409   | 2.1857886  |
| C    | -2.2379798 | 14.529102 | 1.918528   | H    | 2.386292   | 8.1214714  | 0.9508733  |
| O    | 1.7782475  | 4.8695964 | 0.5190146  | H    | 2.0746722  | 6.8713639  | 2.1797283  |
| C    | 1.074637   | 3.9819368 | -0.2562132 | H    | 3.4862889  | 6.7281507  | 1.0913171  |
| C    | 1.6025159  | 2.6149011 | -0.1295128 | H    | -1.7970432 | 12.334895  | -6.4853534 |
| C    | 2.4443916  | 7.0502461 | 1.1669008  | H    | -3.1114808 | 6.3295066  | -3.6144333 |
| O    | -0.4915833 | 6.2994171 | 1.3413109  | H    | 4.5636729  | 0.9163127  | 0.1298135  |
| O    | 3.1573436  | 5.7617183 | -1.573137  | H    | 0.5397235  | -0.6144277 | 0.158804   |
| O    | -4.5488705 | 12.71008  | 2.0106881  | H    | 1.5384616  | 10.642687  | 5.92509    |
| O    | -0.0019133 | 13.083906 | 0.634201   | H    | -0.2600266 | 7.0314899  | 4.4631035  |

|                                                               |            |           |            |   |            |              |            |
|---------------------------------------------------------------|------------|-----------|------------|---|------------|--------------|------------|
| C                                                             | -2.8506131 | 11.022255 | -5.6436169 | H | -1.3013268 | 0.7526103    | 0.0234927  |
| C                                                             | -4.0880537 | 7.9429742 | -3.652906  | H | -1.1561932 | 2.4475127    | 0.5265089  |
| O                                                             | -3.7982577 | 11.234155 | -6.3667713 | H | -1.0756187 | 2.0432231    | -1.1773234 |
| O                                                             | -1.682734  | 11.69637  | -5.7556707 | H | 3.5746029  | 4.2018421    | -0.4995913 |
| O                                                             | -3.0744159 | 7.1694299 | -4.1112725 | H | 2.4097766  | -1.8700309   | 0.3863863  |
| O                                                             | -4.8543113 | 7.5788155 | -2.7918581 | H | 1.0921389  | 12.657243    | 5.1133725  |
| O                                                             | 0.1357665  | 4.3558878 | -0.9392128 | H | 0.5063613  | 12.812745    | 3.44166    |
| O                                                             | -2.1755044 | 10.468476 | 1.5092402  | H | -0.6233574 | 12.962993    | 4.7774115  |
| C                                                             | 3.0071177  | 2.3849342 | -0.072235  | H | 1.3889404  | 7.1508351    | 6.0694175  |
| C                                                             | 3.4937377  | 1.0846817 | 0.0964484  | H | -1.5244934 | 7.3145994    | 2.5829801  |
| <b>NImag</b>                                                  |            |           |            |   |            | 0            |            |
| <b><math>\Sigma</math> Electronic and thermal Free Energy</b> |            |           |            |   |            | -1865686.697 |            |
| <b>mol Fraction</b>                                           |            |           |            |   |            | 2.13E-12     |            |

**(8S, 13S, 8aS, 12aS, 13aS)-Diazaphilonic acid (2) - Conformer 40**

| Atom | X          | Y         | Z          | Atom | X          | Y          | Z          |
|------|------------|-----------|------------|------|------------|------------|------------|
| C    | 1.6832087  | 6.9640638 | -1.8324084 | C    | 3.1645848  | -0.7611696 | -1.8112708 |
| C    | 0.3675499  | 7.3314706 | -1.7419702 | C    | 1.8288723  | -0.6137141 | -2.2135962 |
| C    | -0.6104981 | 6.5462548 | -1.0047142 | C    | 1.1977545  | 0.6188338  | -2.1133959 |
| C    | -0.2236085 | 5.2992137 | -0.2873053 | C    | -0.7802536 | 13.069544  | 5.4637977  |
| C    | 1.2882146  | 5.0344392 | -0.1764337 | C    | -0.476575  | 12.922386  | 6.8106875  |
| C    | 2.1706732  | 5.7478399 | -1.2307426 | C    | -0.8649614 | 11.777508  | 7.5279374  |
| C    | -0.1804265 | 8.5088746 | -2.3823642 | C    | -1.5436496 | 10.744888  | 6.8985439  |
| C    | -1.4886743 | 8.8268787 | -2.2899107 | C    | -1.8483671 | 10.854331  | 5.5403693  |
| O    | -2.366801  | 8.0566792 | -1.5683695 | C    | -0.2420392 | 0.7425981  | -2.5584049 |
| C    | -1.9009824 | 6.9421461 | -0.9615933 | O    | 4.0658587  | 2.569138   | -0.7665441 |
| C    | -2.1522944 | 10.022137 | -2.9446049 | O    | 3.7159996  | -2.0015643 | -1.9415342 |
| C    | -3.1780041 | 10.673234 | -2.0301535 | C    | -0.2894288 | 14.322974  | 4.773408   |
| C    | -4.498255  | 10.512631 | -2.2827117 | O    | -0.5806626 | 11.630815  | 8.8494018  |
| C    | -5.1261585 | 9.7848338 | -3.4306441 | O    | -2.4847417 | 9.8092758  | 4.9890142  |
| C    | -4.123624  | 9.0063898 | -4.3017899 | H    | 2.3846631  | 7.5338779  | -2.4338922 |
| C    | -2.7449437 | 9.6888133 | -4.3520265 | H    | 0.475478   | 9.1556367  | -2.9566093 |
| C    | -2.7364948 | 11.458546 | -0.8765168 | H    | -2.6736877 | 6.4024253  | -0.4289074 |
| C    | -3.8159373 | 12.022158 | -0.0778664 | H    | -1.3479148 | 10.74235   | -3.1188264 |
| C    | -5.1032178 | 11.79976  | -0.4192047 | H    | -5.632691  | 10.53164   | -4.0543038 |
| O    | -5.4732773 | 11.074447 | -1.4931643 | H    | -5.9050345 | 9.1203218  | -3.0462015 |
| C    | -1.4269224 | 11.655361 | -0.5366324 | H    | -4.5205114 | 9.0183887  | -5.3252156 |
| C    | -1.019074  | 12.408875 | 0.6360208  | H    | -2.0429331 | 9.0107567  | -4.8505868 |
| C    | -2.08616   | 13.259647 | 1.3739524  | H    | -5.9469252 | 12.182218  | 0.1414236  |
| C    | -3.547631  | 12.837941 | 1.136637   | H    | -0.6152216 | 11.195779  | -1.0875563 |
| O    | -1.7983392 | 13.266756 | 2.7813065  | H    | -2.1403689 | 14.815442  | -0.149807  |
| C    | -1.9090353 | 12.072231 | 3.3982015  | H    | -2.6380946 | 15.346439  | 1.4767974  |
| C    | -1.4998976 | 12.030957 | 4.7995878  | H    | -0.909298  | 15.048355  | 1.113062   |
| C    | -1.9342848 | 14.720526 | 0.9214969  | H    | 1.5670486  | 6.5639909  | 1.3588264  |
| O    | 1.5809006  | 3.63775   | -0.2384593 | H    | 1.1668622  | 4.9395317  | 1.9758507  |
| C    | 1.2325949  | 3.0270507 | -1.4187904 | H    | 2.8037301  | 5.2832339  | 1.345404   |
| C    | 1.9043648  | 1.7258943 | -1.5711742 | H    | -1.7760854 | 12.373534  | -5.8460389 |
| C    | 1.7373276  | 5.4911128 | 1.2238845  | H    | -4.9111748 | 6.0203207  | -3.3658785 |
| O    | -1.0364308 | 4.5933208 | 0.2796885  | H    | 4.9294239  | 0.2349859  | -1.0402473 |
| O    | 3.282834   | 5.2702404 | -1.4700804 | H    | 1.3015589  | -1.4794897 | -2.599967  |
| O    | -4.4395192 | 13.239967 | 1.8619462  | H    | 0.0813426  | 13.705604  | 7.3197514  |
| O    | 0.1418344  | 12.460709 | 1.0231854  | H    | -1.8275538 | 9.8507339  | 7.4404158  |

|                                                               |            |           |            |   |            |              |            |
|---------------------------------------------------------------|------------|-----------|------------|---|------------|--------------|------------|
| C                                                             | -2.82355   | 10.940646 | -5.2232202 | H | -0.6444724 | -0.2409703   | -2.817534  |
| C                                                             | -3.9741204 | 7.5193809 | -3.9922705 | H | -0.8741547 | 1.1781844    | -1.7769678 |
| O                                                             | -3.7928054 | 11.296713 | -5.8568163 | H | -0.3302476 | 1.3989998    | -3.429429  |
| O                                                             | -1.6494466 | 11.611035 | -5.2497151 | H | 3.6486171  | 3.4544737    | -0.8564197 |
| O                                                             | -5.0865275 | 6.9772665 | -3.4517215 | H | 4.6339188  | -1.9706679   | -1.6287957 |
| O                                                             | -2.9957457 | 6.8628035 | -4.2729973 | H | 0.3642946  | 14.885791    | 5.4463885  |
| O                                                             | 0.4603036  | 3.5590867 | -2.1960048 | H | 0.2659756  | 14.087033    | 3.861336   |
| O                                                             | -2.3622164 | 11.102042 | 2.7719551  | H | -1.1197171 | 14.972209    | 4.4787639  |
| C                                                             | 3.2671048  | 1.5741598 | -1.2010968 | H | -0.1013051 | 12.41526     | 9.1596568  |
| C                                                             | 3.882651   | 0.3215731 | -1.3189935 | H | -2.5862468 | 10.000888    | 4.023699   |
| <b>NImag</b>                                                  |            |           |            |   |            | 0            |            |
| <b><math>\Sigma</math> Electronic and thermal Free Energy</b> |            |           |            |   |            | -1865697.666 |            |
| <b>mol Fraction</b>                                           |            |           |            |   |            | 0.000238909  |            |



**(8S, 13S, 8aS, 12aS, 13aS)-Diazaphilonic acid (2) - Conformer 41**

| Atom | X          | Y         | Z          | Atom | X          | Y          | Z          |
|------|------------|-----------|------------|------|------------|------------|------------|
| C    | 1.9577843  | 7.1204746 | -1.9981438 | C    | 2.9248404  | -0.9394955 | -1.9205659 |
| C    | 0.6357496  | 7.4325877 | -1.8738528 | C    | 3.7800133  | -0.0108711 | -1.3241752 |
| C    | -0.2883729 | 6.5969722 | -1.1207518 | C    | 3.3972199  | 1.3211186  | -1.1686321 |
| C    | 0.1733929  | 5.3589705 | -0.4367174 | C    | -0.3322882 | 13.326913  | 5.3440146  |
| C    | 1.6984802  | 5.1558908 | -0.3468591 | C    | 0.0558038  | 13.230153  | 6.6718506  |
| C    | 2.5354001  | 5.9263245 | -1.4075793 | C    | -0.1925324 | 12.067294  | 7.4192779  |
| C    | 0.0188813  | 8.5967034 | -2.480674  | C    | -0.8152016 | 10.971692  | 6.8386348  |
| C    | -1.2971945 | 8.8563489 | -2.3474548 | C    | -1.205763  | 11.03237   | 5.49733    |
| O    | -2.1253351 | 8.0357969 | -1.6164338 | C    | 4.3837303  | 2.2631627  | -0.5132517 |
| C    | -1.5927434 | 6.9333292 | -1.0386669 | O    | 0.053521   | 1.1950195  | -2.6824211 |
| C    | -2.0322915 | 10.031827 | -2.9588079 | O    | 3.3698223  | -2.2241198 | -2.0270627 |
| C    | -3.0266376 | 10.644732 | -1.984695  | C    | 0.0083644  | 14.607424  | 4.6142246  |
| C    | -4.3505237 | 10.41762  | -2.1518723 | O    | 0.2175899  | 12.072555  | 8.7156694  |
| C    | -5.0142415 | 9.6483565 | -3.2517146 | O    | -1.7826962 | 9.9279371  | 4.9992676  |
| C    | -4.0343817 | 8.93499   | -4.201389  | H    | 2.6242783  | 7.7313384  | -2.5996165 |
| C    | -2.6966055 | 9.6859452 | -4.330072  | H    | 0.6309163  | 9.2801889  | -3.0609629 |
| C    | -2.5523514 | 11.46111  | -0.8660799 | H    | -2.326956  | 6.3519921  | -0.4955398 |
| C    | -3.6064523 | 11.981979 | -0.0063767 | H    | -1.2633683 | 10.778594  | -3.175017  |
| C    | -4.9001504 | 11.693098 | -0.2634503 | H    | -5.6144281 | 10.360769  | -3.8308823 |
| O    | -5.3011644 | 10.938843 | -1.3054266 | H    | -5.7168999 | 8.9353998  | -2.8110875 |
| C    | -1.2353306 | 11.7223   | -0.608582  | H    | -4.4971566 | 8.9442102  | -5.1967088 |
| C    | -0.7932952 | 12.512454 | 0.5271679  | H    | -1.9963392 | 9.0489723  | -4.8824669 |
| C    | -1.8543669 | 13.324728 | 1.3161178  | H    | -5.7244117 | 12.040544  | 0.3467475  |
| C    | -3.3032048 | 12.823151 | 1.1818975  | H    | -0.4382301 | 11.291838  | -1.2025698 |
| O    | -1.4795815 | 13.382853 | 2.7014227  | H    | -2.0862507 | 14.837507  | -0.234402  |
| C    | -1.4835002 | 12.201282 | 3.350677   | H    | -2.5077038 | 15.383251  | 1.4090332  |
| C    | -0.9968586 | 12.219938 | 4.7277657  | H    | -0.7922424 | 15.164177  | 0.9419066  |
| C    | -1.8087035 | 14.780022 | 0.8233056  | H    | 1.9462162  | 6.6893263  | 1.1873662  |
| O    | 2.0057322  | 3.7583326 | -0.399322  | H    | 1.6193194  | 5.0512161  | 1.8106737  |
| C    | 1.6661681  | 3.1521256 | -1.5721064 | H    | 3.2293519  | 5.4578821  | 1.1436118  |
| C    | 2.1271344  | 1.7418341 | -1.6412378 | H    | -1.9616436 | 12.433413  | -5.8421782 |
| C    | 2.1530885  | 5.6233727 | 1.0469133  | H    | -4.5741527 | 5.9033516  | -3.2314058 |
| O    | -0.5982146 | 4.5935015 | 0.1124739  | H    | 0.996871   | -1.2640554 | -2.8453889 |
| O    | 3.6796956  | 5.5565795 | -1.6454828 | H    | 4.7548625  | -0.3466678 | -0.9868893 |
| O    | -4.1651405 | 13.183448 | 1.9634607  | H    | 0.5688039  | 14.053026  | 7.1577809  |
| O    | 0.3847783  | 12.627386 | 0.8411589  | H    | -1.0012559 | 10.053814  | 7.3891548  |

|                                                               |            |            |            |   |            |              |            |
|---------------------------------------------------------------|------------|------------|------------|---|------------|--------------|------------|
| C                                                             | -2.8933122 | 10.942496  | -5.1746667 | H | 5.3829888  | 1.8173458    | -0.5182629 |
| C                                                             | -3.7890982 | 7.4519219  | -3.936781  | H | 4.4262781  | 3.2366965    | -1.0073915 |
| O                                                             | -3.9187259 | 11.259176  | -5.7373057 | H | 4.1026585  | 2.4521703    | 0.5289004  |
| O                                                             | -1.7575723 | 11.670629  | -5.2682166 | H | -0.4189544 | 0.4266772    | -3.0383348 |
| O                                                             | -4.8055639 | 6.8509038  | -3.2803242 | H | 2.6920428  | -2.7620426   | -2.4650736 |
| O                                                             | -2.8233779 | 6.8445378  | -4.3428355 | H | 0.6314826  | 15.241065    | 5.2517456  |
| O                                                             | 1.0463334  | 3.7447429  | -2.4339844 | H | 0.5472669  | 14.407324    | 3.6837281  |
| O                                                             | -1.9095678 | 11.188996  | 2.7729807  | H | -0.8911803 | 15.16915     | 4.3440496  |
| C                                                             | 1.2793431  | 0.7915135  | -2.2530027 | H | -0.0005611 | 11.218175    | 9.1210206  |
| C                                                             | 1.6709512  | -0.5432966 | -2.3833557 | H | -1.9605366 | 10.09806     | 4.0394882  |
| <b>NImag</b>                                                  |            |            |            |   |            | 0            |            |
| <b><math>\Sigma</math> Electronic and thermal Free Energy</b> |            |            |            |   |            | -1865688.773 |            |
| <b>mol Fraction</b>                                           |            |            |            |   |            | 7.11E-11     |            |

**(8S, 13S, 8aS, 12aS, 13aS)-Diazaphilonic acid (2) - Conformer 42**

| Atom | X          | Y         | Z          | Atom | X          | Y          | Z          |
|------|------------|-----------|------------|------|------------|------------|------------|
| C    | 2.0760665  | 7.1112468 | -1.8237901 | C    | 2.3832152  | -1.0498252 | -2.2339225 |
| C    | 0.7557916  | 7.4010492 | -1.6512448 | C    | 1.9944699  | -0.588006  | -0.9743231 |
| C    | -0.1403868 | 6.5241673 | -0.9073669 | C    | 1.7737374  | 0.7695398  | -0.7462788 |
| C    | 0.3517629  | 5.2633016 | -0.2956363 | C    | -1.6393032 | 11.631986  | 5.9725814  |
| C    | 1.8762326  | 5.0404051 | -0.291809  | C    | -0.9773318 | 11.800715  | 7.1833007  |
| C    | 2.6840115  | 5.893345  | -1.3119529 | C    | 0.1735185  | 12.600791  | 7.2630468  |
| C    | 0.1041146  | 8.5670967 | -2.2185743 | C    | 0.6823034  | 13.228458  | 6.1335533  |
| C    | -1.218425  | 8.7819047 | -2.0738864 | C    | 0.0320209  | 13.080334  | 4.9047479  |
| O    | -2.0138216 | 7.9310295 | -1.3417828 | C    | 1.3543001  | 1.1934975  | 0.6448602  |
| C    | -1.4512047 | 6.8296572 | -0.792961  | O    | 2.4591935  | 2.0985209  | -4.0982588 |
| C    | -2.0120779 | 9.8969243 | -2.7221935 | O    | 2.5903819  | -2.3899713 | -2.3725613 |
| C    | -3.09172   | 10.44991  | -1.8056368 | C    | -2.8741226 | 10.760604  | 5.9271235  |
| C    | -4.3891528 | 10.124962 | -2.0279328 | O    | 0.8428264  | 12.782026  | 8.4368569  |
| C    | -4.9442688 | 9.2738084 | -3.1276358 | O    | 0.6327572  | 13.679298  | 3.8569062  |
| C    | -3.8713846 | 8.6063906 | -4.0017902 | H    | 2.7198292  | 7.758122   | -2.4124118 |
| C    | -2.5936985 | 9.4646131 | -4.1065621 | H    | 0.6888312  | 9.271003   | -2.8028028 |
| C    | -2.729352  | 11.31667  | -0.687185  | H    | -2.1701233 | 6.2185971  | -0.2621924 |
| C    | -3.8527085 | 11.784175 | 0.1102616  | H    | -1.2941927 | 10.695937  | -2.9279713 |
| C    | -5.1104798 | 11.401649 | -0.2001556 | H    | -5.5835903 | 9.9102499  | -3.7502177 |
| O    | -5.4075071 | 10.598467 | -1.2390193 | H    | -5.5855373 | 8.5036513  | -2.6862933 |
| C    | -1.4392478 | 11.661614 | -0.373142  | H    | -4.2757446 | 8.5268305  | -5.0187392 |
| C    | -1.120382  | 12.469227 | 0.7789535  | H    | -1.8151052 | 8.8945451  | -4.6242283 |
| C    | -2.2523952 | 13.255151 | 1.4784846  | H    | -5.9848505 | 11.706104  | 0.3612645  |
| C    | -3.6648871 | 12.678721 | 1.2868743  | H    | -0.5900677 | 11.256455  | -0.9098473 |
| O    | -1.9151563 | 13.365691 | 2.8623822  | H    | -2.4898678 | 14.710261  | -0.1323274 |
| C    | -1.8741237 | 12.172132 | 3.5412551  | H    | -3.0130652 | 15.27338   | 1.4768817  |
| C    | -1.1570376 | 12.302162 | 4.8196257  | H    | -1.2719966 | 15.143044  | 1.0927568  |
| C    | -2.2575135 | 14.696077 | 0.937515   | H    | 2.2533858  | 6.4155301  | 1.3579098  |
| O    | 2.150179   | 3.6466234 | -0.4997287 | H    | 1.8870913  | 4.7427957  | 1.85226    |
| C    | 1.6615455  | 3.1437935 | -1.6653054 | H    | 3.4798256  | 5.1452465  | 1.1390273  |
| C    | 1.9255926  | 1.6898207 | -1.8141006 | H    | -2.0414254 | 12.233273  | -5.6593459 |
| C    | 2.4081303  | 5.3590961 | 1.1146446  | H    | -2.4274718 | 5.7236714  | -3.8909542 |
| O    | -0.3995631 | 4.4668834 | 0.2426605  | H    | 2.8440128  | -0.5104971 | -4.2772158 |
| O    | 3.8271465  | 5.5548103 | -1.5847327 | H    | 1.8648205  | -1.3100518 | -0.1751392 |
| O    | -4.5926414 | 13.033523 | 1.9901018  | H    | -1.3575081 | 11.310575  | 8.0774433  |
| O    | 0.0284417  | 12.606689 | 1.2069442  | H    | 1.5922425  | 13.814284  | 6.1886206  |

|                                                               |            |            |            |   |            |              |            |
|---------------------------------------------------------------|------------|------------|------------|---|------------|--------------|------------|
| C                                                             | -2.8699373 | 10.683759  | -4.9873318 | H | 0.9976939  | 0.326024     | 1.2081461  |
| C                                                             | -3.6194211 | 7.1577015  | -3.5825238 | H | 2.1998126  | 1.6278971    | 1.1893103  |
| O                                                             | -3.8980001 | 10.900297  | -5.589662  | H | 0.5668946  | 1.9513448    | 0.6309466  |
| O                                                             | -1.7951848 | 11.50159   | -5.0617691 | H | 2.792716   | 1.6305797    | -4.8793508 |
| O                                                             | -2.5060836 | 6.657499   | -4.1664065 | H | 2.8514046  | -2.5814388   | -3.2868251 |
| O                                                             | -4.3473954 | 6.4981796  | -2.8772408 | H | -3.1595914 | 10.451252    | 6.9370001  |
| O                                                             | 1.0710112  | 3.8477939  | -2.4637996 | H | -3.7248209 | 11.281167    | 5.4746291  |
| O                                                             | -2.3879947 | 11.169932  | 3.0759685  | H | -2.7026368 | 9.8649661    | 5.3224139  |
| C                                                             | 2.3020771  | 1.2047696  | -3.0854611 | H | 0.3937314  | 12.279577    | 9.1345167  |
| C                                                             | 2.5404068  | -0.1562583 | -3.2926355 | H | 0.2387142  | 13.417298    | 2.9969069  |
| <b>NImag</b>                                                  |            |            |            |   |            | 0            |            |
| <b><math>\Sigma</math> Electronic and thermal Free Energy</b> |            |            |            |   |            | -1865686.824 |            |
| <b>mol Fraction</b>                                           |            |            |            |   |            | 2.64E-12     |            |

**(8S, 13S, 8aS, 12aS, 13aS)-Diazaphilonic acid (2) - Conformer 43**

| Atom | X          | Y         | Z          | Atom | X          | Y         | Z          |
|------|------------|-----------|------------|------|------------|-----------|------------|
| C    | 2.6971574  | 6.4159281 | -1.1834397 | C    | 1.4170991  | 1.0030451 | -5.182302  |
| C    | 1.4052814  | 6.8032004 | -0.9425129 | C    | 2.4583471  | 0.8775858 | -4.2509798 |
| C    | 0.5635453  | 6.1398103 | 0.0371197  | C    | 2.4175477  | 1.5317496 | -3.0269638 |
| C    | 1.0498804  | 4.9383028 | 0.7708867  | C    | -2.0659582 | 12.159147 | 6.1548781  |
| C    | 2.3882186  | 4.3039966 | 0.2776715  | C    | -1.5559065 | 12.575301 | 7.3769874  |
| C    | 3.3041928  | 5.2682494 | -0.5507732 | C    | -0.5286893 | 13.529325 | 7.4295792  |
| C    | 0.7575778  | 7.8913168 | -1.6411533 | C    | 0.0048288  | 14.065048 | 6.2637366  |
| C    | -0.5355756 | 8.2095043 | -1.413843  | C    | -0.4969528 | 13.667975 | 5.0182382  |
| O    | -1.2706143 | 7.576757  | -0.4504561 | C    | 3.5938083  | 1.3376026 | -2.096051  |
| C    | -0.7008493 | 6.5645718 | 0.2436253  | O    | -0.885791  | 3.191507  | -3.4586379 |
| C    | -1.3319445 | 9.2340023 | -2.2026303 | O    | 1.5537529  | 0.3275679 | -6.3517594 |
| C    | -2.5438374 | 9.7436007 | -1.4480929 | C    | -3.1706039 | 11.126951 | 6.1358572  |
| C    | -3.7489275 | 9.1805404 | -1.70502   | O    | -0.0793421 | 13.885361 | 8.6662106  |
| C    | -4.0455353 | 8.0601851 | -2.6516239 | O    | 0.1268252  | 14.203613 | 3.9494487  |
| C    | -2.8799703 | 7.6567109 | -3.5791305 | H    | 3.3213227  | 6.9668915 | -1.8807984 |
| C    | -1.7441156 | 8.7034083 | -3.6138124 | H    | 1.3050428  | 8.4348526 | -2.4052376 |
| C    | -2.4131992 | 10.797665 | -0.4499247 | H    | -1.3821825 | 6.1161094 | 0.954287   |
| C    | -3.6642119 | 11.195826 | 0.1763718  | H    | -0.657996  | 10.076018 | -2.3848156 |
| C    | -4.8177829 | 10.57772  | -0.1597642 | H    | -4.9154223 | 8.3563257 | -3.2473606 |
| O    | -4.8954457 | 9.5917002 | -1.0740858 | H    | -4.3446032 | 7.1869104 | -2.0585975 |
| C    | -1.2174507 | 11.363569 | -0.0854945 | H    | -3.26417   | 7.601114  | -4.6022898 |
| C    | -1.1277544 | 12.358582 | 0.9539979  | H    | -0.8586415 | 8.2575782 | -4.0795214 |
| C    | -2.4198977 | 13.061122 | 1.4304248  | H    | -5.7765985 | 10.820031 | 0.2811023  |
| C    | -3.7192118 | 12.268143 | 1.209037   | H    | -0.271979  | 11.015187 | -0.4852262 |
| O    | -2.2454445 | 13.404573 | 2.806286   | H    | -2.6759007 | 14.235863 | -0.3921229 |
| C    | -2.1241471 | 12.330486 | 3.6553147  | H    | -3.4318712 | 14.930333 | 1.066018   |
| C    | -1.5617031 | 12.729882 | 4.9547197  | H    | -1.6581261 | 15.000474 | 0.8531683  |
| C    | -2.5557736 | 14.399924 | 0.6837306  | H    | 3.3843405  | 4.4847939 | 2.1778294  |
| O    | 2.1864826  | 3.1853825 | -0.6685839 | H    | 2.5201617  | 2.9542634 | 1.9472104  |
| C    | 1.1313992  | 3.1436144 | -1.4902957 | H    | 4.0730201  | 3.2604789 | 1.0938482  |
| C    | 1.2808303  | 2.3386775 | -2.7082995 | H    | -1.4983216 | 11.506539 | -5.1803205 |
| C    | 3.1423147  | 3.7020045 | 1.4521599  | H    | -1.2404327 | 4.9059072 | -4.0445135 |
| O    | 0.4863211  | 4.5056645 | 1.7577423  | H    | -0.521873  | 1.890437  | -5.594944  |
| O    | 4.4815517  | 4.9579891 | -0.7050598 | H    | 3.3063946  | 0.2539884 | -4.5121734 |
| O    | -4.7543792 | 12.585352 | 1.7648292  | H    | -1.9426424 | 12.173397 | 8.3074262  |
| O    | -0.0575244 | 12.719698 | 1.4512295  | H    | 0.8278276  | 14.774351 | 6.2841898  |

|                                                               |            |           |            |   |            |              |            |
|---------------------------------------------------------------|------------|-----------|------------|---|------------|--------------|------------|
| C                                                             | -2.1528586 | 9.8751824 | -4.5075558 | H | 4.2991696  | 0.6275475    | -2.53639   |
| C                                                             | -2.3568206 | 6.2477776 | -3.2799498 | H | 4.1185824  | 2.278008     | -1.9036973 |
| O                                                             | -3.2028675 | 9.9790951 | -5.1003098 | H | 3.2790116  | 0.9520369    | -1.1216605 |
| O                                                             | -1.1707661 | 10.802636 | -4.5885498 | H | -0.8551196 | 3.4976226    | -2.5068576 |
| O                                                             | -1.5036103 | 5.8420819 | -4.2342077 | H | 0.7743451  | 0.4844122    | -6.9084063 |
| O                                                             | -2.6910808 | 5.5628399 | -2.3350895 | H | -3.5104432 | 10.916848    | 7.1540041  |
| O                                                             | 0.0980429  | 3.7761964 | -1.2309488 | H | -4.0319691 | 11.461451    | 5.5477157  |
| O                                                             | -2.458294  | 11.213612 | 3.3008779  | H | -2.8289675 | 10.192386    | 5.6805928  |
| C                                                             | 0.2298032  | 2.4421803 | -3.6694931 | H | 0.6241296  | 14.546112    | 8.5666497  |
| C                                                             | 0.3030209  | 1.7852281 | -4.8959013 | H | -0.1401301 | 13.777394    | 3.1057399  |
| <b>NImag</b>                                                  |            |           |            |   |            | 0            |            |
| <b><math>\Sigma</math> Electronic and thermal Free Energy</b> |            |           |            |   |            | -1865694.988 |            |
| <b>mol Fraction</b>                                           |            |           |            |   |            | 2.59E-06     |            |

**Data S2.** Lowest energy conformer 3D structure, all overlaid 3D structures, cartesian coordinates, number of imaginary frequencies, and energy for (8*S*, 13*R*, 8*aS*, 12*aR*, 13*aR*)-Diazaphilonic acid conformers.

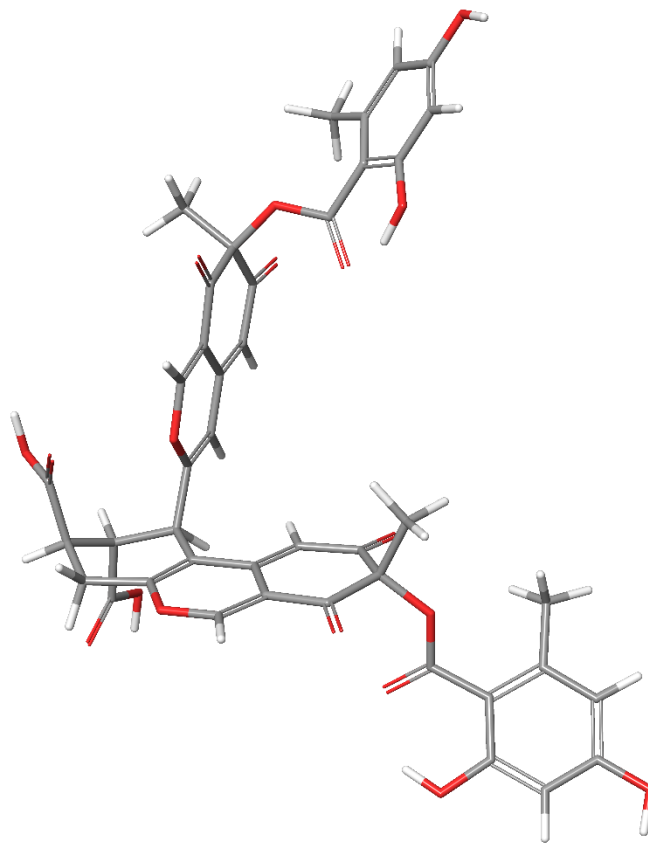

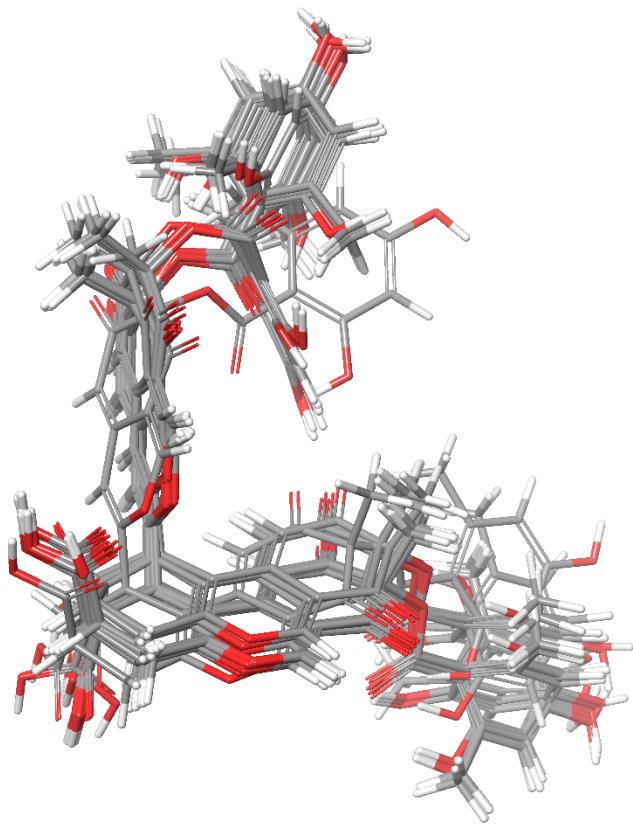



**(8S, 13R, 8aS, 12aR, 13aR)-Diazaphilonic acid - Conformer 1**

| Atom | X          | Y          | Z          | Atom | X          | Y          | Z          |
|------|------------|------------|------------|------|------------|------------|------------|
| C    | -3.0182255 | -4.5273796 | -5.2433298 | C    | -10.413137 | -3.331551  | -8.2974464 |
| C    | -2.9644178 | -3.904529  | -4.030264  | C    | -9.9999744 | -4.6507734 | -8.0492968 |
| C    | -4.1180593 | -3.8299586 | -3.142977  | C    | -8.8642951 | -4.9183669 | -7.2998305 |
| C    | -5.4168946 | -4.4530021 | -3.5123159 | C    | 0.1403582  | 6.0749395  | -5.8745651 |
| C    | -5.4144464 | -5.3535686 | -4.7635454 | C    | 0.8378934  | 7.1145717  | -6.4714178 |
| C    | -4.2318101 | -5.1408602 | -5.7515177 | C    | 2.1266424  | 7.4677903  | -6.0397242 |
| C    | -1.7792906 | -3.2439839 | -3.5160769 | C    | 2.7480079  | 6.7662227  | -5.016295  |
| C    | -1.7731368 | -2.6207479 | -2.3202341 | C    | 2.0771799  | 5.7028529  | -4.4045006 |
| O    | -2.8998699 | -2.5650217 | -1.5322266 | C    | -8.4802156 | -6.369969  | -7.1159526 |
| C    | -4.0274524 | -3.1727169 | -1.9658872 | O    | -7.8484401 | -1.4061757 | -6.6606822 |
| C    | -0.5837537 | -1.94456   | -1.6745764 | O    | -11.544937 | -3.1719433 | -9.0340148 |
| C    | -0.9355561 | -0.5752729 | -1.11303   | C    | -1.2279106 | 5.7485974  | -6.4309682 |
| C    | -1.0501936 | -0.4103346 | 0.2262085  | O    | 2.7246844  | 8.5075706  | -6.6804612 |
| C    | -0.8324864 | -1.4327742 | 1.297952   | O    | 2.748562   | 5.0570957  | -3.4380004 |
| C    | -0.5878895 | -2.8537685 | 0.768511   | H    | -2.1594098 | -4.5342171 | -5.9078476 |
| C    | 0.1090694  | -2.85241   | -0.6087858 | H    | -0.8699603 | -3.2482975 | -4.1087768 |
| C    | -1.1458018 | 0.5556089  | -2.019034  | H    | -4.8477736 | -3.07149   | -1.2663249 |
| C    | -1.4580674 | 1.8135769  | -1.3542167 | H    | 0.146339   | -1.8058595 | -2.4766108 |
| C    | -1.5419107 | 1.8698758  | -0.0080188 | H    | -1.7005977 | -1.4356774 | 1.9652652  |
| O    | -1.3551594 | 0.8032262  | 0.7944526  | H    | 0.0298843  | -1.1093611 | 1.8923931  |
| C    | -1.0316722 | 0.4847956  | -3.3791557 | H    | 0.1060558  | -3.3482316 | 1.4601532  |
| C    | -1.1744054 | 1.6420825  | -4.2462589 | H    | 0.1283687  | -3.8724479 | -1.0075636 |
| C    | -1.7868928 | 2.9352817  | -3.6478424 | H    | -1.7643743 | 2.7758681  | 0.5415515  |
| C    | -1.6735444 | 3.0709979  | -2.1190212 | H    | -0.7718529 | -0.4350905 | -3.8885468 |
| O    | -1.2037145 | 4.081411   | -4.2878791 | H    | -3.8111823 | 2.1324181  | -3.5704116 |
| C    | 0.1135356  | 4.2595252  | -4.0668132 | H    | -3.7160515 | 3.9100186  | -3.6559522 |
| C    | 0.7487364  | 5.351293   | -4.8009788 | H    | -3.3764514 | 2.9155147  | -5.1065733 |
| C    | -3.2779763 | 2.976559   | -4.0196784 | H    | -4.4650783 | -7.0251571 | -3.7393417 |
| O    | -6.6558284 | -5.2088917 | -5.4719879 | H    | -6.2456644 | -7.0067612 | -3.6457599 |
| C    | -6.9099567 | -3.9708926 | -5.9420134 | H    | -5.4244304 | -7.4716484 | -5.1684384 |
| C    | -8.1027582 | -3.8283264 | -6.7723376 | H    | 3.1441951  | -2.1201478 | -1.4141349 |
| C    | -5.3860016 | -6.8167484 | -4.2942039 | H    | -2.5092905 | -5.3969995 | 0.3300953  |
| O    | -6.4134905 | -4.3455482 | -2.8206137 | H    | -9.9645024 | -1.2273717 | -8.0141083 |
| O    | -4.3431173 | -5.5679899 | -6.8934936 | H    | -10.5883   | -5.4604013 | -8.4674015 |

|   |            |            |            |   |            |            |            |
|---|------------|------------|------------|---|------------|------------|------------|
| O | -1.8435348 | 4.1455893  | -1.5716612 | H | 0.4006108  | 7.6719351  | -7.2927225 |
| O | -0.9042633 | 1.6160987  | -5.4400168 | H | 3.7518646  | 7.0066588  | -4.6776086 |
| C | 1.5755207  | -2.4513902 | -0.4281292 | H | -9.1255171 | -7.0033172 | -7.7313419 |
| C | -1.8487107 | -3.7105726 | 0.836889   | H | -7.4389191 | -6.5480332 | -7.3992826 |
| O | 2.1271244  | -2.2668808 | 0.6338744  | H | -8.5824429 | -6.6849557 | -6.0727873 |
| O | 2.220191   | -2.3652485 | -1.6124837 | H | -7.0318993 | -1.723112  | -6.1978165 |
| O | -1.6941625 | -4.8835133 | 0.1733233  | H | -11.720798 | -2.2238885 | -9.1441043 |
| O | -2.8479102 | -3.445797  | 1.464303   | H | -1.411016  | 6.3408744  | -7.3319924 |
| O | -6.1554096 | -3.035114  | -5.6342111 | H | -1.315395  | 4.6880707  | -6.6837128 |
| O | 0.7023657  | 3.5266147  | -3.2564606 | H | -2.0198693 | 5.9674495  | -5.7080693 |
| C | -8.5192501 | -2.4931718 | -7.0719235 | H | 3.605702   | 8.6504858  | -6.2994324 |
| C | -9.6781771 | -2.2567645 | -7.8177425 | H | 2.1738945  | 4.3091232  | -3.1339909 |

---

**NImag**

0

**$\Sigma$  Electronic and thermal Free Energy**

-1865700.806

**mol Fraction**

0.316019856

---

**(8S, 13R, 8aS, 12aR, 13aR)-Diazaphilonic acid - Conformer 2**

| Atom | X          | Y          | Z          | Atom | X          | Y          | Z          |
|------|------------|------------|------------|------|------------|------------|------------|
| C    | -3.2661341 | -4.3209472 | -5.1564009 | C    | -10.833947 | -2.8860571 | -7.62865   |
| C    | -3.1179577 | -3.7554674 | -3.9232544 | C    | -10.42605  | -4.2206963 | -7.4705569 |
| C    | -4.2059173 | -3.706227  | -2.9549335 | C    | -9.2457482 | -4.537768  | -6.8152475 |
| C    | -5.5374752 | -4.2939145 | -3.2601289 | C    | 0.0170428  | 6.2557943  | -5.5295167 |
| C    | -5.6368326 | -5.135788  | -4.5477503 | C    | 0.6885493  | 7.3124943  | -6.1262409 |
| C    | -4.5221626 | -4.893748  | -5.6055156 | C    | 2.0099205  | 7.6279984  | -5.7706563 |
| C    | -1.8891555 | -3.1354536 | -3.4640456 | C    | 2.689243   | 6.8714997  | -4.8262374 |
| C    | -1.7897157 | -2.568096  | -2.2447368 | C    | 2.0450104  | 5.790057   | -4.2175439 |
| O    | -2.8580387 | -2.5334838 | -1.3780864 | C    | -8.8733959 | -6.001233  | -6.7253148 |
| C    | -4.0229713 | -3.1052039 | -1.758684  | O    | -8.1311522 | -1.072799  | -6.0889056 |
| C    | -0.5472913 | -1.9385603 | -1.6541285 | O    | -12.011267 | -2.6775114 | -8.2762629 |
| C    | -0.8364249 | -0.5918908 | -1.0084122 | C    | -1.3918859 | 5.9740471  | -6.0025454 |
| C    | -0.8552609 | -0.4871493 | 0.3416219  | O    | 2.5791188  | 8.6882201  | -6.4041221 |
| C    | -0.5807622 | -1.5606025 | 1.3484749  | O    | 2.7712419  | 5.0912935  | -3.3308747 |
| C    | -0.3974027 | -2.9589638 | 0.7399269  | H    | -2.4556864 | -4.3088048 | -5.8790524 |
| C    | 0.2023841  | -2.9037561 | -0.6812939 | H    | -1.0232769 | -3.1248171 | -4.1185197 |
| C    | -1.0900147 | 0.5821649  | -1.8457915 | H    | -4.7910373 | -3.0252038 | -0.9995819 |
| C    | -1.3345274 | 1.8123322  | -1.1049193 | H    | 0.1277051  | -1.7730322 | -2.4982313 |
| C    | -1.3240124 | 1.8078291  | 0.2450075  | H    | -1.4003045 | -1.5823688 | 2.0742885  |
| O    | -1.0999093 | 0.7029905  | 0.9837352  | H    | 0.3261619  | -1.2766068 | 1.8948119  |
| C    | -1.0714897 | 0.5724496  | -3.2123661 | H    | 0.3343841  | -3.4941328 | 1.3583895  |
| C    | -1.2546421 | 1.7702086  | -4.0144936 | H    | 0.1768916  | -3.9045638 | -1.1258467 |
| C    | -1.8026681 | 3.0426315  | -3.3172167 | H    | -1.4927777 | 2.6905118  | 0.8489322  |
| C    | -1.5814086 | 3.1063882  | -1.7955309 | H    | -0.8628876 | -0.3264469 | -3.77951   |
| O    | -1.2463674 | 4.2090478  | -3.944369  | H    | -3.8297088 | 2.264155   | -3.1344324 |
| C    | 0.0858232  | 4.3591733  | -3.8083212 | H    | -3.7113706 | 4.0423913  | -3.1464423 |
| C    | 0.686521   | 5.4750952  | -4.535182  | H    | -3.4896144 | 3.1111893  | -4.6605112 |
| C    | -3.3150659 | 3.1208748  | -3.5815291 | H    | -4.6466727 | -6.8654108 | -3.668835  |
| O    | -6.9217334 | -4.9418897 | -5.1602983 | H    | -6.4159396 | -6.8273587 | -3.4500535 |
| C    | -7.187237  | -3.6801989 | -5.5550746 | H    | -5.7101161 | -7.2326336 | -5.0458974 |
| C    | -8.4320208 | -3.4835519 | -6.2928971 | H    | 3.1862838  | -2.1763985 | -1.6632639 |
| C    | -5.6002632 | -6.6192989 | -4.1478958 | H    | -2.3871597 | -5.4527905 | 0.3231193  |
| O    | -6.4817694 | -4.205053  | -2.4961844 | H    | -10.332648 | -0.803411  | -7.2815642 |
| O    | -4.7195708 | -5.2660598 | -6.7550203 | H    | -11.054904 | -5.0021858 | -7.8831801 |
| O    | -1.6953547 | 4.1568438  | -1.1898894 | H    | 0.2044858  | 7.913143   | -6.8886836 |
| O    | -1.0681244 | 1.7955581  | -5.2241495 | H    | 3.7180988  | 7.0824779  | -4.5483974 |

|                                                               |            |            |            |   |            |              |            |
|---------------------------------------------------------------|------------|------------|------------|---|------------|--------------|------------|
| C                                                             | 1.6843792  | -2.5315077 | -0.585838  | H | -9.5695001 | -6.5965896   | -7.3230164 |
| C                                                             | -1.6647249 | -3.8006717 | 0.8577832  | H | -7.8569752 | -6.1792456   | -7.0879036 |
| O                                                             | 2.3113176  | -2.4039547 | 0.4421916  | H | -8.9089788 | -6.3635186   | -5.6931524 |
| O                                                             | 2.2467456  | -2.3994018 | -1.8073004 | H | -7.289782  | -1.421633    | -5.6992566 |
| O                                                             | -1.576305  | -4.9438296 | 0.1329701  | H | -12.178928 | -1.7231404   | -8.3303399 |
| O                                                             | -2.6134642 | -3.5513704 | 1.5648105  | H | -1.6273984 | 6.6099317    | -6.8606561 |
| O                                                             | -6.3978578 | -2.7698045 | -5.2587792 | H | -1.5144231 | 4.9276735    | -6.2963802 |
| O                                                             | 0.7172136  | 3.5818378  | -3.0750851 | H | -2.1278309 | 6.1697132    | -5.216555  |
| C                                                             | -8.8464451 | -2.1305596 | -6.5014368 | H | 3.4867707  | 8.8015065    | -6.0798713 |
| C                                                             | -10.050197 | -1.8444963 | -7.1528813 | H | 2.2067922  | 4.3378153    | -3.0213492 |
| <b>NImag</b>                                                  |            |            |            |   |            | 0            |            |
| <b><math>\Sigma</math> Electronic and thermal Free Energy</b> |            |            |            |   |            | -1865700.802 |            |
| <b>mol Fraction</b>                                           |            |            |            |   |            | 0.314015801  |            |

**(8S, 13R, 8aS, 12aR, 13aR)-Diazaphilonic acid - Conformer 3**

| Atom | X          | Y          | Z          | Atom | X          | Y          | Z          |
|------|------------|------------|------------|------|------------|------------|------------|
| C    | -3.3511547 | -4.3330369 | -5.1472921 | C    | -10.418833 | -3.4526657 | -8.4460599 |
| C    | -3.1972557 | -3.7384242 | -3.9239046 | C    | -10.288613 | -2.4329078 | -7.4912749 |
| C    | -4.2898421 | -3.6296766 | -2.9677417 | C    | -9.2390113 | -2.4506641 | -6.5833803 |
| C    | -5.6343684 | -4.2033796 | -3.2568753 | C    | 0.2171931  | 6.123739   | -5.8408603 |
| C    | -5.7422216 | -5.0627737 | -4.5302967 | C    | 0.922149   | 7.1400185  | -6.4682557 |
| C    | -4.6270759 | -4.8456139 | -5.5831619 | C    | 2.2528729  | 7.4239656  | -6.120842  |
| C    | -1.9556487 | -3.1399115 | -3.4777032 | C    | 2.9073543  | 6.6755376  | -5.1527672 |
| C    | -1.8487163 | -2.533884  | -2.2763421 | C    | 2.2287976  | 5.6343042  | -4.5121749 |
| O    | -2.9205415 | -2.4405207 | -1.4231133 | C    | -9.1287503 | -1.332951  | -5.5711877 |
| C    | -4.0978049 | -2.9936821 | -1.7907941 | O    | -7.5638401 | -5.5504865 | -7.783502  |
| C    | -0.5923123 | -1.9206734 | -1.6980165 | O    | -11.47401  | -3.3638681 | -9.3038837 |
| C    | -0.8469725 | -0.5454427 | -1.1001043 | C    | -1.2001252 | 5.8737489  | -6.3066342 |
| C    | -0.8695189 | -0.3937966 | 0.2454149  | O    | 2.8555517  | 8.4456951  | -6.7855185 |
| C    | -0.6293211 | -1.4393699 | 1.2896873  | O    | 2.931977   | 4.9409486  | -3.6029862 |
| C    | -0.4871136 | -2.8626677 | 0.7301443  | H    | -2.5396269 | -4.3496104 | -5.8682531 |
| C    | 0.1218829  | -2.8749192 | -0.6882382 | H    | -1.0856013 | -3.1750802 | -4.1255909 |
| C    | -1.0633341 | 0.6053827  | -1.9791661 | H    | -4.8677384 | -2.8688447 | -1.0397187 |
| C    | -1.2780085 | 1.8665817  | -1.2826187 | H    | 0.092498   | -1.8033096 | -2.5423091 |
| C    | -1.2743732 | 1.9084519  | 0.0666242  | H    | -1.450463  | -1.4112321 | 2.0134172  |
| O    | -1.0841459 | 0.8238836  | 0.8444427  | H    | 0.2847913  | -1.164222  | 1.8285145  |
| C    | -1.0375778 | 0.5478689  | -3.3442705 | H    | 0.223942   | -3.399477  | 1.3709475  |
| C    | -1.1836906 | 1.7217805  | -4.1886654 | H    | 0.0683018  | -3.8893816 | -1.0980574 |
| C    | -1.7007929 | 3.0318726  | -3.5393295 | H    | -1.421856  | 2.8156367  | 0.6389704  |
| C    | -1.4858996 | 3.1421833  | -2.0193115 | H    | -0.8497029 | -0.3751134 | -3.8791279 |
| O    | -1.1095071 | 4.1604586  | -4.2023783 | H    | -3.7491952 | 2.3145068  | -3.343656  |
| C    | 0.225832   | 4.2779827  | -4.0637496 | H    | -3.582775  | 4.0876014  | -3.4150873 |
| C    | 0.8612783  | 5.3523612  | -4.8225289 | H    | -3.3775962 | 3.0996422  | -4.8951287 |
| C    | -3.2090356 | 3.1414731  | -3.815965  | H    | -4.7814912 | -6.792536  | -3.6073497 |
| O    | -6.9976414 | -4.8667691 | -5.1834825 | H    | -6.5528164 | -6.7164486 | -3.4073721 |
| C    | -7.2222247 | -3.582407  | -5.6194183 | H    | -5.8438211 | -7.1740486 | -4.9834861 |
| C    | -8.3114549 | -3.5280551 | -6.6057224 | H    | 3.1313291  | -2.2723341 | -1.677411  |
| C    | -5.7260491 | -6.5403601 | -4.1005659 | H    | -2.5510218 | -5.3073904 | 0.3880884  |
| O    | -6.5650882 | -4.107715  | -2.4788011 | H    | -9.558195  | -5.2654636 | -9.267606  |
| O    | -4.8651268 | -5.1724934 | -6.7481874 | H    | -11.023491 | -1.6350754 | -7.4769546 |
| O    | -1.5742553 | 4.2154845  | -1.4507668 | H    | 0.4575926  | 7.7326767  | -7.2488536 |
| O    | -0.9898005 | 1.6992915  | -5.3970438 | H    | 3.9421309  | 6.862384   | -4.8797185 |

|                                                               |            |            |            |   |            |              |            |
|---------------------------------------------------------------|------------|------------|------------|---|------------|--------------|------------|
| C                                                             | 1.6143499  | -2.5450329 | -0.5966745 | H | -10.005577 | -0.6817394   | -5.629214  |
| C                                                             | -1.7813501 | -3.6592926 | 0.867561   | H | -9.0509113 | -1.7150353   | -4.5476176 |
| O                                                             | 2.2395427  | -2.4028244 | 0.4303105  | H | -8.2321915 | -0.7304108   | -5.7457682 |
| O                                                             | 2.185899   | -2.4709863 | -1.8186913 | H | -6.7517948 | -5.4539499   | -7.2397093 |
| O                                                             | -1.7244612 | -4.8298563 | 0.184216   | H | -11.451693 | -4.121666    | -9.9094113 |
| O                                                             | -2.7269695 | -3.354469  | 1.5566278  | H | -1.4163688 | 6.4943156    | -7.1808465 |
| O                                                             | -6.5551295 | -2.6552022 | -5.1943064 | H | -1.3552042 | 4.8245147    | -6.5737499 |
| O                                                             | 0.831303   | 3.5068604  | -3.3024195 | H | -1.9291682 | 6.112157     | -5.5260831 |
| C                                                             | -8.4322296 | -4.5356628 | -7.6001752 | H | 3.7662431  | 8.5402243    | -6.4637773 |
| C                                                             | -9.4962575 | -4.4896901 | -8.5092308 | H | 2.3433876  | 4.2165654    | -3.2699508 |
| <b>NImag</b>                                                  |            |            |            |   |            | 0            |            |
| <b><math>\Sigma</math> Electronic and thermal Free Energy</b> |            |            |            |   |            | -1865698.239 |            |
| <b>mol Fraction</b>                                           |            |            |            |   |            | 0.004129507  |            |

**(8S, 13R, 8aS, 12aR, 13aR)-Diazaphilonic acid – Conformer 4**

| Atom | X          | Y          | Z          | Atom | X          | Y          | Z          |
|------|------------|------------|------------|------|------------|------------|------------|
| C    | -3.2733362 | -4.3121147 | -5.1640376 | C    | -10.228403 | -3.3963948 | -8.6847266 |
| C    | -3.1540866 | -3.7154356 | -3.937783  | C    | -10.122071 | -2.3753309 | -7.7283863 |
| C    | -4.2753524 | -3.5977059 | -3.0165083 | C    | -9.1016922 | -2.3974222 | -6.7878484 |
| C    | -5.6136703 | -4.1639671 | -3.3462086 | C    | 0.3770406  | 6.1222774  | -5.7695857 |
| C    | -5.686961  | -5.025774  | -4.6204786 | C    | 1.1074501  | 7.1326863  | -6.3770234 |
| C    | -4.5381291 | -4.818014  | -5.6383988 | C    | 2.4288759  | 7.4085491  | -5.9898578 |
| C    | -1.923395  | -3.1233566 | -3.4543332 | C    | 3.0486199  | 6.657808   | -5.0009513 |
| C    | -1.8503635 | -2.5149803 | -2.2516157 | C    | 2.3439961  | 5.6223642  | -4.3793812 |
| O    | -2.9477433 | -2.4130134 | -1.4325564 | C    | -9.0165561 | -1.2781169 | -5.7749954 |
| C    | -4.1162962 | -2.9599629 | -1.8355875 | O    | -7.4087076 | -5.5101334 | -7.9281943 |
| C    | -0.6089121 | -1.9079025 | -1.6357154 | O    | -11.255471 | -3.3031012 | -9.575559  |
| C    | -0.8737618 | -0.5295669 | -1.0494569 | C    | -1.0271648 | 5.8809259  | -6.277677  |
| C    | -0.9372656 | -0.3741485 | 0.294329   | O    | 3.0582297  | 8.4249444  | -6.6377727 |
| C    | -0.7358529 | -1.4182875 | 1.348191   | O    | 3.0145666  | 4.9263441  | -3.4478919 |
| C    | -0.5852588 | -2.8439504 | 0.7969264  | H    | -2.4398051 | -4.3353982 | -5.859249  |
| C    | 0.0674938  | -2.8637648 | -0.6017849 | H    | -1.0337363 | -3.1654273 | -4.0745868 |
| C    | -1.0557309 | 0.6201302  | -1.9377361 | H    | -4.9085416 | -2.8286071 | -1.1092362 |
| C    | -1.2845232 | 1.8844387  | -1.2513673 | H    | 0.1026567  | -1.7968978 | -2.458462  |
| C    | -1.3226388 | 1.9299404  | 0.0972182  | H    | -1.5787407 | -1.3831695 | 2.0461534  |
| O    | -1.1631691 | 0.8463679  | 0.8833188  | H    | 0.1629091  | -1.1472612 | 1.9142512  |
| C    | -0.9877151 | 0.558849   | -3.3012125 | H    | 0.102151   | -3.3834294 | 1.4608511  |
| C    | -1.1004691 | 1.7313427  | -4.1527059 | H    | 0.0203643  | -3.8789924 | -1.0105161 |
| C    | -1.6297591 | 3.0461772  | -3.5230717 | H    | -1.482496  | 2.8395087  | 0.6624116  |
| C    | -1.4617475 | 3.159264   | -1.9973704 | H    | -0.7887088 | -0.3666231 | -3.8276786 |
| O    | -1.0114431 | 4.169557   | -4.1700791 | H    | -3.6874457 | 2.3412122  | -3.3897013 |
| C    | 0.3195645  | 4.2798062  | -3.9899092 | H    | -3.5084727 | 4.1131336  | -3.4602066 |
| C    | 0.9847587  | 5.348624   | -4.7308115 | H    | -3.2629954 | 3.1201336  | -4.9307143 |
| C    | -3.1279748 | 3.1638094  | -3.846915  | H    | -4.7662298 | -6.7590673 | -3.6640688 |
| O    | -6.9200936 | -4.8236772 | -5.3130835 | H    | -6.5424471 | -6.6717334 | -3.5197363 |
| C    | -7.1231376 | -3.5390782 | -5.7586199 | H    | -5.7873476 | -7.1374694 | -5.0718924 |
| C    | -8.1805253 | -3.4804685 | -6.7787568 | H    | 3.1099763  | -2.2821668 | -1.4981971 |
| C    | -5.6933523 | -6.5023767 | -4.1871311 | H    | -2.6528964 | -5.2766531 | 0.3967719  |
| O    | -6.5676168 | -4.0608889 | -2.5977724 | H    | -9.3535363 | -5.2162656 | -9.4749895 |
| O    | -4.7416819 | -5.1463083 | -6.8095682 | H    | -10.852163 | -1.5730566 | -7.7387848 |
| O    | -1.5610401 | 4.2346314  | -1.4345607 | H    | 0.6707361  | 7.7269084  | -7.1723664 |
| O    | -0.8690248 | 1.704496   | -5.3543507 | H    | 4.0758035  | 6.8384281  | -4.6968143 |

|                                                               |            |            |            |   |            |              |            |
|---------------------------------------------------------------|------------|------------|------------|---|------------|--------------|------------|
| C                                                             | 1.5584457  | -2.5428805 | -0.4645952 | H | -9.8875013 | -0.622185    | -5.8614929 |
| C                                                             | -1.8881765 | -3.6320858 | 0.8959186  | H | -8.972557  | -1.6583348   | -4.7487288 |
| O                                                             | 2.1522669  | -2.4020753 | 0.5810356  | H | -8.1116667 | -0.6809247   | -5.9229702 |
| O                                                             | 2.1681657  | -2.4752851 | -1.6683798 | H | -6.6135705 | -5.4172365   | -7.3593662 |
| O                                                             | -1.817366  | -4.8048341 | 0.217659   | H | -11.218715 | -4.0623463   | -10.178566 |
| O                                                             | -2.8528967 | -3.3194771 | 1.5543377  | H | -1.2129322 | 6.5019288    | -7.1585596 |
| O                                                             | -6.4641271 | -2.6148452 | -5.3148171 | H | -1.1809667 | 4.8324431    | -6.5484291 |
| O                                                             | 0.8963694  | 3.5069433  | -3.2083456 | H | -1.7778371 | 6.1248842    | -5.5196569 |
| C                                                             | -8.276137  | -4.4895932 | -7.7744293 | H | 3.9593391  | 8.5141281    | -6.2886829 |
| C                                                             | -9.3107057 | -4.4391624 | -8.7166529 | H | 2.4112189  | 4.2066678    | -3.1314101 |
| <b>NImag</b>                                                  |            |            |            |   |            | 0            |            |
| <b><math>\Sigma</math> Electronic and thermal Free Energy</b> |            |            |            |   |            | -1865698.245 |            |
| <b>mol Fraction</b>                                           |            |            |            |   |            | 0.004173525  |            |



**(8S, 13R, 8aS, 12aR, 13aR)-Diazaphilonic acid - Conformer 5**

| Atom | X          | Y          | Z          | Atom | X          | Y          | Z          |
|------|------------|------------|------------|------|------------|------------|------------|
| C    | -2.9950428 | -4.5804942 | -5.2048153 | C    | -10.245523 | -3.1402332 | -8.4910316 |
| C    | -2.9362635 | -3.9150923 | -4.0146105 | C    | -9.9041037 | -4.4672836 | -8.1828488 |
| C    | -4.1047656 | -3.746833  | -3.1602953 | C    | -8.8015702 | -4.7601418 | -7.3943218 |
| C    | -5.4259426 | -4.3149339 | -3.5386612 | C    | -0.1375219 | 6.0214483  | -5.9293616 |
| C    | -5.4412379 | -5.263646  | -4.7534528 | C    | 0.4962572  | 7.069799   | -6.5798151 |
| C    | -4.2267564 | -5.150556  | -5.7192485 | C    | 1.8066073  | 7.4473211  | -6.2446651 |
| C    | -1.7308116 | -3.2972689 | -3.4950724 | C    | 2.5128764  | 6.7623049  | -5.2662298 |
| C    | -1.7180088 | -2.6339629 | -2.3207359 | C    | 1.9072093  | 5.6907783  | -4.6025535 |
| O    | -2.8585381 | -2.4909391 | -1.5634787 | C    | -8.4938324 | -6.2203635 | -7.1462111 |
| C    | -4.0067585 | -3.0506282 | -2.0064434 | O    | -7.6297127 | -1.2790698 | -6.8610777 |
| C    | -0.5047163 | -2.0112292 | -1.6656096 | O    | -11.349801 | -2.9546662 | -9.2626297 |
| C    | -0.8033747 | -0.6388584 | -1.0776852 | C    | -1.5365165 | 5.6681979  | -6.383621  |
| C    | -0.8079297 | -0.4620793 | 0.264139   | O    | 2.3384979  | 8.4937205  | -6.9318247 |
| C    | -0.511881  | -1.4846466 | 1.3185727  | O    | 2.6584562  | 5.0625715  | -3.6848482 |
| C    | -0.4637968 | -2.9168064 | 0.7763011  | H    | -2.1229428 | -4.656371  | -5.8473558 |
| C    | 0.1648116  | -2.9686177 | -0.637363  | H    | -0.8100417 | -3.3667821 | -4.0658084 |
| C    | -1.0687886 | 0.493269   | -1.9695716 | H    | -4.8387229 | -2.8767912 | -1.3353239 |
| C    | -1.3367649 | 1.7528881  | -1.2879489 | H    | 0.2364332  | -1.876528  | -2.4600887 |
| C    | -1.310391  | 1.817882   | 0.0598313  | H    | -1.2713537 | -1.4116438 | 2.1030277  |
| O    | -1.0545985 | 0.7563609  | 0.8505355  | H    | 0.449757   | -1.2295794 | 1.7835556  |
| C    | -1.0421375 | 0.4208255  | -3.3336209 | H    | 0.177903   | -3.5145197 | 1.4337798  |
| C    | -1.2534044 | 1.5757835  | -4.1910531 | H    | 0.07328    | -3.994562  | -1.0135738 |
| C    | -1.8420812 | 2.8620263  | -3.5545793 | H    | -1.4895332 | 2.7267856  | 0.6202114  |
| C    | -1.6192749 | 3.0056526  | -2.0389396 | H    | -0.8046995 | -0.4970913 | -3.8567773 |
| O    | -1.3280051 | 4.0144192  | -4.2397701 | H    | -3.8411167 | 2.0249089  | -3.3256911 |
| C    | -0.0009846 | 4.2161676  | -4.1161907 | H    | -3.7836182 | 3.8035336  | -3.4244736 |
| C    | 0.5597813  | 5.314508   | -4.8997813 | H    | -3.5341346 | 2.8079995  | -4.8924012 |
| C    | -3.3571521 | 2.8758918  | -3.8158867 | H    | -4.6019042 | -6.9382479 | -3.6417187 |
| O    | -6.6570462 | -5.0857627 | -5.4975378 | H    | -6.3810226 | -6.826985  | -3.5929854 |
| C    | -6.8368127 | -3.8564112 | -6.0218498 | H    | -5.5500968 | -7.3930583 | -5.0755995 |
| C    | -8.0004201 | -3.6885906 | -6.8881977 | H    | 3.2243453  | -3.0124941 | 0.3995318  |
| C    | -5.4981977 | -6.7063914 | -4.2267998 | H    | -2.707747  | -5.1923522 | 0.3996629  |
| O    | -6.4311884 | -4.1291247 | -2.8764938 | H    | -9.7006049 | -1.0508335 | -8.2753242 |
| O    | -4.3345    | -5.6166963 | -6.8462931 | H    | -10.521085 | -5.2631677 | -8.5857798 |
| O    | -1.7608207 | 4.0803486  | -1.4835766 | H    | -0.0092652 | 7.6147437  | -7.3697014 |
| O    | -1.0635037 | 1.5505513  | -5.3998059 | H    | 3.5345594  | 7.0213994  | -5.0029704 |

|                                                               |            |            |            |   |            |              |            |
|---------------------------------------------------------------|------------|------------|------------|---|------------|--------------|------------|
| C                                                             | 1.6739295  | -2.6955986 | -0.6130087 | H | -9.1535824 | -6.845235    | -7.7549388 |
| C                                                             | -1.8260987 | -3.6003077 | 0.8768964  | H | -7.4556358 | -6.4589402   | -7.3942077 |
| O                                                             | 2.296697   | -2.1564322 | -1.4981845 | H | -8.6378316 | -6.4896211   | -6.095184  |
| O                                                             | 2.2683862  | -3.1840802 | 0.5010611  | H | -6.8402831 | -1.6164179   | -6.3667314 |
| O                                                             | -1.8330095 | -4.7930545 | 0.2321999  | H | -11.475233 | -2.004198    | -9.4133945 |
| O                                                             | -2.7717584 | -3.195072  | 1.5114468  | H | -1.7948719 | 6.2520963    | -7.2716179 |
| O                                                             | -6.0440019 | -2.9475331 | -5.7307431 | H | -1.6231251 | 4.6049159    | -6.6247695 |
| O                                                             | 0.6575455  | 3.4986851  | -3.3474926 | H | -2.2778656 | 5.8772574    | -5.6061973 |
| C                                                             | -8.3429526 | -2.3474977 | -7.2485827 | H | 3.2429448  | 8.6519591    | -6.6176401 |
| C                                                             | -9.4704089 | -2.0844752 | -8.0328487 | H | 2.1231573  | 4.3037493    | -3.338652  |
| <b>NImag</b>                                                  |            |            |            |   |            | 0            |            |
| <b><math>\Sigma</math> Electronic and thermal Free Energy</b> |            |            |            |   |            | -1865699.737 |            |
| <b>mol Fraction</b>                                           |            |            |            |   |            | 0.051887123  |            |

**(8S, 13R, 8aS, 12aR, 13aR)-Diazaphilonic acid - Conformer 6**

| Atom | X          | Y          | Z          | Atom | X          | Y          | Z          |
|------|------------|------------|------------|------|------------|------------|------------|
| C    | -3.2665843 | -4.3107155 | -5.1538371 | C    | -10.82587  | -2.8520596 | -7.6439572 |
| C    | -3.1202176 | -3.7485973 | -3.9189091 | C    | -10.421178 | -4.1878265 | -7.4874115 |
| C    | -4.211049  | -3.6975583 | -2.9539134 | C    | -9.2430537 | -4.508617  | -6.829951  |
| C    | -5.5436784 | -4.2798658 | -3.2645656 | C    | 0.1160154  | 6.1899656  | -5.5358672 |
| C    | -5.6416179 | -5.1189843 | -4.5540736 | C    | 0.8071079  | 7.2337     | -6.1374132 |
| C    | -4.523284  | -4.8778529 | -5.6081668 | C    | 2.1188645  | 7.5604756  | -5.7531377 |
| C    | -1.8906899 | -3.1339258 | -3.4545309 | C    | 2.7731044  | 6.8266926  | -4.774997  |
| C    | -1.793176  | -2.5691658 | -2.2338458 | C    | 2.1120037  | 5.7594703  | -4.1637588 |
| O    | -2.8641717 | -2.53253   | -1.3705665 | C    | -8.874051  | -5.9730397 | -6.7418189 |
| C    | -4.0297938 | -3.0995434 | -1.7558792 | O    | -8.1225141 | -1.0473964 | -6.0949543 |
| C    | -0.550701  | -1.944465  | -1.6383064 | O    | -12.001319 | -2.6397797 | -8.2937973 |
| C    | -0.8375869 | -0.5975355 | -0.9920624 | C    | -1.2781919 | 5.8950305  | -6.0435369 |
| C    | -0.8604595 | -0.4942608 | 0.3580982  | O    | 2.7982674  | 8.5880154  | -6.3298557 |
| C    | -0.5934803 | -1.5699281 | 1.3645961  | O    | 2.8112169  | 5.0759642  | -3.2439833 |
| C    | -0.4124149 | -2.9681408 | 0.7549786  | H    | -2.4538421 | -4.2997972 | -5.8739253 |
| C    | 0.1926459  | -2.913011  | -0.6640075 | H    | -1.0226758 | -3.1250783 | -4.1061962 |
| C    | -1.0836916 | 0.5784085  | -1.8287894 | H    | -4.799939  | -3.0184528 | -0.9989994 |
| C    | -1.3247766 | 1.8088547  | -1.0875046 | H    | 0.1277235  | -1.7801281 | -2.4798832 |
| C    | -1.3190905 | 1.8027245  | 0.2624967  | H    | -1.4158736 | -1.5898233 | 2.0872421  |
| O    | -1.1025529 | 0.6960569  | 1.0005744  | H    | 0.3122671  | -1.2896037 | 1.9147591  |
| C    | -1.0616363 | 0.5694273  | -3.1955299 | H    | 0.315573   | -3.5062905 | 1.3753273  |
| C    | -1.234868  | 1.7685055  | -3.9969021 | H    | 0.1659181  | -3.9132232 | -1.1098326 |
| C    | -1.7738954 | 3.0453903  | -3.3008963 | H    | -1.4859442 | 2.6854639  | 0.8668667  |
| C    | -1.5639065 | 3.1047671  | -1.7772611 | H    | -0.8561572 | -0.3302592 | -3.762512  |
| O    | -1.1972538 | 4.2051993  | -3.9226855 | H    | -3.8115395 | 2.2923875  | -3.1342808 |
| C    | 0.1360456  | 4.3374326  | -3.7741682 | H    | -3.6706653 | 4.0688306  | -3.1438208 |
| C    | 0.7590137  | 5.4365264  | -4.5084266 | H    | -3.449541  | 3.1357612  | -4.6571997 |
| C    | -3.2828092 | 3.1428249  | -3.576973  | H    | -4.6583363 | -6.8527434 | -3.6755429 |
| O    | -6.9242987 | -4.9207228 | -5.1698415 | H    | -6.4281271 | -6.8106712 | -3.4617897 |
| C    | -7.1856642 | -3.6578433 | -5.5633271 | H    | -5.7187298 | -7.2147592 | -5.0563236 |
| C    | -8.4282781 | -3.4571155 | -6.3038374 | H    | 3.1818115  | -2.1902301 | -1.6339467 |
| C    | -5.6099144 | -6.6033473 | -4.156881  | H    | -2.408037  | -5.4556004 | 0.3286999  |
| O    | -6.4902469 | -4.1889379 | -2.5036907 | H    | -10.320895 | -0.7711278 | -7.2919681 |
| O    | -4.7187689 | -5.2463318 | -6.7592394 | H    | -11.050774 | -4.9672282 | -7.9028405 |
| O    | -1.6813952 | 4.1541713  | -1.1704734 | H    | 0.3262319  | 7.8047068  | -6.9290056 |
| O    | -1.0446859 | 1.7939352  | -5.2063663 | H    | 3.791767   | 7.0599007  | -4.4891377 |

|                                                               |            |            |            |   |            |              |            |
|---------------------------------------------------------------|------------|------------|------------|---|------------|--------------|------------|
| C                                                             | 1.675419   | -2.545044  | -0.5625242 | H | -9.5698238 | -6.5657806   | -7.3424945 |
| C                                                             | -1.6827029 | -3.8060617 | 0.8673542  | H | -7.8570456 | -6.1525246   | -7.10203   |
| O                                                             | 2.2989311  | -2.4222822 | 0.4681389  | H | -8.9131617 | -6.3372119   | -5.7104498 |
| O                                                             | 2.242243   | -2.410819  | -1.7816085 | H | -7.2829144 | -1.3989401   | -5.7038326 |
| O                                                             | -1.5950984 | -4.9487887 | 0.1417487  | H | -12.16703  | -1.6849734   | -8.3460577 |
| O                                                             | -2.6333174 | -3.554586  | 1.5711045  | H | -1.484963  | 6.4980911    | -6.9327044 |
| O                                                             | -6.394925  | -2.7497241 | -5.2637332 | H | -1.3957828 | 4.838704     | -6.301009  |
| O                                                             | 0.7485533  | 3.5610065  | -3.025406  | H | -2.0382174 | 6.1228171    | -5.2897859 |
| C                                                             | -8.8392652 | -2.1028779 | -6.5109352 | H | 2.2307282  | 9.0084933    | -6.9950424 |
| C                                                             | -10.040923 | -1.8130436 | -7.1645711 | H | 2.2423793  | 4.3251441    | -2.940178  |
| <b>NImag</b>                                                  |            |            |            |   |            | 0            |            |
| <b><math>\Sigma</math> Electronic and thermal Free Energy</b> |            |            |            |   |            | -1865700.368 |            |
| <b>mol Fraction</b>                                           |            |            |            |   |            | 0.150924969  |            |

**(8S, 13R, 8aS, 12aR, 13aR)-Diazaphilonic acid - Conformer 7**

| Atom | X          | Y          | Z          | Atom | X          | Y          | Z          |
|------|------------|------------|------------|------|------------|------------|------------|
| C    | -3.3339428 | -4.3803854 | -5.1196051 | C    | -10.290987 | -3.3015385 | -8.5903512 |
| C    | -3.173303  | -3.7474225 | -3.9162771 | C    | -10.130488 | -2.2520199 | -7.6732304 |
| C    | -4.2768965 | -3.5497247 | -2.9874989 | C    | -9.0996691 | -2.2824913 | -6.744348  |
| C    | -5.6421767 | -4.0691237 | -3.281458  | C    | -0.0484483 | 6.0829738  | -5.8787096 |
| C    | -5.7679622 | -4.97156   | -4.5228675 | C    | 0.5929791  | 7.1127464  | -6.5508279 |
| C    | -4.6248118 | -4.848236  | -5.5609604 | C    | 1.9367144  | 7.4257136  | -6.2892172 |
| C    | -1.9129952 | -3.1921869 | -3.4671351 | C    | 2.6674955  | 6.6935688  | -5.3643657 |
| C    | -1.7976396 | -2.5496127 | -2.2853731 | C    | 2.0538296  | 5.639248   | -4.6808629 |
| O    | -2.8798045 | -2.3727205 | -1.4581273 | C    | -8.9552386 | -1.1316721 | -5.7744582 |
| C    | -4.0759511 | -2.8782795 | -1.8319682 | O    | -7.5503004 | -5.5013689 | -7.7902244 |
| C    | -0.5195307 | -1.9897284 | -1.700664  | O    | -11.325041 | -3.1980637 | -9.4720535 |
| C    | -0.720878  | -0.6142294 | -1.0800324 | C    | -1.4865475 | 5.8006713  | -6.2534761 |
| C    | -0.6366418 | -0.4563176 | 0.261498   | O    | 2.4740877  | 8.4586211  | -6.9920627 |
| C    | -0.322226  | -1.5055795 | 1.2839119  | O    | 2.8284749  | 4.9631342  | -3.8183005 |
| C    | -0.3692691 | -2.9308266 | 0.7233748  | H    | -2.511443  | -4.4624846 | -5.8234303 |
| C    | 0.1684916  | -2.9902714 | -0.7269905 | H    | -1.0341706 | -3.2897711 | -4.096676  |
| C    | -0.9889389 | 0.5403705  | -1.9417385 | H    | -4.8548364 | -2.6842577 | -1.105059  |
| C    | -1.1610853 | 1.800592   | -1.2309853 | H    | 0.1762281  | -1.8768305 | -2.5384131 |
| C    | -1.0508478 | 1.8456682  | 0.1132829  | H    | -1.0289086 | -1.4113765 | 2.1141025  |
| O    | -0.793761  | 0.7631304  | 0.8751518  | H    | 0.675895   | -1.2982954 | 1.6922141  |
| C    | -1.0461504 | 0.4858261  | -3.3055116 | H    | 0.2853035  | -3.5642296 | 1.3330145  |
| C    | -1.2564242 | 1.6608815  | -4.135925  | H    | 0.0090326  | -4.0060637 | -1.108134  |
| C    | -1.7506569 | 2.9619545  | -3.4513393 | H    | -1.1564631 | 2.7533771  | 0.6938956  |
| C    | -1.4339987 | 3.0744853  | -1.9497279 | H    | -0.8791977 | -0.433616  | -3.8527701 |
| O    | -1.2270396 | 4.1007433  | -4.1516559 | H    | -3.7679264 | 2.2077075  | -3.1170089 |
| C    | 0.1126326  | 4.2430965  | -4.1027696 | H    | -3.6385342 | 3.9836298  | -3.1967736 |
| C    | 0.6755069  | 5.3282233  | -4.9026896 | H    | -3.5175549 | 3.0001447  | -4.6888956 |
| C    | -3.2762378 | 3.0444598  | -3.6237254 | H    | -4.9066713 | -6.7067577 | -3.5157099 |
| O    | -7.0008409 | -4.7432994 | -5.2075562 | H    | -6.6757855 | -6.5404101 | -3.353421  |
| C    | -7.1569697 | -3.467788  | -5.6963426 | H    | -5.9613675 | -7.0918965 | -4.8966592 |
| C    | -8.2237006 | -3.4017886 | -6.7062953 | H    | 3.2814881  | -3.1739256 | 0.1188298  |
| C    | -5.8293896 | -6.4303131 | -4.0364962 | H    | -2.7266278 | -5.1061933 | 0.4635225  |
| O    | -6.580808  | -3.8999709 | -2.5254795 | H    | -9.5015409 | -5.1830515 | -9.324114  |
| O    | -4.8578079 | -5.2087192 | -6.7171938 | H    | -10.827009 | -1.4209625 | -7.7046451 |
| O    | -1.4971171 | 4.1460151  | -1.3743531 | H    | 0.0671055  | 7.6930766  | -7.301223  |
| O    | -1.1377888 | 1.6438362  | -5.3537171 | H    | 3.7136043  | 6.9024736  | -5.1587766 |

|                                                               |            |            |            |   |            |              |            |
|---------------------------------------------------------------|------------|------------|------------|---|------------|--------------|------------|
| C                                                             | 1.6869522  | -2.7830557 | -0.7947254 | H | -9.7994283 | -0.4435322   | -5.8750603 |
| C                                                             | -1.7509153 | -3.5576908 | 0.9006362  | H | -8.913519  | -1.4757753   | -4.735438  |
| O                                                             | 2.2760367  | -2.2652652 | -1.7149799 | H | -8.0284785 | -0.5785626   | -5.9548535 |
| O                                                             | 2.3268655  | -3.3043627 | 0.2780859  | H | -6.7439635 | -5.4206584   | -7.2352594 |
| O                                                             | -1.8489506 | -4.7399199 | 0.2437344  | H | -11.326545 | -3.9790107   | -10.047842 |
| O                                                             | -2.6376481 | -3.1215412 | 1.5966294  | H | -1.7703494 | 6.4116606    | -7.1150605 |
| O                                                             | -6.4558453 | -2.5564061 | -5.2925395 | H | -1.635625  | 4.7469329    | -6.5057464 |
| O                                                             | 0.7815731  | 3.4853224  | -3.3830993 | H | -2.1701801 | 6.0282122    | -5.4297245 |
| C                                                             | -8.373239  | -4.4410809 | -7.663593  | H | 3.4017806  | 8.5713384    | -6.7303918 |
| C                                                             | -9.4171569 | -4.3817868 | -8.5949597 | H | 2.2804221  | 4.2237778    | -3.4507693 |
| <b>NImag</b>                                                  |            |            |            |   |            | 0            |            |
| <b><math>\Sigma</math> Electronic and thermal Free Energy</b> |            |            |            |   |            | -1865697.333 |            |
| <b>mol Fraction</b>                                           |            |            |            |   |            | 0.000894187  |            |

**(8S, 13R, 8aS, 12aR, 13aR)-Diazaphilonic acid - Conformer 8**

| Atom | X          | Y          | Z          | Atom | X          | Y          | Z          |
|------|------------|------------|------------|------|------------|------------|------------|
| C    | -2.9404156 | -4.3272139 | -5.3107041 | C    | -10.35355  | -3.0251001 | -8.2678705 |
| C    | -2.8910467 | -3.7754224 | -4.0638425 | C    | -9.9283753 | -4.3533044 | -8.1003892 |
| C    | -4.0428474 | -3.7679421 | -3.1709199 | C    | -8.7884841 | -4.6556578 | -7.3710277 |
| C    | -5.3346082 | -4.3863153 | -3.5727046 | C    | 1.7333772  | 6.2446092  | -4.1020487 |
| C    | -5.3256188 | -5.2105384 | -4.8755581 | C    | 2.2679762  | 7.1745428  | -4.9862852 |
| C    | -4.147967  | -4.9258558 | -5.8512075 | C    | 1.8788646  | 7.1835144  | -6.335247  |
| C    | -1.7128523 | -3.1304074 | -3.5146082 | C    | 0.963813   | 6.2567734  | -6.8170428 |
| C    | -1.7115871 | -2.5780919 | -2.2845117 | C    | 0.4059131  | 5.314864   | -5.9471477 |
| O    | -2.8364433 | -2.5823651 | -1.4919686 | C    | -8.3915937 | -6.1123233 | -7.2757908 |
| C    | -3.9575756 | -3.1793097 | -1.9578854 | O    | -7.8020435 | -1.1793426 | -6.5228221 |
| C    | -0.5288695 | -1.9262116 | -1.602649  | O    | -11.488366 | -2.8315954 | -8.9911985 |
| C    | -0.8965362 | -0.5963866 | -0.9609949 | C    | 2.1785859  | 6.2661398  | -2.6571761 |
| C    | -1.0106174 | -0.5123413 | 0.38719    | O    | 2.3884033  | 8.083009   | -7.2240896 |
| C    | -0.778446  | -1.5942468 | 1.3954603  | O    | -0.4273318 | 4.4229086  | -6.5187054 |
| C    | -0.5164315 | -2.9779863 | 0.7824604  | H    | -2.0836108 | -4.2847627 | -5.976518  |
| C    | 0.1781577  | -2.8856786 | -0.5928097 | H    | -0.804958  | -3.0893423 | -4.1081808 |
| C    | -1.1214495 | 0.5831193  | -1.7952276 | H    | -4.7769907 | -3.1299303 | -1.2517454 |
| C    | -1.4427164 | 1.796648   | -1.058861  | H    | 0.1980935  | -1.7320165 | -2.3958893 |
| C    | -1.5263572 | 1.7712141  | 0.2885641  | H    | -1.6454566 | -1.6475937 | 2.0621094  |
| O    | -1.3281514 | 0.6603802  | 1.0244221  | H    | 0.0807434  | -1.2951878 | 2.0069724  |
| C    | -1.0054892 | 0.5905264  | -3.161223  | H    | 0.1850824  | -3.5031607 | 1.4430662  |
| C    | -1.131027  | 1.8023936  | -3.9358421 | H    | 0.2104586  | -3.8798532 | -1.051431  |
| C    | -1.7728495 | 3.0453172  | -3.2808159 | H    | -1.7581547 | 2.6404215  | 0.8910764  |
| C    | -1.6791286 | 3.0972267  | -1.7472542 | H    | -0.7260205 | -0.2932461 | -3.7210193 |
| O    | -1.1870089 | 4.2036782  | -3.8789154 | H    | -3.7940369 | 2.2184852  | -3.2619928 |
| C    | 0.1550469  | 4.3603506  | -3.6357052 | H    | -3.7065926 | 3.9996554  | -3.25435   |
| C    | 0.7652818  | 5.3200429  | -4.569675  | H    | -3.356705  | 3.0883003  | -4.7521203 |
| C    | -3.263143  | 3.0878584  | -3.6629758 | H    | -4.3559533 | -6.9304765 | -3.9556999 |
| O    | -6.5701028 | -5.0365045 | -5.5716649 | H    | -6.1363633 | -6.9363229 | -3.8572377 |
| C    | -6.8384797 | -3.7743061 | -5.9636682 | H    | -5.31472   | -7.3004457 | -5.4068814 |
| C    | -8.034823  | -3.5926012 | -6.7804769 | H    | 3.2013683  | -2.0654983 | -1.3580806 |
| C    | -5.2805696 | -6.6988048 | -4.4950191 | H    | -2.4060522 | -5.5155624 | 0.1968849  |
| O    | -6.3292451 | -4.3342837 | -2.8719725 | H    | -9.9225161 | -0.9379506 | -7.8589274 |
| O    | -4.2562332 | -5.2867757 | -7.0158857 | H    | -10.51085  | -5.1413336 | -8.5653154 |
| O    | -1.8994157 | 4.1259179  | -1.135515  | H    | 2.9913286  | 7.9043217  | -4.6278417 |
| O    | -0.7927613 | 1.879781   | -5.1190552 | H    | 0.6923626  | 6.2407714  | -7.8659803 |

|                                                               |            |            |            |   |            |              |            |
|---------------------------------------------------------------|------------|------------|------------|---|------------|--------------|------------|
| C                                                             | 1.6393756  | -2.4753055 | -0.3903623 | H | -9.0341245 | -6.7131442   | -7.9256982 |
| C                                                             | -1.7664035 | -3.8532643 | 0.8014936  | H | -7.3500683 | -6.2642362   | -7.5731985 |
| O                                                             | 2.1892221  | -2.343621  | 0.6803216  | H | -8.4868439 | -6.4901958   | -6.2530435 |
| O                                                             | 2.2804489  | -2.312425  | -1.568319  | H | -6.9814334 | -1.5158823   | -6.081848  |
| O                                                             | -1.5980298 | -4.9828413 | 0.0702077  | H | -11.672408 | -1.880201    | -9.0448158 |
| O                                                             | -2.7675458 | -3.6375699 | 1.444355   | H | 2.8176715  | 7.1338717    | -2.4682036 |
| O                                                             | -6.0916906 | -2.852114  | -5.600246  | H | 1.3280825  | 6.3104358    | -1.9686035 |
| O                                                             | 0.7057069  | 3.7430802  | -2.7403496 | H | 2.735624   | 5.3593937    | -2.4025686 |
| C                                                             | -8.4640104 | -2.2454655 | -6.9978382 | H | 3.0186141  | 8.6576572    | -6.7620815 |
| C                                                             | -9.6268256 | -1.9747485 | -7.7256203 | H | -0.6710018 | 3.6913727    | -5.9114808 |
| <b>NImag</b>                                                  |            |            |            |   |            | 0            |            |
| <b><math>\Sigma</math> Electronic and thermal Free Energy</b> |            |            |            |   |            | -1865697.571 |            |
| <b>mol Fraction</b>                                           |            |            |            |   |            | 0.00133644   |            |



**(8S, 13R, 8aS, 12aR, 13aR)-Diazaphilonic acid - Conformer 9**

| Atom | X          | Y          | Z          | Atom | X          | Y          | Z          |
|------|------------|------------|------------|------|------------|------------|------------|
| C    | -3.3078503 | -4.4064731 | -5.1524528 | C    | -10.2133   | -3.5050152 | -8.7804696 |
| C    | -3.1701241 | -3.7489903 | -3.9595161 | C    | -10.082583 | -2.4261855 | -7.8932245 |
| C    | -4.290399  | -3.5340803 | -3.0563116 | C    | -9.068157  | -2.4152393 | -6.9458248 |
| C    | -5.6504982 | -4.0557519 | -3.3661426 | C    | 0.3023705  | 6.1987172  | -5.6663896 |
| C    | -5.7483356 | -4.9948744 | -4.5817172 | C    | 1.0135231  | 7.2256596  | -6.2688652 |
| C    | -4.5884961 | -4.8915961 | -5.6036011 | C    | 2.3467005  | 7.4914651  | -5.9164106 |
| C    | -1.9208511 | -3.1801458 | -3.4985209 | C    | 2.9973036  | 6.7142096  | -4.968632  |
| C    | -1.8267299 | -2.5235497 | -2.3231897 | C    | 2.3124024  | 5.6617993  | -4.3536139 |
| O    | -2.9231571 | -2.3316992 | -1.5175031 | C    | -8.9553107 | -1.2340871 | -6.008682  |
| C    | -4.1101558 | -2.8454539 | -1.9087132 | O    | -7.4598017 | -5.6431765 | -7.8648817 |
| C    | -0.5567139 | -1.9440776 | -1.73566   | O    | -11.23273  | -3.4421162 | -9.6832258 |
| C    | -0.7932228 | -0.5829102 | -1.1016209 | C    | -1.1171646 | 5.9701185  | -6.1363575 |
| C    | -0.8120914 | -0.4673964 | 0.2466265  | O    | 2.955514   | 8.5254677  | -6.5559323 |
| C    | -0.5666584 | -1.5432308 | 1.2590944  | O    | 3.0119401  | 4.9408002  | -3.463316  |
| C    | -0.4431431 | -2.9556333 | 0.6575055  | H    | -2.4728007 | -4.5023598 | -5.8395093 |
| C    | 0.1586022  | -2.9324729 | -0.7589925 | H    | -1.0301711 | -3.2875735 | -4.1094942 |
| C    | -1.0067931 | 0.5924819  | -1.9483854 | H    | -4.907239  | -2.6397236 | -1.2054212 |
| C    | -1.2088283 | 1.8359619  | -1.2168203 | H    | 0.123438   | -1.8115183 | -2.5815344 |
| C    | -1.2009485 | 1.8414626  | 0.1329788  | H    | -1.3571383 | -1.5090374 | 2.0140241  |
| O    | -1.0173542 | 0.7345676  | 0.8812677  | H    | 0.3686982  | -1.2964281 | 1.7760681  |
| C    | -0.9902515 | 0.5699672  | -3.3143802 | H    | 0.264959   | -3.505233  | 1.2915474  |
| C    | -1.1307577 | 1.7678952  | -4.126251  | H    | 0.073134   | -3.9374933 | -1.1877745 |
| C    | -1.6341421 | 3.0643625  | -3.4394522 | H    | -1.3400551 | 2.7341103  | 0.729772   |
| C    | -1.4121094 | 3.1322986  | -1.9179575 | H    | -0.8143524 | -0.3408498 | -3.8740148 |
| O    | -1.0361647 | 4.2053692  | -4.0744821 | H    | -3.6875201 | 2.3584041  | -3.2551597 |
| C    | 0.30052    | 4.3089     | -3.9364326 | H    | -3.50694   | 4.1315303  | -3.2789227 |
| C    | 0.9424822  | 5.3974098  | -4.6688378 | H    | -3.3154746 | 3.1824909  | -4.7860448 |
| C    | -3.1424744 | 3.1936673  | -3.7068432 | H    | -4.8901653 | -6.687615  | -3.5018978 |
| O    | -6.9712959 | -4.798497  | -5.2938308 | H    | -6.6635666 | -6.5373695 | -3.3836102 |
| C    | -7.1287783 | -3.5423723 | -5.8284606 | H    | -5.910327  | -7.1279904 | -4.8933756 |
| C    | -8.1790701 | -3.5209128 | -6.8583271 | H    | 3.1663128  | -2.3421111 | -1.7559087 |
| C    | -5.80373   | -6.4387662 | -4.0515162 | H    | -3.2440372 | -4.158809  | 1.7104685  |
| O    | -6.6067212 | -3.857693  | -2.6394646 | H    | -9.3873215 | -5.3974695 | -9.44222   |
| O    | -4.8000361 | -5.2824405 | -6.7544062 | H    | -10.788882 | -1.6056833 | -7.962089  |
| O    | -1.4921594 | 4.1902125  | -1.3200283 | H    | 0.5521544  | 7.8409708  | -7.0336637 |
| O    | -0.9419998 | 1.7768823  | -5.3353695 | H    | 4.0337741  | 6.8868077  | -4.6926613 |

|                                                               |            |            |            |   |            |              |            |
|---------------------------------------------------------------|------------|------------|------------|---|------------|--------------|------------|
| C                                                             | 1.6540398  | -2.6288031 | -0.6726859 | H | -9.8058913 | -0.5599961   | -6.1447205 |
| C                                                             | -1.7009926 | -3.8174642 | 0.6993143  | H | -8.9280872 | -1.5466355   | -4.9592258 |
| O                                                             | 2.2906517  | -2.5302058 | 0.3532618  | H | -8.0321704 | -0.6749945   | -6.1891781 |
| O                                                             | 2.2166995  | -2.520415  | -1.8959778 | H | -6.6636679 | -5.534645    | -7.2993812 |
| O                                                             | -2.5207995 | -3.50308   | 1.7255373  | H | -11.213931 | -4.2406008   | -10.234092 |
| O                                                             | -1.9185605 | -4.7468347 | -0.047951  | H | -1.3299987 | 6.6134027    | -6.9948366 |
| O                                                             | -6.4426088 | -2.6106432 | -5.4462449 | H | -1.2799392 | 4.9288691    | -6.4289029 |
| O                                                             | 0.901482   | 3.5137281  | -3.1965313 | H | -1.8436841 | 6.1945278    | -5.3492986 |
| C                                                             | -8.2981255 | -4.5906052 | -7.7856808 | H | 3.867552   | 8.6050876    | -6.2339552 |
| C                                                             | -9.325988  | -4.5732703 | -8.7366746 | H | 2.4192334  | 4.2117329    | -3.148493  |
| <b>NImag</b>                                                  |            |            |            |   |            | 0            |            |
| <b><math>\Sigma</math> Electronic and thermal Free Energy</b> |            |            |            |   |            | -1865698.182 |            |
| <b>mol Fraction</b>                                           |            |            |            |   |            | 0.003749684  |            |

**(8S, 13R, 8aS, 12aR, 13aR)-Diazaphilonic acid - Conformer 10**

| Atom | X          | Y          | Z          | Atom | X          | Y          | Z          |
|------|------------|------------|------------|------|------------|------------|------------|
| C    | -3.241607  | -4.1691411 | -5.1987769 | C    | -10.195217 | -2.8862111 | -8.6007813 |
| C    | -3.0883151 | -3.618474  | -3.9550271 | C    | -10.039992 | -1.9023271 | -7.6126491 |
| C    | -4.1947977 | -3.4942656 | -3.0168431 | C    | -9.0111946 | -1.9938984 | -6.6856726 |
| C    | -5.5553318 | -4.0042269 | -3.3483061 | C    | 1.7291443  | 6.1997602  | -4.2189055 |
| C    | -5.6727561 | -4.8186726 | -4.6499937 | C    | 2.1752154  | 7.1314944  | -5.1460361 |
| C    | -4.5282914 | -4.6160606 | -5.6740784 | C    | 1.6221283  | 7.1712272  | -6.4348098 |
| C    | -1.8334801 | -3.0837062 | -3.4668019 | C    | 0.6300826  | 6.2741038  | -6.8109335 |
| C    | -1.7255854 | -2.5226308 | -2.2437098 | C    | 0.1570475  | 5.3289763  | -5.8922681 |
| O    | -2.8097919 | -2.4125634 | -1.4076812 | C    | -8.872819  | -0.9124746 | -5.6381709 |
| C    | -4.0013321 | -2.9021977 | -1.8176185 | O    | -7.4494011 | -5.1279942 | -7.9487999 |
| C    | -0.4531481 | -1.9921835 | -1.6204575 | O    | -11.227527 | -2.7248019 | -9.475495  |
| C    | -0.6687118 | -0.6649978 | -0.9054731 | C    | 2.3495548  | 6.1841731  | -2.840151  |
| C    | -0.5813721 | -0.5991405 | 0.4449308  | O    | 2.1137771  | 8.1129022  | -7.2888834 |
| C    | -0.2498323 | -1.7132499 | 1.3902797  | O    | -0.7633528 | 4.4698582  | -6.373978  |
| C    | -0.2883916 | -3.0966066 | 0.7331167  | H    | -2.4173782 | -4.1967602 | -5.9048443 |
| C    | 0.2453359  | -3.0516782 | -0.7190639 | H    | -0.9530107 | -3.1305201 | -4.099931  |
| C    | -0.9517923 | 0.5429629  | -1.6814297 | H    | -4.7827236 | -2.7653776 | -1.0804675 |
| C    | -1.1361964 | 1.7486954  | -0.8871454 | H    | 0.2421063  | -1.8144036 | -2.4472765 |
| C    | -1.0239415 | 1.7009078  | 0.457148   | H    | -0.9509508 | -1.6824352 | 2.2298364  |
| O    | -0.7513378 | 0.5711837  | 1.1396675  | H    | 0.7496167  | -1.5246229 | 1.8042837  |
| C    | -1.0063105 | 0.5793155  | -3.0502614 | H    | 0.3725166  | -3.7656222 | 1.2959661  |
| C    | -1.1967663 | 1.8123494  | -3.7781545 | H    | 0.0920429  | -4.0398651 | -1.1689709 |
| C    | -1.7241144 | 3.0524398  | -3.023354  | H    | -1.1406003 | 2.5644188  | 1.0996836  |
| C    | -1.4361501 | 3.0680183  | -1.5133295 | H    | -0.8166656 | -0.2963128 | -3.6580918 |
| O    | -1.1939229 | 4.2120566  | -3.6680851 | H    | -3.7442459 | 2.2628563  | -2.76579   |
| C    | 0.1718352  | 4.3410308  | -3.5861308 | H    | -3.6181298 | 4.0414779  | -2.7329047 |
| C    | 0.6842116  | 5.3037429  | -4.5734271 | H    | -3.4798623 | 3.1579345  | -4.2811383 |
| C    | -3.2495421 | 3.1311049  | -3.2128544 | H    | -4.8035715 | -6.615195  | -3.7646247 |
| O    | -6.9052537 | -4.5496123 | -5.3204288 | H    | -6.5739485 | -6.4707048 | -3.59582   |
| C    | -7.067231  | -3.2432329 | -5.7178328 | H    | -5.8527996 | -6.9085902 | -5.1720146 |
| C    | -8.1316937 | -3.1106687 | -6.7231427 | H    | 3.3626365  | -3.2700426 | 0.1034336  |
| C    | -5.7267129 | -6.3081869 | -4.2672638 | H    | -2.6314283 | -5.2661182 | 0.332209   |
| O    | -6.495552  | -3.896648  | -2.5831985 | H    | -9.3981465 | -4.7099546 | -9.4613309 |
| O    | -4.7557507 | -4.8979977 | -6.8527545 | H    | -10.739018 | -1.0731521 | -7.5881485 |
| O    | -1.5623194 | 4.0847724  | -0.8566878 | H    | 2.9531025  | 7.8430084  | -4.8901533 |
| O    | -1.0064069 | 1.9097097  | -4.9923089 | H    | 0.2187088  | 6.2640016  | -7.8166603 |

|                                                               |            |            |            |   |            |              |            |
|---------------------------------------------------------------|------------|------------|------------|---|------------|--------------|------------|
| C                                                             | 1.7621952  | -2.8285231 | -0.7765913 | H | -9.7193731 | -0.222109    | -5.6927346 |
| C                                                             | -1.6658005 | -3.7429431 | 0.8699427  | H | -8.8317222 | -1.3274972   | -4.625368  |
| O                                                             | 2.3434341  | -2.2431846 | -1.660578  | H | -7.9479161 | -0.3447094   | -5.7780084 |
| O                                                             | 2.4093405  | -3.417909  | 0.2554984  | H | -6.6450932 | -5.0835555   | -7.3872474 |
| O                                                             | -1.7565436 | -4.8797673 | 0.1368987  | H | -11.225493 | -3.4636532   | -10.104403 |
| O                                                             | -2.5544013 | -3.3581611 | 1.5932536  | H | 3.032706   | 7.0302328    | -2.7225335 |
| O                                                             | -6.3713508 | -2.3597216 | -5.2479226 | H | 1.5920351  | 6.2413589    | -2.0510342 |
| O                                                             | 0.8120094  | 3.6990614  | -2.7717479 | H | 2.9057948  | 5.2575664    | -2.6687497 |
| C                                                             | -8.2760322 | -4.0815169 | -7.7506633 | H | 1.6510227  | 8.0386175    | -8.1384512 |
| C                                                             | -9.3179921 | -3.9609606 | -8.6781569 | H | -0.946983  | 3.72972      | -5.7554212 |
| <b>NImag</b>                                                  |            |            |            |   |            | 0            |            |
| <b><math>\Sigma</math> Electronic and thermal Free Energy</b> |            |            |            |   |            | -1865694.711 |            |
| <b>mol Fraction</b>                                           |            |            |            |   |            | 1.06E-05     |            |

**(8S, 13R, 8aS, 12aR, 13aR)-Diazaphilonic acid - Conformer 11**

| Atom | X          | Y          | Z          | Atom | X          | Y          | Z          |
|------|------------|------------|------------|------|------------|------------|------------|
| C    | -4.1177479 | -5.1894493 | -4.897772  | C    | -4.281031  | -1.2626846 | -6.6229911 |
| C    | -3.8917917 | -4.2784368 | -3.9090151 | C    | -4.6089789 | -2.4067904 | -7.3725828 |
| C    | -4.9693618 | -3.7384386 | -3.0928611 | C    | -5.7840189 | -3.1088987 | -7.1340939 |
| C    | -6.388828  | -4.057462  | -3.3903641 | C    | -1.3857975 | 6.0647874  | -5.6606073 |
| C    | -6.6757208 | -5.1537806 | -4.4436381 | C    | -0.8510274 | 7.1069484  | -6.401515  |
| C    | -5.4447786 | -5.661779  | -5.2509075 | C    | 0.5355294  | 7.2300359  | -6.5917728 |
| C    | -2.5848721 | -3.7422918 | -3.5849643 | C    | 1.4096549  | 6.2990886  | -6.0495554 |
| C    | -2.3998888 | -2.8904987 | -2.5559788 | C    | 0.9027088  | 5.2312635  | -5.3031433 |
| O    | -3.4436399 | -2.4784975 | -1.7614318 | C    | -6.182728  | -4.216785  | -8.085245  |
| C    | -4.6949693 | -2.8850466 | -2.0809757 | O    | -7.2422724 | -0.8888354 | -4.5581201 |
| C    | -1.0564786 | -2.3135522 | -2.1401425 | O    | -3.0869417 | -0.6831906 | -6.8675569 |
| C    | -1.169189  | -0.9969489 | -1.3850998 | C    | -2.8917855 | 6.0140235  | -5.5302467 |
| C    | -0.8342132 | -0.9420137 | -0.071253  | O    | 0.9599331  | 8.2889801  | -7.3291141 |
| C    | -0.3651011 | -2.0655222 | 0.7980322  | O    | 1.8090309  | 4.3677728  | -4.8207144 |
| C    | -0.5014399 | -3.4377871 | 0.1316819  | H    | -3.2989948 | -5.5820028 | -5.4934615 |
| C    | -0.1873324 | -3.3649722 | -1.3769727 | H    | -1.728779  | -4.026626  | -4.1893203 |
| C    | -1.6125165 | 0.2120563  | -2.0773489 | H    | -5.4508242 | -2.445262  | -1.4429523 |
| C    | -1.5783944 | 1.4212652  | -1.2720098 | H    | -0.5283096 | -2.1080362 | -3.077173  |
| C    | -1.2046016 | 1.3678111  | 0.0253491  | H    | -0.9384307 | -2.0437378 | 1.7300074  |
| O    | -0.8577261 | 0.2274128  | 0.6457165  | H    | 0.6853589  | -1.886163  | 1.0539817  |
| C    | -2.014701  | 0.2481545  | -3.3891591 | H    | 0.2397209  | -4.1111145 | 0.5787012  |
| C    | -2.4315053 | 1.4649256  | -4.0411984 | H    | -0.3837142 | -4.3411499 | -1.8329006 |
| C    | -2.6394567 | 2.7460141  | -3.2018989 | H    | -1.1566691 | 2.2340304  | 0.6733088  |
| C    | -1.9330439 | 2.7496111  | -1.8367103 | H    | -2.0216141 | -0.6397729 | -4.0112689 |
| O    | -2.2440102 | 3.8979226  | -3.961783  | H    | -4.5473418 | 2.0762741  | -2.382078  |
| C    | -0.9299004 | 3.9632717  | -4.2648866 | H    | -4.3166434 | 3.843517   | -2.3962927 |
| C    | -0.5051164 | 5.0960906  | -5.0792403 | H    | -4.6637565 | 2.9663808  | -3.9175675 |
| C    | -4.1480829 | 2.9192697  | -2.9552127 | H    | -6.5123251 | -6.7834242 | -2.9969705 |
| O    | -7.752802  | -4.7295053 | -5.3125971 | H    | -8.139037  | -6.0572898 | -3.1389768 |
| C    | -7.8692116 | -3.4026577 | -5.6677885 | H    | -7.5075564 | -7.1320676 | -4.4301057 |
| C    | -6.6503442 | -2.6747178 | -6.0954353 | H    | 2.5793781  | -2.8350977 | -2.9421065 |
| C    | -7.2502971 | -6.3679728 | -3.6929557 | H    | -2.8754148 | -5.6077233 | 0.0431103  |
| O    | -7.3070506 | -3.510287  | -2.8019052 | H    | -5.000255  | 0.1719724  | -5.1623353 |
| O    | -5.6308517 | -6.4938582 | -6.1317701 | H    | -3.9315237 | -2.7167774 | -8.1621318 |
| O    | -1.7664719 | 3.7856763  | -1.2200242 | H    | -1.498384  | 7.849433   | -6.8551932 |
| O    | -2.7274262 | 1.5265822  | -5.2405351 | H    | 2.4847787  | 6.3653371  | -6.1900129 |

|                                                               |            |            |            |   |            |              |            |
|---------------------------------------------------------------|------------|------------|------------|---|------------|--------------|------------|
| C                                                             | 1.3083424  | -3.1156565 | -1.5806833 | H | -5.3045993 | -4.7500498   | -8.4600454 |
| C                                                             | -1.8562732 | -4.0733404 | 0.4336703  | H | -6.8506623 | -4.9501127   | -7.6340938 |
| O                                                             | 2.1438793  | -3.095468  | -0.7046107 | H | -6.6982669 | -3.7759815   | -8.9489867 |
| O                                                             | 1.6131556  | -2.9652351 | -2.888448  | H | -8.1010558 | -1.3511699   | -4.6306128 |
| O                                                             | -2.0148567 | -5.2405304 | -0.2353717 | H | -2.9685507 | 0.1260122    | -6.3145426 |
| O                                                             | -2.680063  | -3.6433879 | 1.2071587  | H | -3.3404432 | 6.819062     | -6.1186662 |
| O                                                             | -8.9630913 | -2.8802047 | -5.5700299 | H | -3.2946115 | 5.0598633    | -5.8820037 |
| O                                                             | -0.1677351 | 3.0820491  | -3.8342299 | H | -3.2112753 | 6.1276733    | -4.4899733 |
| C                                                             | -6.38729   | -1.4342753 | -5.4572125 | H | 1.9279595  | 8.264707     | -7.3950436 |
| C                                                             | -5.1905235 | -0.7566608 | -5.688009  | H | 1.3118166  | 3.659058     | -4.3390309 |
| <b>NImag</b>                                                  |            |            |            |   |            | 0            |            |
| <b><math>\Sigma</math> Electronic and thermal Free Energy</b> |            |            |            |   |            | -1865686.958 |            |
| <b>mol Fraction</b>                                           |            |            |            |   |            | 2.18E-11     |            |

**(8S, 13R, 8aS, 12aR, 13aR)-Diazaphilonic acid - Conformer 12**

| Atom | X          | Y          | Z          | Atom | X          | Y          | Z          |
|------|------------|------------|------------|------|------------|------------|------------|
| C    | -3.383484  | -4.3896643 | -5.2176239 | C    | -10.868773 | -2.3496527 | -7.4986235 |
| C    | -3.1451331 | -3.8025452 | -4.009122  | C    | -10.576176 | -3.7109929 | -7.3139425 |
| C    | -4.1918285 | -3.628454  | -3.0101736 | C    | -9.4083108 | -4.1152906 | -6.6851293 |
| C    | -5.5788572 | -4.1071006 | -3.2536049 | C    | 1.7893088  | 5.937615   | -4.8209756 |
| C    | -5.7952636 | -4.9737291 | -4.5099652 | C    | 2.1788307  | 6.8468846  | -5.7977464 |
| C    | -4.6991681 | -4.8632525 | -5.6084338 | C    | 1.5433441  | 6.8667666  | -7.0494422 |
| C    | -1.85259   | -3.2792899 | -3.6078858 | C    | 0.5234485  | 5.9713042  | -7.3428545 |
| C    | -1.6625291 | -2.6897306 | -2.4099152 | C    | 0.1081903  | 5.0506206  | -6.3757839 |
| O    | -2.6946529 | -2.5343776 | -1.5125733 | C    | -9.1645503 | -5.6033696 | -6.5638523 |
| C    | -3.9177897 | -3.009022  | -1.8412563 | O    | -7.9684204 | -0.7460552 | -6.092175  |
| C    | -0.3462658 | -2.1701196 | -1.8745032 | O    | -12.042911 | -2.0536135 | -8.1170452 |
| C    | -0.4946629 | -0.8209888 | -1.1835275 | C    | 2.4999035  | 5.9459033  | -3.4863409 |
| C    | -0.3301822 | -0.7234933 | 0.1576443  | O    | 1.9064987  | 7.7467746  | -8.0256743 |
| C    | 0.0319415  | -1.8203122 | 1.1119782  | O    | -0.8469356 | 4.1867172  | -6.7730372 |
| C    | -0.0694869 | -3.2185395 | 0.4942052  | H    | -2.6000839 | -4.4705538 | -5.9652468 |
| C    | 0.3828445  | -3.2197465 | -0.9862412 | H    | -1.0115456 | -3.3616788 | -4.2893072 |
| C    | -0.7987303 | 0.3732128  | -1.972981  | H    | -4.6524925 | -2.8348583 | -1.0649602 |
| C    | -0.9139668 | 1.601916   | -1.2007961 | H    | 0.3036493  | -2.0271708 | -2.7438273 |
| C    | -0.7263074 | 1.58498    | 0.1358622  | H    | -0.6207448 | -1.7542476 | 1.9877894  |
| O    | -0.4378693 | 0.4672668  | 0.8308876  | H    | 1.0562978  | -1.6419904 | 1.4653707  |
| C    | -0.9311742 | 0.3771798  | -3.3369332 | H    | 0.6093738  | -3.8865155 | 1.0365775  |
| C    | -1.1430705 | 1.5953525  | -4.0838979 | H    | 0.1866805  | -4.2155461 | -1.4012838 |
| C    | -1.6056901 | 2.8620702  | -3.3304777 | H    | -0.7893473 | 2.4664863  | 0.7612581  |
| C    | -1.2227168 | 2.9113668  | -1.8427294 | H    | -0.7941247 | -0.5170147 | -3.9316322 |
| O    | -1.1045194 | 3.9977995  | -4.0376643 | H    | -3.6147291 | 2.1074859  | -2.9238262 |
| C    | 0.2641319  | 4.110796   | -4.0496714 | H    | -3.4656806 | 3.8844576  | -2.9474662 |
| C    | 0.7198204  | 5.0464184  | -5.0902971 | H    | -3.4368541 | 2.9590334  | -4.4767006 |
| C    | -3.139231  | 2.9567808  | -3.4248257 | H    | -4.9339978 | -6.7595418 | -3.6078439 |
| O    | -7.0773725 | -4.6827734 | -5.0887916 | H    | -6.6845753 | -6.5560483 | -3.3358374 |
| C    | -7.2425791 | -3.4129306 | -5.5122233 | H    | -6.0715731 | -7.0687501 | -4.9390941 |
| C    | -8.4877951 | -3.1248376 | -6.2178788 | H    | 3.5357121  | -3.491566  | -0.3357534 |
| C    | -5.8774694 | -6.4423468 | -4.0647016 | H    | -2.4728805 | -5.347508  | 0.2776778  |
| O    | -6.483949  | -3.9160356 | -2.4613388 | H    | -10.173663 | -0.3119342 | -7.2270345 |
| O    | -4.9662191 | -5.2519965 | -6.7381456 | H    | -11.284791 | -4.4434674 | -7.6851356 |
| O    | -1.283602  | 3.9480187  | -1.2080492 | H    | 2.9811882  | 7.5515574  | -5.5879854 |
| O    | -1.0237528 | 1.6600313  | -5.3090403 | H    | 0.0594227  | 5.9622092  | -8.3220456 |

|                                                               |            |            |            |   |            |              |            |
|---------------------------------------------------------------|------------|------------|------------|---|------------|--------------|------------|
| C                                                             | 1.8978091  | -3.0278276 | -1.1310918 | H | -9.9297495 | -6.1494857   | -7.1228472 |
| C                                                             | -1.44866   | -3.8336337 | 0.7244643  | H | -8.1802435 | -5.8812602   | -6.9514233 |
| O                                                             | 2.4414195  | -2.4645543 | -2.052608  | H | -9.1986381 | -5.9337149   | -5.5209628 |
| O                                                             | 2.5898353  | -3.6184264 | -0.1286812 | H | -7.1482224 | -1.1575748   | -5.7194199 |
| O                                                             | -1.6019253 | -4.9854868 | 0.0265179  | H | -12.126068 | -1.0898616   | -8.1955542 |
| O                                                             | -2.2868302 | -3.4146386 | 1.4880049  | H | 3.1919065  | 6.7914619    | -3.4284326 |
| O                                                             | -6.3659378 | -2.5699691 | -5.2656506 | H | 1.7968124  | 6.020263     | -2.64993   |
| O                                                             | 0.9514815  | 3.4801002  | -3.2655594 | H | 3.064181   | 5.0207882    | -3.3345664 |
| C                                                             | -8.7870644 | -1.7459679 | -6.4529538 | H | 2.6329873  | 8.2981927    | -7.6955794 |
| C                                                             | -9.9809688 | -1.370404  | -7.0764741 | H | -0.9935661 | 3.4633441    | -6.126058  |
| <b>NImag</b>                                                  |            |            |            |   |            | 0            |            |
| <b><math>\Sigma</math> Electronic and thermal Free Energy</b> |            |            |            |   |            | -1865696.728 |            |
| <b>mol Fraction</b>                                           |            |            |            |   |            | 0.000321416  |            |



**(8S, 13R, 8aS, 12aR, 13aR)-Diazaphilonic acid - Conformer 13**

| Atom | X          | Y          | Z          | Atom | X          | Y          | Z          |
|------|------------|------------|------------|------|------------|------------|------------|
| C    | -4.3943289 | -5.1753384 | -4.8714591 | C    | -4.5107582 | -1.2523542 | -6.6043421 |
| C    | -4.0479263 | -4.2745303 | -3.9085824 | C    | -4.9524241 | -2.3809333 | -7.3181441 |
| C    | -5.0305132 | -3.6836606 | -3.0117303 | C    | -6.1362217 | -3.0256241 | -6.9810725 |
| C    | -6.4824811 | -3.9365781 | -3.1932472 | C    | 1.1403213  | 5.1346143  | -5.6351263 |
| C    | -6.9033178 | -5.0198612 | -4.2145302 | C    | 1.5127298  | 6.1409306  | -6.5127017 |
| C    | -5.7658601 | -5.5858545 | -5.1149276 | C    | 0.5486079  | 6.8570872  | -7.2387021 |
| C    | -2.6958002 | -3.799438  | -3.6927901 | C    | -0.8021315 | 6.576479   | -7.0851665 |
| C    | -2.3898379 | -2.9555234 | -2.6864359 | C    | -1.2091762 | 5.5762939  | -6.1972383 |
| O    | -3.3463887 | -2.4940167 | -1.8131987 | C    | -6.6628667 | -4.115185  | -7.8902008 |
| C    | -4.6367991 | -2.8423797 | -2.0295483 | O    | -7.2728507 | -0.7338441 | -4.3076998 |
| C    | -0.992245  | -2.4410772 | -2.3824264 | O    | -3.3143497 | -0.730954  | -6.9484033 |
| C    | -0.9831173 | -1.1178071 | -1.6304525 | C    | 2.238929   | 4.4093339  | -4.8919221 |
| C    | -0.5415539 | -1.0738571 | -0.3477692 | O    | 1.0033493  | 7.8211298  | -8.0815949 |
| C    | -0.0564497 | -2.2149491 | 0.4891986  | O    | -2.5409065 | 5.3779511  | -6.1402962 |
| C    | -0.3106595 | -3.5816534 | -0.1534619 | H    | -3.6449972 | -5.6064779 | -5.5286652 |
| C    | -0.1153973 | -3.5298391 | -1.6828865 | H    | -1.9048773 | -4.124341  | -4.3620189 |
| C    | -1.4231984 | 0.1079525  | -2.2936492 | H    | -5.3179528 | -2.3668487 | -1.3354991 |
| C    | -1.2681135 | 1.3172422  | -1.503546  | H    | -0.5310683 | -2.2639616 | -3.3597424 |
| C    | -0.796125  | 1.2507101  | -0.2391901 | H    | -0.5503329 | -2.162475  | 1.4644133  |
| O    | -0.4538458 | 0.097571   | 0.3596583  | H    | 1.0186263  | -2.0845329 | 0.6575301  |
| C    | -1.9287041 | 0.1565491  | -3.5697277 | H    | 0.4311714  | -4.2879168 | 0.2382144  |
| C    | -2.3320859 | 1.3888222  | -4.1958705 | H    | -0.3937787 | -4.4972174 | -2.1141707 |
| C    | -2.4011957 | 2.6863355  | -3.3607158 | H    | -0.6577603 | 2.115965   | 0.396879   |
| C    | -1.606719  | 2.6598525  | -2.0448473 | H    | -2.0282618 | -0.7331065 | -4.1812593 |
| O    | -1.9675332 | 3.7949985  | -4.1653469 | H    | -4.2850098 | 2.1720126  | -2.3922465 |
| C    | -0.6330798 | 3.7558954  | -4.5360333 | H    | -3.9399922 | 3.9177582  | -2.478946  |
| C    | -0.2467327 | 4.8341204  | -5.449867  | H    | -4.4575748 | 3.0213496  | -3.9418448 |
| C    | -3.8733732 | 2.9697323  | -3.019063  | H    | -6.7006756 | -6.6533067 | -2.7772137 |
| O    | -8.0256239 | -4.5467631 | -4.9967682 | H    | -8.2979928 | -5.8520676 | -2.7925753 |
| C    | -8.1072136 | -3.2165536 | -5.349116  | H    | -7.8225342 | -6.9570316 | -4.1244561 |
| C    | -6.8936703 | -2.5486248 | -5.8780793 | H    | 2.5382767  | -3.1401384 | -3.4690138 |
| C    | -7.4718484 | -6.2047612 | -3.4141567 | H    | -2.7850837 | -5.6349061 | -0.0359113 |
| O    | -7.3243047 | -3.3460755 | -2.5364197 | H    | -5.039892  | 0.2174909  | -5.0981562 |
| O    | -6.0601708 | -6.4097141 | -5.9737134 | H    | -4.3569324 | -2.7243899 | -8.1582844 |
| O    | -1.3664413 | 3.6870724  | -1.4379198 | H    | 2.5582823  | 6.3920483  | -6.6544383 |
| O    | -2.7162919 | 1.4656869  | -5.3703708 | H    | -1.5677091 | 7.1115698  | -7.639847  |

|                                                               |            |            |            |   |            |              |            |
|---------------------------------------------------------------|------------|------------|------------|---|------------|--------------|------------|
| C                                                             | 1.3691592  | -3.3529942 | -2.0076623 | H | -5.8442789 | -4.6906619   | -8.3314277 |
| C                                                             | -1.6655644 | -4.1502801 | 0.2607922  | H | -7.3261018 | -4.8147375   | -7.3820873 |
| O                                                             | 2.2723445  | -3.3671269 | -1.2013699 | H | -7.2251455 | -3.652103    | -8.7121091 |
| O                                                             | 1.5745702  | -3.2250405 | -3.336981  | H | -8.1560183 | -1.1540107   | -4.3080799 |
| O                                                             | -1.9332604 | -5.3104386 | -0.3852903 | H | -3.1137494 | 0.0736212    | -6.4129373 |
| O                                                             | -2.4027783 | -3.67865   | 1.0949671  | H | 3.2025294  | 4.8831375    | -5.1004882 |
| O                                                             | -9.1634243 | -2.6420477 | -5.1664133 | H | 2.0727474  | 4.4155109    | -3.8105377 |
| O                                                             | 0.0791159  | 2.8751725  | -4.0832706 | H | 2.2935496  | 3.3572       | -5.1861871 |
| C                                                             | -6.5209137 | -1.3211098 | -5.2703197 | H | 0.2480525  | 8.2406659    | -8.5237307 |
| C                                                             | -5.3160618 | -0.7019194 | -5.6014303 | H | -2.7302489 | 4.67694      | -5.4869159 |
| <b>NImag</b>                                                  |            |            |            |   |            | 0            |            |
| <b><math>\Sigma</math> Electronic and thermal Free Energy</b> |            |            |            |   |            | -1865684.171 |            |
| <b>mol Fraction</b>                                           |            |            |            |   |            | 1.96E-13     |            |

**(8S, 13R, 8aS, 12aR, 13aR)-Diazaphilonic acid - Conformer 14**

| Atom | X          | Y          | Z          | Atom | X          | Y          | Z          |
|------|------------|------------|------------|------|------------|------------|------------|
| C    | -3.0625015 | -4.3255161 | -5.3304456 | C    | -10.564422 | -3.1067007 | -8.0542033 |
| C    | -2.9623492 | -3.7882478 | -4.0803637 | C    | -9.7879488 | -4.24145   | -8.3025753 |
| C    | -4.0794397 | -3.7886739 | -3.1459404 | C    | -8.6221737 | -4.491951  | -7.5754219 |
| C    | -5.3835445 | -4.4098163 | -3.5026268 | C    | 0.0471614  | 6.2882811  | -5.4664906 |
| C    | -5.4356975 | -5.2076059 | -4.8222605 | C    | 0.7136245  | 7.371049   | -6.0209221 |
| C    | -4.295261  | -4.9028843 | -5.8345763 | C    | 2.0000278  | 7.7317432  | -5.5886808 |
| C    | -1.7623005 | -3.1525952 | -3.5696348 | C    | 2.650744   | 6.9951055  | -4.6090489 |
| C    | -1.7156147 | -2.6074468 | -2.3371546 | C    | 2.0118052  | 5.8882495  | -4.0417602 |
| O    | -2.8113404 | -2.6129639 | -1.5057227 | C    | -7.842269  | -5.7452218 | -7.9095266 |
| C    | -3.9493689 | -3.2079489 | -1.9334568 | O    | -8.6207033 | -1.5472033 | -5.384258  |
| C    | -0.5084597 | -1.9611149 | -1.6939993 | O    | -11.711113 | -2.8394376 | -8.7402838 |
| C    | -0.849215  | -0.6258327 | -1.0498923 | C    | -1.3205526 | 5.9571985  | -6.0215226 |
| C    | -0.9326374 | -0.5359618 | 0.2986577  | O    | 2.5666583  | 8.8147878  | -6.1852305 |
| C    | -0.6824528 | -1.6139967 | 1.3070091  | O    | 2.7106084  | 5.2104636  | -3.1174839 |
| C    | -0.4377235 | -3.0018668 | 0.6953956  | H    | -2.2328874 | -4.2761956 | -6.0294296 |
| C    | 0.2198888  | -2.9195562 | -0.6987207 | H    | -0.8764746 | -3.1096949 | -4.1954914 |
| C    | -1.0863129 | 0.5520314  | -1.8867927 | H    | -4.7420323 | -3.1631627 | -1.1972803 |
| C    | -1.3967684 | 1.7676134  | -1.1463174 | H    | 0.1962945  | -1.7765117 | -2.509171  |
| C    | -1.4490683 | 1.7487628  | 0.2025522  | H    | -1.53522   | -1.6623253 | 1.992162   |
| O    | -1.2317952 | 0.6422466  | 0.9404744  | H    | 0.1901356  | -1.3149576 | 1.8993466  |
| C    | -0.9969109 | 0.5589394  | -3.2506066 | H    | 0.2810664  | -3.5234282 | 1.3402025  |
| C    | -1.1647473 | 1.7622529  | -4.0474835 | H    | 0.234897   | -3.916124  | -1.1531176 |
| C    | -1.7860168 | 3.0095799  | -3.3666197 | H    | -1.667905  | 2.6206332  | 0.8061224  |
| C    | -1.6446865 | 3.0622317  | -1.8350698 | H    | -0.7387615 | -0.3281968 | -3.8157742 |
| O    | -1.2344805 | 4.1992601  | -3.9530329 | H    | -3.7943833 | 2.1668513  | -3.2972412 |
| C    | 0.0836943  | 4.3881535  | -3.7483088 | H    | -3.7310989 | 3.9483644  | -3.2835986 |
| C    | 0.685658   | 5.5276825  | -4.43717   | H    | -3.4034832 | 3.0426173  | -4.7940831 |
| C    | -3.2847105 | 3.0446349  | -3.7074946 | H    | -4.4332821 | -6.9528607 | -3.9825716 |
| O    | -6.7092995 | -5.010512  | -5.4502894 | H    | -6.2083371 | -6.9510735 | -3.8077729 |
| C    | -6.9576963 | -3.7185067 | -5.8091266 | H    | -5.4570458 | -7.2861758 | -5.3980947 |
| C    | -8.2135248 | -3.5666107 | -6.583999  | H    | 3.2263274  | -2.1200772 | -1.545829  |
| C    | -5.3789942 | -6.704252  | -4.4761081 | H    | -2.3475732 | -5.5379232 | 0.1708027  |
| O    | -6.3424827 | -4.3824568 | -2.7523137 | H    | -10.794735 | -1.3166392 | -6.8912072 |
| O    | -4.4406242 | -5.2331873 | -7.0064497 | H    | -10.09239  | -4.9407226 | -9.0786947 |
| O    | -1.8192844 | 4.1022521  | -1.2256493 | H    | 0.253253   | 7.9571926  | -6.8089193 |
| O    | -0.9096043 | 1.8098551  | -5.2438753 | H    | 3.6539651  | 7.2408794  | -4.2722716 |

|                                                               |            |            |            |   |            |              |            |
|---------------------------------------------------------------|------------|------------|------------|---|------------|--------------|------------|
| C                                                             | 1.6877042  | -2.5160647 | -0.5370874 | H | -8.1546856 | -6.1302749   | -8.8852894 |
| C                                                             | -1.6864782 | -3.8769853 | 0.7548449  | H | -6.7629156 | -5.5772024   | -7.9250456 |
| O                                                             | 2.2673095  | -2.3815656 | 0.5176269  | H | -8.027442  | -6.5259061   | -7.1631591 |
| O                                                             | 2.2993299  | -2.3630586 | -1.7322902 | H | -9.2828424 | -0.8411598   | -5.321154  |
| O                                                             | -1.5416175 | -5.0081912 | 0.0207956  | H | -11.86273  | -3.5476388   | -9.3857834 |
| O                                                             | -2.6665175 | -3.6610258 | 1.4295142  | H | -1.526578  | 6.5837622    | -6.8939991 |
| O                                                             | -6.1973214 | -2.8225626 | -5.4939301 | H | -1.3889499 | 4.9068536    | -6.3186946 |
| O                                                             | 0.7011244  | 3.6259679  | -2.9880945 | H | -2.1082102 | 6.1279407    | -5.2811241 |
| C                                                             | -9.0077172 | -2.415948  | -6.354837  | H | 3.4495223  | 8.9581991    | -5.8087218 |
| C                                                             | -10.179139 | -2.1926264 | -7.0767105 | H | 2.1573153  | 4.4346268    | -2.845196  |
| <b>NImag</b>                                                  |            |            |            |   |            | 0            |            |
| <b><math>\Sigma</math> Electronic and thermal Free Energy</b> |            |            |            |   |            | -1865689.919 |            |
| <b>mol Fraction</b>                                           |            |            |            |   |            | 3.24E-09     |            |

**(8S, 13R, 8aS, 12aR, 13aR)-Diazaphilonic acid - Conformer 15**

| Atom | X          | Y          | Z          | Atom | X          | Y          | Z          |
|------|------------|------------|------------|------|------------|------------|------------|
| C    | -3.3339863 | -4.3641288 | -5.1279749 | C    | -10.28636  | -3.2424732 | -8.5963147 |
| C    | -3.1721038 | -3.7402747 | -3.9200346 | C    | -10.123976 | -2.1995755 | -7.6719874 |
| C    | -4.2757378 | -3.5451989 | -2.9907678 | C    | -9.0937351 | -2.2387445 | -6.7427776 |
| C    | -5.6426471 | -4.0573833 | -3.2896408 | C    | 0.0322516  | 6.0330714  | -5.8482134 |
| C    | -5.7703699 | -4.9510535 | -4.5371548 | C    | 0.688062   | 7.0566565  | -6.5197642 |
| C    | -4.626109  | -4.8242112 | -5.5736425 | C    | 2.023072   | 7.3853589  | -6.2284235 |
| C    | -1.9102715 | -3.1924649 | -3.4661608 | C    | 2.7350423  | 6.6734624  | -5.2748622 |
| C    | -1.7936122 | -2.5583998 | -2.2799259 | C    | 2.1097405  | 5.6263043  | -4.5948518 |
| O    | -2.8757499 | -2.3838672 | -1.4521197 | C    | -8.947293  | -1.0950448 | -5.7647785 |
| C    | -4.0733108 | -2.8826595 | -1.8303373 | O    | -7.5509238 | -5.4536944 | -7.8097956 |
| C    | -0.5142388 | -2.0059554 | -1.691016  | O    | -11.319718 | -3.1306818 | -9.4778417 |
| C    | -0.7120588 | -0.633911  | -1.0616055 | C    | -1.3928472 | 5.7336592  | -6.2581585 |
| C    | -0.6273671 | -0.4847789 | 0.2809784  | O    | 2.6686717  | 8.3936047  | -6.8741859 |
| C    | -0.315642  | -1.541344  | 1.2966504  | O    | 2.8633216  | 4.9632854  | -3.7038023 |
| C    | -0.3665196 | -2.9628337 | 0.7270461  | H    | -2.5111685 | -4.4441482 | -5.8316648 |
| C    | 0.1709607  | -3.0146053 | -0.7236649 | H    | -1.0313446 | -3.2884999 | -4.0957953 |
| C    | -0.9765977 | 0.5269365  | -1.9157988 | H    | -4.8520677 | -2.6910769 | -1.1026389 |
| C    | -1.1454445 | 1.782983   | -1.1971531 | H    | 0.1822037  | -1.889656  | -2.5277391 |
| C    | -1.0354684 | 1.8191074  | 0.1474556  | H    | -1.0219474 | -1.4504531 | 2.1275293  |
| O    | -0.7812951 | 0.7310697  | 0.9022453  | H    | 0.68308    | -1.3392792 | 1.7060355  |
| C    | -1.0336955 | 0.4808092  | -3.280097  | H    | 0.2863362  | -3.6018317 | 1.3326717  |
| C    | -1.2379963 | 1.6615341  | -4.1030341 | H    | 0.0085103  | -4.0274483 | -1.1113448 |
| C    | -1.7245487 | 2.961834   | -3.4116825 | H    | -1.1388563 | 2.723333   | 0.7338729  |
| C    | -1.4155884 | 3.0621375  | -1.9074169 | H    | -0.8695799 | -0.4359185 | -3.8327054 |
| O    | -1.1847905 | 4.0993862  | -4.1023228 | H    | -3.7507404 | 2.2258396  | -3.0932022 |
| C    | 0.1563494  | 4.227885   | -4.042054  | H    | -3.6031242 | 4.000654   | -3.1614784 |
| C    | 0.7360823  | 5.302811   | -4.8442142 | H    | -3.4840338 | 3.0246618  | -4.6590186 |
| C    | -3.2479543 | 3.0605647  | -3.5923677 | H    | -4.9150228 | -6.6955452 | -3.5410105 |
| O    | -7.0021559 | -4.7145518 | -5.2210918 | H    | -6.6837341 | -6.5249862 | -3.3788882 |
| C    | -7.1542214 | -3.4355801 | -5.7018233 | H    | -5.9698354 | -7.0682922 | -4.9252498 |
| C    | -8.2202512 | -3.3601626 | -6.7119589 | H    | 3.2838339  | -3.2065481 | 0.1218539  |
| C    | -5.836513  | -6.4128442 | -4.0606079 | H    | -2.72958   | -5.1302921 | 0.453745   |
| O    | -6.581526  | -3.8896081 | -2.5336659 | H    | -9.5007429 | -5.1207509 | -9.3424015 |
| O    | -4.8594996 | -5.1756319 | -6.7326043 | H    | -10.818711 | -1.3668339 | -7.6979947 |
| O    | -1.4831738 | 4.1291754  | -1.3242422 | H    | 0.1601964  | 7.6097548  | -7.2939468 |
| O    | -1.1178727 | 1.6519895  | -5.3211279 | H    | 3.7710214  | 6.9074777  | -5.0609798 |

|                                                               |            |            |            |   |            |              |            |
|---------------------------------------------------------------|------------|------------|------------|---|------------|--------------|------------|
| C                                                             | 1.6900547  | -2.8113022 | -0.7910722 | H | -9.7897985 | -0.4042317   | -5.8611235 |
| C                                                             | -1.7498284 | -3.5870798 | 0.9003242  | H | -8.9071481 | -1.4465193   | -4.7281645 |
| O                                                             | 2.2800058  | -2.2941839 | -1.7111313 | H | -8.019072  | -0.5429072   | -5.9406014 |
| O                                                             | 2.3289239  | -3.3349956 | 0.2811159  | H | -6.7447912 | -5.378741    | -7.2536619 |
| O                                                             | -1.8509534 | -4.7649995 | 0.2361535  | H | -11.323078 | -3.9080403   | -10.058455 |
| O                                                             | -2.6356856 | -3.1526608 | 1.5985313  | H | -1.6533415 | 6.3150013    | -7.147678  |
| O                                                             | -6.4507015 | -2.5287252 | -5.2920479 | H | -1.5312124 | 4.671862     | -6.4803723 |
| O                                                             | 0.8110691  | 3.4689245  | -3.31194   | H | -2.1022262 | 5.985186     | -5.4636957 |
| C                                                             | -8.3716044 | -4.3925392 | -7.6763707 | H | 2.0620429  | 8.7985602    | -7.5140036 |
| C                                                             | -9.4149412 | -4.3246024 | -8.6078296 | H | 2.3139567  | 4.2216197    | -3.3464572 |
| <b>NImag</b>                                                  |            |            |            |   |            | 0            |            |
| <b><math>\Sigma</math> Electronic and thermal Free Energy</b> |            |            |            |   |            | -1865696.967 |            |
| <b>mol Fraction</b>                                           |            |            |            |   |            | 0.000481403  |            |

## (8S, 13R, 8aS, 12aR, 13aR)-Diazaphilonic acid - Conformer 16

| Atom | X          | Y          | Z          | Atom | X          | Y          | Z          |
|------|------------|------------|------------|------|------------|------------|------------|
| C    | -2.9074598 | -4.3881068 | -5.2746198 | C    | -10.171721 | -2.8080786 | -8.4571644 |
| C    | -2.8561782 | -3.7949371 | -4.0468132 | C    | -9.8186957 | -4.1495156 | -8.236027  |
| C    | -4.0260249 | -3.6934047 | -3.1837148 | C    | -8.7132063 | -4.483672  | -7.4685648 |
| C    | -5.3399157 | -4.2565632 | -3.5945335 | C    | 1.5143937  | 6.2415279  | -4.2602499 |
| C    | -5.3459104 | -5.1271426 | -4.8666717 | C    | 1.9619047  | 7.1800798  | -5.1829851 |
| C    | -4.1329034 | -4.9410757 | -5.8228489 | C    | 1.4841059  | 7.1682719  | -6.5030354 |
| C    | -1.6580426 | -3.1940377 | -3.4910805 | C    | 0.566509   | 6.2123004  | -6.9181004 |
| C    | -1.65345   | -2.6015204 | -2.2795736 | C    | 0.0953974  | 5.2608091  | -6.0081382 |
| O    | -2.7952097 | -2.5172512 | -1.5154478 | C    | -8.3927972 | -5.9542554 | -7.3161533 |
| C    | -3.936586  | -3.0656123 | -1.9908061 | O    | -7.5715599 | -1.0345212 | -6.7092272 |
| C    | -0.4479265 | -2.0037032 | -1.5877949 | O    | -11.277879 | -2.5824292 | -9.2149135 |
| C    | -0.7645727 | -0.6711471 | -0.9217277 | C    | 2.0546398  | 6.2856435  | -2.8487161 |
| C    | -0.7715286 | -0.5722788 | 0.4293822  | O    | 1.9072773  | 8.0759738  | -7.4284215 |
| C    | -0.4599626 | -1.6503866 | 1.4220991  | O    | -0.7472863 | 4.3410642  | -6.5183805 |
| C    | -0.3967902 | -3.0481476 | 0.7981927  | H    | -2.0350281 | -4.4147695 | -5.9206481 |
| C    | 0.2321062  | -3.0112438 | -0.6157971 | H    | -0.73652   | -3.2189058 | -4.0643668 |
| C    | -1.0448957 | 0.5067076  | -1.7438471 | H    | -4.7701896 | -2.9429824 | -1.3104952 |
| C    | -1.3309793 | 1.7206477  | -0.9930039 | H    | 0.2929381  | -1.8144659 | -2.3712904 |
| C    | -1.3072004 | 1.7067944  | 0.356588   | H    | -1.2174452 | -1.6311829 | 2.2115662  |
| O    | -1.0356732 | 0.6048994  | 1.0829848  | H    | 0.5003371  | -1.4104035 | 1.8977295  |
| C    | -1.0098684 | 0.5112603  | -3.1137727 | H    | 0.2515166  | -3.6757481 | 1.4203132  |
| C    | -1.205611  | 1.7185491  | -3.8824801 | H    | 0.1513856  | -4.014646  | -1.0505776 |
| C    | -1.8357836 | 2.9487386  | -3.1927607 | H    | -1.5017232 | 2.5784674  | 0.9685456  |
| C    | -1.6411992 | 3.0122767  | -1.6694178 | H    | -0.7450346 | -0.3686437 | -3.6861919 |
| O    | -1.3248004 | 4.1182963  | -3.8347163 | H    | -3.8277144 | 2.0667207  | -3.0338171 |
| C    | 0.0252002  | 4.3171783  | -3.6793854 | H    | -3.7894747 | 3.8496697  | -3.0411301 |
| C    | 0.5444696  | 5.2865229  | -4.6574772 | H    | -3.5158154 | 2.9379581  | -4.5543065 |
| C    | -3.3492576 | 2.9474978  | -3.4739379 | H    | -4.4902881 | -6.8609196 | -3.8633416 |
| O    | -6.5634126 | -4.913735  | -5.5985132 | H    | -6.2703269 | -6.7696302 | -3.8079435 |
| C    | -6.7554228 | -3.654138  | -6.0408383 | H    | -5.4347741 | -7.2326339 | -5.3233771 |
| C    | -7.9208329 | -3.4403591 | -6.8938393 | H    | 3.2927699  | -3.0883851 | 0.415749   |
| C    | -5.3889786 | -6.6008043 | -4.4326956 | H    | -2.6166427 | -5.3222865 | 0.2919616  |
| O    | -6.3453829 | -4.1275377 | -2.9194299 | H    | -9.6447254 | -0.7325082 | -8.1057438 |
| O    | -4.2347966 | -5.3385691 | -6.9762316 | H    | -10.429144 | -4.9226671 | -8.6899303 |
| O    | -1.8445536 | 4.0388572  | -1.0481659 | H    | 2.6863742  | 7.9324799  | -4.8774037 |
| O    | -0.9420836 | 1.7986106  | -5.08396   | H    | 0.2271094  | 6.1805745  | -7.9466998 |

|                                                               |            |            |            |   |            |              |            |
|---------------------------------------------------------------|------------|------------|------------|---|------------|--------------|------------|
| C                                                             | 1.7382627  | -2.7236376 | -0.5746227 | H | -9.0481449 | -6.5438208   | -7.9635963 |
| C                                                             | -1.7522256 | -3.7500161 | 0.8587356  | H | -7.3530247 | -6.1674841   | -7.5801661 |
| O                                                             | 2.3536738  | -2.1217319 | -1.4237135 | H | -8.5329884 | -6.2925288   | -6.2847335 |
| O                                                             | 2.3385861  | -3.2756886 | 0.5058259  | H | -6.7788074 | -1.3961205   | -6.2382579 |
| O                                                             | -1.7460962 | -4.9047202 | 0.1488016  | H | -11.411393 | -1.6253198   | -9.3044408 |
| O                                                             | -2.7021467 | -3.3893882 | 1.5134668  | H | 2.6794376  | 7.1727056    | -2.7074903 |
| O                                                             | -5.970416  | -2.7593661 | -5.6900966 | H | 1.2513565  | 6.3099702    | -2.1046851 |
| O                                                             | 0.6500977  | 3.7257749  | -2.8163817 | H | 2.6536037  | 5.3969129    | -2.6280628 |
| C                                                             | -8.2754187 | -2.0815406 | -7.1658257 | H | 2.5514543  | 8.6699639    | -7.0124589 |
| C                                                             | -9.4055537 | -1.7777243 | -7.9311618 | H | -0.925978  | 3.6057021    | -5.8933463 |
| <b>NImag</b>                                                  |            |            |            |   |            | 0            |            |
| <b><math>\Sigma</math> Electronic and thermal Free Energy</b> |            |            |            |   |            | -1865696.729 |            |
| <b>mol Fraction</b>                                           |            |            |            |   |            | 0.000322098  |            |



**(8S, 13R, 8aS, 12aR, 13aR)-Diazaphilonic acid - Conformer 17**

| Atom | X          | Y          | Z          | Atom | X          | Y          | Z          |
|------|------------|------------|------------|------|------------|------------|------------|
| C    | -3.2023899 | -4.2041094 | -5.1892554 | C    | -10.141195 | -3.0055777 | -8.6695463 |
| C    | -3.0622239 | -3.6399274 | -3.9502479 | C    | -9.9883734 | -2.0016253 | -7.7000393 |
| C    | -4.178481  | -3.5064061 | -3.02477   | C    | -8.9622874 | -2.0708408 | -6.765085  |
| C    | -5.5360378 | -4.0177575 | -3.3662281 | C    | 1.7015024  | 6.2041184  | -4.223943  |
| C    | -5.6380301 | -4.8509236 | -4.6570449 | C    | 2.1465138  | 7.134677   | -5.1527558 |
| C    | -4.4837401 | -4.659063  | -5.6724192 | C    | 1.598616   | 7.1666169  | -6.4439574 |
| C    | -1.8128765 | -3.0987736 | -3.4547183 | C    | 0.6127773  | 6.2629286  | -6.8207401 |
| C    | -1.7173877 | -2.527078  | -2.2355869 | C    | 0.1408643  | 5.3188487  | -5.9004407 |
| O    | -2.80971   | -2.4111098 | -1.4107312 | C    | -8.8305039 | -0.967058  | -5.7402763 |
| C    | -3.9971528 | -2.9038214 | -1.828926  | O    | -7.393033  | -5.2232684 | -7.9627543 |
| C    | -0.451188  | -1.9903586 | -1.6047986 | O    | -11.13751  | -2.9615537 | -9.5985947 |
| C    | -0.6760215 | -0.6617035 | -0.8953987 | C    | 2.3163899  | 6.1968864  | -2.842653  |
| C    | -0.5953859 | -0.590664  | 0.4551741  | O    | 2.08897    | 8.107538   | -7.2995723 |
| C    | -0.2643356 | -1.7002913 | 1.4059326  | O    | -0.7731685 | 4.4531717  | -6.3826285 |
| C    | -0.2983253 | -3.0858809 | 0.7534456  | H    | -2.3710289 | -4.239088  | -5.8865795 |
| C    | 0.2442846  | -3.0450846 | -0.6955454 | H    | -0.9262394 | -3.1501077 | -4.078849  |
| C    | -0.9608411 | 0.5422649  | -1.6768791 | H    | -4.7861463 | -2.760281  | -1.1012087 |
| C    | -1.1547367 | 1.7498589  | -0.8877032 | H    | 0.249358   | -1.812627  | -2.4272    |
| C    | -1.0481887 | 1.7073845  | 0.4572565  | H    | -0.9681706 | -1.6676244 | 2.2431182  |
| O    | -0.7734645 | 0.5814205  | 1.1449524  | H    | 0.7335092  | -1.5083616 | 1.8223187  |
| C    | -1.0090943 | 0.5735392  | -3.0461197 | H    | 0.3592056  | -3.7529283 | 1.3225471  |
| C    | -1.2026871 | 1.8029714  | -3.7791646 | H    | 0.095891   | -4.0352114 | -1.1427894 |
| C    | -1.7399312 | 3.0428877  | -3.0310177 | H    | -1.1717489 | 2.5726263  | 1.0961673  |
| C    | -1.4587411 | 3.0653581  | -1.5198088 | H    | -0.8122779 | -0.3033143 | -3.6499095 |
| O    | -1.2134387 | 4.2030892  | -3.6776173 | H    | -3.7567463 | 2.2431334  | -2.7793358 |
| C    | 0.1513229  | 4.339704   | -3.5905009 | H    | -3.6405379 | 4.0225685  | -2.7522632 |
| C    | 0.6626814  | 5.301351   | -4.5793468 | H    | -3.4906545 | 3.1342922  | -4.2967596 |
| C    | -3.2649216 | 3.1125223  | -3.2273743 | H    | -4.7715523 | -6.6316772 | -3.7375355 |
| O    | -6.864771  | -4.5961695 | -5.3432173 | H    | -6.5441298 | -6.4913322 | -3.5884554 |
| C    | -7.0265818 | -3.2980466 | -5.764738  | H    | -5.8058329 | -6.9485885 | -5.1509587 |
| C    | -8.0847171 | -3.185534  | -6.7795566 | H    | 3.3567525  | -3.2583688 | 0.1455671  |
| C    | -5.6907062 | -6.335114  | -4.2535497 | H    | -2.6388299 | -5.2566072 | 0.3443161  |
| O    | -6.4859891 | -3.8957231 | -2.6153926 | H    | -9.3581871 | -4.8336113 | -9.4969453 |
| O    | -4.6987253 | -4.9559138 | -6.8493609 | H    | -10.68081  | -1.1624353 | -7.6778678 |
| O    | -1.5931961 | 4.0838153  | -0.8674276 | H    | 2.9197021  | 7.8511309  | -4.8964182 |
| O    | -1.007732  | 1.8972514  | -4.9928497 | H    | 0.2057773  | 6.2467611  | -7.8281664 |

|                                                               |            |            |            |   |            |              |            |
|---------------------------------------------------------------|------------|------------|------------|---|------------|--------------|------------|
| C                                                             | 1.7609456  | -2.818829  | -0.7439483 | H | -9.6800561 | -0.2810132   | -5.8085245 |
| C                                                             | -1.6767391 | -3.7315377 | 0.883212   | H | -8.7880842 | -1.3603551   | -4.7190954 |
| O                                                             | 2.3464227  | -2.2314447 | -1.6237659 | H | -7.9083051 | -0.3977789   | -5.8909869 |
| O                                                             | 2.4027826  | -3.4079643 | 0.2915941  | H | -6.5926524 | -5.1628921   | -7.3981353 |
| O                                                             | -1.7624708 | -4.8711147 | 0.1539788  | H | -11.660317 | -2.1563154   | -9.4601139 |
| O                                                             | -2.5703626 | -3.3436065 | 1.5986311  | H | 2.9945635  | 7.0469877    | -2.7253978 |
| O                                                             | -6.3373018 | -2.4038551 | -5.3051446 | H | 1.5554001  | 6.2528995    | -2.0567983 |
| O                                                             | 0.7914523  | 3.7041734  | -2.7710782 | H | 2.8768486  | 5.273887     | -2.6656287 |
| C                                                             | -8.226003  | -4.1773856 | -7.7917908 | H | 1.6307837  | 8.0271058    | -8.1510544 |
| C                                                             | -9.2634302 | -4.0802468 | -8.7238742 | H | -0.9545847 | 3.7137924    | -5.7624697 |
| <b>NImag</b>                                                  |            |            |            |   |            | 0            |            |
| <b><math>\Sigma</math> Electronic and thermal Free Energy</b> |            |            |            |   |            | -1865694.384 |            |
| <b>mol Fraction</b>                                           |            |            |            |   |            | 6.13E-06     |            |

**(8S, 13R, 8aS, 12aR, 13aR)-Diazaphilonic acid - Conformer 18**

| Atom | X          | Y          | Z          | Atom | X          | Y          | Z          |
|------|------------|------------|------------|------|------------|------------|------------|
| C    | -3.2899048 | -4.4986101 | -5.2016314 | C    | -10.749311 | -3.0758096 | -7.9952242 |
| C    | -3.1765707 | -3.8848289 | -3.988021  | C    | -10.364876 | -4.4073826 | -7.7678853 |
| C    | -4.2968966 | -3.7811249 | -3.0618145 | C    | -9.2120208 | -4.7107262 | -7.0593325 |
| C    | -5.625448  | -4.3631788 | -3.3899121 | C    | 0.2210903  | 5.9418252  | -5.9260645 |
| C    | -5.6917422 | -5.2566388 | -4.6444543 | C    | 0.942778   | 6.9515609  | -6.5493317 |
| C    | -4.5378016 | -5.0726211 | -5.6713574 | C    | 2.2452575  | 7.2816103  | -6.1373127 |
| C    | -1.9555873 | -3.2627266 | -3.5111594 | C    | 2.8596523  | 6.584477   | -5.1078737 |
| C    | -1.8905729 | -2.6464868 | -2.3134294 | C    | 2.1673685  | 5.5513995  | -4.4729535 |
| O    | -2.9879904 | -2.5618129 | -1.4875125 | C    | -8.8625364 | -6.1734667 | -6.8958512 |
| C    | -4.1470937 | -3.1334671 | -1.8854391 | O    | -8.0767105 | -1.231902  | -6.4391003 |
| C    | -0.6606841 | -2.008826  | -1.7056317 | O    | -11.900938 | -2.8805562 | -8.6914087 |
| C    | -0.9527248 | -0.6323643 | -1.1275293 | C    | -1.1595101 | 5.6390652  | -6.4653476 |
| C    | -1.0171524 | -0.4703573 | 0.2154998  | O    | 2.9542976  | 8.2763454  | -6.7354846 |
| C    | -0.7942184 | -1.5038857 | 1.2754518  | O    | 2.8291142  | 4.9015206  | -3.5024798 |
| C    | -0.6098108 | -2.9289769 | 0.7327557  | H    | -2.454609  | -4.5270196 | -5.8949349 |
| C    | 0.040429   | -2.9415306 | -0.6671338 | H    | -1.0672523 | -3.2907506 | -4.1342717 |
| C    | -1.1589808 | 0.5085427  | -2.0215884 | H    | -4.939958  | -3.0119548 | -1.1579994 |
| C    | -1.4096433 | 1.7723061  | -1.3421095 | H    | 0.0459122  | -1.8878879 | -2.5312285 |
| C    | -1.446751  | 1.8247117  | 0.006391   | H    | -1.6391537 | -1.484218  | 1.9716082  |
| O    | -1.2660573 | 0.7490594  | 0.798012   | H    | 0.0968505  | -1.2089265 | 1.8416996  |
| C    | -1.0937113 | 0.4400423  | -3.3852543 | H    | 0.0920272  | -3.4469276 | 1.3987574  |
| C    | -1.227992  | 1.6048541  | -4.242679  | H    | 0.0164823  | -3.9598353 | -1.0700883 |
| C    | -1.7744296 | 2.9160034  | -3.6200002 | H    | -1.622791  | 2.734443   | 0.5665102  |
| C    | -1.6123256 | 3.0393414  | -2.0943507 | H    | -0.880445  | -0.4853772 | -3.9060622 |
| O    | -1.1652377 | 4.0419847  | -4.2721984 | H    | -3.8247257 | 2.1911912  | -3.4869733 |
| C    | 0.16407    | 4.167272   | -4.0865944 | H    | -3.6635567 | 3.9640614  | -3.5684348 |
| C    | 0.8224687  | 5.2272948  | -4.8469281 | H    | -3.4049504 | 2.9640627  | -5.0323081 |
| C    | -3.2725979 | 3.0163321  | -3.9485676 | H    | -4.7563505 | -6.9600593 | -3.6605807 |
| O    | -6.9518885 | -5.0728206 | -5.3092384 | H    | -6.5314643 | -6.8914206 | -3.5060715 |
| C    | -7.1865444 | -3.8257362 | -5.765031  | H    | -5.7762517 | -7.3714432 | -5.0579369 |
| C    | -8.4026686 | -3.6453209 | -6.5532118 | H    | 3.0668188  | -2.2915786 | -1.5708655 |
| C    | -5.6892851 | -6.7225554 | -4.1826985 | H    | -2.6189982 | -5.4125984 | 0.3501208  |
| O    | -6.5946775 | -4.2298462 | -2.6646466 | H    | -10.232507 | -0.9865665 | -7.7175421 |
| O    | -4.7006722 | -5.4889349 | -6.8111393 | H    | -10.989626 | -5.1979492 | -8.1692919 |
| O    | -1.7372769 | 4.1151861  | -1.537401  | H    | 0.4938581  | 7.4924514  | -7.3798803 |
| O    | -0.999363  | 1.575865   | -5.4453859 | H    | 3.8712733  | 6.8197298  | -4.7995676 |

|                                                               |            |            |            |   |            |              |            |
|---------------------------------------------------------------|------------|------------|------------|---|------------|--------------|------------|
| C                                                             | 1.5233211  | -2.5842918 | -0.5340542 | H | -9.5455889 | -6.7850402   | -7.4922325 |
| C                                                             | -1.8924396 | -3.7485282 | 0.8402458  | H | -7.8367336 | -6.3785787   | -7.2151137 |
| O                                                             | 2.1152337  | -2.4229295 | 0.5098338  | H | -8.9383534 | -6.4917343   | -5.8514272 |
| O                                                             | 2.1299589  | -2.5090146 | -1.7389699 | H | -7.2539668 | -1.5742637   | -6.0062401 |
| O                                                             | -1.7948162 | -4.9225393 | 0.167805   | H | -12.054157 | -1.9273605   | -8.7903309 |
| O                                                             | -2.8620275 | -3.4572033 | 1.5014605  | H | -1.331066  | 6.2051587    | -7.3857612 |
| O                                                             | -6.3956719 | -2.9132016 | -5.4795671 | H | -1.280778  | 4.5738231    | -6.6809554 |
| O                                                             | 0.7436476  | 3.4179935  | -3.2857694 | H | -1.9405013 | 5.9067614    | -5.7469724 |
| C                                                             | -8.791607  | -2.2974417 | -6.8319759 | H | 2.4130342  | 8.6732027    | -7.4361351 |
| C                                                             | -9.9684549 | -2.0246266 | -7.5361311 | H | 2.2424108  | 4.1702746    | -3.1852175 |
| <b>NImag</b>                                                  |            |            |            |   |            | 0            |            |
| <b><math>\Sigma</math> Electronic and thermal Free Energy</b> |            |            |            |   |            | -1865700.372 |            |
| <b>mol Fraction</b>                                           |            |            |            |   |            | 0.151727215  |            |

## (8S, 13R, 8aS, 12aR, 13aR)-Diazaphilonic acid - Conformer 19

| Atom | X          | Y          | Z          | Atom | X          | Y          | Z          |
|------|------------|------------|------------|------|------------|------------|------------|
| C    | -4.0851506 | -5.2717209 | -4.8596236 | C    | -4.2301793 | -1.4762734 | -6.7887743 |
| C    | -3.8830171 | -4.3220721 | -3.9026066 | C    | -4.556622  | -2.6490154 | -7.4939208 |
| C    | -4.9803391 | -3.7537275 | -3.1332432 | C    | -5.7371304 | -3.3351981 | -7.2380486 |
| C    | -6.3919293 | -4.0916385 | -3.4475688 | C    | -1.3862967 | 5.8514204  | -6.1478409 |
| C    | -6.651303  | -5.237063  | -4.4543637 | C    | -0.8511813 | 6.8530167  | -6.942585  |
| C    | -5.4024224 | -5.7663087 | -5.219382  | C    | 0.5367541  | 6.9796991  | -7.119749  |
| C    | -2.5841252 | -3.7734387 | -3.5665852 | C    | 1.4119143  | 6.0929201  | -6.5097294 |
| C    | -2.4230279 | -2.8861765 | -2.5636979 | C    | 0.9048249  | 5.0661806  | -5.7075131 |
| O    | -3.4880168 | -2.4399823 | -1.8158892 | C    | -6.1315209 | -4.4828645 | -8.1424347 |
| C    | -4.7313455 | -2.8585668 | -2.1515238 | O    | -7.212955  | -1.0006312 | -4.7753191 |
| C    | -1.0893161 | -2.3169614 | -2.1152521 | O    | -3.0307111 | -0.9142539 | -7.0436669 |
| C    | -1.1989264 | -0.9515697 | -1.4473847 | C    | -2.8935449 | 5.791127   | -6.0371769 |
| C    | -0.8575443 | -0.8062165 | -0.1427787 | O    | 0.9617526  | 7.99692    | -7.9137661 |
| C    | -0.3904511 | -1.8738654 | 0.7982253  | O    | 1.8128357  | 4.2438915  | -5.1614237 |
| C    | -0.6286389 | -3.2808942 | 0.2489768  | H    | -3.2527172 | -5.6839983 | -5.4220743 |
| C    | -0.2902923 | -3.3425424 | -1.2598858 | H    | -1.7135921 | -4.0822494 | -4.1372916 |
| C    | -1.6255439 | 0.2151585  | -2.2209969 | H    | -5.5032033 | -2.3922225 | -1.5525639 |
| C    | -1.5963856 | 1.4730221  | -1.4927744 | H    | -0.4962166 | -2.176834  | -3.0264859 |
| C    | -1.2208377 | 1.5048693  | -0.1955919 | H    | -0.9114288 | -1.748319  | 1.751988   |
| O    | -0.8704267 | 0.4075516  | 0.4965909  | H    | 0.6794639  | -1.7247567 | 0.9963609  |
| C    | -2.0074048 | 0.1723518  | -3.5383216 | H    | 0.0372887  | -3.9820794 | 0.7640415  |
| C    | -2.4114235 | 1.3485524  | -4.2694493 | H    | -0.5269467 | -4.3501127 | -1.6201928 |
| C    | -2.6417669 | 2.6745351  | -3.5096713 | H    | -1.1726731 | 2.4116508  | 0.394129   |
| C    | -1.9521358 | 2.7635018  | -2.1393286 | H    | -2.000896  | -0.7506591 | -4.1066404 |
| O    | -2.2480065 | 3.7838188  | -4.3304662 | H    | -4.5536117 | 2.0342036  | -2.675049  |
| C    | -0.9300955 | 3.8437905  | -4.620206  | H    | -4.3387801 | 3.7999505  | -2.7884019 |
| C    | -0.5047804 | 4.9296676  | -5.496047  | H    | -4.6594499 | 2.8336964  | -4.2603723 |
| C    | -4.1549785 | 2.8467023  | -3.2910072 | H    | -6.4887226 | -6.7979587 | -2.933248  |
| O    | -7.7214032 | -4.8654751 | -5.3544366 | H    | -8.1221655 | -6.0995081 | -3.1299921 |
| C    | -7.8367015 | -3.5593321 | -5.7812252 | H    | -7.4595797 | -7.223136  | -4.3623595 |
| C    | -6.6120822 | -2.8529807 | -6.2280883 | H    | 2.8899018  | -3.7235973 | -0.8767301 |
| C    | -7.2218181 | -6.4234516 | -3.6570589 | H    | -3.2008161 | -5.2161561 | 0.2645743  |
| O    | -7.3246125 | -3.5228724 | -2.9039349 | H    | -4.9577013 | 0.0224981  | -5.3985969 |
| O    | -5.5663265 | -6.6354069 | -6.0683002 | H    | -3.8717586 | -2.9957594 | -8.2614484 |
| O    | -1.7997433 | 3.8351475  | -1.582511  | H    | -1.4992397 | 7.5592208  | -7.4500269 |
| O    | -2.6815038 | 1.3404711  | -5.4760671 | H    | 2.488284   | 6.1619817  | -6.6388986 |

|                                                               |            |            |            |   |            |              |            |
|---------------------------------------------------------------|------------|------------|------------|---|------------|--------------|------------|
| C                                                             | 1.2103299  | -3.1692667 | -1.5154713 | H | -5.2509581 | -5.026747    | -8.4954963 |
| C                                                             | -2.0399813 | -3.7667883 | 0.5748835  | H | -6.7949526 | -5.2002173   | -7.659802  |
| O                                                             | 1.6966631  | -2.5522589 | -2.4346142 | H | -6.6505121 | -4.0810656   | -9.0230085 |
| O                                                             | 1.9580632  | -3.8422473 | -0.609804  | H | -8.0728211 | -1.4620227   | -4.836804  |
| O                                                             | -2.3082259 | -4.9493165 | -0.0271957 | H | -2.9072886 | -0.0931095   | -6.5102565 |
| O                                                             | -2.8164643 | -3.2157722 | 1.3196483  | H | -3.3416065 | 6.5528452    | -6.6811465 |
| O                                                             | -8.9328859 | -3.0359909 | -5.7266254 | H | -3.2803336 | 4.8123008    | -6.3350017 |
| O                                                             | -0.1661953 | 2.9983354  | -4.126918  | H | -3.2306067 | 5.9651572    | -5.010879  |
| C                                                             | -6.3503187 | -1.5878785 | -5.6409197 | H | 1.9307829  | 7.9779759    | -7.9648775 |
| C                                                             | -5.1475752 | -0.9264665 | -5.8866104 | H | 1.3175577  | 3.5569686    | -4.6473923 |
| <b>NImag</b>                                                  |            |            |            |   |            | 0            |            |
| <b><math>\Sigma</math> Electronic and thermal Free Energy</b> |            |            |            |   |            | -1865686.219 |            |
| <b>mol Fraction</b>                                           |            |            |            |   |            | 6.24E-12     |            |

**(8S, 13R, 8aS, 12aR, 13aR)-Diazaphilonic acid - Conformer 20**

| Atom | X          | Y          | Z          | Atom | X          | Y          | Z          |
|------|------------|------------|------------|------|------------|------------|------------|
| C    | -4.2289212 | -4.8662469 | -4.9457838 | C    | -4.3586392 | -1.1695486 | -6.8283691 |
| C    | -3.9570056 | -4.0913202 | -3.8586442 | C    | -4.7410842 | -2.1354039 | -7.771543  |
| C    | -4.9806806 | -3.7225481 | -2.8892554 | C    | -5.8615296 | -2.9389776 | -7.5728136 |
| C    | -6.4070446 | -4.1224723 | -3.0797448 | C    | -1.4020517 | 6.0204762  | -5.6689032 |
| C    | -6.745396  | -5.0050783 | -4.3081097 | C    | -0.8723381 | 7.0370387  | -6.4475167 |
| C    | -5.5659193 | -5.3302723 | -5.2697154 | C    | 0.5084777  | 7.1236691  | -6.693295  |
| C    | -2.6411329 | -3.5612201 | -3.5582977 | C    | 1.3812216  | 6.1815783  | -6.1683432 |
| C    | -2.399019  | -2.8465962 | -2.4414973 | C    | 0.8791085  | 5.1389587  | -5.3841913 |
| O    | -3.3880572 | -2.5780582 | -1.5238265 | C    | -6.269308  | -3.9306714 | -8.6348758 |
| C    | -4.6461049 | -3.0126901 | -1.7900744 | O    | -7.0460201 | -1.6464229 | -4.3664498 |
| C    | -1.0446629 | -2.290809  | -2.045418  | O    | -3.2449771 | -0.4485423 | -7.0807963 |
| C    | -1.1309157 | -0.9668283 | -1.2984263 | C    | -2.9025513 | 6.008375   | -5.4795136 |
| C    | -0.7574233 | -0.8993507 | 0.0046619  | O    | 0.9277882  | 8.159422   | -7.464843  |
| C    | -0.2718248 | -2.016515  | 0.8728071  | O    | 1.7835471  | 4.2632187  | -4.9210453 |
| C    | -0.4512547 | -3.3958631 | 0.2311318  | H    | -3.4474526 | -5.1365144 | -5.6494696 |
| C    | -0.180552  | -3.3507471 | -1.2866384 | H    | -1.8265829 | -3.7364574 | -4.2545215 |
| C    | -1.5907205 | 0.2366132  | -1.9890091 | H    | -5.3537295 | -2.725095  | -1.0224317 |
| C    | -1.5208127 | 1.4558667  | -1.2020011 | H    | -0.5271913 | -2.0990628 | -2.9909384 |
| C    | -1.1069904 | 1.4150573  | 0.0840154  | H    | -0.8109005 | -1.9753542 | 1.8243521  |
| O    | -0.7527376 | 0.2792146  | 0.7075628  | H    | 0.7894696  | -1.8482842 | 1.088805   |
| C    | -2.0405046 | 0.2581772  | -3.2862156 | H    | 0.2953843  | -4.0716966 | 0.6659258  |
| C    | -2.4795951 | 1.4655504  | -3.9397052 | H    | -0.4111115 | -4.327897  | -1.724222  |
| C    | -2.6344934 | 2.7651026  | -3.1151706 | H    | -1.0303646 | 2.2887261  | 0.7191853  |
| C    | -1.8813297 | 2.779405   | -1.7741255 | H    | -2.0746537 | -0.6390516 | -3.8927922 |
| O    | -2.24597   | 3.8961051  | -3.9087592 | H    | -4.5192829 | 2.154508   | -2.2054057 |
| C    | -0.9409461 | 3.9312893  | -4.2570183 | H    | -4.2622161 | 3.9149584  | -2.2812663 |
| C    | -0.5221201 | 5.0404935  | -5.1048649 | H    | -4.6781998 | 3.0028706  | -3.7645117 |
| C    | -4.129435  | 2.9730682  | -2.8198136 | H    | -6.4734307 | -6.8456305 | -3.1549937 |
| O    | -7.880622  | -4.4717674 | -5.0131201 | H    | -8.1202327 | -6.1611498 | -3.1162162 |
| C    | -7.8192934 | -3.6525826 | -6.1197075 | H    | -7.5194884 | -6.9897743 | -4.5908688 |
| C    | -6.5946415 | -2.8219299 | -6.3655873 | H    | 2.555189   | -2.905767  | -2.9322456 |
| C    | -7.2500024 | -6.3492127 | -3.7488522 | H    | -2.882246  | -5.5055944 | 0.2234567  |
| O    | -7.2615681 | -3.8366753 | -2.2624986 | H    | -4.8894041 | -0.1967504 | -4.9705028 |
| O    | -5.7950897 | -6.0300348 | -6.2516301 | H    | -4.149122  | -2.2319077 | -8.6759785 |
| O    | -1.6851098 | 3.8225852  | -1.1786003 | H    | -1.519133  | 7.7873388  | -6.8889267 |
| O    | -2.8360083 | 1.5077723  | -5.1228474 | H    | 2.4513479  | 6.2199615  | -6.350827  |

|                                                               |            |            |            |   |            |              |            |
|---------------------------------------------------------------|------------|------------|------------|---|------------|--------------|------------|
| C                                                             | 1.3146095  | -3.138553  | -1.5344353 | H | -5.6096301 | -3.8565944   | -9.5041613 |
| C                                                             | -1.8004977 | -4.0103937 | 0.5964849  | H | -6.2264385 | -4.9561204   | -8.2516069 |
| O                                                             | 2.1739857  | -3.127157  | -0.6815135 | H | -7.2991849 | -3.747787    | -8.9563926 |
| O                                                             | 1.5877463  | -3.0104781 | -2.8515876 | H | -6.7311275 | -0.8910944   | -3.8471845 |
| O                                                             | -2.0353882 | -5.1461329 | -0.1031882 | H | -3.0931342 | 0.2206248    | -6.3751202 |
| O                                                             | -2.5547144 | -3.5941312 | 1.4446649  | H | -3.3542354 | 6.8174964    | -6.0598825 |
| O                                                             | -8.7907917 | -3.630046  | -6.8351126 | H | -3.3417313 | 5.0606534    | -5.8042678 |
| O                                                             | -0.1831361 | 3.0416819  | -3.8358484 | H | -3.1781882 | 6.1417564    | -4.429067  |
| C                                                             | -6.2429631 | -1.804953  | -5.4654697 | H | 1.8915587  | 8.111055     | -7.5691521 |
| C                                                             | -5.1354014 | -0.9849394 | -5.6775824 | H | 1.2904812  | 3.5748202    | -4.4073145 |
| <b>NImag</b>                                                  |            |            |            |   |            | 0            |            |
| <b><math>\Sigma</math> Electronic and thermal Free Energy</b> |            |            |            |   |            | -1865682.671 |            |
| <b>mol Fraction</b>                                           |            |            |            |   |            | 1.56E-14     |            |



**(8S, 13R, 8aS, 12aR, 13aR)-Diazaphilonic acid - Conformer 21**

| Atom | X          | Y          | Z          | Atom | X          | Y          | Z          |
|------|------------|------------|------------|------|------------|------------|------------|
| C    | -3.10899   | -4.3613845 | -5.3100842 | C    | -10.642146 | -3.3735106 | -8.2529868 |
| C    | -3.0074191 | -3.7521429 | -4.0947402 | C    | -9.4805648 | -2.7184469 | -8.669943  |
| C    | -4.14915   | -3.618384  | -3.2001997 | C    | -8.3028568 | -2.818792  | -7.933093  |
| C    | -5.4853268 | -4.1615581 | -3.5658459 | C    | 0.2664829  | 6.3066295  | -5.4708286 |
| C    | -5.5321715 | -5.0877954 | -4.7958092 | C    | 0.9632907  | 7.3708598  | -6.023714  |
| C    | -4.3618749 | -4.9075182 | -5.8071396 | C    | 2.2663873  | 7.6832178  | -5.6039218 |
| C    | -1.7859983 | -3.157109  | -3.5851785 | C    | 2.9026552  | 6.916051   | -4.6383508 |
| C    | -1.7358098 | -2.551227  | -2.3822972 | C    | 2.232615   | 5.826829   | -4.0728486 |
| O    | -2.8524167 | -2.4365211 | -1.5835426 | C    | -7.0770916 | -2.0916191 | -8.4381026 |
| C    | -4.0143057 | -2.9754722 | -2.0214347 | O    | -9.440001  | -5.00156   | -5.2041975 |
| C    | -0.5017628 | -1.9463733 | -1.7467286 | O    | -11.757399 | -3.2206948 | -9.0219113 |
| C    | -0.8009722 | -0.6058492 | -1.0945355 | C    | -1.1184249 | 6.0283193  | -6.0120209 |
| C    | -0.8826773 | -0.5241117 | 0.2537627  | O    | 2.8628941  | 8.7514054  | -6.1979625 |
| C    | -0.6532485 | -1.6169784 | 1.2516269  | O    | 2.9182834  | 5.1176891  | -3.1624202 |
| C    | -0.442638  | -3.008653  | 0.6260426  | H    | -2.2608374 | -4.4087733 | -5.9866866 |
| C    | 0.2139158  | -2.9278966 | -0.764142  | H    | -0.882293  | -3.2040613 | -4.1847945 |
| C    | -1.0121569 | 0.5834758  | -1.9220678 | H    | -4.8304209 | -2.8278119 | -1.3254372 |
| C    | -1.2828422 | 1.8022752  | -1.1711845 | H    | 0.1998436  | -1.7769893 | -2.5679183 |
| C    | -1.3338662 | 1.7748021  | 0.1775624  | H    | -1.4853328 | -1.6307952 | 1.9611918  |
| O    | -1.1503501 | 0.6561961  | 0.9071115  | H    | 0.2416744  | -1.3485982 | 1.8262275  |
| C    | -0.9354127 | 0.5953913  | -3.2864194 | H    | 0.2642918  | -3.5408495 | 1.275954   |
| C    | -1.0770404 | 1.8080865  | -4.0747339 | H    | 0.1861968  | -3.9251817 | -1.2179099 |
| C    | -1.6514853 | 3.070457   | -3.3799413 | H    | -1.5255302 | 2.6484351  | 0.7878158  |
| C    | -1.4949095 | 3.1087708  | -1.8495341 | H    | -0.7097091 | -0.2964052 | -3.858421  |
| O    | -1.067451  | 4.2456238  | -3.9640329 | H    | -3.6851299 | 2.2923635  | -3.2970199 |
| C    | 0.2579809  | 4.3906807  | -3.7698609 | H    | -3.5647268 | 4.0707308  | -3.2730762 |
| C    | 0.890441   | 5.5151597  | -4.4558207 | H    | -3.2798094 | 3.1649658  | -4.7920654 |
| C    | -3.1512762 | 3.1560093  | -3.7066324 | H    | -4.577386  | -6.7549325 | -3.7578864 |
| O    | -6.7857102 | -4.9467693 | -5.472156  | H    | -6.35728   | -6.7078769 | -3.6280617 |
| C    | -7.0157791 | -3.7111997 | -5.9767632 | H    | -5.5792984 | -7.21051   | -5.1579859 |
| C    | -8.2748231 | -3.6128423 | -6.7571844 | H    | 3.2326829  | -2.1952138 | -1.6216131 |
| C    | -5.5072709 | -6.5424931 | -4.2956037 | H    | -3.2469421 | -4.3396242 | 1.5052082  |
| O    | -6.4742146 | -3.9652115 | -2.8823039 | H    | -11.540266 | -4.6525763 | -6.7595317 |
| O    | -4.5048278 | -5.3079006 | -6.9546295 | H    | -9.5139281 | -2.1320309 | -9.5818705 |
| O    | -1.6316228 | 4.1495926  | -1.2318247 | H    | 0.514174   | 7.9796821  | -6.8009275 |
| O    | -0.8357813 | 1.8549535  | -5.2739067 | H    | 3.9175407  | 7.1242968  | -4.3113865 |

|                                                               |            |            |            |   |            |              |            |
|---------------------------------------------------------------|------------|------------|------------|---|------------|--------------|------------|
| C                                                             | 1.6903906  | -2.5663219 | -0.6096575 | H | -7.262118  | -1.6928296   | -9.439716  |
| C                                                             | -1.6584081 | -3.9296329 | 0.5976658  | H | -6.8075035 | -1.2653111   | -7.7742077 |
| O                                                             | 2.2807384  | -2.4625462 | 0.4434     | H | -6.2047745 | -2.7511912   | -8.4812932 |
| O                                                             | 2.298257   | -2.4094451 | -1.8059679 | H | -10.334811 | -5.334959    | -5.0354343 |
| O                                                             | -2.5596936 | -3.648722  | 1.5643701  | H | -12.486425 | -3.7292501   | -8.6338829 |
| O                                                             | -1.779154  | -4.8756273 | -0.1501766 | H | -1.3138753 | 6.671528     | -6.8747481 |
| O                                                             | -6.2206283 | -2.7996738 | -5.8173671 | H | -1.2260089 | 4.9844352    | -6.3201653 |
| O                                                             | 0.8568235  | 3.6029615  | -3.0208081 | H | -1.8906489 | 6.216907     | -5.2598088 |
| C                                                             | -9.4557239 | -4.2705716 | -6.3519611 | H | 3.754771   | 8.8607833    | -5.8313917 |
| C                                                             | -10.634853 | -4.146228  | -7.0930806 | H | 2.3418008  | 4.3591333    | -2.8896147 |
| <b>NImag</b>                                                  |            |            |            |   |            | 0            |            |
| <b><math>\Sigma</math> Electronic and thermal Free Energy</b> |            |            |            |   |            | -1865689.647 |            |
| <b>mol Fraction</b>                                           |            |            |            |   |            | 2.05E-09     |            |

**(8S, 13R, 8aS, 12aR, 13aR)-Diazaphilonic acid - Conformer 22**

| Atom | X          | Y          | Z          | Atom | X          | Y          | Z          |
|------|------------|------------|------------|------|------------|------------|------------|
| C    | -10.476301 | -3.1462007 | -8.3122657 | C    | -2.9975887 | -4.2473392 | -5.2899997 |
| C    | -9.3222636 | -2.4308819 | -8.6425171 | C    | -2.9386068 | -3.6855452 | -4.0495903 |
| C    | -8.1569664 | -2.57312   | -7.8935346 | C    | -4.1017655 | -3.6205364 | -3.1737911 |
| C    | 2.0790992  | 6.1418501  | -4.1451274 | C    | -5.4139477 | -4.1875154 | -3.5902341 |
| C    | 2.6661134  | 7.0316289  | -5.0343313 | C    | -5.41811   | -5.0462392 | -4.8704133 |
| C    | 2.2983758  | 7.0280426  | -6.3882385 | C    | -4.2254513 | -4.8009956 | -5.8402205 |
| C    | 1.3527714  | 6.1291286  | -6.8660201 | C    | -1.7424864 | -3.0818615 | -3.4906593 |
| C    | 0.7399824  | 5.2260619  | -5.9883695 | C    | -1.7365064 | -2.5154079 | -2.2674503 |
| C    | -6.9416776 | -1.7733352 | -8.3054714 | O    | -2.8713605 | -2.4638059 | -1.4905363 |
| O    | -9.2985764 | -5.0224932 | -5.4009687 | C    | -4.0102793 | -3.0201825 | -1.9676339 |
| O    | -11.57908  | -2.9469062 | -9.0874259 | C    | -0.5378933 | -1.9035629 | -1.5761064 |
| C    | 2.4999653  | 6.1724174  | -2.6931557 | C    | -0.8612294 | -0.5526721 | -0.9548972 |
| O    | 2.9203748  | 7.9299332  | -7.199462  | C    | -0.9916875 | -0.4484635 | 0.3904146  |
| O    | -0.11982   | 4.360493   | -6.5616731 | C    | -0.8177903 | -1.5269021 | 1.4140268  |
| H    | -2.1335887 | -4.2460715 | -5.9480444 | C    | -0.6023318 | -2.927     | 0.8202338  |
| H    | -0.8253116 | -3.0846537 | -4.0713769 | C    | 0.1159662  | -2.8778148 | -0.5449907 |
| H    | -4.8376626 | -2.9266947 | -1.2755297 | C    | -1.0286298 | 0.6247318  | -1.8052153 |
| H    | 0.2075069  | -1.7478496 | -2.360648  | C    | -1.3140502 | 1.8580468  | -1.0874381 |
| H    | -1.6961947 | -1.5381625 | 2.0676825  | C    | -1.4174943 | 1.8518192  | 0.2589227  |
| H    | 0.0434355  | -1.2552168 | 2.0353818  | O    | -1.2723065 | 0.7432888  | 1.0099122  |
| H    | 0.0674259  | -3.4720684 | 1.4974832  | C    | -0.8927645 | 0.6113978  | -3.1696206 |
| H    | 0.1156041  | -3.8775657 | -0.9924617 | C    | -0.9613693 | 1.8173756  | -3.9591104 |
| H    | -1.6245288 | 2.7363893  | 0.8479561  | C    | -1.5650813 | 3.0912582  | -3.328018  |
| H    | -0.6404915 | -0.2894835 | -3.7147625 | C    | -1.4927809 | 3.157927   | -1.7938326 |
| H    | -3.6159683 | 2.3409213  | -3.3313084 | O    | -0.9267654 | 4.2193923  | -3.9303279 |
| H    | -3.4614888 | 4.1177069  | -3.3415527 | C    | 0.4172329  | 4.3268263  | -3.6688163 |
| H    | -3.1240106 | 3.1763643  | -4.8237825 | C    | 1.0787151  | 5.2453943  | -4.6091252 |
| H    | -4.4736625 | -6.7638204 | -3.9089119 | C    | -3.046825  | 3.1852006  | -3.7333777 |
| H    | -6.2567302 | -6.7335809 | -3.8132613 | O    | -6.6556725 | -4.8771522 | -5.5696604 |
| H    | -5.4431615 | -7.144964  | -5.352322  | C    | -6.8874738 | -3.6136186 | -6.0000487 |
| H    | 3.1803736  | -2.1848754 | -1.270586  | C    | -8.1320885 | -3.4721112 | -6.7945017 |
| H    | -2.5873274 | -5.3888024 | 0.2254576  | C    | -5.3943481 | -6.5262071 | -4.4524934 |
| H    | -11.372671 | -4.5762163 | -6.9618587 | O    | -6.4176924 | -4.0612612 | -2.9124782 |
| H    | -9.3521459 | -1.7632988 | -9.4969019 | O    | -4.3285831 | -5.1579039 | -7.0058711 |
| H    | 3.41268    | 7.7434257  | -4.6984054 | O    | -1.6858076 | 4.2011718  | -1.1976498 |
| H    | 1.0848638  | 6.0854633  | -7.9182422 | O    | -0.6036215 | 1.8685472  | -5.1386211 |

|                                                               |            |            |            |   |            |              |            |
|---------------------------------------------------------------|------------|------------|------------|---|------------|--------------|------------|
| H                                                             | -7.1200867 | -1.2887637 | -9.2697206 | C | 1.5888533  | -2.5231563   | -0.3241059 |
| H                                                             | -6.7051114 | -1.0051863 | -7.5637685 | C | -1.8867879 | -3.7511486   | 0.8296156  |
| H                                                             | -6.0515773 | -2.4040697 | -8.3918939 | O | 2.1276652  | -2.401623    | 0.7535097  |
| H                                                             | -10.190821 | -5.3828809 | -5.2806846 | O | 2.2540193  | -2.3980299   | -1.4934139 |
| H                                                             | -12.30464  | -3.502826  | -8.7629736 | O | -1.7549276 | -4.8924535   | 0.1095682  |
| H                                                             | 3.1746652  | 7.0139417  | -2.5116377 | O | -2.8859689 | -3.490174    | 1.4587289  |
| H                                                             | 1.6404331  | 6.2696683  | -2.0211538 | O | -6.1008262 | -2.7101088   | -5.7655477 |
| H                                                             | 3.0102817  | 5.2465168  | -2.410865  | O | 0.9294555  | 3.7022017    | -2.7561947 |
| H                                                             | 2.5778761  | 7.8291424  | -8.1016438 | C | -9.3062356 | -4.189171    | -6.4763847 |
| H                                                             | -0.4010562 | 3.6463669  | -5.9485616 | C | -10.473098 | -4.0220274   | -7.2282551 |
| <b>NImag</b>                                                  |            |            |            |   |            | 0            |            |
| <b><math>\Sigma</math> Electronic and thermal Free Energy</b> |            |            |            |   |            | -1865687.124 |            |
| <b>mol Fraction</b>                                           |            |            |            |   |            | 2.88E-11     |            |

**Data S3.** Lowest energy conformer 3D structure, all overlaid 3D structures, cartesian coordinates, number of imaginary frequencies, and energy for (8*S*, 13*R*, 3*aR*, 8*aS*, 12*aR*, 13*aS*)-Pavesiflonic acid conformers.

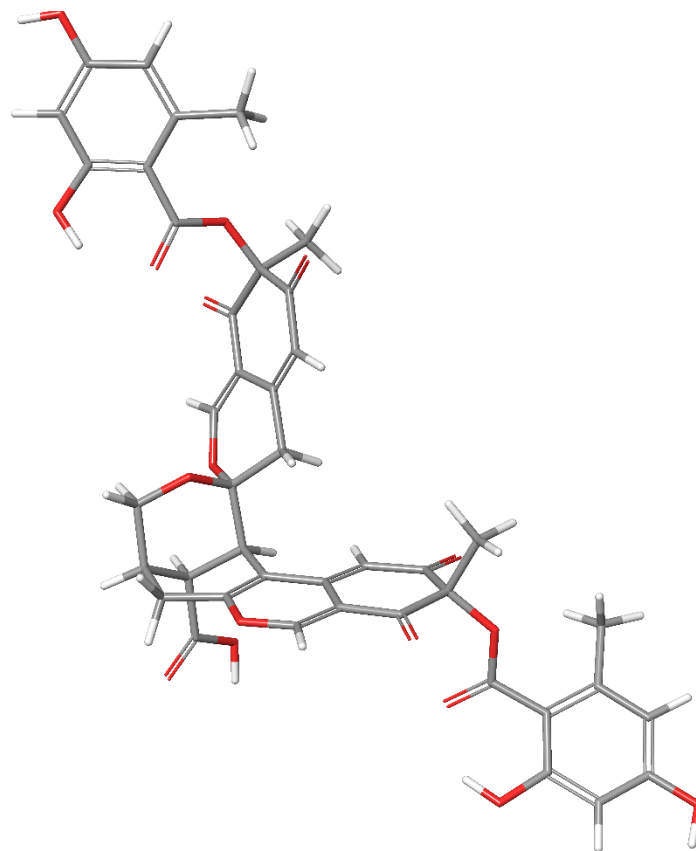

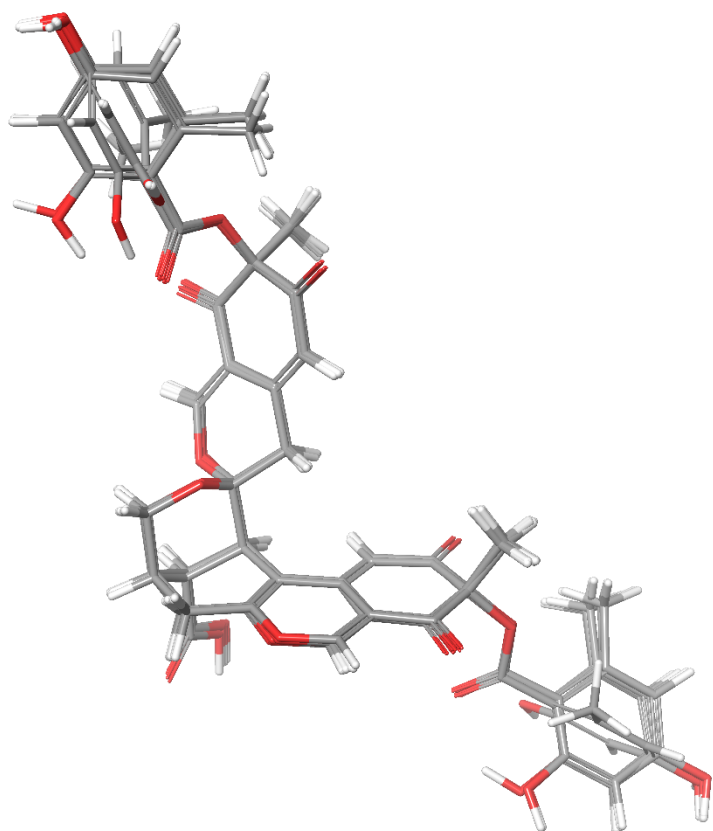

**(8S, 13R, 3aR, 8aS, 12aR, 13aS)- Pavesiflonic acid - Conformer 1**

| Atom | X          | Y          | Z          | Atom | X          | Y          | Z          |
|------|------------|------------|------------|------|------------|------------|------------|
| C    | -7.5559794 | -8.9522551 | -0.3367636 | C    | -18.276353 | -5.1756033 | 6.8350881  |
| C    | -8.566997  | -7.9202476 | -0.6908413 | C    | -2.6678509 | -9.7460143 | 1.0212856  |
| C    | -8.754332  | -6.7193865 | 0.1145277  | C    | -1.3165928 | -10.021554 | 0.8753228  |
| C    | -7.9804035 | -6.4865963 | 1.2184525  | C    | -0.5683984 | -9.458841  | -0.1715685 |
| C    | -6.9295934 | -7.3871077 | 1.6569226  | C    | -1.1600884 | -8.5902662 | -1.0776047 |
| C    | -6.8712732 | -8.8063549 | 1.0337798  | C    | -2.5176228 | -8.2809724 | -0.9491283 |
| C    | -9.2968415 | -8.1146372 | -1.810825  | C    | -17.361649 | -5.3798945 | 8.0223291  |
| O    | -10.222509 | -7.2442953 | -2.2572842 | C    | -3.3799681 | -10.375802 | 2.1979101  |
| C    | -10.447897 | -6.0959391 | -1.5371299 | O    | 0.7468577  | -9.7973089 | -0.2358392 |
| C    | -9.7862679 | -5.8106102 | -0.3872602 | O    | -3.0152371 | -7.4185577 | -1.849098  |
| C    | -11.435677 | -5.215408  | -2.2401143 | O    | -21.871771 | -4.7948995 | 6.4146293  |
| C    | -11.718812 | -3.8887948 | -1.5031086 | O    | -18.456439 | -4.8932446 | 3.1387782  |
| C    | -10.476971 | -3.419185  | -0.7258754 | H    | -8.0632768 | -5.573402  | 1.7964295  |
| C    | -10.137843 | -4.5114241 | 0.3202637  | H    | -9.1918851 | -8.983031  | -2.4490941 |
| C    | -11.366825 | -4.6805551 | 1.2614853  | H    | -12.365716 | -5.7766202 | -2.3992722 |
| O    | -12.543373 | -4.9409714 | 0.555789   | H    | -11.02489  | -5.0035073 | -3.2340953 |
| C    | -9.3022596 | -3.0927643 | -1.6348026 | H    | -11.998405 | -3.1337316 | -2.2452179 |
| C    | -12.864848 | -4.0185947 | -0.4970031 | H    | -10.710487 | -2.4934109 | -0.1854826 |
| O    | -8.1806825 | -2.8378129 | -0.9253367 | H    | -9.2960515 | -4.1749835 | 0.9269226  |
| O    | -9.3467668 | -3.0297711 | -2.8439556 | H    | -13.764238 | -4.4300167 | -0.9616194 |
| O    | -11.473169 | -3.3785675 | 1.9308537  | H    | -13.114057 | -3.0393208 | -0.0691685 |
| C    | -12.274287 | -3.3033597 | 3.0068006  | H    | -7.4780993 | -2.6314852 | -1.5710815 |
| C    | -12.762507 | -4.3660731 | 3.6939942  | H    | -12.511129 | -2.2818198 | 3.2869523  |
| C    | -12.360782 | -5.7118964 | 3.3267434  | H    | -10.285397 | -5.6759075 | 2.8260815  |
| C    | -11.246511 | -5.7885404 | 2.3091154  | H    | -11.238379 | -6.7567989 | 1.8047429  |
| C    | -13.722188 | -4.1192971 | 4.7908647  | H    | -12.623978 | -7.8122871 | 3.5908864  |
| C    | -14.134174 | -5.3474822 | 5.6323439  | H    | -12.240337 | -5.4347742 | 6.7072819  |
| C    | -13.927013 | -6.7225841 | 4.9455697  | H    | -13.475376 | -4.3904527 | 7.4538287  |
| C    | -12.904311 | -6.809552  | 3.9009639  | H    | -13.616924 | -6.1717811 | 7.5610563  |
| O    | -15.49991  | -5.2170926 | 6.0571289  | H    | -7.4586999 | -10.804175 | 1.6133774  |
| C    | -13.307744 | -5.334933  | 6.9291308  | H    | -7.0450126 | -9.7214695 | 2.9792892  |
| O    | -5.5029309 | -9.2354436 | 0.9473754  | H    | -8.6010076 | -9.5407661 | 2.136023   |
| C    | -7.5419303 | -9.787912  | 2.007977   | H    | -20.842838 | -4.7117898 | 3.9132959  |
| O    | -6.1415236 | -7.1060535 | 2.5515817  | H    | -20.006376 | -5.1236702 | 8.113029   |

|                                                               |            |            |            |   |            |              |            |
|---------------------------------------------------------------|------------|------------|------------|---|------------|--------------|------------|
| O                                                             | -7.3344878 | -9.9179055 | -1.045353  | H | -0.8083782 | -10.675278   | 1.5758607  |
| O                                                             | -14.540323 | -7.6964449 | 5.3524259  | H | -0.5994594 | -8.1273294   | -1.8848119 |
| O                                                             | -14.125288 | -3.0075959 | 5.0888953  | H | -17.956627 | -5.4712144   | 8.9354364  |
| C                                                             | -16.415472 | -5.1850675 | 5.0683087  | H | -16.753532 | -6.2821385   | 7.9102483  |
| C                                                             | -17.815372 | -5.1059431 | 5.4821773  | H | -16.666243 | -4.5441419   | 8.1446716  |
| O                                                             | -16.037747 | -5.2091559 | 3.8869241  | H | -3.905731  | -9.6263144   | 2.7963627  |
| C                                                             | -4.7258353 | -8.5224092 | 0.1080611  | H | -4.1298786 | -11.103546   | 1.8728647  |
| C                                                             | -3.3075961 | -8.8713125 | 0.087098   | H | -2.6554521 | -10.889607   | 2.8360482  |
| O                                                             | -5.240749  | -7.6451838 | -0.6032732 | H | 1.1545853  | -9.3452888   | -0.9916735 |
| C                                                             | -18.782324 | -4.9478208 | 4.4391049  | H | -3.9644057 | -7.2631359   | -1.6103511 |
| C                                                             | -20.144399 | -4.835623  | 4.7361604  | H | -22.410918 | -4.682368    | 5.6155924  |
| C                                                             | -20.563312 | -4.8939664 | 6.057232   | H | -17.473173 | -5.011855    | 3.0802572  |
| C                                                             | -19.634448 | -5.0689381 | 7.0956676  |   |            |              |            |
| <b>NImag</b>                                                  |            |            |            |   |            | 0            |            |
| <b><math>\Sigma</math> Electronic and thermal Free Energy</b> |            |            |            |   |            | -1819235.386 |            |
| <b>mol Fraction</b>                                           |            |            |            |   |            | 0.500795215  |            |



**(8S, 13R, 3aR, 8aS, 12aR, 13aS)- Pavesiflonic acid - Conformer 2**

| Atom | X          | Y          | Z          | Atom | X          | Y          | Z          |
|------|------------|------------|------------|------|------------|------------|------------|
| C    | -7.6063742 | -9.0007768 | -0.1942116 | C    | -18.181059 | -4.6938255 | 6.895505   |
| C    | -8.6196105 | -7.9898181 | -0.5990285 | C    | -2.6975596 | -9.7260929 | 1.1270703  |
| C    | -8.787687  | -6.7365227 | 0.126763   | C    | -1.3502525 | -10.017738 | 0.9759806  |
| C    | -7.9929906 | -6.4338679 | 1.1985241  | C    | -0.6190029 | -9.530813  | -0.1197427 |
| C    | -6.9379213 | -7.308149  | 1.6779377  | C    | -1.2236618 | -8.7223883 | -1.0717213 |
| C    | -6.8964071 | -8.7664144 | 1.1509718  | C    | -2.5774335 | -8.3982153 | -0.940245  |
| C    | -9.3703245 | -8.2554565 | -1.6902143 | C    | -17.245924 | -4.821697  | 8.0775026  |
| O    | -10.30051  | -7.4124397 | -2.1778126 | C    | -3.3906569 | -10.271383 | 2.3560768  |
| C    | -10.508391 | -6.2170732 | -1.532808  | O    | 0.6935488  | -9.8795422 | -0.1844254 |
| C    | -9.8250009 | -5.8583605 | -0.4167129 | O    | -3.0879635 | -7.5960276 | -1.8874442 |
| C    | -11.505236 | -5.3808291 | -2.2759165 | O    | -21.78195  | -4.3241943 | 6.5138657  |
| C    | -11.769817 | -4.0061618 | -1.6251281 | O    | -18.426533 | -4.661709  | 3.1923118  |
| C    | -10.512333 | -3.4916641 | -0.9034496 | H    | -8.0618382 | -5.4834189 | 1.7150113  |
| C    | -10.158672 | -4.5127143 | 0.2077556  | H    | -9.2802896 | -9.1653733 | -2.2702615 |
| C    | -11.371149 | -4.6117773 | 1.179874   | H    | -12.440189 | -5.9467126 | -2.3803389 |
| O    | -12.561239 | -4.9131029 | 0.5142799  | H    | -11.111631 | -5.2384527 | -3.2890547 |
| C    | -9.3529232 | -3.233197  | -1.8529776 | H    | -12.059782 | -3.3013573 | -2.4113795 |
| C    | -12.898023 | -4.06204   | -0.592405  | H    | -10.732441 | -2.5304328 | -0.4226159 |
| O    | -8.2177531 | -2.9368442 | -1.1822802 | H    | -9.3047544 | -4.1405118 | 0.7753243  |
| O    | -9.4189596 | -3.2514801 | -3.0626484 | H    | -13.807262 | -4.4991791 | -1.0122097 |
| O    | -11.460312 | -3.2671631 | 1.7616956  | H    | -13.135613 | -3.0549152 | -0.2271933 |
| C    | -12.241633 | -3.11554   | 2.8441408  | H    | -7.5261052 | -2.7780576 | -1.8527992 |
| C    | -12.721552 | -4.1270442 | 3.6099591  | H    | -12.469379 | -2.0762491 | 3.058909   |
| C    | -12.331795 | -5.4965856 | 3.3272335  | H    | -10.265637 | -5.5050983 | 2.7886143  |
| C    | -11.236348 | -5.6473136 | 2.2975196  | H    | -11.241143 | -6.6473626 | 1.8595004  |
| C    | -13.660305 | -3.8020266 | 4.7045586  | H    | -12.598457 | -7.5730407 | 3.7370484  |
| C    | -14.061939 | -4.9686216 | 5.6340719  | H    | -12.14942  | -4.9931436 | 6.6787773  |
| C    | -13.87259  | -6.3878865 | 5.0380016  | H    | -13.366676 | -3.8945367 | 7.3749425  |
| C    | -12.869209 | -6.5502653 | 3.9837028  | H    | -13.513343 | -5.6638611 | 7.6044952  |
| O    | -15.419281 | -4.8028497 | 6.0731749  | H    | -7.4809983 | -10.717638 | 1.8743165  |
| C    | -13.212255 | -4.8730586 | 6.9122393  | H    | -7.0384319 | -9.5475112 | 3.1565331  |
| O    | -5.5315261 | -9.2073237 | 1.0693262  | H    | -8.6087369 | -9.4160897 | 2.3308473  |
| C    | -7.5531212 | -9.6766996 | 2.2009216  | H    | -20.797883 | -4.4160779 | 3.9948182  |
| O    | -6.1327519 | -6.9715371 | 2.5375057  | H    | -19.887572 | -4.5464848 | 8.1973868  |
| O    | -7.4015033 | -10.013084 | -0.8398895 | H    | -0.8319427 | -10.625243 | 1.7099327  |
| O    | -14.482294 | -7.3289699 | 5.5203996  | H    | -0.6759826 | -8.317868  | -1.918251  |

|                                                               |            |            |            |   |            |              |            |
|---------------------------------------------------------------|------------|------------|------------|---|------------|--------------|------------|
| O                                                             | -14.053659 | -2.6707373 | 4.9340025  | H | -17.8247   | -4.8474844   | 9.005112   |
| C                                                             | -16.352358 | -4.8326742 | 5.1007847  | H | -16.643667 | -5.7327336   | 8.016409   |
| C                                                             | -17.744244 | -4.7184439 | 5.5330427  | H | -16.544965 | -3.9833079   | 8.1302712  |
| O                                                             | -15.996055 | -4.9383708 | 3.917226   | H | -3.9027283 | -9.4806062   | 2.9117254  |
| C                                                             | -4.7670164 | -8.5565013 | 0.1700553  | H | -4.1490144 | -11.015726   | 2.0943652  |
| C                                                             | -3.3507489 | -8.9132184 | 0.1474488  | H | -2.6566514 | -10.744484   | 3.0145272  |
| O                                                             | -5.2913125 | -7.7266175 | -0.5895941 | H | 1.0892527  | -9.4816682   | -0.9762384 |
| C                                                             | -18.729186 | -4.626424  | 4.4989065  | H | -4.0320174 | -7.419956    | -1.6428184 |
| C                                                             | -20.085248 | -4.4874211 | 4.8117172  | H | -22.334959 | -4.2633478   | 5.7187018  |
| C                                                             | -20.480541 | -4.4539469 | 6.1409099  | H | -17.444917 | -4.7888048   | 3.1245587  |
| C                                                             | -19.533816 | -4.562815  | 7.1722318  |   |            |              |            |
| <b>NImag</b>                                                  |            |            |            |   |            | 0            |            |
| <b><math>\Sigma</math> Electronic and thermal Free Energy</b> |            |            |            |   |            | -1819235.384 |            |
| <b>mol Fraction</b>                                           |            |            |            |   |            | 0.499204781  |            |

**(8S, 13R, 3aR, 8aS, 12aR, 13aS)- Pavesiflonic acid - Conformer 3**

| Atom | X          | Y          | Z          | Atom | X          | Y          | Z          |
|------|------------|------------|------------|------|------------|------------|------------|
| C    | -7.5845824 | -8.9076987 | -0.4248791 | C    | -18.293879 | -5.2411684 | 6.8491454  |
| C    | -8.5849715 | -7.8551147 | -0.7511358 | C    | -2.6444673 | -9.2385484 | 1.2000038  |
| C    | -8.7687035 | -6.6824083 | 0.0938258  | C    | -1.2852774 | -9.541264  | 1.1313881  |
| C    | -7.9989982 | -6.495459  | 1.2088457  | C    | -0.5986556 | -9.4943836 | -0.0838423 |
| C    | -6.9488493 | -7.412498  | 1.6132215  | C    | -1.2639798 | -9.1283335 | -1.2530203 |
| C    | -6.8914315 | -8.8117096 | 0.9471294  | C    | -2.6213112 | -8.802145  | -1.1991062 |
| C    | -9.3093205 | -8.0048277 | -1.8808839 | C    | -17.379516 | -5.4886198 | 8.0284093  |
| O    | -10.226341 | -7.1115175 | -2.3029315 | C    | -3.3131518 | -9.313919  | 2.5556111  |
| C    | -10.44621  | -5.9875398 | -1.5449539 | O    | 0.7260646  | -9.8142719 | -0.0672112 |
| C    | -9.789962  | -5.7481753 | -0.3816792 | O    | -3.293467  | -8.4576234 | -2.3297802 |
| C    | -11.421015 | -5.0730877 | -2.2230214 | O    | -21.885608 | -4.8072269 | 6.4471922  |
| C    | -11.692038 | -3.7673986 | -1.4447161 | O    | -18.477012 | -4.8499214 | 3.1630662  |
| C    | -10.449059 | -3.339623  | -0.6454946 | H    | -8.0770048 | -5.6024772 | 1.8183337  |
| C    | -10.131487 | -4.4694759 | 0.3665497  | H    | -9.2067551 | -8.8511326 | -2.5483275 |
| C    | -11.367972 | -4.6544259 | 1.2939142  | H    | -12.356989 | -5.6176358 | -2.4040281 |
| O    | -12.544187 | -4.8745521 | 0.5743002  | H    | -11.003479 | -4.8338646 | -3.2079179 |
| C    | -9.2638098 | -3.0024444 | -1.536966  | H    | -11.957322 | -2.9849723 | -2.1634109 |
| C    | -12.845928 | -3.9144123 | -0.4501284 | H    | -10.673313 | -2.4278111 | -0.0779334 |
| O    | -8.1402375 | -2.8002654 | -0.8144316 | H    | -9.2897304 | -4.1641565 | 0.9894447  |
| O    | -9.302581  | -2.8907004 | -2.7429011 | H    | -13.747776 | -4.2982317 | -0.9333109 |
| O    | -11.461869 | -3.3738364 | 2.0071183  | H    | -13.084758 | -2.946143  | 0.0077932  |
| C    | -12.265265 | -3.3252636 | 3.0820832  | H    | -7.4280924 | -2.5927035 | -1.449141  |
| C    | -12.769281 | -4.4043152 | 3.7317956  | H    | -12.490255 | -2.3109874 | 3.3964889  |
| C    | -12.383759 | -5.7420368 | 3.3202344  | H    | -10.3065   | -5.7177629 | 2.8270376  |
| C    | -11.267351 | -5.7988328 | 2.3037229  | H    | -11.270417 | -6.7492017 | 1.7663891  |
| C    | -13.728496 | -4.1823217 | 4.8339461  | H    | -12.674813 | -7.8465659 | 3.5122268  |
| C    | -14.156215 | -5.4328978 | 5.6335608  | H    | -12.263118 | -5.5809526 | 6.7030794  |
| C    | -13.966885 | -6.7865649 | 4.9005252  | H    | -13.484239 | -4.5469585 | 7.4860708  |
| C    | -12.943154 | -6.8514509 | 3.8556371  | H    | -13.648546 | -6.3289541 | 7.5325989  |
| O    | -15.51987  | -5.2990465 | 6.0642463  | H    | -7.4803498 | -10.825031 | 1.4614563  |
| C    | -13.329001 | -5.4750518 | 6.9292596  | H    | -7.0582791 | -9.7922829 | 2.8617247  |
| O    | -5.5295513 | -9.2430489 | 0.8303239  | H    | -8.6193219 | -9.5798454 | 2.0346893  |
| C    | -7.5611056 | -9.8231986 | 1.8916409  | H    | -20.85982  | -4.6638273 | 3.9473481  |
| O    | -6.1635413 | -7.1507    | 2.5185331  | H    | -20.020878 | -5.2052101 | 8.1318274  |
| O    | -7.3804834 | -9.8569824 | -1.1602968 | H    | -0.7361425 | -9.8156842 | 2.0257788  |
| O    | -14.594273 | -7.7651091 | 5.2734668  | H    | -0.7347809 | -9.0931696 | -2.2047782 |

|                                                               |            |            |            |   |            |              |            |
|---------------------------------------------------------------|------------|------------|------------|---|------------|--------------|------------|
| O                                                             | -14.119792 | -3.0765096 | 5.1679214  | H | -17.973719 | -5.5955016   | 8.940354   |
| C                                                             | -16.436146 | -5.2229203 | 5.0787831  | H | -16.783934 | -6.3957951   | 7.8915458  |
| C                                                             | -17.834488 | -5.1385507 | 5.4978824  | H | -16.672498 | -4.665849    | 8.1704444  |
| O                                                             | -16.061098 | -5.2140977 | 3.8964553  | H | -4.0078698 | -8.488495    | 2.7282586  |
| C                                                             | -4.765563  | -8.4651863 | 0.0126005  | H | -3.8944746 | -10.238193   | 2.6481884  |
| C                                                             | -3.3344817 | -8.857521  | 0.0197265  | H | -2.5550527 | -9.3113873   | 3.3445572  |
| O                                                             | -5.2576987 | -7.5620785 | -0.6377153 | H | 1.0862795  | -9.7369312   | -0.9644143 |
| C                                                             | -18.801241 | -4.9387139 | 4.4618754  | H | -2.6873002 | -8.5211175   | -3.0840693 |
| C                                                             | -20.161481 | -4.8195489 | 4.7648761  | H | -22.424452 | -4.6657672   | 5.6525748  |
| C                                                             | -20.578792 | -4.9110936 | 6.0845268  | H | -17.495016 | -4.97704     | 3.0992874  |
| C                                                             | -19.650246 | -5.1262    | 7.1155828  |   |            |              |            |
| <b>NImag</b>                                                  |            |            |            |   |            | 0            |            |
| <b><math>\Sigma</math> Electronic and thermal Free Energy</b> |            |            |            |   |            | -1819223.957 |            |
| <b>mol Fraction</b>                                           |            |            |            |   |            | 2.06E-09     |            |

**(8S, 13R, 3aR, 8aS, 12aR, 13aS)- Pavesiflonic acid - Conformer 4**

| Atom | X          | Y          | Z          | Atom | X          | Y          | Z          |
|------|------------|------------|------------|------|------------|------------|------------|
| C    | -7.6058059 | -8.9332143 | -0.4879834 | C    | -18.233047 | -5.2093071 | 6.8978591  |
| C    | -8.6221506 | -7.8967426 | -0.8056681 | C    | -3.1326888 | -10.474986 | -0.29806   |
| C    | -8.7978684 | -6.7148054 | 0.0307148  | C    | -1.8137299 | -10.895033 | -0.4639166 |
| C    | -8.016625  | -6.5156989 | 1.1335881  | C    | -0.7681419 | -9.9706185 | -0.5200751 |
| C    | -6.9733228 | -7.4391511 | 1.5520105  | C    | -1.0317508 | -8.6047858 | -0.4261826 |
| C    | -6.9209418 | -8.8401329 | 0.8865495  | C    | -2.3504805 | -8.1667325 | -0.2805489 |
| C    | -9.3603119 | -8.0600478 | -1.9249859 | C    | -17.301836 | -5.4546566 | 8.0643562  |
| O    | -10.287182 | -7.1761553 | -2.3430535 | C    | -4.2105346 | -11.536495 | -0.2487104 |
| C    | -10.498971 | -6.0421519 | -1.5946021 | O    | 0.4940288  | -10.462038 | -0.6731307 |
| C    | -9.8273549 | -5.787774  | -0.4441871 | O    | -2.6325849 | -6.8410071 | -0.1737816 |
| C    | -11.484265 | -5.1381565 | -2.2711396 | O    | -21.829531 | -4.7701979 | 6.547078   |
| C    | -11.745825 | -3.8226754 | -1.5062087 | O    | -18.470147 | -4.8362797 | 3.2129704  |
| C    | -10.492991 | -3.3837785 | -0.728834  | H    | -8.0910284 | -5.6183925 | 1.7372196  |
| C    | -10.160683 | -4.5005329 | 0.2928948  | H    | -9.2620435 | -8.9113927 | -2.5867406 |
| C    | -11.384606 | -4.6754117 | 1.2387724  | H    | -12.422194 | -5.685754  | -2.4318461 |
| O    | -12.570442 | -4.904327  | 0.5379415  | H    | -11.08095  | -4.9115185 | -3.2649199 |
| C    | -9.32006   | -3.0570061 | -1.64019   | H    | -12.021212 | -3.0497018 | -2.2313016 |
| C    | -12.886373 | -3.9575311 | -0.4946078 | H    | -10.710779 | -2.4650659 | -0.1699267 |
| O    | -8.1869115 | -2.8451725 | -0.9354644 | H    | -9.3110548 | -4.1867826 | 0.9007322  |
| O    | -9.3749437 | -2.9603644 | -2.8467969 | H    | -13.794226 | -4.3480572 | -0.9608829 |
| O    | -11.469655 | -3.3867052 | 1.9385143  | H    | -13.119877 | -2.9835762 | -0.046039  |
| C    | -12.258249 | -3.3263034 | 3.0237916  | H    | -7.4835899 | -2.6463228 | -1.5826498 |
| C    | -12.75307  | -4.3981352 | 3.6922933  | H    | -12.479154 | -2.3086291 | 3.3300167  |
| C    | -12.373015 | -5.7403119 | 3.2902585  | H    | -10.3025   | -5.7208094 | 2.7699406  |
| C    | -11.269963 | -5.8082028 | 2.2600715  | H    | -11.279392 | -6.7645018 | 1.733444   |
| C    | -13.697119 | -4.1639636 | 4.8049351  | H    | -12.66172  | -7.8425781 | 3.5088205  |
| C    | -14.113594 | -5.4057699 | 5.6238327  | H    | -12.20507  | -5.542931  | 6.6670444  |
| C    | -13.935073 | -6.7672156 | 4.9026385  | H    | -13.414455 | -4.5001871 | 7.4566668  |
| C    | -12.925421 | -6.8437581 | 3.8449697  | H    | -13.578243 | -6.2815083 | 7.5248864  |
| O    | -15.470799 | -5.2672546 | 6.0728137  | H    | -8.6559899 | -9.5728858 | 1.9884689  |
| C    | -13.2675   | -5.4342853 | 6.907694   | H    | -7.5506241 | -10.845035 | 1.4088043  |
| O    | -5.5634315 | -9.2860352 | 0.7790471  | H    | -7.0898751 | -9.8144673 | 2.7984064  |
| C    | -7.6049612 | -9.8394637 | 1.8345612  | H    | -20.840656 | -4.641165  | 4.0316238  |
| O    | -6.203827  | -7.1914322 | 2.4703952  | H    | -19.940904 | -5.1650055 | 8.2057014  |
| O    | -7.3743086 | -9.8647843 | -1.2414961 | H    | -1.5779849 | -11.949908 | -0.556165  |
| O    | -14.558099 | -7.7412497 | 5.2942975  | H    | -0.2202218 | -7.8790097 | -0.4678029 |

|                                                               |            |            |            |   |            |              |            |
|---------------------------------------------------------------|------------|------------|------------|---|------------|--------------|------------|
| O                                                             | -14.083684 | -3.0545193 | 5.132318   | H | -17.883    | -5.5610455   | 8.98473    |
| C                                                             | -16.401519 | -5.2008119 | 5.1003528  | H | -16.70752  | -6.3614729   | 7.9199335  |
| C                                                             | -17.793501 | -5.1132252 | 5.5395604  | H | -16.593577 | -4.6311543   | 8.19565    |
| O                                                             | -16.044185 | -5.2024069 | 3.91255    | H | -3.8237246 | -12.480004   | -0.6451452 |
| C                                                             | -4.7984564 | -8.5577577 | -0.0819205 | H | -4.5371146 | -11.71004    | 0.7824937  |
| C                                                             | -3.4171882 | -9.0889635 | -0.2056859 | H | -5.100376  | -11.254614   | -0.8171512 |
| O                                                             | -5.2483541 | -7.5903959 | -0.6656832 | H | 1.1238364  | -9.7250919   | -0.7037252 |
| C                                                             | -18.775171 | -4.917354  | 4.5169642  | H | -1.8003716 | -6.3432925   | -0.175723  |
| C                                                             | -20.130533 | -4.7939437 | 4.8395008  | H | -22.37976  | -4.6313056   | 5.7598448  |
| C                                                             | -20.528404 | -4.8783156 | 6.1656238  | H | -17.489656 | -4.9669395   | 3.1350114  |
| C                                                             | -19.585138 | -5.0907316 | 7.1837964  |   |            |              |            |
| <b>NImag</b>                                                  |            |            |            |   |            | 0            |            |
| <b><math>\Sigma</math> Electronic and thermal Free Energy</b> |            |            |            |   |            | -1819223.533 |            |
| <b>mol Fraction</b>                                           |            |            |            |   |            | 1.00E-09     |            |

**(8S, 13R, 3aR, 8aS, 12aR, 13aS)- Pavesiflonic acid - Conformer 5**

| Atom | X          | Y          | Z          | Atom | X          | Y          | Z          |
|------|------------|------------|------------|------|------------|------------|------------|
| C    | -7.566636  | -8.9584674 | -0.2905989 | C    | -18.108828 | -3.7741601 | 6.4576093  |
| C    | -8.5669564 | -7.9264406 | -0.6731474 | C    | -2.6909994 | -9.7584464 | 1.11955    |
| C    | -8.7465369 | -6.7048615 | 0.1023267  | C    | -1.3416961 | -10.051608 | 0.9897018  |
| C    | -7.9735119 | -6.451537  | 1.202476   | C    | -0.5831971 | -9.5309421 | -0.0713188 |
| C    | -6.931387  | -7.3496136 | 1.6651722  | C    | -1.1619631 | -8.6866306 | -1.0081601 |
| C    | -6.8855475 | -8.7847899 | 1.0784191  | C    | -2.5169498 | -8.3600202 | -0.8965773 |
| C    | -9.2946325 | -8.1413922 | -1.7908268 | C    | -17.051038 | -2.9467903 | 7.1557394  |
| O    | -10.210828 | -7.2741906 | -2.2616096 | C    | -3.4149624 | -10.341182 | 2.3131026  |
| C    | -10.429349 | -6.1070414 | -1.5695245 | O    | 0.7291387  | -9.8840089 | -0.1180795 |
| C    | -9.7693976 | -5.7999557 | -0.4243079 | O    | -3.0018819 | -7.522054  | -1.826169  |
| C    | -11.407242 | -5.2355265 | -2.2970786 | O    | -21.741054 | -4.0475492 | 6.6368078  |
| C    | -11.683641 | -3.8903322 | -1.5919311 | O    | -18.540795 | -6.3538136 | 3.883605   |
| C    | -10.441104 | -3.412092  | -0.8209515 | H    | -8.0509    | -5.5240649 | 1.7579356  |
| C    | -10.113764 | -4.4822398 | 0.2516339  | H    | -9.195011  | -9.0259285 | -2.4074253 |
| C    | -11.348051 | -4.6203075 | 1.1914785  | H    | -12.340855 | -5.7932748 | -2.4471672 |
| O    | -12.522186 | -4.8910467 | 0.485452   | H    | -10.990487 | -5.0497482 | -3.2938331 |
| C    | -9.2608625 | -3.1148339 | -1.73242   | H    | -11.954885 | -3.1505295 | -2.3523238 |
| C    | -12.83426  | -3.989851  | -0.5873321 | H    | -10.669988 | -2.4727476 | -0.3024943 |
| O    | -8.1399433 | -2.8510342 | -1.024825  | H    | -9.2718369 | -4.1378472 | 0.8535713  |
| O    | -9.2997063 | -3.0794399 | -2.9430095 | H    | -13.735064 | -4.4049262 | -1.0458925 |
| O    | -11.448329 | -3.3022615 | 1.8274277  | H    | -13.078165 | -2.9997407 | -0.1820082 |
| C    | -12.257853 | -3.1945955 | 2.8957142  | H    | -7.4339661 | -2.6648584 | -1.6729331 |
| C    | -12.756157 | -4.2366024 | 3.6061653  | H    | -12.491456 | -2.1647516 | 3.1460238  |
| C    | -12.362091 | -5.5942692 | 3.2735799  | H    | -10.282042 | -5.582616  | 2.7864172  |
| C    | -11.240728 | -5.7030585 | 2.2666248  | H    | -11.235419 | -6.6836441 | 1.7865234  |
| C    | -13.72713  | -3.9595557 | 4.6847279  | H    | -12.647438 | -7.6840469 | 3.586428   |
| C    | -14.147695 | -5.1575234 | 5.5631068  | H    | -13.647754 | -5.9281477 | 7.5139856  |
| C    | -13.943558 | -6.5518613 | 4.9136336  | H    | -12.251812 | -5.2499004 | 6.6415594  |
| C    | -12.920962 | -6.6712637 | 3.8690399  | H    | -13.463997 | -4.1557947 | 7.3548107  |
| O    | -15.507662 | -5.0003027 | 5.9821728  | H    | -7.495976  | -10.761032 | 1.7061967  |
| C    | -13.317074 | -5.1185572 | 6.8578914  | H    | -7.0768445 | -9.6481509 | 3.0459446  |
| O    | -5.5213066 | -9.2300254 | 1.0089224  | H    | -8.6272711 | -9.4730108 | 2.191547   |
| C    | -7.5703363 | -9.7342171 | 2.0744199  | H    | -20.975381 | -5.8079067 | 4.7557105  |
| O    | -6.1413739 | -7.0533483 | 2.5533353  | H    | -19.698305 | -2.83683   | 7.5780541  |
| O    | -7.3513172 | -9.9432549 | -0.9744676 | H    | -0.8431905 | -10.686411 | 1.7142201  |
| O    | -14.544059 | -7.5177904 | 5.3547478  | H    | -0.5928546 | -8.255455  | -1.8269537 |

|                                                               |            |            |            |   |            |              |            |
|---------------------------------------------------------------|------------|------------|------------|---|------------|--------------|------------|
| O                                                             | -14.136183 | -2.8357557 | 4.9346379  | H | -16.277251 | -2.5924707   | 6.4702839  |
| C                                                             | -16.413871 | -4.9573215 | 4.9646176  | H | -17.513853 | -2.0833025   | 7.6429879  |
| C                                                             | -17.798801 | -4.7197404 | 5.447996   | H | -16.542794 | -3.5381858   | 7.9254409  |
| O                                                             | -16.07556  | -5.0996458 | 3.8062334  | H | -3.9394246 | -9.5672662   | 2.880809   |
| C                                                             | -4.7328662 | -8.5467305 | 0.1558917  | H | -4.1678155 | -11.074999   | 2.0091705  |
| C                                                             | -3.3176    | -8.9091523 | 0.1538052  | H | -2.6981136 | -10.836816   | 2.9738964  |
| O                                                             | -5.234653  | -7.6847468 | -0.5827168 | H | 1.1445226  | -9.4605796   | -0.8861812 |
| C                                                             | -18.851235 | -5.4366923 | 4.8379759  | H | -3.9500159 | -7.3483804   | -1.5959565 |
| C                                                             | -20.177794 | -5.2352298 | 5.2279877  | H | -22.356897 | -4.6099098   | 6.1417258  |
| C                                                             | -20.467493 | -4.2981033 | 6.2187959  | H | -19.352821 | -6.8070239   | 3.6089534  |
| C                                                             | -19.439454 | -3.5697276 | 6.821226   |   |            |              |            |
| <b>NImag</b>                                                  |            |            |            |   |            | 0            |            |
| <b><math>\Sigma</math> Electronic and thermal Free Energy</b> |            |            |            |   |            | -1819223.244 |            |
| <b>mol Fraction</b>                                           |            |            |            |   |            | 6.16E-10     |            |



**(8S, 13R, 3aR, 8aS, 12aR, 13aS)- Pavesiflonic acid - Conformer 6**

| Atom | X          | Y          | Z          | Atom | X          | Y          | Z          |
|------|------------|------------|------------|------|------------|------------|------------|
| C    | -7.5580554 | -8.9533049 | -0.3308973 | C    | -18.272474 | -5.8413241 | 6.5892147  |
| C    | -8.5672083 | -7.9236992 | -0.6997648 | C    | -2.6071848 | -9.1841859 | 1.281353   |
| C    | -8.7549477 | -6.7145381 | 0.0912985  | C    | -1.2472899 | -9.4857088 | 1.2199438  |
| C    | -7.9793295 | -6.4701096 | 1.191125   | C    | -0.5682186 | -9.498787  | -0.000285  |
| C    | -6.9190727 | -7.3591894 | 1.6295921  | C    | -1.2418804 | -9.1951679 | -1.1824915 |
| C    | -6.8580206 | -8.7883897 | 1.030981   | C    | -2.6000195 | -8.8709225 | -1.1368396 |
| C    | -9.2962621 | -8.130261  | -1.8175187 | C    | -17.357216 | -6.741149  | 7.3911008  |
| O    | -10.221621 | -7.2639055 | -2.2752521 | C    | -3.2678309 | -9.1925162 | 2.6429249  |
| C    | -10.447048 | -6.1083606 | -1.5674836 | O    | 0.7578664  | -9.8131843 | 0.0242803  |
| C    | -9.7867974 | -5.8113061 | -0.4198719 | O    | -3.2803101 | -8.5868114 | -2.2794493 |
| C    | -11.432863 | -5.2336971 | -2.2810251 | O    | -21.817073 | -4.987091  | 6.6873016  |
| C    | -11.712986 | -3.8975214 | -1.5600114 | O    | -18.308942 | -3.5242152 | 3.7411635  |
| C    | -10.470502 | -3.4232283 | -0.7865354 | H    | -8.0609499 | -5.5506913 | 1.759387   |
| C    | -10.136952 | -4.5041306 | 0.2728871  | H    | -9.1909676 | -9.005774  | -2.4457193 |
| C    | -11.368062 | -4.6593946 | 1.2133949  | H    | -12.364523 | -5.7942179 | -2.4331751 |
| O    | -12.543505 | -4.9254648 | 0.5073943  | H    | -11.021603 | -5.0348161 | -3.2775135 |
| C    | -9.2930216 | -3.1136575 | -1.6977859 | H    | -11.988912 | -3.1501031 | -2.3112668 |
| C    | -12.860802 | -4.0127906 | -0.5538548 | H    | -10.701371 | -2.4898971 | -0.2579833 |
| O    | -8.1677597 | -2.8691301 | -0.9908379 | H    | -9.2954419 | -4.1633012 | 0.8773512  |
| O    | -9.3380448 | -3.0547667 | -2.9073668 | H    | -13.761303 | -4.4254326 | -1.015298  |
| O    | -11.472444 | -3.3504771 | 1.8675155  | H    | -13.107023 | -3.0283555 | -0.1361425 |
| C    | -12.274029 | -3.2619234 | 2.9434237  | H    | -7.4612449 | -2.6827887 | -1.6382433 |
| C    | -12.765892 | -4.3153407 | 3.6409787  | H    | -12.50792  | -2.2369722 | 3.2130309  |
| C    | -12.369331 | -5.6652434 | 3.2865605  | H    | -10.292377 | -5.6422668 | 2.7899065  |
| C    | -11.253052 | -5.7569461 | 2.2724876  | H    | -11.247285 | -6.7302834 | 1.777935   |
| C    | -13.721168 | -4.0542894 | 4.7401797  | H    | -12.647192 | -7.7615193 | 3.5685371  |
| C    | -14.150365 | -5.2734745 | 5.5878004  | H    | -12.253914 | -5.3698701 | 6.6644106  |
| C    | -13.952469 | -6.650284  | 4.9030534  | H    | -13.486284 | -4.3167005 | 7.4047021  |
| C    | -12.920917 | -6.7541979 | 3.8695031  | H    | -13.635991 | -6.0956755 | 7.5198293  |
| O    | -15.510716 | -5.1232979 | 6.0085719  | H    | -7.4352767 | -10.77717  | 1.6448985  |
| C    | -13.321317 | -5.2637959 | 6.884008   | H    | -7.0098325 | -9.6764653 | 2.9913417  |
| O    | -5.4947996 | -9.2190774 | 0.9276947  | H    | -8.5764126 | -9.510365  | 2.1642493  |
| C    | -7.5180378 | -9.7561146 | 2.0268327  | H    | -20.792564 | -3.5869782 | 4.634715   |
| O    | -6.1278526 | -7.0494066 | 2.5144618  | H    | -19.984487 | -6.3878395 | 7.7846449  |
| O    | -7.3512632 | -9.9345817 | -1.0223898 | H    | -0.6918778 | -9.7122937 | 2.1238186  |
| O    | -14.57768  | -7.623679  | 5.2990887  | H    | -0.7185877 | -9.2070796 | -2.138101  |

|                                                               |            |            |            |   |            |             |            |
|---------------------------------------------------------------|------------|------------|------------|---|------------|-------------|------------|
| O                                                             | -14.101044 | -2.9347328 | 5.0383938  | H | -17.950517 | -7.4589482  | 7.9655608  |
| C                                                             | -16.420256 | -5.1128589 | 4.9929517  | H | -16.650804 | -7.2880983  | 6.762142   |
| C                                                             | -17.821781 | -5.0742116 | 5.484504   | H | -16.759901 | -6.153633   | 8.0973684  |
| O                                                             | -16.071029 | -5.1301989 | 3.8290096  | H | -3.9655191 | -8.362447   | 2.7768884  |
| C                                                             | -4.7381948 | -8.4789238 | 0.0693545  | H | -3.8442728 | -10.113387  | 2.7863014  |
| C                                                             | -3.3055216 | -8.866151  | 0.0875603  | H | -2.5053552 | -9.1460676  | 3.4262884  |
| O                                                             | -5.2362821 | -7.6097334 | -0.6211742 | H | 1.1120747  | -9.7803395  | -0.8780174 |
| C                                                             | -18.752503 | -4.2737098 | 4.7859372  | H | -2.6782713 | -8.6859362  | -3.0331797 |
| C                                                             | -20.092625 | -4.2214193 | 5.1777245  | H | -22.34024  | -4.3980297  | 6.1216944  |
| C                                                             | -20.521623 | -4.9861427 | 6.2615842  | H | -19.047279 | -2.993988   | 3.4035524  |
| C                                                             | -19.617363 | -5.7931831 | 6.9548969  |   |            |             |            |
| <b>NImag</b>                                                  |            |            |            |   |            | 0           |            |
| <b><math>\Sigma</math> Electronic and thermal Free Energy</b> |            |            |            |   |            | -1819211.98 |            |
| <b>mol Fraction</b>                                           |            |            |            |   |            | 3.34E-18    |            |

**(8S, 13R, 3aR, 8aS, 12aR, 13aS)- Pavesiflonic acid - Conformer 7**

| Atom | X          | Y          | Z          | Atom | X          | Y          | Z          |
|------|------------|------------|------------|------|------------|------------|------------|
| C    | -7.5917875 | -8.9140614 | -0.380791  | C    | -18.112215 | -3.8330331 | 6.5091381  |
| C    | -8.582197  | -7.8618373 | -0.7365497 | C    | -2.6645919 | -9.2542928 | 1.2850052  |
| C    | -8.7600464 | -6.6676217 | 0.0791147  | C    | -1.3081542 | -9.5728437 | 1.2339951  |
| C    | -7.9928184 | -6.4594855 | 1.1921688  | C    | -0.6129774 | -9.5654882 | 0.0228323  |
| C    | -6.9516582 | -7.374634  | 1.6225868  | C    | -1.2666057 | -9.2240763 | -1.1603055 |
| C    | -6.9050018 | -8.7906873 | 0.9921071  | C    | -2.6208046 | -8.8825788 | -1.1245354 |
| C    | -9.3030601 | -8.0329891 | -1.8655237 | C    | -17.042004 | -3.0417924 | 7.2298921  |
| O    | -10.211008 | -7.1431036 | -2.3129607 | C    | -3.3432105 | -9.2864903 | 2.6373571  |
| C    | -10.425491 | -5.9994571 | -1.5827741 | O    | 0.708356   | -9.8984232 | 0.0570644  |
| C    | -9.7722207 | -5.7373386 | -0.4227607 | O    | -3.2818025 | -8.5616069 | -2.2686993 |
| C    | -11.39044  | -5.0943352 | -2.2868823 | O    | -21.747408 | -4.0656782 | 6.6899378  |
| C    | -11.655768 | -3.7688433 | -1.5407494 | O    | -18.583094 | -6.3247324 | 3.8568587  |
| C    | -10.413063 | -3.3312795 | -0.7462744 | H    | -8.0666359 | -5.5516192 | 1.779705   |
| C    | -10.107785 | -4.439116  | 0.2937074  | H    | -9.2043998 | -8.8960306 | -2.5117987 |
| C    | -11.350148 | -4.5931451 | 1.2193933  | H    | -12.329527 | -5.6363665 | -2.459097  |
| O    | -12.523207 | -4.824347  | 0.4978467  | H    | -10.966653 | -4.881549  | -3.275202  |
| C    | -9.2217948 | -3.0230742 | -1.639917  | H    | -11.912275 | -3.0016696 | -2.2788509 |
| C    | -12.814877 | -3.8854711 | -0.5479438 | H    | -10.633394 | -2.4050919 | -0.2009255 |
| O    | -8.0997706 | -2.8112434 | -0.9174315 | H    | -9.2666326 | -4.1249873 | 0.9129845  |
| O    | -9.253877  | -2.9393809 | -2.8484356 | H    | -13.717544 | -4.2736795 | -1.0260364 |
| O    | -11.438753 | -3.2952583 | 1.8991453  | H    | -13.048956 | -2.9055964 | -0.1128612 |
| C    | -12.25069  | -3.213729  | 2.9671014  | H    | -7.3839426 | -2.623596  | -1.5541441 |
| C    | -12.764832 | -4.2726039 | 3.6407242  | H    | -12.472464 | -2.1901179 | 3.2516042  |
| C    | -12.386946 | -5.6233003 | 3.2638801  | H    | -10.305036 | -5.6237667 | 2.7851422  |
| C    | -11.263072 | -5.712795  | 2.2578884  | H    | -11.268677 | -6.6764017 | 1.744601   |
| C    | -13.735154 | -4.0193842 | 4.7253196  | H    | -12.700413 | -7.7185586 | 3.5049397  |
| C    | -14.171631 | -5.2408132 | 5.5626747  | H    | -13.680778 | -6.0841024 | 7.4856426  |
| C    | -13.985883 | -6.6148865 | 4.8661508  | H    | -12.276502 | -5.3948883 | 6.6354634  |
| C    | -12.961866 | -6.712491  | 3.8209626  | H    | -13.473755 | -4.3099161 | 7.3869447  |
| O    | -15.529046 | -5.0798907 | 5.9886187  | H    | -7.5183518 | -10.784079 | 1.5537439  |
| C    | -13.339778 | -5.2569884 | 6.8572498  | H    | -7.0932475 | -9.7206276 | 2.9298867  |
| O    | -5.5471693 | -9.2392898 | 0.894365   | H    | -8.6471514 | -9.5127039 | 2.0885727  |
| C    | -7.5908727 | -9.7708297 | 1.957918   | H    | -21.008645 | -5.7757332 | 4.7525194  |
| O    | -6.1664251 | -7.0972125 | 2.5233906  | H    | -19.686814 | -2.911083  | 7.6629776  |
| O    | -7.3912899 | -9.8820738 | -1.0925424 | H    | -0.7679843 | -9.8288786 | 2.1392397  |
| O    | -14.601572 | -7.5864867 | 5.2726769  | H    | -0.7307306 | -9.2199306 | -2.1089808 |

|                                                               |            |            |            |   |            |              |            |
|---------------------------------------------------------------|------------|------------|------------|---|------------|--------------|------------|
| O                                                             | -14.131455 | -2.8996303 | 5.011824   | H | -16.264492 | -2.6775032   | 6.5539479  |
| C                                                             | -16.435908 | -4.9898785 | 4.974937   | H | -17.492115 | -2.1872919   | 7.7441906  |
| C                                                             | -17.816804 | -4.7502084 | 5.4695677  | H | -16.540626 | -3.6632379   | 7.9801864  |
| O                                                             | -16.102093 | -5.0968197 | 3.8115935  | H | -4.0309069 | -8.4500241   | 2.7827651  |
| C                                                             | -4.7694556 | -8.4903445 | 0.0629131  | H | -3.9343376 | -10.202243   | 2.7505549  |
| C                                                             | -3.3425978 | -8.8978734 | 0.0902728  | H | -2.5905461 | -9.2701747   | 3.431347   |
| O                                                             | -5.2466329 | -7.5984924 | -0.6133496 | H | 1.0751027  | -9.8482993   | -0.8394124 |
| C                                                             | -18.879707 | -5.434198  | 4.8403579  | H | -2.6709202 | -8.6502354   | -3.016601  |
| C                                                             | -20.202669 | -5.2282642 | 5.2402319  | H | -22.371294 | -4.6044983   | 6.1790099  |
| C                                                             | -20.477958 | -4.3190726 | 6.2607306  | H | -19.401515 | -6.7580456   | 3.5694084  |
| C                                                             | -19.439294 | -3.623097  | 6.8827722  |   |            |              |            |
| <b>NImag</b>                                                  |            |            |            |   |            | 0            |            |
| <b><math>\Sigma</math> Electronic and thermal Free Energy</b> |            |            |            |   |            | -1819211.801 |            |
| <b>mol Fraction</b>                                           |            |            |            |   |            | 2.47E-18     |            |

**Data S4.** Lowest energy conformer 3D structure, all overlaid 3D structures, cartesian coordinates, number of imaginary frequencies, and energy for (8*S*, 13*S*, 3*aS*, 8*aS*, 12*aS*, 13*aR*)- Pavesiflonic acid conformers.

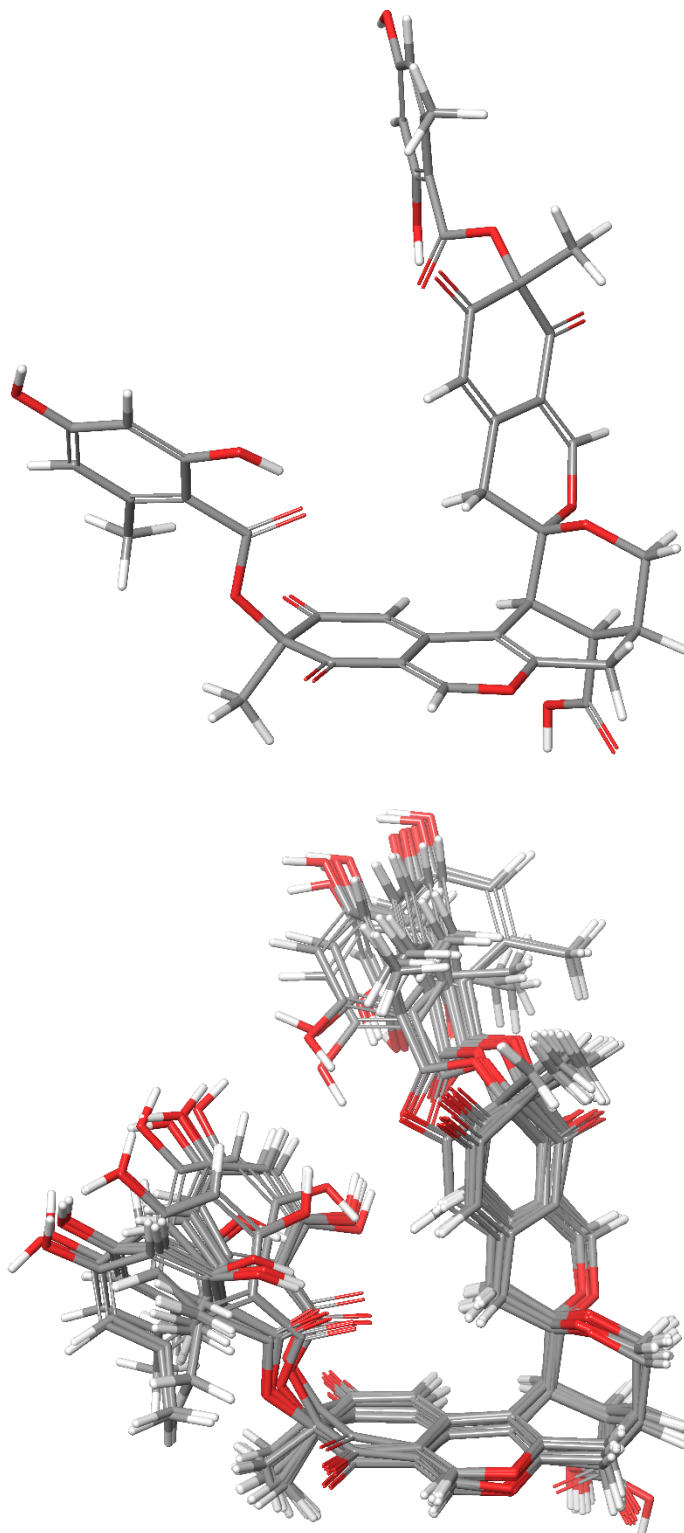

**(8S, 13S, 3aS, 8aS, 12aS, 13aR)- Pavesiflonic acid (3) - Conformer 1**

| Atom | X          | Y          | Z         | Atom | X          | Y          | Z         |
|------|------------|------------|-----------|------|------------|------------|-----------|
| C    | -1.4350631 | -8.9606827 | 0.9892467 | C    | -5.8429939 | -1.2427826 | 8.2931802 |
| C    | -2.4863633 | -9.8833183 | 1.4913629 | C    | 0.8253062  | -4.4900824 | 1.8484776 |
| C    | -2.5973905 | -10.193734 | 2.9101207 | C    | 1.1562349  | -3.1625144 | 2.0703561 |
| C    | -1.6112009 | -9.8590198 | 3.7910926 | C    | 0.3809532  | -2.3513211 | 2.9168008 |
| C    | -0.4409146 | -9.0872866 | 3.414587  | C    | -0.7582866 | -2.8499156 | 3.5305292 |
| C    | -0.2408646 | -8.6893541 | 1.9237422 | C    | -1.1338987 | -4.1766236 | 3.3023308 |
| C    | -3.3614659 | -10.420606 | 0.6121123 | C    | -7.2673971 | -1.6430015 | 8.60898   |
| O    | -4.3793901 | -11.231008 | 0.9755342 | C    | 1.7202006  | -5.2836312 | 0.9222888 |
| C    | -4.669247  | -11.343835 | 2.3174782 | O    | 0.7988339  | -1.0693018 | 3.0900075 |
| C    | -3.8601568 | -10.832581 | 3.2751071 | O    | -2.2544824 | -4.5804282 | 3.9218629 |
| C    | -5.9291917 | -12.122851 | 2.5521105 | O    | -3.7226457 | 1.599794   | 9.1134511 |
| C    | -6.380044  | -12.139701 | 4.0315625 | O    | -2.6934477 | -2.3004291 | 6.6310259 |
| C    | -5.1738112 | -12.120897 | 4.9862886 | H    | -1.6742705 | -10.103313 | 4.8456966 |
| C    | -4.3729543 | -10.829669 | 4.7020906 | H    | -3.3197412 | -10.2539   | -0.457193 |
| C    | -5.2974448 | -9.5884514 | 4.9130479 | H    | -5.7487727 | -13.15073  | 2.214195  |
| O    | -6.5130167 | -9.6989727 | 4.2262123 | H    | -6.7244261 | -11.71818  | 1.9133771 |
| C    | -4.3180319 | -13.372743 | 4.8799329 | H    | -6.9736857 | -13.043902 | 4.2022153 |
| C    | -7.2393449 | -10.924353 | 4.3886216 | H    | -5.5301003 | -12.081099 | 6.0242288 |
| O    | -3.1857497 | -13.267118 | 5.612047  | H    | -3.549544  | -10.748749 | 5.4113492 |
| O    | -4.6037369 | -14.368232 | 4.2511143 | H    | -7.6087349 | -11.00777  | 5.4194132 |
| O    | -5.548318  | -9.569641  | 6.3551694 | H    | -8.0994288 | -10.828789 | 3.7207206 |
| C    | -5.9434154 | -8.4094648 | 6.9130051 | H    | -2.7045659 | -14.110029 | 5.5070903 |
| C    | -6.0001495 | -7.2102395 | 6.2812469 | H    | -6.2337906 | -8.5273192 | 7.9520425 |
| C    | -5.5226715 | -7.0930452 | 4.9157647 | H    | -4.5832436 | -8.2657065 | 3.3733649 |
| C    | -4.6901631 | -8.2598443 | 4.4582442 | H    | -3.684687  | -8.1620138 | 4.8850372 |
| C    | -6.5135681 | -6.0296267 | 7.0057804 | H    | -5.3355158 | -5.9122468 | 3.1511341 |
| C    | -6.9553136 | -4.8331525 | 6.1336852 | H    | -8.8312272 | -5.7633461 | 5.5462606 |
| C    | -6.3812242 | -4.793233  | 4.6880099 | H    | -8.9127716 | -4.8114247 | 7.0502105 |
| C    | -5.717638  | -5.9869335 | 4.1651996 | H    | -8.8155519 | -3.9859018 | 5.4614244 |
| O    | -6.6305384 | -3.5997823 | 6.8087282 | H    | 1.8348008  | -9.2389696 | 2.0168712 |
| C    | -8.4870332 | -4.8504349 | 6.0440384 | H    | 0.7866702  | -10.528756 | 1.3826174 |
| O    | 0.1251024  | -7.2938016 | 1.8529653 | H    | 1.1753979  | -9.1287093 | 0.3515763 |
| C    | 0.9743514  | -9.4494815 | 1.3770064 | H    | -2.1642379 | -0.0654486 | 7.6621355 |
| O    | 0.4154963  | -8.7488909 | 4.221676  | H    | -6.0422947 | 0.5902918  | 9.4045408 |

|                                                               |            |            |            |   |            |              |           |
|---------------------------------------------------------------|------------|------------|------------|---|------------|--------------|-----------|
| O                                                             | -1.4677133 | -8.4844587 | -0.1317812 | H | 2.0273263  | -2.72455     | 1.5949723 |
| O                                                             | -6.5417009 | -3.7824505 | 4.0221584  | H | -1.3713114 | -2.249842    | 4.1976895 |
| O                                                             | -6.670077  | -5.9967279 | 8.2153399  | H | -7.6916707 | -0.9531499   | 9.3441593 |
| C                                                             | -5.3125713 | -3.3329552 | 6.9100268  | H | -7.895984  | -1.6213935   | 7.71325   |
| C                                                             | -4.9538344 | -2.0546456 | 7.5256892  | H | -7.3250044 | -2.6595519   | 9.0082184 |
| O                                                             | -4.4861068 | -4.137765  | 6.4635692  | H | 1.1502047  | -5.7905166   | 0.1383937 |
| C                                                             | -0.7670883 | -6.4271678 | 2.3770536  | H | 2.4462569  | -4.616731    | 0.448654  |
| C                                                             | -0.3402307 | -5.0345382 | 2.4753997  | H | 2.268551   | -6.0598987   | 1.4649477 |
| O                                                             | -1.865955  | -6.8493338 | 2.7740934  | H | 0.1826241  | -0.6171408   | 3.6884459 |
| C                                                             | -3.6123837 | -1.605354  | 7.3243549  | H | -2.4247582 | -5.5147303   | 3.650059  |
| C                                                             | -3.1902962 | -0.3755887 | 7.8399153  | H | -2.79521   | 1.7841082    | 8.8956117 |
| C                                                             | -4.0755366 | 0.4005174  | 8.5755339  | H | -3.0917293 | -3.1724033   | 6.37917   |
| C                                                             | -5.3888773 | -0.0363483 | 8.8071099  |   |            |              |           |
| <b>NImag</b>                                                  |            |            |            |   |            | 0            |           |
| <b><math>\Sigma</math> Electronic and thermal Free Energy</b> |            |            |            |   |            | -1819230.846 |           |
| <b>mol Fraction</b>                                           |            |            |            |   |            | 0.000174106  |           |

**(8S, 13S, 3aS, 8aS, 12aS, 13aR)- Pavesiflonic acid (3) - Conformer 2**

| Atom | X          | Y          | Z          | Atom | X          | Y          | Z          |
|------|------------|------------|------------|------|------------|------------|------------|
| C    | -0.9543728 | -9.458964  | 1.0443388  | C    | -6.9715152 | -0.9055068 | 8.7654366  |
| C    | -2.2288527 | -9.9833655 | 1.6045567  | C    | 2.2734487  | -5.4584775 | 1.1368253  |
| C    | -2.529875  | -9.910476  | 3.0291639  | C    | 2.8484109  | -4.2576179 | 0.7497731  |
| C    | -1.6248901 | -9.3910476 | 3.9130152  | C    | 2.0582768  | -3.1746775 | 0.3300125  |
| C    | -0.3436849 | -8.8410662 | 3.5088558  | C    | 0.6741788  | -3.2715907 | 0.3137729  |
| C    | 0.142955   | -9.0840266 | 2.0563314  | C    | 0.063164   | -4.4639853 | 0.7131274  |
| C    | -3.1123574 | -10.534754 | 0.7447757  | C    | -8.259872  | -0.9912728 | 7.9773487  |
| O    | -4.2952546 | -11.056338 | 1.1247388  | C    | 3.2045614  | -6.5545294 | 1.6060601  |
| C    | -4.6509115 | -10.9816   | 2.4499447  | O    | 2.7156146  | -2.0431179 | -0.0381155 |
| C    | -3.8522925 | -10.421734 | 3.3931713  | O    | -1.2784218 | -4.4773899 | 0.6910865  |
| C    | -5.9673449 | -11.658028 | 2.6831781  | O    | -5.5935618 | 1.4610766  | 11.163613  |
| C    | -6.4336131 | -11.613532 | 4.1534729  | O    | -3.6723305 | -2.4849709 | 9.3925499  |
| C    | -5.2294665 | -11.633929 | 5.1107774  | H    | -1.8369983 | -9.308394  | 4.9725474  |
| C    | -4.3766515 | -10.372555 | 4.8196056  | H    | -2.9416841 | -10.609313 | -0.3218907 |
| C    | -5.2686339 | -9.1181133 | 5.0630946  | H    | -5.854898  | -12.700863 | 2.3641575  |
| O    | -6.4528647 | -9.1626796 | 4.3170858  | H    | -6.7214626 | -11.209246 | 2.0236043  |
| C    | -4.427493  | -12.921899 | 5.0208429  | H    | -7.0711105 | -12.483906 | 4.3413371  |
| C    | -7.2426065 | -10.351973 | 4.4652519  | H    | -5.5834143 | -11.570034 | 6.1472056  |
| O    | -3.2972101 | -12.858336 | 5.7607992  | H    | -3.5458344 | -10.332917 | 5.5253488  |
| O    | -4.7518414 | -13.911714 | 4.4015927  | H    | -7.6529865 | -10.402125 | 5.481977   |
| O    | -5.5900651 | -9.1915006 | 6.4901432  | H    | -8.0720444 | -10.225276 | 3.7647437  |
| C    | -6.1199545 | -8.0931112 | 7.0583427  | H    | -2.8554008 | -13.724254 | 5.6713091  |
| C    | -6.1461665 | -6.859511  | 6.4971913  | H    | -6.5448688 | -8.2886613 | 8.0376035  |
| C    | -5.4671255 | -6.6212194 | 5.2361135  | H    | -4.4280287 | -7.6993377 | 3.6763278  |
| C    | -4.6158088 | -7.7709513 | 4.749459   | H    | -3.6442728 | -7.726331  | 5.2567062  |
| C    | -6.8528156 | -5.7719988 | 7.2096188  | H    | -4.9489129 | -5.2443279 | 3.6921511  |
| C    | -7.1377566 | -4.4991733 | 6.3840638  | H    | -9.2668355 | -4.7120352 | 6.6907184  |
| C    | -6.1944821 | -4.2629055 | 5.1753723  | H    | -8.8151577 | -3.6910987 | 5.2910996  |
| C    | -5.4993403 | -5.4214983 | 4.6118643  | H    | -8.6799556 | -5.4625904 | 5.1842234  |
| O    | -7.1325857 | -3.343367  | 7.2355529  | H    | 0.7171719  | -11.153438 | 2.4167361  |
| C    | -8.5764434 | -4.5998016 | 5.8501876  | H    | 1.5786957  | -10.363513 | 1.0714434  |
| O    | 0.8597491  | -7.9262843 | 1.5960054  | H    | 1.9825885  | -9.9534876 | 2.7685797  |
| C    | 1.1778624  | -10.219297 | 2.0783822  | H    | -3.6856148 | -0.4305469 | 10.842418  |
| O    | 0.3992592  | -8.2496688 | 4.2827955  | H    | -7.6002354 | 0.9323982  | 9.6907667  |
| O    | -0.7395356 | -9.4147836 | -0.1538091 | H    | 3.9250882  | -4.1286993 | 0.7734834  |
| O    | -6.1130797 | -3.1446502 | 4.6923454  | H    | 0.0400663  | -2.4421159 | 0.0138401  |



|                                                               |            |            |           |   |            |              |            |
|---------------------------------------------------------------|------------|------------|-----------|---|------------|--------------|------------|
| O                                                             | -7.290866  | -5.8869165 | 8.3413535 | H | -8.0690892 | -1.0753142   | 6.9036258  |
| C                                                             | -5.9582359 | -3.073804  | 7.8412766 | H | -8.8497305 | -1.8676519   | 8.2623542  |
| C                                                             | -5.9184612 | -1.8693135 | 8.6689164 | H | -8.8623872 | -0.0961577   | 8.156299   |
| O                                                             | -5.0001278 | -3.8454166 | 7.6855783 | H | 3.2090493  | -7.4029019   | 0.9145745  |
| C                                                             | 0.1205356  | -6.8073258 | 1.4587619 | H | 4.2241808  | -6.1658493   | 1.6802498  |
| C                                                             | 0.8491993  | -5.5923083 | 1.1071606 | H | 2.9051597  | -6.944736    | 2.5829868  |
| O                                                             | -1.1106951 | -6.8675559 | 1.6089073 | H | 2.0669549  | -1.3677559   | -0.2932044 |
| C                                                             | -4.7263142 | -1.6566898 | 9.4312666 | H | -1.5681502 | -5.3546225   | 1.0471332  |
| C                                                             | -4.6060102 | -0.5494471 | 10.277621 | H | -4.7407523 | 1.4733882    | 11.626616  |
| C                                                             | -5.647781  | 0.3620753  | 10.363723 | H | -3.8830874 | -3.197141    | 8.7354071  |
| C                                                             | -6.817254  | 0.1865643  | 9.6064917 |   |            |              |            |
| <b>NImag</b>                                                  |            |            |           |   |            | 0            |            |
| <b><math>\Sigma</math> Electronic and thermal Free Energy</b> |            |            |           |   |            | -1819235.305 |            |
| <b>mol Fraction</b>                                           |            |            |           |   |            | 0.325815679  |            |

**(8S, 13S, 3aS, 8aS, 12aS, 13aR)- Pavesiflonic acid (3) - Conformer 3**

| Atom | X          | Y          | Z          | Atom | X          | Y          | Z          |
|------|------------|------------|------------|------|------------|------------|------------|
| C    | -1.2663905 | -9.4125113 | 0.7355493  | C    | -6.8750741 | -1.2333719 | 9.1413272  |
| C    | -2.4741247 | -9.989356  | 1.3850069  | C    | 1.8381169  | -5.314748  | 0.6652502  |
| C    | -2.6581323 | -9.9585897 | 2.8309145  | C    | 2.3433325  | -4.0877837 | 0.2630163  |
| C    | -1.6988459 | -9.4311065 | 3.6503767  | C    | 1.4895014  | -3.021218  | -0.0635937 |
| C    | -0.4724827 | -8.8315873 | 3.1564558  | C    | 0.1122503  | -3.1615593 | 0.0306026  |
| C    | -0.1007085 | -9.0260308 | 1.6632646  | C    | -0.4281069 | -4.3814678 | 0.4482714  |
| C    | -3.4091868 | -10.5484   | 0.5869174  | C    | -8.2211695 | -1.3419673 | 8.4597744  |
| O    | -4.5407061 | -11.115455 | 1.0493116  | C    | 2.8368765  | -6.3909828 | 1.0294982  |
| C    | -4.787265  | -11.082591 | 2.400731   | O    | 2.0803914  | -1.8613357 | -0.4554692 |
| C    | -3.9300938 | -10.51966  | 3.2891461  | O    | -1.7659646 | -4.4368784 | 0.5354671  |
| C    | -6.05922   | -11.805488 | 2.7240014  | O    | -5.3745257 | 1.1201948  | 11.477961  |
| C    | -6.4029955 | -11.8098   | 4.2283137  | O    | -3.4894922 | -2.7206966 | 9.4548249  |
| C    | -5.1234884 | -11.81414  | 5.0825329  | H    | -1.8247734 | -9.3794239 | 4.725507   |
| C    | -4.335567  | -10.520016 | 4.7546516  | H    | -3.325307  | -10.59314  | -0.4917045 |
| C    | -5.2410878 | -9.3004165 | 5.1026429  | H    | -5.9428414 | -12.836578 | 2.3701266  |
| O    | -6.4812933 | -9.3652339 | 4.4557654  | H    | -6.8784208 | -11.36561  | 2.140427   |
| C    | -4.2939221 | -13.073651 | 4.8939296  | H    | -6.9965608 | -12.704072 | 4.4455637  |
| C    | -7.2204014 | -10.582059 | 4.6378162  | H    | -5.3919753 | -11.785437 | 6.1458418  |
| O    | -3.1084173 | -12.991395 | 5.5396144  | H    | -3.4506067 | -10.470346 | 5.3904763  |
| O    | -4.6391357 | -14.058695 | 4.2783631  | H    | -7.5433301 | -10.668648 | 5.6832198  |
| O    | -5.4405972 | -9.4168372 | 6.5490813  | H    | -8.1084774 | -10.465523 | 4.0113486  |
| C    | -5.9539297 | -8.3491934 | 7.1867956  | H    | -2.6500938 | -13.840592 | 5.3918947  |
| C    | -6.0632937 | -7.1044539 | 6.6614146  | H    | -6.2901118 | -8.5805762 | 8.192377   |
| C    | -5.4986073 | -6.8157378 | 5.3552902  | H    | -4.5608033 | -7.8240862 | 3.6883085  |
| C    | -4.6568008 | -7.9263683 | 4.7710488  | H    | -3.6483259 | -7.8626907 | 5.1977757  |
| C    | -6.7404293 | -6.0566285 | 7.4571163  | H    | -5.1514292 | -5.3878403 | 3.8096938  |
| C    | -7.1305887 | -4.7748096 | 6.6906083  | H    | -8.7373977 | -5.7590809 | 5.597191   |
| C    | -6.2981828 | -4.4809096 | 5.4149795  | H    | -9.2196197 | -5.0624526 | 7.1654639  |
| C    | -5.61813   | -5.603578  | 4.7667085  | H    | -8.9161734 | -3.9957202 | 5.7600132  |
| O    | -7.0893876 | -3.6393368 | 7.5680257  | H    | 1.816541   | -9.852764  | 2.2000912  |
| C    | -8.6049193 | -4.9089611 | 6.2742249  | H    | 0.5624979  | -11.083873 | 1.9230853  |
| O    | 0.5408638  | -7.836005  | 1.1751093  | H    | 1.2859073  | -10.236766 | 0.5319968  |
| C    | 0.9657077  | -10.128195 | 1.5717396  | H    | -3.4440032 | -0.7016803 | 10.952886  |
| O    | 0.3140865  | -8.2347222 | 3.8815446  | H    | -7.479632  | 0.5617407  | 10.161848  |
| O    | -1.15273   | -9.3345644 | -0.4746855 | H    | 3.4140042  | -3.9253399 | 0.2022852  |
| O    | -6.2902113 | -3.3497457 | 4.9557931  | H    | -0.5687829 | -2.3460142 | -0.195606  |

|                                                               |            |            |           |   |            |             |            |
|---------------------------------------------------------------|------------|------------|-----------|---|------------|-------------|------------|
| O                                                             | -7.0794252 | -6.211413  | 8.6177401 | H | -8.8332863 | -0.4709388  | 8.7105666  |
| C                                                             | -5.8774143 | -3.3463659 | 8.0819186 | H | -8.1175748 | -1.3949752  | 7.3722019  |
| C                                                             | -5.8052849 | -2.1606069 | 8.9340441 | H | -8.7589107 | -2.2431072  | 8.7695808  |
| O                                                             | -4.9128622 | -4.0831837 | 7.8283503 | H | 2.8102259  | -7.222758   | 0.3186156  |
| C                                                             | -0.240017  | -6.7381505 | 1.1271981 | H | 3.8470539  | -5.9717621  | 1.030642   |
| C                                                             | 0.4208592  | -5.4929635 | 0.7482996 | H | 2.6301911  | -6.812784   | 2.0172536  |
| O                                                             | -1.452319  | -6.8406839 | 1.3759644 | H | 1.3931471  | -1.2012417  | -0.6396287 |
| C                                                             | -4.5609562 | -1.9276047 | 9.6011149 | H | -1.9991897 | -5.3306089  | 0.8919677  |
| C                                                             | -4.4040877 | -0.8368603 | 10.462757 | H | -4.4870132 | 1.1490951   | 11.869488  |
| C                                                             | -5.4619406 | 0.0387163  | 10.6574   | H | -3.7325023 | -3.4238443  | 8.7991183  |
| C                                                             | -6.6843661 | -0.1565827 | 9.9945327 |   |            |             |            |
| <b>NImag</b>                                                  |            |            |           |   |            | 0           |            |
| <b><math>\Sigma</math> Electronic and thermal Free Energy</b> |            |            |           |   |            | -1819235.3  |            |
| <b>mol Fraction</b>                                           |            |            |           |   |            | 0.323063694 |            |

**(8S, 13S, 3aS, 8aS, 12aS, 13aR)- Pavesiflonic acid (3) - Conformer 4**

| Atom | X          | Y          | Z          | Atom | X          | Y          | Z          |
|------|------------|------------|------------|------|------------|------------|------------|
| C    | -1.2889943 | -9.2143536 | 0.8619252  | C    | -5.5870962 | -1.1964449 | 8.3296867  |
| C    | -2.400106  | -10.059542 | 1.3822394  | C    | 0.1917107  | -4.531711  | 2.1551396  |
| C    | -2.5203845 | -10.349144 | 2.8035611  | C    | 0.3825649  | -3.23432   | 2.6292164  |
| C    | -1.4904499 | -10.116899 | 3.6678203  | C    | -0.2562222 | -2.798279  | 3.7965638  |
| C    | -0.2477572 | -9.4894938 | 3.2641163  | C    | -1.0776579 | -3.6723905 | 4.50431    |
| C    | -0.1107563 | -8.9158678 | 1.8198268  | C    | -1.3431612 | -4.9443774 | 4.0015388  |
| C    | -3.3181739 | -10.546099 | 0.5199777  | C    | -6.791412  | -1.9384899 | 8.8667755  |
| O    | -4.3931285 | -11.275433 | 0.9060424  | C    | 0.9169663  | -4.9508185 | 0.8950131  |
| C    | -4.679492  | -11.340988 | 2.2488703  | O    | -0.0478417 | -1.5219092 | 4.2147986  |
| C    | -3.8259777 | -10.873914 | 3.1905885  | O    | -2.1853735 | -5.7700231 | 4.6811753  |
| C    | -5.9882749 | -12.025481 | 2.513265   | O    | -3.9519859 | 1.9663392  | 9.0849287  |
| C    | -6.4105412 | -12.007507 | 4.0023335  | O    | -2.7616556 | -1.3719795 | 5.9278346  |
| C    | -5.1894201 | -12.049197 | 4.9372411  | H    | -1.5486988 | -10.384398 | 4.7173057  |
| C    | -4.3197601 | -10.810923 | 4.6225263  | H    | -3.2768949 | -10.398479 | -0.5518425 |
| C    | -5.1629343 | -9.5123606 | 4.8243171  | H    | -5.8885717 | -13.06453  | 2.1761399  |
| O    | -6.4056744 | -9.5615337 | 4.1837201  | H    | -6.7663481 | -11.567826 | 1.8891878  |
| C    | -4.4094143 | -13.349567 | 4.8295496  | H    | -7.0506985 | -12.875755 | 4.1907603  |
| C    | -7.1934863 | -10.74504  | 4.3687348  | H    | -5.5259944 | -11.979582 | 5.9804468  |
| O    | -3.2549513 | -13.29902  | 5.5321696  | H    | -3.4829303 | -10.764861 | 5.3187955  |
| O    | -4.7681791 | -14.335502 | 4.2236278  | H    | -7.5455207 | -10.802646 | 5.407631   |
| O    | -5.369878  | -9.4474584 | 6.2816045  | H    | -8.0609295 | -10.605369 | 3.7182542  |
| C    | -5.6485261 | -8.2551104 | 6.8278318  | H    | -2.822596  | -14.167603 | 5.4242888  |
| C    | -5.6626912 | -7.0680548 | 6.1664079  | H    | -5.8874685 | -8.3280268 | 7.8844761  |
| C    | -5.2451095 | -7.0124588 | 4.7762223  | H    | -4.4161022 | -8.2658058 | 3.236673   |
| C    | -4.4939747 | -8.2333279 | 4.3221065  | H    | -3.4707496 | -8.1680949 | 4.7093019  |
| C    | -6.0372537 | -5.8334146 | 6.8778164  | H    | -5.0433073 | -5.8878681 | 2.9813155  |
| C    | -6.5305022 | -4.6816584 | 5.9777669  | H    | -8.38582   | -5.6963431 | 5.4647336  |
| C    | -6.0070752 | -4.6832227 | 4.5113631  | H    | -8.4731094 | -4.6964749 | 6.9379675  |
| C    | -5.4082365 | -5.9138414 | 4.0031958  | H    | -8.4344929 | -3.9229254 | 5.3219324  |
| O    | -6.2436851 | -3.4185994 | 6.6133051  | H    | 2.0167693  | -9.1853453 | 1.8495127  |
| C    | -8.0651466 | -4.7564632 | 5.9251925  | H    | 1.1416409  | -10.509311 | 1.048995   |
| O    | 0.0767825  | -7.4799195 | 1.9720767  | H    | 1.3181386  | -8.9502783 | 0.2100318  |
| C    | 1.1833977  | -9.4230339 | 1.1854787  | H    | -2.4657304 | 0.8398714  | 7.1263958  |
| O    | 0.6977291  | -9.3504435 | 4.03199    | H    | -5.8876366 | 0.433982   | 9.7030329  |
| O    | -1.2569524 | -8.8295011 | -0.2943346 | H    | 1.0197088  | -2.5394198 | 2.0922854  |
| O    | -6.1682774 | -3.6817262 | 3.831617   | H    | -1.4918287 | -3.3846901 | 5.4628625  |

|                                                               |            |            |           |   |            |             |           |
|---------------------------------------------------------------|------------|------------|-----------|---|------------|-------------|-----------|
| O                                                             | -6.0395981 | -5.7171229 | 8.0933639 | H | -7.1162538 | -1.4844377  | 9.8072622 |
| C                                                             | -4.9730445 | -2.9972902 | 6.6216691 | H | -7.627488  | -1.8950905  | 8.1606813 |
| C                                                             | -4.7486234 | -1.7127488 | 7.2972171 | H | -6.5808181 | -2.9971158  | 9.0405014 |
| O                                                             | -4.0747192 | -3.6409534 | 6.0573134 | H | 0.259318   | -5.4728234  | 0.1929533 |
| C                                                             | -1.0182667 | -6.7739012 | 2.3608178 | H | 1.3342241  | -4.0756998  | 0.3886569 |
| C                                                             | -0.7022693 | -5.4026865 | 2.829358  | H | 1.7385264  | -5.6369173  | 1.1266127 |
| O                                                             | -2.1307849 | -7.2733574 | 2.3478701 | H | -0.6981337 | -1.3097913  | 4.9091366 |
| C                                                             | -3.6100847 | -0.9548347 | 6.8995115 | H | -2.7170134 | -5.2305925  | 5.2938457 |
| C                                                             | -3.3328477 | 0.2847971  | 7.4730265 | H | -3.1610429 | 2.3830664   | 8.7073282 |
| C                                                             | -4.1672494 | 0.7723855  | 8.473786  | H | -3.0599567 | -2.2659643  | 5.6410102 |
| C                                                             | -5.2764887 | 0.0295335  | 8.903375  |   |            |             |           |
| <b>NImag</b>                                                  |            |            |           |   |            | 0           |           |
| <b><math>\Sigma</math> Electronic and thermal Free Energy</b> |            |            |           |   |            | -1819222.12 |           |
| <b>mol Fraction</b>                                           |            |            |           |   |            | 6.88E-11    |           |

**(8S, 13S, 3aS, 8aS, 12aS, 13aR)- Pavesiflonic acid (3) - Conformer 5**

| Atom | X          | Y          | Z          | Atom | X          | Y          | Z          |
|------|------------|------------|------------|------|------------|------------|------------|
| C    | -0.9956945 | -9.4784692 | 0.9871689  | C    | -6.9096386 | -0.9275804 | 8.7928584  |
| C    | -2.2637665 | -10.001887 | 1.5626698  | C    | 2.2372961  | -5.481092  | 1.044879   |
| C    | -2.5469859 | -9.9300523 | 2.9909807  | C    | 2.8088622  | -4.2804516 | 0.6521323  |
| C    | -1.6305494 | -9.4124031 | 3.8640073  | C    | 2.0149132  | -3.1964051 | 0.2425576  |
| C    | -0.3539123 | -8.8632972 | 3.4444638  | C    | 0.6306216  | -3.2919573 | 0.2424786  |
| C    | 0.1144405  | -9.1054821 | 1.9858187  | C    | 0.0231743  | -4.4840933 | 0.6479854  |
| C    | -3.1585395 | -10.551361 | 0.713386   | C    | -8.2081409 | -1.0119928 | 8.0214626  |
| O    | -4.3372598 | -11.071919 | 1.1074814  | C    | 3.1727565  | -6.5784069 | 1.5023784  |
| C    | -4.6762299 | -10.998316 | 2.4371106  | O    | 2.6689902  | -2.0651589 | -0.1323075 |
| C    | -3.8653033 | -10.440324 | 3.3708928  | O    | -1.3185991 | -4.4962001 | 0.6417224  |
| C    | -5.9903343 | -11.673671 | 2.6860433  | O    | -5.499883  | 1.4359441  | 11.175521  |
| C    | -6.4380732 | -11.630504 | 4.1621242  | O    | -3.6032815 | -2.5090003 | 9.3757247  |
| C    | -5.2220276 | -11.65313  | 5.1042341  | H    | -1.8293768 | -9.3305119 | 4.9261725  |
| C    | -4.3717365 | -10.392237 | 4.8038358  | H    | -3.0011894 | -10.625084 | -0.3553849 |
| C    | -5.2594135 | -9.1372502 | 5.0598508  | H    | -5.8829869 | -12.716223 | 2.3643628  |
| O    | -6.4529568 | -9.1798428 | 4.3288157  | H    | -6.7522093 | -11.223304 | 2.0365373  |
| C    | -4.4224835 | -12.941751 | 5.0027497  | H    | -7.0739489 | -12.500532 | 4.3569479  |
| C    | -7.241909  | -10.368576 | 4.4855027  | H    | -5.5629011 | -11.590088 | 6.1450842  |
| O    | -3.2828196 | -12.880041 | 5.7283239  | H    | -3.5321048 | -10.354161 | 5.4991522  |
| O    | -4.7556143 | -13.930585 | 4.3866046  | H    | -7.6395395 | -10.419523 | 5.5072389  |
| O    | -5.5629349 | -9.2119663 | 6.4908579  | H    | -8.0799339 | -10.240259 | 3.7955959  |
| C    | -6.0846657 | -8.1137457 | 7.066846   | H    | -2.8429969 | -13.746269 | 5.6322908  |
| C    | -6.1168415 | -6.8795024 | 6.5074122  | H    | -6.4974146 | -8.3099653 | 8.0511663  |
| C    | -5.4534625 | -6.6403861 | 5.2381769  | H    | -4.4348462 | -7.7176449 | 3.6643296  |
| C    | -4.6093232 | -7.7903246 | 4.7396329  | H    | -3.6315139 | -7.7471648 | 5.2348062  |
| C    | -6.8135164 | -5.7921703 | 7.2298473  | H    | -4.9534233 | -5.2621713 | 3.6893848  |
| C    | -7.1077445 | -4.5182112 | 6.4093146  | H    | -9.2329963 | -4.7299649 | 6.7421584  |
| C    | -6.1794393 | -4.281379  | 5.1892043  | H    | -8.7980187 | -3.7078273 | 5.3381175  |
| C    | -5.4924264 | -5.4399403 | 4.6157245  | H    | -8.6653878 | -5.4793044 | 5.2276873  |
| O    | -7.0911396 | -3.3633371 | 7.2618763  | H    | 1.961883   | -9.9774307 | 2.6744352  |
| C    | -8.5530328 | -4.6172958 | 5.8932308  | H    | 0.6909355  | -11.175791 | 2.3373289  |
| O    | 0.826667   | -7.9480234 | 1.5177462  | H    | 1.5364887  | -10.385584 | 0.9821037  |
| C    | 1.1483682  | -10.241836 | 1.9940754  | H    | -3.597008  | -0.4561267 | 10.827773  |
| O    | 0.3991149  | -8.2732182 | 4.2096079  | H    | -7.5256396 | 0.9095461  | 9.7282222  |
| O    | -0.795578  | -9.4335979 | -0.2134951 | H    | 3.885864   | -4.1525716 | 0.6634329  |
| O    | -6.103071  | -3.1626388 | 4.7064786  | H    | -0.0061632 | -2.4616106 | -0.0492745 |

|                                                               |            |            |           |   |            |              |            |
|---------------------------------------------------------------|------------|------------|-----------|---|------------|--------------|------------|
| O                                                             | -7.2373522 | -5.9079096 | 8.3669036 | H | -8.0313263 | -1.0945699   | 6.945233   |
| C                                                             | -5.9091187 | -3.0951664 | 7.8532185 | H | -8.7944367 | -1.88866     | 8.3128579  |
| C                                                             | -5.8583007 | -1.8916902 | 8.681715  | H | -8.8080841 | -0.1170105   | 8.2094736  |
| O                                                             | -4.9534877 | -3.867106  | 7.6845723 | H | 3.1687473  | -7.4260405   | 0.8099719  |
| C                                                             | 0.0870232  | -6.8281335 | 1.3908282 | H | 4.1934727  | -6.1906337   | 1.5654198  |
| C                                                             | 0.81268    | -5.6135164 | 1.0317427 | H | 2.8840952  | -6.9694222   | 2.4822099  |
| O                                                             | -1.1423406 | -6.8872087 | 1.5558835 | H | 2.0180219  | -1.3889161   | -0.3790465 |
| C                                                             | -4.6563388 | -1.6803428 | 9.428877  | H | -1.60499   | -5.3733131   | 1.0007337  |
| C                                                             | -4.5246638 | -0.574046  | 10.274771 | H | -4.6411337 | 1.447472     | 11.627433  |
| C                                                             | -5.5648628 | 0.3377966  | 10.375263 | H | -3.8226643 | -3.2202986   | 8.7204732  |
| C                                                             | -6.7440926 | 0.1635213  | 9.63303   |   |            |              |            |
| <b>NImag</b>                                                  |            |            |           |   |            | 0            |            |
| <b><math>\Sigma</math> Electronic and thermal Free Energy</b> |            |            |           |   |            | -1819235.304 |            |
| <b>mol Fraction</b>                                           |            |            |           |   |            | 0.325125493  |            |

**(8S, 13S, 3aS, 8aS, 12aS, 13aR)- Pavesiflonic acid (3) - Conformer 6**

| Atom | X          | Y          | Z         | Atom | X          | Y          | Z          |
|------|------------|------------|-----------|------|------------|------------|------------|
| C    | -0.9469616 | -9.4277089 | 1.311586  | C    | -5.6975811 | -0.8294594 | 8.0652988  |
| C    | -2.1069354 | -10.229466 | 1.7796404 | C    | 0.4748825  | -4.9611565 | 0.6951748  |
| C    | -2.4513376 | -10.319022 | 3.1927619 | C    | 0.6317117  | -3.6274007 | 0.315526   |
| C    | -1.6070085 | -9.8398294 | 4.1516731 | C    | -0.1149911 | -2.6106174 | 0.9204604  |
| C    | -0.4185307 | -9.0586519 | 3.8503954 | C    | -1.0362497 | -2.9104176 | 1.9197133  |
| C    | 0.0341855  | -8.8927096 | 2.3740096 | C    | -1.2156144 | -4.2386744 | 2.3066706  |
| C    | -2.8694384 | -10.852058 | 0.8548969 | C    | -6.777499  | -0.6004842 | 7.0310033  |
| O    | -3.9909931 | -11.539537 | 1.1564001 | C    | 1.3078045  | -5.9985052 | -0.0278172 |
| C    | -4.4786546 | -11.456462 | 2.4404652 | O    | 0.0225979  | -1.3010097 | 0.5692744  |
| C    | -3.779912  | -10.880778 | 3.4489381 | O    | -2.06548   | -4.5624945 | 3.3021991  |
| C    | -5.8313548 | -12.093424 | 2.5463531 | O    | -4.2702245 | 1.169272   | 10.751851  |
| C    | -6.5096296 | -11.856809 | 3.9111339 | O    | -3.1390888 | -3.2006033 | 9.3323744  |
| C    | -5.4698219 | -11.868131 | 5.0452962 | H    | -1.8337087 | -9.9222082 | 5.2090491  |
| C    | -4.4854221 | -10.704821 | 4.7873586 | H    | -2.6515712 | -10.84711  | -0.2057124 |
| C    | -5.2863704 | -9.3644432 | 4.7742335 | H    | -5.7120306 | -13.170523 | 2.3778611  |
| O    | -6.3441539 | -9.3954039 | 3.8585072 | H    | -6.4623104 | -11.716512 | 1.7314321  |
| C    | -4.7756053 | -13.211929 | 5.1969061 | H    | -7.2460366 | -12.65085  | 4.0746561  |
| C    | -7.2415762 | -10.510968 | 3.9760627 | H    | -5.9705327 | -11.678287 | 6.003603   |
| O    | -3.7502394 | -13.147924 | 6.0766469 | H    | -3.7617541 | -10.654915 | 5.6019902  |
| O    | -5.1001556 | -14.23907  | 4.6417994 | H    | -7.8078545 | -10.433836 | 4.9133069  |
| O    | -5.8380363 | -9.2367039 | 6.1293465 | H    | -7.9386989 | -10.396087 | 3.1420516  |
| C    | -6.2623188 | -8.0218793 | 6.5196302 | H    | -3.3754022 | -14.047444 | 6.1344117  |
| C    | -5.9860285 | -6.8491991 | 5.8913282 | H    | -6.8595294 | -8.0591428 | 7.4253853  |
| C    | -5.0914709 | -6.8410173 | 4.7558878 | H    | -4.1285293 | -8.1873423 | 3.3903232  |
| C    | -4.4302294 | -8.1506659 | 4.4369481 | H    | -3.5092003 | -8.2000657 | 5.0282768  |
| C    | -6.5423013 | -5.5859377 | 6.4205851 | H    | -3.96678   | -5.7595606 | 3.3244155  |
| C    | -6.2729788 | -4.3077043 | 5.577546  | H    | -7.7075201 | -4.8536719 | 4.0311766  |
| C    | -5.0582385 | -4.3985697 | 4.6259549 | H    | -8.3915198 | -3.9316202 | 5.3950126  |
| C    | -4.7066259 | -5.711449  | 4.1157098 | H    | -7.3891901 | -3.1074109 | 4.164356   |
| O    | -6.1428854 | -3.1691883 | 6.4397847 | H    | 2.0902347  | -9.1872547 | 2.9189769  |
| C    | -7.528258  | -4.03204   | 4.7314516 | H    | 1.2746658  | -10.679682 | 2.3986363  |
| O    | 0.3072298  | -7.4984324 | 2.1064778 | H    | 1.7420216  | -9.4666238 | 1.1807479  |
| C    | 1.3803171  | -9.6069422 | 2.2023282 | H    | -2.9072345 | -1.168211  | 10.791938  |
| O    | 0.2570134  | -8.533484  | 4.726514  | H    | -6.0001226 | 1.1360634  | 8.8863917  |
| O    | -0.7363562 | -9.230214  | 0.1253287 | H    | 1.339297   | -3.376778  | -0.4722841 |
| O    | -4.4590009 | -3.3730004 | 4.2986816 | H    | -1.5950388 | -2.1125382 | 2.398561   |



|                                                               |            |            |           |   |            |              |            |
|---------------------------------------------------------------|------------|------------|-----------|---|------------|--------------|------------|
| O                                                             | -7.2506611 | -5.5225947 | 7.4100001 | H | -6.3974099 | -0.740889    | 6.0150031  |
| C                                                             | -5.1155675 | -3.2139525 | 7.3142626 | H | -7.6103382 | -1.2989792   | 7.1552651  |
| C                                                             | -4.9376235 | -2.0380085 | 8.1645507 | H | -7.1644104 | 0.4185706    | 7.1205904  |
| O                                                             | -4.4013903 | -4.2256668 | 7.3641265 | H | 0.7178008  | -6.8666734   | -0.333686  |
| C                                                             | -0.7849653 | -6.6871671 | 2.0733772 | H | 1.7642296  | -5.5571679   | -0.9191822 |
| C                                                             | -0.4688313 | -5.2864114 | 1.7011043 | H | 2.1103778  | -6.3745014   | 0.6153129  |
| O                                                             | -1.8982858 | -7.1319053 | 2.3076146 | H | 0.7027794  | -1.2307558   | -0.1188477 |
| C                                                             | -3.9190808 | -2.122905  | 9.1665739 | H | -2.6806922 | -3.8336533   | 3.5363998  |
| C                                                             | -3.6878772 | -1.058429  | 10.04443  | H | -3.5587829 | 0.9727317    | 11.381973  |
| C                                                             | -4.4458806 | 0.0974252  | 9.9330242 | H | -3.3930884 | -3.8579899   | 8.6346011  |
| C                                                             | -5.4388884 | 0.2098849  | 8.9464113 |   |            |              |            |
| <b>NImag</b>                                                  |            |            |           |   |            | 0            |            |
| <b><math>\Sigma</math> Electronic and thermal Free Energy</b> |            |            |           |   |            | -1819227.052 |            |
| <b>mol Fraction</b>                                           |            |            |           |   |            | 2.86E-07     |            |

**(8S, 13S, 3aS, 8aS, 12aS, 13aR)- Pavesiflonic acid (3) - Conformer 7**

| Atom | X          | Y          | Z          | Atom | X          | Y          | Z         |
|------|------------|------------|------------|------|------------|------------|-----------|
| C    | -1.1629804 | -9.2036157 | 1.069948   | C    | -5.2063355 | -0.7028233 | 6.8045841 |
| C    | -2.2690637 | -10.082874 | 1.5382936  | C    | -0.0477724 | -4.4311549 | 1.7853587 |
| C    | -2.4834435 | -10.330365 | 2.9566339  | C    | 0.0380943  | -3.0590475 | 2.0106455 |
| C    | -1.539742  | -10.003627 | 3.8861489  | C    | -0.6656647 | -2.4648684 | 3.0636568 |
| C    | -0.3209841 | -9.2892281 | 3.5598609  | C    | -1.4618026 | -3.2331089 | 3.9095806 |
| C    | -0.0789952 | -8.8068845 | 2.0979911  | C    | -1.5724011 | -4.6097706 | 3.6886766 |
| C    | -3.1019959 | -10.631469 | 0.6277923  | C    | -6.3817077 | -0.6953236 | 5.8514448 |
| O    | -4.1760233 | -11.387003 | 0.9577098  | C    | 0.7281814  | -5.0206052 | 0.6272117 |
| C    | -4.5576135 | -11.424321 | 2.2785123  | O    | -0.5322298 | -1.1159801 | 3.2209844 |
| C    | -3.7898822 | -10.904599 | 3.2653995  | O    | -2.3063762 | -5.3884315 | 4.5128825 |
| C    | -5.8665561 | -12.133657 | 2.4636969  | O    | -3.3574898 | 1.826682   | 8.6661327 |
| C    | -6.4040783 | -12.07572  | 3.9133509  | O    | -2.7579289 | -2.9351569 | 8.3936093 |
| C    | -5.2567091 | -12.069433 | 4.9379389  | H    | -1.6683176 | -10.227383 | 4.9395506 |
| C    | -4.3877877 | -10.822706 | 4.6565608  | H    | -2.9861243 | -10.514332 | -0.442354 |
| C    | -5.2684552 | -9.5374557 | 4.7695148  | H    | -5.7188863 | -13.180593 | 2.171717  |
| O    | -6.4513254 | -9.6236846 | 4.0252274  | H    | -6.602364  | -11.714843 | 1.7654587 |
| C    | -4.4500603 | -13.357591 | 4.9271406  | H    | -7.0445939 | -12.948309 | 4.0796536 |
| C    | -7.2322352 | -10.815824 | 4.1786938  | H    | -5.6717219 | -11.977457 | 5.9505811 |
| O    | -3.3546706 | -13.268176 | 5.7157225  | H    | -3.604797  | -10.746897 | 5.4106485 |
| O    | -4.7439276 | -14.366495 | 4.3237123  | H    | -7.666835  | -10.852233 | 5.1867962 |
| O    | -5.5993226 | -9.4601093 | 6.1991012  | H    | -8.0461359 | -10.709988 | 3.4564813 |
| C    | -5.9297374 | -8.2639328 | 6.7116035  | H    | -2.9032631 | -14.132273 | 5.6658667 |
| C    | -5.8807385 | -7.0782807 | 6.0509943  | H    | -6.2619032 | -8.3318433 | 7.7428403 |
| C    | -5.3507272 | -7.0286655 | 4.7024813  | H    | -4.4325674 | -8.2945497 | 3.2248454 |
| C    | -4.5801839 | -8.2555552 | 4.3028444  | H    | -3.583271  | -8.1845268 | 4.7532262 |
| C    | -6.3099698 | -5.845791  | 6.7390869  | H    | -4.9677435 | -5.9053719 | 2.9376329 |
| C    | -6.5982497 | -4.6279115 | 5.8310387  | H    | -8.5800474 | -4.4095571 | 6.6588418 |
| C    | -5.955375  | -4.6625186 | 4.4162105  | H    | -8.354994  | -3.6470761 | 5.0522891 |
| C    | -5.4206421 | -5.9242502 | 3.923571   | H    | -8.520997  | -5.4132504 | 5.1876763 |
| O    | -6.1970165 | -3.4134621 | 6.5034319  | H    | 2.0448993  | -9.0079218 | 2.3216861 |
| C    | -8.1209616 | -4.5163562 | 5.6722893  | H    | 1.2734228  | -10.416974 | 1.5596922 |
| O    | 0.0581386  | -7.3607386 | 2.1432858  | H    | 1.4820904  | -8.9212258 | 0.6175773 |
| C    | 1.2763672  | -9.3225481 | 1.6126021  | H    | -2.1665873 | -0.5103873 | 9.2544014 |
| O    | 0.5265225  | -9.0182089 | 4.4031956  | H    | -5.2848019 | 1.4399147  | 7.0408928 |
| O    | -1.064654  | -8.8526097 | -0.0940765 | H    | 0.6415829  | -2.4284731 | 1.3662691 |
| O    | -5.9350903 | -3.6296935 | 3.7573033  | H    | -2.0009741 | -2.7816015 | 4.7394284 |

|                                                               |            |            |           |   |            |              |            |
|---------------------------------------------------------------|------------|------------|-----------|---|------------|--------------|------------|
| O                                                             | -6.5143066 | -5.7762819 | 7.9395945 | H | -6.2304202 | -1.3599543   | 4.9969976  |
| C                                                             | -4.8674447 | -3.2228748 | 6.6262791 | H | -7.2924484 | -1.0335274   | 6.3576439  |
| C                                                             | -4.5131428 | -1.88929   | 7.1660146 | H | -6.5557833 | 0.3203163    | 5.4841701  |
| O                                                             | -4.066414  | -4.092607  | 6.3112883 | H | 0.1331854  | -5.7334279   | 0.0481975  |
| C                                                             | -1.0863192 | -6.6713422 | 2.3959689 | H | 1.0651608  | -4.2262675   | -0.0452615 |
| C                                                             | -0.8728246 | -5.2223839 | 2.6204122 | H | 1.6101408  | -5.5641168   | 0.9829701  |
| O                                                             | -2.1661734 | -7.2378893 | 2.4357959 | H | -1.1041247 | -0.8272985   | 3.9495321  |
| C                                                             | -3.4083369 | -1.7942562 | 8.0448273 | H | -2.7738485 | -4.844419    | 5.1787867  |
| C                                                             | -3.0102617 | -0.5614036 | 8.5672138 | H | -2.5989183 | 1.7479074    | 9.2656287  |
| C                                                             | -3.6996579 | 0.594192   | 8.2012065 | H | -2.073564  | -2.7218931   | 9.0470622  |
| C                                                             | -4.7813632 | 0.5203009  | 7.3192841 |   |            |              |            |
| <b>NImag</b>                                                  |            |            |           |   |            | 0            |            |
| <b><math>\Sigma</math> Electronic and thermal Free Energy</b> |            |            |           |   |            | -1819215.677 |            |
| <b>mol Fraction</b>                                           |            |            |           |   |            | 1.29E-15     |            |

**(8S, 13S, 3aS, 8aS, 12aS, 13aR)- Pavesiflonic acid (3) - Conformer 8**

| Atom | X          | Y          | Z          | Atom | X          | Y          | Z          |
|------|------------|------------|------------|------|------------|------------|------------|
| C    | -0.9900681 | -9.4383175 | 0.9762459  | C    | -6.5195453 | -0.7342565 | 8.3225511  |
| C    | -2.2553471 | -9.9683493 | 1.5513903  | C    | 2.2455806  | -5.4420443 | 1.0570725  |
| C    | -2.5350812 | -9.9076596 | 2.98099    | C    | 2.8183722  | -4.2403547 | 0.668972   |
| C    | -1.6183518 | -9.3920822 | 3.855131   | C    | 2.025511   | -3.1555055 | 0.2596845  |
| C    | -0.3438289 | -8.8380491 | 3.4361269  | C    | 0.6412695  | -3.2510139 | 0.2557628  |
| C    | 0.1217449  | -9.0712487 | 1.9749969  | C    | 0.0326261  | -4.4440989 | 0.6569829  |
| C    | -3.1509753 | -10.513596 | 0.7002519  | C    | -7.3161762 | -0.6354468 | 7.0394897  |
| O    | -4.3265884 | -11.041156 | 1.0934186  | C    | 3.179495   | -6.5404951 | 1.5151342  |
| C    | -4.6607622 | -10.981841 | 2.4252368  | O    | 2.6804687  | -2.0230375 | -0.1108452 |
| C    | -3.8495269 | -10.427822 | 3.3611815  | O    | -1.3090243 | -4.4559587 | 0.6476047  |
| C    | -5.9693471 | -11.668339 | 2.6724937  | O    | -5.6423084 | 1.5588063  | 11.020007  |
| C    | -6.4108166 | -11.644258 | 4.1508539  | O    | -4.5343571 | -3.0710489 | 10.341462  |
| C    | -5.1902564 | -11.668169 | 5.0871429  | H    | -1.8154689 | -9.3167274 | 4.9180623  |
| C    | -4.3502506 | -10.397866 | 4.7966335  | H    | -2.9963583 | -10.578025 | -0.369523  |
| C    | -5.2464661 | -9.1525243 | 5.0710705  | H    | -5.8565337 | -12.706518 | 2.3387185  |
| O    | -6.441539  | -9.196491  | 4.3407939  | H    | -6.7370198 | -11.215727 | 2.0314196  |
| C    | -4.3822873 | -12.949824 | 4.9685829  | H    | -7.0395572 | -12.520915 | 4.3391438  |
| C    | -7.2218665 | -10.391063 | 4.4903714  | H    | -5.526746  | -11.618098 | 6.1300854  |
| O    | -3.2401248 | -12.888511 | 5.6906174  | H    | -3.507889  | -10.361188 | 5.488716   |
| O    | -4.7102941 | -13.934525 | 4.3429213  | H    | -7.6142564 | -10.45461  | 5.5134289  |
| O    | -5.5450864 | -9.2474038 | 6.499867   | H    | -8.0641982 | -10.26244  | 3.8056994  |
| C    | -6.0767908 | -8.159551  | 7.0902834  | H    | -2.795174  | -13.750654 | 5.5825432  |
| C    | -6.1190578 | -6.9193906 | 6.5467738  | H    | -6.487793  | -8.3718051 | 8.0718407  |
| C    | -5.4597383 | -6.6602273 | 5.2803552  | H    | -4.4378493 | -7.7097699 | 3.6895658  |
| C    | -4.6081416 | -7.7969336 | 4.764538   | H    | -3.6293692 | -7.7513031 | 5.2576427  |
| C    | -6.8270266 | -5.8462027 | 7.2824021  | H    | -4.9731001 | -5.2569275 | 3.7500814  |
| C    | -7.1212802 | -4.5545656 | 6.4880086  | H    | -9.2437399 | -4.7635705 | 6.8243894  |
| C    | -6.1934262 | -4.303708  | 5.2710679  | H    | -8.8132008 | -3.7234625 | 5.4335251  |
| C    | -5.5090282 | -5.4518245 | 4.6747772  | H    | -8.6882025 | -5.4939462 | 5.2955302  |
| O    | -7.0975858 | -3.4222269 | 7.3639451  | H    | 1.9699336  | -9.9481426 | 2.6553393  |
| C    | -8.5682702 | -4.6422111 | 5.9731881  | H    | 0.697997   | -11.143902 | 2.3128033  |
| O    | 0.8338596  | -7.9114419 | 1.512692   | H    | 1.5418061  | -10.34569  | 0.9611375  |
| C    | 1.1552856  | -10.208046 | 1.9745847  | H    | -4.4931332 | -0.7844294 | 11.661107  |
| O    | 0.4109408  | -8.2520773 | 4.2028329  | H    | -6.8851388 | 1.3388483  | 8.7992635  |
| O    | -0.7927395 | -9.3846446 | -0.2246101 | H    | 3.8953415  | -4.1124624 | 0.6838935  |
| O    | -6.1077267 | -3.1790974 | 4.7985163  | H    | 0.0052486  | -2.4198266 | -0.0353017 |

|                                                               |            |            |           |   |            |              |            |
|---------------------------------------------------------------|------------|------------|-----------|---|------------|--------------|------------|
| O                                                             | -7.264038  | -5.9909985 | 8.4108773 | H | -6.837234  | -1.1573437   | 6.2075976  |
| C                                                             | -5.8809417 | -3.1727232 | 7.9280496 | H | -8.3073286 | -1.0857643   | 7.1641981  |
| C                                                             | -5.870512  | -1.9261273 | 8.7353728 | H | -7.4538467 | 0.4152643    | 6.766902   |
| O                                                             | -4.9400071 | -3.9231737 | 7.7592099 | H | 4.1995028  | -6.1520433   | 1.5856077  |
| C                                                             | 0.0945541  | -6.7906115 | 1.3923599 | H | 2.8855109  | -6.9361718   | 2.4914964  |
| C                                                             | 0.8212126  | -5.5744715 | 1.0393987 | H | 3.1802391  | -7.3850706   | 0.8189678  |
| O                                                             | -1.1345739 | -6.849526  | 1.5569602 | H | 2.029697   | -1.3467331   | -0.3578742 |
| C                                                             | -5.1346127 | -1.9188707 | 9.9413858 | H | -1.5967719 | -5.3330084   | 1.0057272  |
| C                                                             | -5.0537184 | -0.7662289 | 10.726957 | H | -5.1047648 | 1.42103      | 11.815428  |
| C                                                             | -5.6916027 | 0.3990337  | 10.304368 | H | -4.1057013 | -2.9190102   | 11.197845  |
| C                                                             | -6.4126047 | 0.4126276  | 9.1086203 |   |            |              |            |
| <b>NImag</b>                                                  |            |            |           |   |            | 0            |            |
| <b><math>\Sigma</math> Electronic and thermal Free Energy</b> |            |            |           |   |            | -1819223.235 |            |
| <b>mol Fraction</b>                                           |            |            |           |   |            | 4.53E-10     |            |

**(8S, 13S, 3aS, 8aS, 12aS, 13aR)- Pavesiflonic acid (3) - Conformer 9**

| Atom | X          | Y          | Z          | Atom | X          | Y          | Z          |
|------|------------|------------|------------|------|------------|------------|------------|
| C    | -1.2455804 | -9.3821563 | 0.7419603  | C    | -6.9292566 | -1.2453836 | 9.1857986  |
| C    | -2.4395446 | -9.9659664 | 1.4104569  | C    | 1.8001718  | -5.2346616 | 0.6266063  |
| C    | -2.6123763 | -9.9151198 | 2.8572993  | C    | 2.29475    | -4.0120392 | 0.1920857  |
| C    | -1.6615266 | -9.3483515 | 3.6592362  | C    | 1.4345634  | -2.9783186 | -0.2170847 |
| C    | -0.4560249 | -8.7252789 | 3.1437925  | C    | 0.0582893  | -3.142318  | -0.1700974 |
| C    | -0.084266  | -8.9530877 | 1.6559111  | C    | -0.4706984 | -4.3528902 | 0.2816219  |
| C    | -3.3697615 | -10.554176 | 0.6283516  | C    | -8.2691284 | -1.3717031 | 8.495077   |
| O    | -4.4872294 | -11.135101 | 1.1086264  | C    | 2.8044349  | -6.2713409 | 1.080135   |
| C    | -4.7172804 | -11.091458 | 2.4636386  | O    | 1.9117744  | -1.7825605 | -0.6552718 |
| C    | -3.8656157 | -10.500778 | 3.3369629  | O    | -1.8095055 | -4.4366609 | 0.3265672  |
| C    | -5.9661656 | -11.846676 | 2.809301   | O    | -5.4705318 | 1.1336993  | 11.523127  |
| C    | -6.3008938 | -11.828035 | 4.3140547  | O    | -3.5273834 | -2.6898535 | 9.5219188  |
| C    | -5.0078423 | -11.800376 | 5.1557872  | H    | -1.7788061 | -9.2847639 | 4.7344021  |
| C    | -4.2487808 | -10.50112  | 4.8091411  | H    | -3.2931955 | -10.613884 | -0.4500542 |
| C    | -5.1661037 | -9.2938747 | 5.1632643  | H    | -5.8260565 | -12.882167 | 2.4704493  |
| O    | -6.4097505 | -9.3784477 | 4.5213632  | H    | -6.8025255 | -11.448757 | 2.2200686  |
| C    | -4.1070266 | -13.01813  | 5.0123412  | H    | -6.8866827 | -12.72039  | 4.5557491  |
| C    | -7.1302588 | -10.602607 | 4.7122321  | H    | -5.2883897 | -11.77345  | 6.2167064  |
| O    | -4.8225678 | -14.165547 | 4.9053313  | H    | -3.3505169 | -10.44264  | 5.4253784  |
| O    | -2.8977804 | -13.002598 | 5.0360966  | H    | -7.451232  | -10.687686 | 5.7584312  |
| O    | -5.3579225 | -9.4123637 | 6.6103854  | H    | -8.0209502 | -10.504166 | 4.086074   |
| C    | -5.8883583 | -8.3534969 | 7.2492282  | H    | -4.1706857 | -14.891819 | 4.8737095  |
| C    | -6.0227372 | -7.1117693 | 6.7229371  | H    | -6.2163661 | -8.5900233 | 8.2563015  |
| C    | -5.467676  | -6.8141923 | 5.4145305  | H    | -4.5159174 | -7.8066847 | 3.7457038  |
| C    | -4.6076933 | -7.9100612 | 4.8286952  | H    | -3.5996597 | -7.8279672 | 5.2530931  |
| C    | -6.7171843 | -6.0762513 | 7.5199566  | H    | -5.1512974 | -5.3811589 | 3.8669902  |
| C    | -7.132329  | -4.8021665 | 6.7539483  | H    | -9.2145135 | -5.1266495 | 7.234887   |
| C    | -6.3088699 | -4.4941312 | 5.4757785  | H    | -8.9341244 | -4.0558858 | 5.8276788  |
| C    | -5.6109306 | -5.6048009 | 4.8256093  | H    | -8.7242685 | -5.8158735 | 5.6657452  |
| O    | -7.1089443 | -3.6653248 | 7.6301208  | H    | 1.8462187  | -9.7377677 | 2.2101447  |
| C    | -8.6051759 | -4.9629644 | 6.3417703  | H    | 0.6091317  | -10.993111 | 1.9718339  |
| O    | 0.5378238  | -7.7665358 | 1.1359603  | H    | 1.3168135  | -10.174801 | 0.5548305  |
| C    | 0.9976561  | -10.042343 | 1.5921995  | H    | -3.5149793 | -0.6658289 | 11.014292  |
| O    | 0.3138854  | -8.0828612 | 3.8477284  | H    | -7.5608448 | 0.5464139  | 10.195786  |
| O    | -1.1375263 | -9.3314889 | -0.4702848 | H    | 3.3701644  | -3.8470398 | 0.1773673  |
| O    | -6.3223771 | -3.3631113 | 5.0165962  | H    | -0.6104526 | -2.3411275 | -0.4609512 |

|                                                               |            |            |           |   |            |              |           |
|---------------------------------------------------------------|------------|------------|-----------|---|------------|--------------|-----------|
| O                                                             | -7.0513052 | -6.2373144 | 8.6811742 | H | -8.8910142 | -0.5043303   | 8.7342665 |
| C                                                             | -5.9010745 | -3.3507297 | 8.1410257 | H | -8.1566492 | -1.4324658   | 7.4087972 |
| C                                                             | -5.8474281 | -2.1605899 | 8.9883693 | H | -8.8010258 | -2.275221    | 8.8081066 |
| O                                                             | -4.9251394 | -4.0730392 | 7.8896589 | H | 2.84415    | -7.121499    | 0.3919096 |
| C                                                             | -0.2601322 | -6.6823248 | 1.0601298 | H | 3.8018674  | -5.8244381   | 1.1308663 |
| C                                                             | 0.3877836  | -5.4364334 | 0.6586938 | H | 2.5495593  | -6.6736766   | 2.0645437 |
| O                                                             | -1.4722475 | -6.7962226 | 1.2993713 | H | 2.8814156  | -1.7989929   | -0.625982 |
| C                                                             | -4.609438  | -1.9098136 | 9.6605754 | H | -2.0371442 | -5.3137801   | 0.7224438 |
| C                                                             | -4.4707622 | -0.8146617 | 10.519726 | H | -4.5851944 | 1.1751881    | 11.918413 |
| C                                                             | -5.5403109 | 0.0485624  | 10.705611 | H | -3.7573321 | -3.3962627   | 8.8650932 |
| C                                                             | -6.756403  | -0.1634254 | 10.036288 |   |            |              |           |
| <b>NImag</b>                                                  |            |            |           |   |            | 0            |           |
| <b><math>\Sigma</math> Electronic and thermal Free Energy</b> |            |            |           |   |            | -1819233.804 |           |
| <b>mol Fraction</b>                                           |            |            |           |   |            | 0.025820741  |           |

**(8S, 13S, 3aS, 8aS, 12aS, 13aR)- Pavesiflonic acid (3) - Conformer 10**

| Atom | X          | Y          | Z          | Atom | X          | Y          | Z         |
|------|------------|------------|------------|------|------------|------------|-----------|
| C    | -1.1389492 | -9.2904514 | 1.0690251  | C    | -5.431842  | -1.5400446 | 8.5628026 |
| C    | -2.2744545 | -10.135441 | 1.5310536  | C    | 0.1669339  | -4.5524237 | 2.036913  |
| C    | -2.500081  | -10.381879 | 2.9477233  | C    | 0.3005262  | -3.2010861 | 2.3637043 |
| C    | -1.5482334 | -10.091513 | 3.8815157  | C    | -0.4512513 | -2.6433033 | 3.4034604 |
| C    | -0.3007642 | -9.4280992 | 3.5596258  | C    | -1.3441634 | -3.4184152 | 4.1292194 |
| C    | -0.0472477 | -8.9313494 | 2.1039649  | C    | -1.5111907 | -4.7622777 | 3.7985357 |
| C    | -3.1199482 | -10.657123 | 0.6164143  | C    | -6.5412424 | -2.3946607 | 9.1358595 |
| O    | -4.2149408 | -11.384818 | 0.9405491  | C    | 1.0050806  | -5.1011484 | 0.9023384 |
| C    | -4.5988751 | -11.421041 | 2.2604794  | O    | -0.349133  | -1.3209759 | 3.7565659 |
| C    | -3.8213951 | -10.922885 | 3.2509372  | O    | -2.3672548 | -5.52977   | 4.5106024 |
| C    | -5.9200081 | -12.108502 | 2.4417858  | O    | -3.8284997 | 1.6050796  | 9.4756556 |
| C    | -6.4520608 | -12.0599   | 3.8941696  | O    | -3.0886906 | -1.3489188 | 5.7521058 |
| C    | -5.3022281 | -12.077518 | 4.9158896  | H    | -1.6856069 | -10.319462 | 4.9328303 |
| C    | -4.4174381 | -10.839932 | 4.6424271  | H    | -2.9980258 | -10.539312 | -0.45297  |
| C    | -5.2803152 | -9.5437031 | 4.7653766  | H    | -5.791257  | -13.153994 | 2.1359981 |
| O    | -6.4682548 | -9.6099764 | 4.0271506  | H    | -6.6508647 | -11.668439 | 1.7514106 |
| C    | -4.5121085 | -13.375663 | 4.8917139  | H    | -7.1023813 | -12.926539 | 4.0532701 |
| C    | -7.2636034 | -10.792825 | 4.1748958  | H    | -5.7136619 | -11.988755 | 5.930284  |
| O    | -3.4152969 | -13.3079   | 5.6803832  | H    | -3.6330128 | -10.779323 | 5.3962532 |
| O    | -4.8190417 | -14.374491 | 4.2781134  | H    | -7.6934826 | -10.832483 | 5.1849335 |
| O    | -5.6008642 | -9.4694007 | 6.1977003  | H    | -8.0797874 | -10.670592 | 3.4578501 |
| C    | -5.9110199 | -8.2712787 | 6.719254   | H    | -2.9745635 | -14.176944 | 5.6217805 |
| C    | -5.8632415 | -7.0860658 | 6.0582822  | H    | -6.2272056 | -8.3402046 | 7.7553972 |
| C    | -5.3490768 | -7.0387232 | 4.7016842  | H    | -4.430709  | -8.304957  | 3.2235093 |
| C    | -4.5797696 | -8.2668107 | 4.3014818  | H    | -3.5837983 | -8.2034282 | 4.7550049 |
| C    | -6.2641955 | -5.8469561 | 6.7490276  | H    | -5.002492  | -5.9174303 | 2.928451  |
| C    | -6.6253468 | -4.6561448 | 5.8348154  | H    | -8.5154136 | -5.5362264 | 5.2070506 |
| C    | -6.01378   | -4.6854859 | 4.4040833  | H    | -8.6140327 | -4.540136  | 6.6822836 |
| C    | -5.4383928 | -5.9379392 | 3.9220331  | H    | -8.4301718 | -3.7625351 | 5.0786639 |
| O    | -6.2850297 | -3.4147699 | 6.4840257  | H    | 2.0715861  | -9.1806713 | 2.326171  |
| C    | -8.1551713 | -4.623671  | 5.6932709  | H    | 1.2711211  | -10.558498 | 1.5383172 |
| O    | 0.1203351  | -7.4883989 | 2.1793256  | H    | 1.5120543  | -9.0516605 | 0.6228796 |
| C    | 1.2974087  | -9.4655517 | 1.6108003  | H    | -2.6284985 | 0.8167832  | 7.2001962 |
| O    | 0.5627602  | -9.2069862 | 4.4015239  | H    | -5.609581  | -0.0932494 | 10.154121 |
| O    | -1.0208946 | -8.9447214 | -0.0945788 | H    | 0.99079    | -2.5789896 | 1.7971775 |
| O    | -6.0723202 | -3.6731622 | 3.7232056  | H    | -1.9248892 | -2.9815247 | 4.9322094 |



|                                                               |            |            |           |   |            |              |           |
|---------------------------------------------------------------|------------|------------|-----------|---|------------|--------------|-----------|
| O                                                             | -6.3855719 | -5.7609173 | 7.9617914 | H | -6.713783  | -2.1299686   | 10.183276 |
| C                                                             | -4.969339  | -3.1637404 | 6.6570162 | H | -7.4754792 | -2.2280107   | 8.58741   |
| C                                                             | -4.7231599 | -1.8911264 | 7.3861958 | H | -6.3303999 | -3.4647037   | 9.0731752 |
| O                                                             | -4.104941  | -3.9283549 | 6.255002  | H | 0.4229269  | -5.7348611   | 0.226704  |
| C                                                             | -1.01039   | -6.7761627 | 2.4325221 | H | 1.4362367  | -4.2822911   | 0.3182783 |
| C                                                             | -0.7579914 | -5.3503835 | 2.7501096 | H | 1.8254953  | -5.718647    | 1.2828835 |
| O                                                             | -2.1077252 | -7.3078943 | 2.4131665 | H | 0.298312   | -0.8922654   | 3.1752505 |
| C                                                             | -3.7130155 | -1.0241612 | 6.9140127 | H | -2.8676065 | -4.9677856   | 5.1357959 |
| C                                                             | -3.4000431 | 0.1552899  | 7.5913234 | H | -3.1107578 | 2.0972847    | 9.0474398 |
| C                                                             | -4.0907057 | 0.4757224  | 8.7599303 | H | -2.4055434 | -0.6960257   | 5.528251  |
| C                                                             | -5.0954545 | -0.3681193 | 9.2392752 |   |            |              |           |
| <b>NImag</b>                                                  |            |            |           |   |            | 0            |           |
| <b><math>\Sigma</math> Electronic and thermal Free Energy</b> |            |            |           |   |            | -1819216.215 |           |
| <b>mol Fraction</b>                                           |            |            |           |   |            | 3.20E-15     |           |

**(8S, 13S, 3aS, 8aS, 12aS, 13aR)- Pavesiflonic acid (3) - Conformer 11**

| Atom | X          | Y          | Z         | Atom | X          | Y          | Z          |
|------|------------|------------|-----------|------|------------|------------|------------|
| C    | -0.9862314 | -9.4214363 | 1.2358036 | C    | -5.0764314 | -0.7773    | 7.644743   |
| C    | -2.130377  | -10.234326 | 1.7239796 | C    | 0.3723379  | -4.9206464 | 0.6355002  |
| C    | -2.4447042 | -10.333504 | 3.1434643 | C    | 0.5062397  | -3.5816693 | 0.273731   |
| C    | -1.5833182 | -9.8543832 | 4.0870657 | C    | -0.2315077 | -2.585098  | 0.920193   |
| C    | -0.402746  | -9.0694315 | 3.7651611 | C    | -1.1184751 | -2.9134298 | 1.9426887  |
| C    | 0.01441    | -8.8864389 | 2.2799546 | C    | -1.2754093 | -4.2521017 | 2.3130204  |
| C    | -2.906641  | -10.858743 | 0.8121627 | C    | -5.5024541 | -0.5183394 | 6.2156798  |
| O    | -4.0158511 | -11.557638 | 1.1333753 | C    | 1.1919104  | -5.9394829 | -0.1277673 |
| C    | -4.4773594 | -11.484813 | 2.427659  | O    | -0.0384663 | -1.2999443 | 0.5082779  |
| C    | -3.7633101 | -10.906945 | 3.4240892 | O    | -2.0889296 | -4.599291  | 3.3305734  |
| C    | -5.8210097 | -12.136136 | 2.5589291 | O    | -4.2360692 | 1.3016435  | 10.520462  |
| C    | -6.4729236 | -11.912816 | 3.9387157 | O    | -4.3217918 | -3.4787077 | 10.012525  |
| C    | -5.4094654 | -11.917721 | 5.0508643 | H    | -1.7871466 | -9.9435766 | 5.1485545  |
| C    | -4.4426754 | -10.743175 | 4.7774016 | H    | -2.710927  | -10.846602 | -0.2526923 |
| C    | -5.2578857 | -9.4112828 | 4.7865852 | H    | -5.6940898 | -13.211138 | 2.3826931  |
| O    | -6.3335374 | -9.4505895 | 3.8911842 | H    | -6.472909  | -11.762082 | 1.7593079  |
| C    | -4.6986049 | -13.25478  | 5.1822737 | H    | -7.1972969 | -12.715373 | 4.1141058  |
| C    | -7.2170737 | -10.574857 | 4.0244598 | H    | -5.8919957 | -11.736688 | 6.020159   |
| O    | -3.6551236 | -13.18391  | 6.0401103 | H    | -3.7028912 | -10.688689 | 5.5770967  |
| O    | -5.0243615 | -14.283382 | 4.6304262 | H    | -7.7636549 | -10.506691 | 4.97405    |
| O    | -5.783128  | -9.2948684 | 6.1518927 | H    | -7.9333626 | -10.464603 | 3.2061547  |
| C    | -6.2158888 | -8.0857091 | 6.5536788 | H    | -3.2699138 | -14.079752 | 6.0849971  |
| C    | -5.9653504 | -6.9083238 | 5.9244862 | H    | -6.7964971 | -8.132972  | 7.4695789  |
| C    | -5.0923745 | -6.8867915 | 4.7741622 | H    | -4.141472  | -8.2165187 | 3.3834828  |
| C    | -4.4223397 | -8.1870412 | 4.4361587 | H    | -3.4889988 | -8.2269667 | 5.0087565  |
| C    | -6.5315807 | -5.6524664 | 6.4640976 | H    | -4.0077381 | -5.787335  | 3.3269487  |
| C    | -6.2780368 | -4.3607374 | 5.6340498 | H    | -7.7433116 | -4.8920943 | 4.1073665  |
| C    | -5.0794717 | -4.4447523 | 4.6628322 | H    | -8.3963952 | -3.9814803 | 5.4946403  |
| C    | -4.7327034 | -5.7495114 | 4.1322969 | H    | -7.419974  | -3.1472092 | 4.2513508  |
| O    | -6.1350156 | -3.2396985 | 6.5108071 | H    | 2.0849934  | -9.165826  | 2.7747588  |
| C    | -7.5479153 | -4.0775189 | 4.8118085 | H    | 1.2725465  | -10.660881 | 2.256765   |
| O    | 0.2678726  | -7.4866727 | 2.0202    | H    | 1.6996354  | -9.4298779 | 1.0419568  |
| C    | 1.3630958  | -9.5850404 | 2.0699433 | H    | -3.9516914 | -1.2370735 | 11.355802  |
| O    | 0.2935526  | -8.5530247 | 4.6302714 | H    | -4.956683  | 1.3352946  | 8.0709296  |
| O    | -0.8027591 | -9.2160759 | 0.046463  | H    | 1.1804224  | -3.2908992 | -0.5248766 |
| O    | -4.4786415 | -3.4183203 | 4.3293976 | H    | -1.6786208 | -2.1430969 | 2.4691142  |

|                                                               |            |            |           |   |            |             |            |
|---------------------------------------------------------------|------------|------------|-----------|---|------------|-------------|------------|
| O                                                             | -7.2427735 | -5.6078376 | 7.4521007 | H | -5.0034418 | -1.1827407  | 5.5061931  |
| C                                                             | -5.0632804 | -3.3134395 | 7.3537607 | H | -6.5791313 | -0.6821003  | 6.0961168  |
| C                                                             | -4.8914285 | -2.0829667 | 8.1676424 | H | -5.2857929 | 0.5194675   | 5.9446666  |
| O                                                             | -4.3622934 | -4.3044372 | 7.3990096 | H | 0.6001694  | -6.8076606  | -0.4308782 |
| C                                                             | -0.8326867 | -6.6866767 | 2.0193393 | H | 1.6190909  | -5.4789218  | -1.0234477 |
| C                                                             | -0.5387265 | -5.2764355 | 1.6647474 | H | 2.0152059  | -6.3191652  | 0.4865439  |
| O                                                             | -1.9371278 | -7.1464192 | 2.2667271 | H | -0.6056082 | -0.7113535  | 1.0307902  |
| C                                                             | -4.4748028 | -2.2253895 | 9.5106094 | H | -2.7215345 | -3.8902007  | 3.5806741  |
| C                                                             | -4.2594188 | -1.1060226 | 10.318871 | H | -3.9526277 | 1.0574054   | 11.41529   |
| C                                                             | -4.4393592 | 0.1700777  | 9.7878851 | H | -4.0714696 | -3.4133749  | 10.947089  |
| C                                                             | -4.8390473 | 0.3291599  | 8.4591949 |   |            |             |            |
| <b>NImag</b>                                                  |            |            |           |   |            | 0           |            |
| <b><math>\Sigma</math> Electronic and thermal Free Energy</b> |            |            |           |   |            | -1819214.92 |            |
| <b>mol Fraction</b>                                           |            |            |           |   |            | 3.58E-16    |            |

**(8S, 13S, 3aS, 8aS, 12aS, 13aR)- Pavesiflonic acid (3) - Conformer 12**

| Atom | X          | Y          | Z         | Atom | X          | Y          | Z          |
|------|------------|------------|-----------|------|------------|------------|------------|
| C    | -1.1574427 | -9.1752784 | 1.1072444 | C    | -5.308322  | -0.723358  | 6.8192198  |
| C    | -2.2692577 | -10.05692  | 1.5560606 | C    | 0.0439077  | -4.4404056 | 1.9037646  |
| C    | -2.4944537 | -10.321483 | 2.9696474 | C    | 0.1754237  | -3.0759817 | 2.1636259  |
| C    | -1.5570108 | -10.009643 | 3.9105552 | C    | -0.5161392 | -2.4786954 | 3.2238386  |
| C    | -0.3327384 | -9.2976582 | 3.6019625 | C    | -1.3586438 | -3.2316415 | 4.0358757  |
| C    | -0.0766551 | -8.8021911 | 2.1470568 | C    | -1.5195098 | -4.5952751 | 3.7786208  |
| C    | -3.0967031 | -10.59291  | 0.6329067 | C    | -6.5322071 | -0.7291045 | 5.9290294  |
| O    | -4.1737515 | -11.350937 | 0.9457232 | C    | 0.8179443  | -5.0282501 | 0.7433024  |
| C    | -4.5654478 | -11.403276 | 2.2634413 | O    | -0.3957749 | -1.149225  | 3.5091507  |
| C    | -3.8043455 | -10.896062 | 3.2617712 | O    | -2.3030183 | -5.3623277 | 4.564804   |
| C    | -5.8763605 | -12.11324  | 2.4310676 | O    | -3.4096968 | 1.8354748  | 8.5876891  |
| C    | -6.4254839 | -12.068769 | 3.8769369 | O    | -2.7032197 | -2.9026069 | 8.227952   |
| C    | -5.2866854 | -12.073831 | 4.9110677 | H    | -1.6950556 | -10.2455   | 4.960066   |
| C    | -4.4131466 | -10.826168 | 4.6485989 | H    | -2.9728455 | -10.462946 | -0.4348841 |
| C    | -5.2920359 | -9.5400047 | 4.7652919 | H    | -5.7271753 | -13.157447 | 2.1301365  |
| O    | -6.4686643 | -9.6186155 | 4.0091323 | H    | -6.6062471 | -11.686945 | 1.7311492  |
| C    | -4.4821029 | -13.363154 | 4.8953697 | H    | -7.0685717 | -12.941973 | 4.0295255  |
| C    | -7.2532825 | -10.809702 | 4.1473855 | H    | -5.7100804 | -11.990069 | 5.9209397  |
| O    | -3.3942066 | -13.283537 | 5.6953926 | H    | -3.6364258 | -10.758845 | 5.4098858  |
| O    | -4.7713524 | -14.365589 | 4.2789678 | H    | -7.6948513 | -10.853949 | 5.1521574  |
| O    | -5.6338172 | -9.4733242 | 6.1913745 | H    | -8.0620368 | -10.696267 | 3.4205166  |
| C    | -5.9707157 | -8.2796236 | 6.7087075 | H    | -2.944065  | -14.148034 | 5.6414076  |
| C    | -5.9200076 | -7.0911729 | 6.0544407 | H    | -6.3103322 | -8.3544821 | 7.7369486  |
| C    | -5.3810883 | -7.0340845 | 4.70942   | H    | -4.4373212 | -8.2877483 | 3.2376496  |
| C    | -4.5988944 | -8.254863  | 4.3138682 | H    | -3.6087466 | -8.1842107 | 4.7789398  |
| C    | -6.3615587 | -5.8629284 | 6.7434151 | H    | -5.0062644 | -5.9050728 | 2.946101   |
| C    | -6.6613776 | -4.6472446 | 5.836763  | H    | -8.6373707 | -4.4345101 | 6.6792199  |
| C    | -6.0279048 | -4.6796197 | 4.4168833 | H    | -8.4277845 | -3.6768279 | 5.0680104  |
| C    | -5.4615426 | -5.930905  | 3.930847  | H    | -8.5857266 | -5.4431346 | 5.2113467  |
| O    | -6.2598026 | -3.4303383 | 6.5029511 | H    | 2.0432025  | -9.0321608 | 2.3820951  |
| C    | -8.185568  | -4.5426918 | 5.6894905 | H    | 1.2593769  | -10.423407 | 1.600335   |
| O    | 0.0776197  | -7.359358  | 2.2090147 | H    | 1.4927753  | -8.920763  | 0.6752044  |
| C    | 1.2755204  | -9.3297066 | 1.6647115 | H    | -2.1243314 | -0.4742608 | 9.0719364  |
| O    | 0.5102487  | -9.0400734 | 4.4540454 | H    | -5.4214902 | 1.4144191  | 7.0776948  |
| O    | -1.0509046 | -8.8059102 | -0.050477 | H    | 0.8199842  | -2.469304  | 1.5303538  |
| O    | -6.0417441 | -3.6533205 | 3.7483701 | H    | -1.8844172 | -2.76121   | 4.8601785  |

|                                                               |            |            |           |   |            |              |           |
|---------------------------------------------------------------|------------|------------|-----------|---|------------|--------------|-----------|
| O                                                             | -6.5694377 | -5.7985    | 7.9436281 | H | -6.4011405 | -1.3653461   | 5.0499745 |
| C                                                             | -4.9274327 | -3.2357374 | 6.610047  | H | -7.4060003 | -1.1093837   | 6.4688368 |
| C                                                             | -4.5686019 | -1.8978718 | 7.1295416 | H | -6.7537055 | 0.2898332    | 5.5982988 |
| O                                                             | -4.1351699 | -4.1147848 | 6.2971103 | H | 0.2149739  | -5.7218851   | 0.1500707 |
| C                                                             | -1.0596062 | -6.6571185 | 2.4649674 | H | 1.174754   | -4.2315666   | 0.0832545 |
| C                                                             | -0.8193978 | -5.2154021 | 2.7100555 | H | 1.6873564  | -5.5924051   | 1.0976365 |
| O                                                             | -2.1468788 | -7.2087437 | 2.4931752 | H | 0.2073081  | -0.7466484   | 2.8648949 |
| C                                                             | -3.4097562 | -1.7794502 | 7.9341137 | H | -2.7760877 | -4.8141675   | 5.2247948 |
| C                                                             | -3.0111841 | -0.5415451 | 8.4429951 | H | -2.6024219 | 1.7720351    | 9.1217903 |
| C                                                             | -3.7497803 | 0.5988039  | 8.1323257 | H | -1.9712063 | -2.6672882   | 8.819317  |
| C                                                             | -4.8827443 | 0.5046336  | 7.3196245 |   |            |              |           |
| <b>NImag</b>                                                  |            |            |           |   |            | 0            |           |
| <b><math>\Sigma</math> Electronic and thermal Free Energy</b> |            |            |           |   |            | -1819215.709 |           |
| <b>mol Fraction</b>                                           |            |            |           |   |            | 1.36E-15     |           |

**(8S, 13S, 3aS, 8aS, 12aS, 13aR)- Pavesiflonic acid (3) - Conformer 13**

| Atom | X          | Y          | Z         | Atom | X          | Y          | Z          |
|------|------------|------------|-----------|------|------------|------------|------------|
| C    | -0.9834799 | -9.3929513 | 1.2505487 | C    | -5.1118706 | -0.7905808 | 7.6912914  |
| C    | -2.1263735 | -10.209974 | 1.7338831 | C    | 0.36768    | -4.8973238 | 0.656663   |
| C    | -2.4444865 | -10.312693 | 3.1523355 | C    | 0.4995906  | -3.5563837 | 0.2928271  |
| C    | -1.5878619 | -9.8316191 | 4.099387  | C    | -0.2498273 | -2.5586647 | 0.9254958  |
| C    | -0.4096037 | -9.0415984 | 3.7824258 | C    | -1.1484399 | -2.8847445 | 1.936995   |
| C    | 0.0115575  | -8.8555938 | 2.2987845 | C    | -1.3027327 | -4.2206933 | 2.308722   |
| C    | -2.8984174 | -10.83467  | 0.8185841 | C    | -5.5320853 | -0.5247558 | 6.2618565  |
| O    | -4.0062194 | -11.537391 | 1.1351204 | C    | 1.2009241  | -5.9138735 | -0.0949523 |
| C    | -4.4709539 | -11.470017 | 2.428751  | O    | -0.1363183 | -1.2422822 | 0.5899666  |
| C    | -3.7613287 | -10.8923   | 3.4284327 | O    | -2.1289034 | -4.5711658 | 3.3142025  |
| C    | -5.812298  | -12.126952 | 2.5548889 | O    | -4.2809218 | 1.2741244  | 10.580398  |
| C    | -6.4678593 | -11.911136 | 3.9341381 | O    | -4.3667419 | -3.5037544 | 10.049208  |
| C    | -5.4064785 | -11.915775 | 5.0482572 | H    | -1.7947779 | -9.9232351 | 5.1600294  |
| C    | -4.4439555 | -10.736206 | 4.7809781 | H    | -2.6998012 | -10.819552 | -0.2456994 |
| C    | -5.2649417 | -9.4077432 | 4.7940218 | H    | -5.6808305 | -13.200796 | 2.3749458  |
| O    | -6.3379002 | -9.4485108 | 3.8949513 | H    | -6.4639584 | -11.752378 | 1.7553062  |
| C    | -4.6904735 | -13.250338 | 5.1763845 | H    | -7.1893652 | -12.717207 | 4.1052126  |
| C    | -7.2173794 | -10.576309 | 4.0229584 | H    | -5.8914735 | -11.739928 | 6.0172532  |
| O    | -3.6495944 | -13.178551 | 6.0373807 | H    | -3.7059242 | -10.681819 | 5.5822991  |
| O    | -5.0098526 | -14.278131 | 4.6192348 | H    | -7.7659576 | -10.513492 | 4.9717586  |
| O    | -5.7937285 | -9.2999445 | 6.1577262 | H    | -7.9326571 | -10.46627  | 3.2037134  |
| C    | -6.2333646 | -8.0938845 | 6.5637826 | H    | -3.2609449 | -14.073021 | 6.0797481  |
| C    | -5.9861029 | -6.9129623 | 5.9406652 | H    | -6.8164301 | -8.1481104 | 7.4776715  |
| C    | -5.1107044 | -6.8825564 | 4.7920591 | H    | -4.1496985 | -8.2024771 | 3.3987818  |
| C    | -4.4337495 | -8.1784637 | 4.4507661 | H    | -3.5022651 | -8.2169278 | 5.0264532  |
| C    | -6.5598047 | -5.6619322 | 6.4843785 | H    | -4.0300312 | -5.7711147 | 3.3504151  |
| C    | -6.3096614 | -4.3650903 | 5.6617858 | H    | -7.7724414 | -4.8910842 | 4.1309745  |
| C    | -5.1103898 | -4.4395385 | 4.6900754 | H    | -8.4290093 | -3.990704  | 5.5233023  |
| C    | -4.7557981 | -5.7412929 | 4.1554224 | H    | -7.4535613 | -3.1462958 | 4.2859075  |
| O    | -6.1698366 | -3.2486259 | 6.5450137 | H    | 2.0813389  | -9.1282805 | 2.8006143  |
| C    | -7.5797387 | -4.0802926 | 4.8405652 | H    | 1.2756267  | -10.625724 | 2.2794483  |
| O    | 0.2609393  | -7.454764  | 2.0407451 | H    | 1.7029947  | -9.3934041 | 1.0662601  |
| C    | 1.3633057  | -9.5495758 | 2.0930815 | H    | -4.0006054 | -1.2685797 | 11.404339  |
| O    | 0.282472   | -8.5235504 | 4.6499628 | H    | -4.9919486 | 1.3197819  | 8.1277644  |
| O    | -0.795877  | -9.1856179 | 0.062006  | H    | 1.1891193  | -3.2851538 | -0.5041691 |
| O    | -4.5156724 | -3.4095438 | 4.3597408 | H    | -1.7095557 | -2.1014815 | 2.4367277  |

|                                                               |            |            |           |   |            |              |            |
|---------------------------------------------------------------|------------|------------|-----------|---|------------|--------------|------------|
| O                                                             | -7.2744371 | -5.6260109 | 7.4703279 | H | -5.030076  | -1.1852863   | 5.5509481  |
| C                                                             | -5.0989675 | -3.3252125 | 7.388647  | H | -6.6083562 | -0.687821    | 6.1373605  |
| C                                                             | -4.929385  | -2.0987408 | 8.2089376 | H | -5.3139394 | 0.5140702    | 5.9964125  |
| O                                                             | -4.3971761 | -4.3159423 | 7.4299542 | H | 0.6172028  | -6.7864594   | -0.4003635 |
| C                                                             | -0.843402  | -6.6592446 | 2.0327092 | H | 1.6342012  | -5.4554305   | -0.9892732 |
| C                                                             | -0.552801  | -5.2491505 | 1.6745895 | H | 2.0206718  | -6.2865747   | 0.5281718  |
| O                                                             | -1.9467365 | -7.1228222 | 2.2761052 | H | 0.5293711  | -1.1540443   | -0.11013   |
| C                                                             | -4.5174227 | -2.2477787 | 9.5524851 | H | -2.7489886 | -3.8546627   | 3.5732084  |
| C                                                             | -4.3045075 | -1.1324749 | 10.366895 | H | -3.9989407 | 1.0248851    | 11.474286  |
| C                                                             | -4.4820034 | 0.1462255  | 9.8412387 | H | -4.1186828 | -3.4423664   | 10.984621  |
| C                                                             | -4.8769314 | 0.311838   | 8.5120428 |   |            |              |            |
| <b>NImag</b>                                                  |            |            |           |   |            | 0            |            |
| <b><math>\Sigma</math> Electronic and thermal Free Energy</b> |            |            |           |   |            | -1819214.941 |            |
| <b>mol Fraction</b>                                           |            |            |           |   |            | 3.71E-16     |            |
